# Supplementary material
Source: publisher figshare collection journal article supplement (https://acs.figshare.com/ndownloader/files/4396720)
Supplement: Supplementary file 1 [file 4396720]

data_global
# 1. SUBMISSION DETAILS
_publ_contact_letter
;
     Please consider this CIF submission for publication 
     in "Inorganic Chemistry"
; 
_publ_contact_author                          
;Costes jean-Pierre
;
_publ_contact_author_address 
;
Laboratoire de Chimie de Coordination
205 Route de Narbonne
31077 Toulouse Cedex 04
;
_publ_contact_author_email                    
'jean-pierre.costes@lcc-toulouse.fr'

_publ_requested_journal  ' Inorganic Chemistry '

#=============================================================================
# 2. TITLE AND AUTHOR LIST
_publ_section_title
;Face-Sharing Heterotrinuclear MII--LnIII--MII (M = Mn, Fe, Co, Zn; Ln = La, Gd, Tb,
 Dy) Complexes: Synthesis, Structures, and Magnetic Properties
;
loop_
_publ_author_name
_publ_author_address
' Tomoka Yamaguchi '
;
Department of Chemistry
Faculty of Science,
Okayama University,
Tsushima-naka 3-1-1,
Okayama 700-8530
;
'Yukana Kishima'
;
Department of Chemistry
Faculty of Science,
Okayama University,
Tsushima-naka 3-1-1,
Okayama 700-8530
;
'Masaaki Kojima'
;
Department of Chemistry
Faculty of Science,
Okayama University,
Tsushima-naka 3-1-1,
Okayama 700-8530
;
'Yukinari Sunatsuki'
;
Department of Chemistry
Faculty of Science,
Okayama University,
Tsushima-naka 3-1-1,
Okayama 700-8530
;
'Nicolas Brefuel'
;
Laboratoire de Chimie de Coordination
UPR-CNRS 8241
205, route de Narbonne
31077 Toulouse cedex, France 
;
'Jean-Pierre Tuchagues'
;
Laboratoire de Chimie de Coordination
UPR-CNRS 8241
205, route de Narbonne
31077 Toulouse cedex, France 
;
'Laure Vendier'
;
Laboratoire de Chimie de Coordination
UPR-CNRS 8241
205, route de Narbonne
31077 Toulouse cedex, France 
;
'Wolfgang Wernsdorfer'
;
Institut Neel,
CNRS & Universite J. Fourier,
BP 166,
38042 GRENOBLE Cedex 9, France
;
#==============================================================================
_publ_section_references 
;
Altomare, A., Cascarano, G., Giacovazzo, G., Guagliardi, A., Burla, M.C., 
Polidori, G. and Camalli, M. (1994)., SIR92 program for automatic
solution of crystal structures by direct methods. J. Appl. Cryst. 27, 435.

Sheldrick, G. M. (1997). SHELXL97. Program for the refinement
of Crystal Structures. University of Gottingen, Germany.  
 
Stoe, IPDS Manual. Version 2.75. Stoe & Cie, Darmstadt,1996,
Germany.

Stoe, X-RED, Data Reduction for STADI4 and IPDS, 
Revision 1.08. Stoe & Cie, Darmstadt, 1996, Germany.

MULTI SCAN - c.f. r.h. blessing, acta cryst. (1995), a51, 33-38

WINGX - 1.63 Integrated System 
of Windows Programs 
for the Solution, Refinement and Analysis 
of Single Crystal X-Ray Diffraction Data. 
Farrugia, L. J. Appl. Crystallogr., 1999, 32, 837.

ORTEP3 for Windows, Farrugia, L. J. J. Appl. Crystallogr. 1997, 30, 565.;
;

data_1

#----------------------------------------------------------------------------#
#                   CHEMICAL INFORMATION                                     #
#----------------------------------------------------------------------------#
 
_chemical_name_systematic
;
 ?
;
_chemical_formula_moiety                'C58 H60 Co2 Gd N6 O12, N O3' 
_chemical_formula_sum                   'C58 H60 Co2 Gd N7 O15' 
_chemical_formula_weight                1370.24
_chemical_compound_source               'synthesis as described'
 
#----------------------------------------------------------------------------#
#                   UNIT CELL INFORMATION                                    #
#----------------------------------------------------------------------------#
 
_symmetry_cell_setting                  monoclinic
_symmetry_space_group_name_H-M          'C 1 2/c 1'
_symmetry_space_group_name_Hall         '-C 2yc'
_symmetry_Int_Tables_number             15
loop_
    _symmetry_equiv_pos_as_xyz
'x, y, z'
'-x, y, -z+1/2'
'x+1/2, y+1/2, z'
'-x+1/2, y+1/2, -z+1/2'
'-x, -y, -z'
'x, -y, z-1/2'
'-x+1/2, -y+1/2, -z'
'x+1/2, -y+1/2, z-1/2'
 
_cell_length_a                          47.246(9)
_cell_length_b                          24.634(5)
_cell_length_c                          17.997(4)
_cell_angle_alpha                       90
_cell_angle_beta                        111.02(3)
_cell_angle_gamma                       90
_cell_volume                            19552(8)
_cell_formula_units_Z                   12
_cell_measurement_temperature          180
_cell_measurement_reflns_used           8000
_cell_measurement_theta_min             1.65
_cell_measurement_theta_max             26.05
_cell_measurement_wavelength            0.71073
 
#----------------------------------------------------------------------------#
#                   CRYSTAL INFORMATION                                      #
#----------------------------------------------------------------------------#
 
_exptl_crystal_description              block
_exptl_crystal_colour                   orange
_exptl_crystal_size_max                 0.2
_exptl_crystal_size_mid                 0.15
_exptl_crystal_size_min                 0.08
_exptl_crystal_density_diffrn           1.396
_exptl_crystal_density_method           'not measured'
_exptl_crystal_F_000                    8340
_exptl_special_details
;
 ?
;
 
#----------------------------------------------------------------------------#
#                   ABSORPTION CORRECTION                                    #
#----------------------------------------------------------------------------#
 
_exptl_absorpt_coefficient_mu           1.574
_exptl_absorpt_correction_type          refdelf
_exptl_absorpt_process_details
;
        (See: Walker, N. & Stuart, D. (1983) Acta Cryst. A39, 158-166)
;
_exptl_absorpt_correction_T_min         0.765
_exptl_absorpt_correction_T_max         0.876

 
#----------------------------------------------------------------------------#
#                   DATA COLLECTION                                          #
#----------------------------------------------------------------------------#
 
_diffrn_ambient_temperature             180
_diffrn_radiation_wavelength      0.71073
_diffrn_radiation_type            MoK\a
_diffrn_radiation_source          'fine-focus sealed tube'
_diffrn_radiation_monochromator   graphite
_diffrn_measurement_device        'Stoe IPDS' 
_diffrn_measurement_method        \f 
_diffrn_standards_number          200 
_diffrn_standards_interval_count  ? 
_diffrn_standards_interval_time   4 
_diffrn_standards_decay_%         0.1
_diffrn_reflns_av_R_equivalents         0.1733
_diffrn_reflns_av_unetI/netI            0.2617
_diffrn_reflns_number                   95813
_diffrn_reflns_limit_h_min              -57
_diffrn_reflns_limit_h_max              58
_diffrn_reflns_limit_k_min              -30
_diffrn_reflns_limit_k_max              30
_diffrn_reflns_limit_l_min              -22
_diffrn_reflns_limit_l_max              22
_diffrn_reflns_theta_min                2.05
_diffrn_reflns_theta_max                26.09
_diffrn_reflns_theta_full               26.09
_diffrn_measured_fraction_theta_full
                                        0.985
_diffrn_measured_fraction_theta_max
                                        0.985
_reflns_number_total                    19118
_reflns_number_gt                       6171
_reflns_threshold_expression          >2\s(I)
                                        
#----------------------------------------------------------------------------#
#                   COMPUTER PROGRAMS USED                                   #
#----------------------------------------------------------------------------#
 
_computing_data_collection              'Stoe IPDS software (Stoe, 1996)'
_computing_cell_refinement              'Stoe IPDS software (Stoe, 1996)'
_computing_data_reduction               'XRED (Stoe, 1.08, 1996)'
_computing_structure_solution           'SIR92 (Giacovazzo et al, 1993)'
_computing_structure_refinement         'SHELXL-97 (Sheldrick, 1997)'
_computing_molecular_graphics           'Ortep-3 for Windows (Farrugia, 1997)'
_computing_publication_material
                                   'WinGX publication routines (Farrugia, 1999)'
 
#----------------------------------------------------------------------------#
#                   REFINEMENT INFORMATION                                   #
#----------------------------------------------------------------------------#
 
_refine_special_details
;
 Refinement of F^2^ against ALL reflections.  The weighted R-factor wR and
 goodness of fit S are based on F^2^, conventional R-factors R are based
 on F, with F set to zero for negative F^2^. The threshold expression of
 F^2^ > 2sigma(F^2^) is used only for calculating R-factors(gt) etc. and is
 not relevant to the choice of reflections for refinement.  R-factors based
 on F^2^ are statistically about twice as large as those based on F, and R-
 factors based on ALL data will be even larger.
;
_refine_ls_structure_factor_coef        Fsqd
_refine_ls_matrix_type                  full
_refine_ls_weighting_scheme             calc
_refine_ls_weighting_details
         'calc w=1/[\s^2^(Fo^2^)+(0.0427P)^2^+0.0000P] where P=(Fo^2^+2Fc^2^)/3'
_atom_sites_solution_primary            direct
_atom_sites_solution_secondary          difmap
_atom_sites_solution_hydrogens          geom
_refine_ls_hydrogen_treatment           constr
_refine_ls_extinction_method            none
_refine_ls_number_reflns                19118
_refine_ls_number_parameters            1135
_refine_ls_number_restraints            0
_refine_ls_R_factor_all                 0.1727
_refine_ls_R_factor_gt                  0.0497
_refine_ls_wR_factor_ref                0.1185
_refine_ls_wR_factor_gt                 0.0942
_refine_ls_goodness_of_fit_ref          0.684
_refine_ls_restrained_S_all             0.684
_refine_ls_shift/su_max                 0.003
_refine_ls_shift/su_mean                0
_refine_diff_density_max                0.695
_refine_diff_density_min                -1.72
_refine_diff_density_rms                0.1
 
#----------------------------------------------------------------------------#
#                   ATOMIC TYPES, COORDINATES AND THERMAL PARAMETERS         #
#----------------------------------------------------------------------------#
 
loop_
    _atom_type_symbol
    _atom_type_description
    _atom_type_scat_dispersion_real
    _atom_type_scat_dispersion_imag
    _atom_type_scat_source
C C 0.0033 0.0016 'International Tables Vol C Tables 4.2.6.8 and 6.1.1.4'
H H 0 0 'International Tables Vol C Tables 4.2.6.8 and 6.1.1.4'
N N 0.0061 0.0033 'International Tables Vol C Tables 4.2.6.8 and 6.1.1.4'
O O 0.0106 0.006 'International Tables Vol C Tables 4.2.6.8 and 6.1.1.4'
Co Co 0.3494 0.9721 'International Tables Vol C Tables 4.2.6.8 and 6.1.1.4'
Gd Gd -0.1653 3.9035 'International Tables Vol C Tables 4.2.6.8 and 6.1.1.4'
 
loop_
    _atom_site_label
    _atom_site_type_symbol
    _atom_site_fract_x
    _atom_site_fract_y
    _atom_site_fract_z
    _atom_site_U_iso_or_equiv
    _atom_site_adp_type
    _atom_site_occupancy
    _atom_site_symmetry_multiplicity
    _atom_site_calc_flag
    _atom_site_refinement_flags
    _atom_site_disorder_assembly
    _atom_site_disorder_group
C1 C 0.53574(17) 0.9692(3) 0.4613(4) 0.051(2) Uani 1 1 d . . .
H1A H 0.5267 0.9584 0.406 0.061 Uiso 1 1 calc R . .
H1B H 0.5206 0.9891 0.4751 0.061 Uiso 1 1 calc R . .
C2 C 0.57560(15) 0.8959(4) 0.5154(4) 0.053(2) Uani 1 1 d . . .
H2A H 0.5769 0.8578 0.5299 0.064 Uiso 1 1 calc R . .
H2B H 0.5769 0.8986 0.4629 0.064 Uiso 1 1 calc R . .
C3 C 0.54672(17) 0.9311(3) 0.5998(4) 0.048(2) Uani 1 1 d . . .
H3A H 0.5266 0.9291 0.6022 0.058 Uiso 1 1 calc R . .
H3B H 0.5592 0.9037 0.6354 0.058 Uiso 1 1 calc R . .
C4 C 0.54487(17) 0.9190(3) 0.5129(4) 0.046(2) Uani 1 1 d . . .
C5 C 0.52011(19) 0.8746(3) 0.4790(5) 0.059(2) Uani 1 1 d . . .
H5A H 0.5004 0.8902 0.4687 0.088 Uiso 1 1 calc R . .
H5B H 0.5234 0.8457 0.517 0.088 Uiso 1 1 calc R . .
H5C H 0.5212 0.8605 0.4303 0.088 Uiso 1 1 calc R . .
C6 C 0.71801(17) 1.3057(3) 0.8244(5) 0.055(2) Uani 1 1 d . . .
H6A H 0.7237 1.3231 0.8761 0.067 Uiso 1 1 calc R . .
H6B H 0.7054 1.3308 0.7849 0.067 Uiso 1 1 calc R . .
C7 C 0.73894(18) 1.2902(4) 0.7152(5) 0.064(3) Uani 1 1 d . . .
H7A H 0.7387 1.3265 0.6941 0.076 Uiso 1 1 calc R . .
H7B H 0.7547 1.2696 0.705 0.076 Uiso 1 1 calc R . .
C8 C 0.76047(18) 1.2393(3) 0.8438(5) 0.058(2) Uani 1 1 d . . .
H8A H 0.7817 1.2388 0.8496 0.069 Uiso 1 1 calc R . .
H8B H 0.7594 1.2361 0.8965 0.069 Uiso 1 1 calc R . .
C9 C 0.74633(18) 1.2935(3) 0.8066(5) 0.055(2) Uani 1 1 d . . .
C10 C 0.76961(19) 1.3403(4) 0.8408(5) 0.068(3) Uani 1 1 d . . .
H10A H 0.7603 1.3744 0.8199 0.101 Uiso 1 1 calc R . .
H10B H 0.7869 1.3346 0.8258 0.101 Uiso 1 1 calc R . .
H10C H 0.7759 1.3406 0.8978 0.101 Uiso 1 1 calc R . .
C11 C 0.56351(16) 1.0260(3) 0.4072(5) 0.043(2) Uani 1 1 d . . .
H11 H 0.5477 1.0175 0.3601 0.052 Uiso 1 1 calc R . .
C12 C 0.58644(16) 1.0606(3) 0.3993(4) 0.046(2) Uani 1 1 d . . .
C13 C 0.58195(18) 1.0815(3) 0.3236(5) 0.052(2) Uani 1 1 d . . .
H13 H 0.5645 1.0719 0.2812 0.063 Uiso 1 1 calc R . .
C14 C 0.60233(18) 1.1152(4) 0.3102(5) 0.056(2) Uani 1 1 d . . .
H14 H 0.5987 1.1288 0.2594 0.068 Uiso 1 1 calc R . .
C15 C 0.62840(18) 1.1293(4) 0.3722(5) 0.056(2) Uani 1 1 d . . .
H15 H 0.6426 1.1516 0.3626 0.068 Uiso 1 1 calc R . .
C16 C 0.63381(17) 1.1106(3) 0.4487(4) 0.045(2) Uani 1 1 d . . .
C17 C 0.61326(17) 1.0768(3) 0.4632(4) 0.046(2) Uani 1 1 d . . .
C18 C 0.68277(18) 1.1522(4) 0.5030(5) 0.070(3) Uani 1 1 d . . .
H18A H 0.6909 1.1294 0.4722 0.104 Uiso 1 1 calc R . .
H18B H 0.6983 1.1599 0.5535 0.104 Uiso 1 1 calc R . .
H18C H 0.6757 1.1856 0.475 0.104 Uiso 1 1 calc R . .
C19 C 0.62093(16) 0.8951(4) 0.6241(4) 0.049(2) Uani 1 1 d . . .
H19 H 0.6176 0.8578 0.6188 0.059 Uiso 1 1 calc R . .
C20 C 0.64767(16) 0.9126(3) 0.6885(4) 0.049(2) Uani 1 1 d . . .
C21 C 0.66739(17) 0.8720(3) 0.7350(5) 0.048(2) Uani 1 1 d . . .
H21 H 0.6626 0.8356 0.7232 0.057 Uiso 1 1 calc R . .
C22 C 0.69328(18) 0.8854(4) 0.7967(5) 0.056(2) Uani 1 1 d . . .
H22 H 0.7058 0.8578 0.8259 0.067 Uiso 1 1 calc R . .
C23 C 0.70146(19) 0.9389(4) 0.8171(5) 0.058(2) Uani 1 1 d . . .
H23 H 0.7188 0.9474 0.8605 0.07 Uiso 1 1 calc R . .
C24 C 0.68304(18) 0.9792(3) 0.7709(5) 0.048(2) Uani 1 1 d . . .
C25 C 0.65492(16) 0.9668(3) 0.7081(4) 0.042(2) Uani 1 1 d . . .
C26 C 0.71413(18) 1.0508(4) 0.8517(5) 0.065(3) Uani 1 1 d . . .
H26A H 0.7122 1.0348 0.8982 0.098 Uiso 1 1 calc R . .
H26B H 0.7143 1.0897 0.8565 0.098 Uiso 1 1 calc R . .
H26C H 0.7327 1.0389 0.8467 0.098 Uiso 1 1 calc R . .
C27 C 0.54642(17) 1.0139(3) 0.6622(5) 0.046(2) Uani 1 1 d . . .
H27 H 0.5294 0.9989 0.6687 0.055 Uiso 1 1 calc R . .
C28 C 0.55464(16) 1.0669(3) 0.6937(4) 0.044(2) Uani 1 1 d . . .
C29 C 0.53723(16) 1.0888(3) 0.7365(4) 0.046(2) Uani 1 1 d . . .
H29 H 0.521 1.0691 0.7402 0.055 Uiso 1 1 calc R . .
C30 C 0.54420(17) 1.1388(4) 0.7725(5) 0.052(2) Uani 1 1 d . . .
H30 H 0.5331 1.1519 0.8021 0.062 Uiso 1 1 calc R . .
C31 C 0.56744(18) 1.1698(3) 0.7654(5) 0.052(2) Uani 1 1 d . . .
H31 H 0.5719 1.2037 0.7896 0.062 Uiso 1 1 calc R . .
C32 C 0.58389(17) 1.1501(3) 0.7221(5) 0.046(2) Uani 1 1 d . . .
C33 C 0.57805(16) 1.0974(3) 0.6863(4) 0.0427(19) Uani 1 1 d . . .
C34 C 0.61282(18) 1.2305(3) 0.7342(5) 0.053(2) Uani 1 1 d . . .
H34A H 0.5954 1.2512 0.7025 0.08 Uiso 1 1 calc R . .
H34B H 0.6305 1.244 0.7259 0.08 Uiso 1 1 calc R . .
H34C H 0.6155 1.234 0.7894 0.08 Uiso 1 1 calc R . .
C35 C 0.69435(17) 1.2472(3) 0.8872(5) 0.051(2) Uani 1 1 d . . .
H35 H 0.7014 1.2731 0.9273 0.061 Uiso 1 1 calc R . .
C36 C 0.67786(17) 1.2025(3) 0.9041(4) 0.046(2) Uani 1 1 d . . .
C37 C 0.67220(17) 1.2030(4) 0.9754(4) 0.051(2) Uani 1 1 d . . .
H37 H 0.6794 1.2316 1.0108 0.061 Uiso 1 1 calc R . .
C38 C 0.65625(17) 1.1622(4) 0.9937(4) 0.054(2) Uani 1 1 d . . .
H38 H 0.6535 1.1626 1.0424 0.065 Uiso 1 1 calc R . .
C39 C 0.64390(16) 1.1198(3) 0.9399(4) 0.045(2) Uani 1 1 d . . .
H39 H 0.6322 1.093 0.9515 0.054 Uiso 1 1 calc R . .
C40 C 0.64929(16) 1.1183(3) 0.8697(4) 0.044(2) Uani 1 1 d . . .
C41 C 0.66700(16) 1.1584(3) 0.8501(5) 0.045(2) Uani 1 1 d . . .
C42 C 0.62334(19) 1.0332(3) 0.8307(5) 0.056(2) Uani 1 1 d . . .
H42A H 0.637 1.0157 0.8774 0.085 Uiso 1 1 calc R . .
H42B H 0.6174 1.0081 0.787 0.085 Uiso 1 1 calc R . .
H42C H 0.6057 1.0453 0.8405 0.085 Uiso 1 1 calc R . .
C43 C 0.69166(18) 1.2896(4) 0.6123(5) 0.058(2) Uani 1 1 d . . .
H43 H 0.6993 1.3208 0.5974 0.07 Uiso 1 1 calc R . .
C44 C 0.66100(17) 1.2739(4) 0.5637(5) 0.051(2) Uani 1 1 d . . .
C45 C 0.6471(2) 1.3069(4) 0.4951(5) 0.063(2) Uani 1 1 d . . .
H45 H 0.6577 1.3358 0.4844 0.075 Uiso 1 1 calc R . .
C46 C 0.61783(19) 1.2958(4) 0.4445(5) 0.064(3) Uani 1 1 d . . .
H46 H 0.6087 1.3175 0.4 0.077 Uiso 1 1 calc R . .
C47 C 0.60203(18) 1.2524(4) 0.4599(5) 0.059(2) Uani 1 1 d . . .
H47 H 0.5823 1.2452 0.4258 0.071 Uiso 1 1 calc R . .
C48 C 0.61536(17) 1.2202(3) 0.5252(5) 0.045(2) Uani 1 1 d . . .
C49 C 0.64544(17) 1.2297(3) 0.5792(5) 0.044(2) Uani 1 1 d . . .
C50 C 0.57048(16) 1.1674(4) 0.5032(5) 0.059(2) Uani 1 1 d . . .
H50A H 0.5594 1.1979 0.5116 0.089 Uiso 1 1 calc R . .
H50B H 0.5642 1.1351 0.5227 0.089 Uiso 1 1 calc R . .
H50C H 0.5666 1.1636 0.4473 0.089 Uiso 1 1 calc R . .
C51 C 0.7625(2) 1.1555(4) 0.7836(5) 0.061(3) Uani 1 1 d . . .
H51 H 0.7833 1.1608 0.809 0.074 Uiso 1 1 calc R . .
C52 C 0.75371(19) 1.1079(4) 0.7367(5) 0.067(3) Uani 1 1 d . . .
C53 C 0.7769(2) 1.0718(5) 0.7367(7) 0.101(4) Uani 1 1 d . . .
H53 H 0.7971 1.0803 0.7656 0.121 Uiso 1 1 calc R . .
C54 C 0.7700(2) 1.0246(5) 0.6944(7) 0.104(4) Uani 1 1 d . . .
H54 H 0.7858 1.0026 0.6933 0.125 Uiso 1 1 calc R . .
C55 C 0.74034(19) 1.0080(4) 0.6528(6) 0.080(3) Uani 1 1 d . . .
H55 H 0.7359 0.9747 0.6266 0.096 Uiso 1 1 calc R . .
C56 C 0.71776(18) 1.0445(4) 0.6529(5) 0.063(3) Uani 1 1 d . . .
C57 C 0.7235(2) 1.0935(4) 0.6933(5) 0.056(2) Uani 1 1 d . . .
C58 C 0.67924(19) 0.9870(4) 0.5622(5) 0.065(3) Uani 1 1 d . . .
H58A H 0.6885 0.9909 0.5229 0.097 Uiso 1 1 calc R . .
H58B H 0.6576 0.9853 0.5363 0.097 Uiso 1 1 calc R . .
H58C H 0.6864 0.9543 0.592 0.097 Uiso 1 1 calc R . .
C59 C 0.36834(18) 0.4093(4) 0.7382(5) 0.062(2) Uani 1 1 d . . .
H59A H 0.3507 0.3861 0.7159 0.075 Uiso 1 1 calc R . .
H59B H 0.363 0.4452 0.7155 0.075 Uiso 1 1 calc R . .
C60 C 0.3949(2) 0.4644(4) 0.8628(6) 0.064(3) Uani 1 1 d . . .
H60A H 0.3812 0.4948 0.8562 0.077 Uiso 1 1 calc R . .
H60B H 0.4059 0.4595 0.9193 0.077 Uiso 1 1 calc R . .
C61 C 0.39364(18) 0.3625(4) 0.8689(5) 0.057(2) Uani 1 1 d . . .
H61A H 0.3918 0.3584 0.9206 0.068 Uiso 1 1 calc R . .
H61B H 0.3847 0.3308 0.8373 0.068 Uiso 1 1 calc R . .
C62 C 0.3765(2) 0.4128(4) 0.8282(5) 0.060(2) Uani 1 1 d . . .
C63 C 0.3470(2) 0.4160(4) 0.8455(6) 0.078(3) Uani 1 1 d . . .
H63A H 0.3363 0.4486 0.8225 0.117 Uiso 1 1 calc R . .
H63B H 0.3517 0.4165 0.902 0.117 Uiso 1 1 calc R . .
H63C H 0.3346 0.385 0.8229 0.117 Uiso 1 1 calc R . .
C64 C 0.38610(19) 0.3505(4) 0.6617(5) 0.052(2) Uani 1 1 d . . .
H64 H 0.3657 0.3416 0.6389 0.063 Uiso 1 1 calc R . .
C65 C 0.41611(19) 0.5259(4) 0.7970(5) 0.062(3) Uani 1 1 d . . .
H65 H 0.4034 0.5504 0.8093 0.075 Uiso 1 1 calc R . .
C66 C 0.43317(19) 0.5470(4) 0.7514(5) 0.057(2) Uani 1 1 d . . .
C67 C 0.43072(19) 0.6030(4) 0.7354(5) 0.058(2) Uani 1 1 d . . .
H67 H 0.4185 0.6247 0.7539 0.07 Uiso 1 1 calc R . .
C68 C 0.4464(2) 0.6251(4) 0.6923(6) 0.071(3) Uani 1 1 d . . .
H68 H 0.4446 0.6622 0.6819 0.086 Uiso 1 1 calc R . .
C69 C 0.4649(2) 0.5954(4) 0.6636(5) 0.070(3) Uani 1 1 d . . .
H69 H 0.4753 0.612 0.6346 0.084 Uiso 1 1 calc R . .
C70 C 0.46761(18) 0.5400(3) 0.6790(5) 0.051(2) Uani 1 1 d . . .
C71 C 0.45236(18) 0.5151(4) 0.7234(5) 0.051(2) Uani 1 1 d . . .
C72 C 0.49719(18) 0.5231(4) 0.5980(5) 0.059(2) Uani 1 1 d . . .
H72A H 0.4804 0.5294 0.5493 0.088 Uiso 1 1 calc R . .
H72B H 0.5102 0.4957 0.5895 0.088 Uiso 1 1 calc R . .
H72C H 0.5084 0.5562 0.6147 0.088 Uiso 1 1 calc R . .
C74 C 0.50610(18) 0.2625(3) 0.6532(5) 0.053(2) Uani 1 1 d . . .
H74A H 0.5024 0.2278 0.672 0.079 Uiso 1 1 calc R . .
H74B H 0.5267 0.2732 0.6817 0.079 Uiso 1 1 calc R . .
H74C H 0.5027 0.2602 0.5974 0.079 Uiso 1 1 calc R . .
C75 C 0.43904(18) 0.3240(3) 0.6659(4) 0.0412(19) Uani 1 1 d . . .
C76 C 0.45536(17) 0.2929(3) 0.6322(5) 0.045(2) Uani 1 1 d . . .
C77 C 0.44182(19) 0.2560(3) 0.5712(5) 0.054(2) Uani 1 1 d . . .
H77 H 0.4534 0.2342 0.5511 0.065 Uiso 1 1 calc R . .
C78 C 0.4100(2) 0.2528(4) 0.5411(5) 0.062(2) Uani 1 1 d . . .
H78 H 0.4005 0.2292 0.4993 0.074 Uiso 1 1 calc R . .
C79 C 0.39327(19) 0.2824(3) 0.5706(5) 0.051(2) Uani 1 1 d . . .
H79 H 0.3723 0.278 0.5502 0.062 Uiso 1 1 calc R . .
C80 C 0.40626(19) 0.3211(3) 0.6330(5) 0.050(2) Uani 1 1 d . . .
C81 C 0.49444(18) 0.3783(3) 0.9308(5) 0.048(2) Uani 1 1 d . . .
C82 C 0.4780(2) 0.3495(3) 0.9714(5) 0.054(2) Uani 1 1 d . . .
C83 C 0.4951(2) 0.3251(4) 1.0464(5) 0.064(3) Uani 1 1 d . . .
H83 H 0.4847 0.307 1.0741 0.077 Uiso 1 1 calc R . .
C84 C 0.5260(2) 0.3272(4) 1.0789(5) 0.065(3) Uani 1 1 d . . .
H84 H 0.5363 0.309 1.1262 0.078 Uiso 1 1 calc R . .
C85 C 0.5418(2) 0.3567(4) 1.0405(5) 0.063(3) Uani 1 1 d . . .
H85 H 0.5627 0.3603 1.0639 0.076 Uiso 1 1 calc R . .
C86 C 0.52681(19) 0.3802(3) 0.9696(5) 0.049(2) Uani 1 1 d . . .
C87 C 0.44525(18) 0.3476(3) 0.9457(5) 0.050(2) Uani 1 1 d . . .
H87 H 0.437 0.3319 0.9803 0.06 Uiso 1 1 calc R . .
C88 C 0.57048(18) 0.4246(4) 0.9589(5) 0.067(3) Uani 1 1 d . . .
H88A H 0.5723 0.447 1.0041 0.1 Uiso 1 1 calc R . .
H88B H 0.5765 0.4451 0.9216 0.1 Uiso 1 1 calc R . .
H88C H 0.5834 0.3934 0.9761 0.1 Uiso 1 1 calc R . .
N1 N 0.56188(12) 1.0050(3) 0.4712(4) 0.0460(16) Uani 1 1 d . . .
N2 N 0.60121(14) 0.9253(3) 0.5731(4) 0.0464(17) Uani 1 1 d . . .
N3 N 0.55951(13) 0.9846(3) 0.6263(3) 0.0429(16) Uani 1 1 d . . .
N4 N 0.70063(14) 1.2563(3) 0.8242(4) 0.0493(18) Uani 1 1 d . . .
N5 N 0.70944(14) 1.2642(3) 0.6745(4) 0.0537(18) Uani 1 1 d . . .
N6 N 0.74511(15) 1.1927(3) 0.7956(4) 0.0556(19) Uani 1 1 d . . .
N7 N 0.39288(14) 0.3880(3) 0.7157(4) 0.0531(18) Uani 1 1 d . . .
N8 N 0.41634(15) 0.4767(3) 0.8231(4) 0.0554(18) Uani 1 1 d . . .
N9 N 0.42667(15) 0.3657(3) 0.8796(4) 0.0537(18) Uani 1 1 d . . .
O30 O 0.50627(16) 0.1117(3) 0.3148(4) 0.090(2) Uani 1 1 d . . .
O1 O 0.61886(10) 1.0592(2) 0.5372(3) 0.0461(13) Uani 1 1 d . . .
O2 O 0.63811(10) 1.0084(2) 0.6719(3) 0.0493(14) Uani 1 1 d . . .
O3 O 0.59466(11) 1.0811(2) 0.6452(3) 0.0449(13) Uani 1 1 d . . .
O4 O 0.67200(11) 1.1537(2) 0.7819(3) 0.0458(13) Uani 1 1 d . . .
O5 O 0.65687(11) 1.1972(2) 0.6415(3) 0.0495(14) Uani 1 1 d . . .
O6 O 0.70027(12) 1.1244(2) 0.6894(3) 0.0542(15) Uani 1 1 d . . .
O7 O 0.65795(11) 1.1248(2) 0.5157(3) 0.0509(14) Uani 1 1 d . . .
O8 O 0.68882(11) 1.0346(2) 0.7820(3) 0.0532(15) Uani 1 1 d . . .
O9 O 0.60841(11) 1.1752(2) 0.7116(3) 0.0477(13) Uani 1 1 d . . .
O10 O 0.63822(11) 1.0793(2) 0.8113(3) 0.0485(14) Uani 1 1 d . . .
O11 O 0.60240(10) 1.1760(2) 0.5451(3) 0.0498(14) Uani 1 1 d . . .
O12 O 0.68712(11) 1.0330(2) 0.6153(3) 0.0517(14) Uani 1 1 d . . .
O13 O 0.45610(11) 0.4625(2) 0.7361(3) 0.0481(14) Uani 1 1 d . . .
O14 O 0.48589(11) 0.3022(2) 0.6658(3) 0.0478(14) Uani 1 1 d . . .
O15 O 0.45275(12) 0.3578(2) 0.7246(3) 0.0495(14) Uani 1 1 d . . .
O16 O 0.48186(11) 0.4019(2) 0.8614(3) 0.0501(13) Uani 1 1 d . . .
O17 O 0.48617(12) 0.5054(2) 0.6579(3) 0.0516(14) Uani 1 1 d . . .
O18 O 0.53958(11) 0.4073(2) 0.9215(3) 0.0529(14) Uani 1 1 d . . .
O31 O 0.5 0.0363(4) 0.25 0.062(2) Uani 1 2 d S . .
N10 N 0.5 0.0871(6) 0.25 0.066(3) Uani 1 2 d S . .
Co1 Co 0.59459(2) 1.00892(5) 0.58560(6) 0.0438(3) Uani 1 1 d . . .
Co2 Co 0.69831(2) 1.20022(5) 0.73521(6) 0.0477(3) Uani 1 1 d . . .
Co3 Co 0.43671(2) 0.40894(5) 0.79139(6) 0.0491(3) Uani 1 1 d . . .
Gd1 Gd 0.647233(9) 1.103383(18) 0.66169(2) 0.04745(12) Uani 1 1 d . . .
Gd2 Gd 0.5 0.40739(3) 0.75 0.04905(18) Uani 1 2 d S . .
O32 O 0.6603(2) 0.3384(5) 0.1006(6) 0.162(5) Uani 1 1 d . . .
N11 N 0.6462(3) 0.3854(10) 0.0987(10) 0.164(8) Uani 1 1 d . . .
O33 O 0.6281(3) 0.3808(5) 0.1359(8) 0.172(5) Uani 1 1 d . . .
O34 O 0.6497(4) 0.4192(8) 0.0591(14) 0.299(14) Uani 1 1 d . . .
 
loop_
    _atom_site_aniso_label
    _atom_site_aniso_U_11
    _atom_site_aniso_U_22
    _atom_site_aniso_U_33
    _atom_site_aniso_U_23
    _atom_site_aniso_U_13
    _atom_site_aniso_U_12
C1 0.054(5) 0.055(6) 0.039(4) 0.002(4) 0.011(4) -0.004(4)
C2 0.055(5) 0.054(5) 0.052(5) -0.010(5) 0.021(4) -0.001(5)
C3 0.049(5) 0.048(5) 0.050(5) 0.001(4) 0.020(4) 0.000(4)
C4 0.056(5) 0.042(5) 0.041(4) -0.005(4) 0.018(4) 0.003(4)
C5 0.081(6) 0.048(5) 0.053(5) -0.013(4) 0.031(5) -0.018(4)
C6 0.051(5) 0.054(6) 0.058(5) 0.002(5) 0.015(4) -0.021(4)
C7 0.065(5) 0.065(6) 0.062(6) 0.008(5) 0.024(5) -0.016(5)
C8 0.054(5) 0.056(6) 0.063(6) 0.003(5) 0.021(4) -0.001(4)
C9 0.058(5) 0.049(6) 0.056(5) 0.008(5) 0.021(4) -0.009(4)
C10 0.072(6) 0.060(6) 0.069(6) -0.006(5) 0.022(5) -0.029(5)
C11 0.043(4) 0.046(5) 0.039(5) 0.000(4) 0.011(4) -0.004(4)
C12 0.045(5) 0.059(6) 0.033(4) 0.004(4) 0.013(4) 0.007(4)
C13 0.050(5) 0.058(6) 0.046(5) 0.001(4) 0.014(4) 0.003(4)
C14 0.068(5) 0.061(6) 0.037(4) 0.004(4) 0.015(4) -0.010(5)
C15 0.051(5) 0.074(7) 0.050(5) -0.009(5) 0.026(4) -0.012(4)
C16 0.048(5) 0.050(5) 0.044(5) 0.004(4) 0.025(4) -0.005(4)
C17 0.054(5) 0.058(6) 0.031(4) 0.001(4) 0.019(4) 0.009(4)
C18 0.058(5) 0.097(8) 0.058(6) 0.011(5) 0.027(5) -0.026(5)
C19 0.057(5) 0.048(5) 0.049(5) -0.008(5) 0.028(4) -0.001(4)
C20 0.045(4) 0.055(6) 0.045(4) -0.003(4) 0.014(4) 0.001(4)
C21 0.061(5) 0.030(5) 0.053(5) -0.001(4) 0.021(4) 0.003(4)
C22 0.053(5) 0.056(6) 0.059(5) -0.001(5) 0.021(4) 0.014(4)
C23 0.057(5) 0.055(6) 0.059(6) 0.008(5) 0.016(4) -0.001(5)
C24 0.066(5) 0.038(5) 0.053(5) 0.005(4) 0.038(5) 0.002(4)
C25 0.038(4) 0.052(6) 0.039(4) 0.007(4) 0.015(4) 0.008(4)
C26 0.061(5) 0.077(7) 0.037(5) 0.000(5) -0.007(4) -0.001(5)
C27 0.048(4) 0.043(5) 0.049(5) 0.008(4) 0.019(4) 0.008(4)
C28 0.043(4) 0.045(5) 0.046(5) 0.001(4) 0.017(4) 0.003(4)
C29 0.042(4) 0.055(6) 0.045(4) 0.000(4) 0.021(4) -0.001(4)
C30 0.049(5) 0.058(6) 0.059(5) -0.010(5) 0.033(4) -0.005(4)
C31 0.067(5) 0.041(5) 0.051(5) -0.007(4) 0.024(5) 0.010(5)
C32 0.048(5) 0.046(5) 0.051(5) 0.003(4) 0.023(4) -0.002(4)
C33 0.052(4) 0.050(5) 0.030(4) -0.007(4) 0.020(4) 0.006(4)
C34 0.069(5) 0.027(5) 0.068(6) -0.011(4) 0.030(5) -0.003(4)
C35 0.053(5) 0.050(6) 0.043(5) -0.005(4) 0.008(4) -0.013(4)
C36 0.057(5) 0.036(5) 0.039(5) 0.001(4) 0.012(4) -0.003(4)
C37 0.063(5) 0.056(6) 0.028(4) -0.002(4) 0.010(4) -0.013(5)
C38 0.055(5) 0.078(7) 0.027(4) 0.005(5) 0.014(4) 0.007(5)
C39 0.041(4) 0.048(5) 0.041(5) 0.005(4) 0.008(4) -0.002(4)
C40 0.047(4) 0.045(5) 0.035(4) 0.008(4) 0.009(4) -0.002(4)
C41 0.046(4) 0.043(5) 0.049(5) 0.012(4) 0.020(4) 0.003(4)
C42 0.074(5) 0.049(6) 0.055(5) 0.013(4) 0.034(5) -0.017(5)
C43 0.062(5) 0.061(6) 0.053(5) 0.008(5) 0.022(5) -0.010(5)
C44 0.050(5) 0.062(6) 0.044(5) -0.001(4) 0.021(4) -0.007(4)
C45 0.071(6) 0.060(6) 0.060(6) 0.021(5) 0.027(5) 0.012(5)
C46 0.061(5) 0.073(7) 0.051(5) 0.025(5) 0.011(5) 0.005(5)
C47 0.046(5) 0.063(6) 0.065(6) 0.015(5) 0.015(4) 0.000(5)
C48 0.049(5) 0.040(5) 0.052(5) 0.011(4) 0.023(4) 0.001(4)
C49 0.044(5) 0.051(5) 0.045(5) -0.006(4) 0.024(4) -0.002(4)
C50 0.046(5) 0.066(6) 0.055(5) 0.006(5) 0.007(4) -0.003(4)
C51 0.055(5) 0.061(6) 0.055(6) -0.001(5) 0.004(4) 0.004(5)
C52 0.052(5) 0.068(7) 0.069(6) -0.010(6) 0.008(5) -0.002(5)
C53 0.045(6) 0.098(9) 0.133(10) -0.033(8) 0.000(6) 0.006(6)
C54 0.063(7) 0.104(10) 0.133(10) -0.034(9) 0.020(7) 0.008(6)
C55 0.050(5) 0.077(7) 0.099(8) -0.021(6) 0.011(5) 0.000(5)
C56 0.044(5) 0.086(8) 0.055(6) 0.010(5) 0.014(4) 0.012(5)
C57 0.074(6) 0.044(6) 0.049(5) -0.008(5) 0.018(5) -0.005(5)
C58 0.068(5) 0.070(7) 0.059(6) -0.026(5) 0.027(5) 0.000(5)
C59 0.059(5) 0.055(6) 0.071(6) -0.005(5) 0.019(4) 0.008(5)
C60 0.085(6) 0.047(6) 0.073(6) -0.006(5) 0.045(5) 0.002(5)
C61 0.065(6) 0.056(6) 0.057(5) 0.001(5) 0.032(5) -0.012(5)
C62 0.077(6) 0.055(6) 0.064(6) -0.009(5) 0.043(5) 0.000(5)
C63 0.081(7) 0.071(7) 0.089(7) 0.002(6) 0.039(6) 0.006(5)
C64 0.053(5) 0.056(6) 0.049(5) 0.000(5) 0.020(4) -0.002(4)
C65 0.064(6) 0.041(6) 0.074(6) 0.000(5) 0.015(5) 0.005(4)
C66 0.062(5) 0.057(6) 0.052(5) 0.001(5) 0.022(5) -0.005(5)
C67 0.076(6) 0.036(5) 0.057(5) 0.003(5) 0.019(5) 0.006(5)
C68 0.082(7) 0.046(6) 0.082(7) -0.001(6) 0.024(6) 0.005(5)
C69 0.088(6) 0.051(6) 0.073(6) 0.024(5) 0.033(5) 0.008(6)
C70 0.058(5) 0.040(5) 0.052(5) 0.007(4) 0.016(4) 0.005(4)
C71 0.052(5) 0.046(6) 0.045(5) 0.005(4) 0.006(4) -0.002(4)
C72 0.063(5) 0.051(6) 0.066(6) 0.023(5) 0.027(5) 0.005(4)
C74 0.071(5) 0.036(5) 0.054(5) -0.005(4) 0.024(4) 0.008(4)
C75 0.061(5) 0.035(5) 0.030(4) 0.008(4) 0.018(4) 0.002(4)
C76 0.049(5) 0.036(5) 0.048(5) -0.001(4) 0.014(4) 0.002(4)
C77 0.061(6) 0.043(5) 0.059(6) -0.003(4) 0.022(5) -0.005(4)
C78 0.071(6) 0.048(6) 0.063(6) -0.017(5) 0.021(5) -0.002(5)
C79 0.052(5) 0.046(5) 0.045(5) -0.007(4) 0.004(4) -0.006(4)
C80 0.067(6) 0.040(5) 0.048(5) 0.002(4) 0.027(4) 0.005(4)
C81 0.062(5) 0.039(5) 0.051(5) -0.005(4) 0.031(5) 0.005(4)
C82 0.081(6) 0.041(5) 0.041(5) -0.004(4) 0.025(5) -0.001(5)
C83 0.095(8) 0.054(6) 0.056(6) 0.005(5) 0.042(6) 0.000(5)
C84 0.082(7) 0.065(7) 0.050(5) 0.009(5) 0.025(5) 0.001(5)
C85 0.068(6) 0.068(7) 0.041(5) 0.002(5) 0.004(5) 0.015(5)
C86 0.064(5) 0.044(5) 0.038(5) -0.003(4) 0.015(4) 0.003(4)
C87 0.061(5) 0.048(5) 0.050(5) -0.005(4) 0.033(5) -0.011(4)
C88 0.056(5) 0.072(7) 0.064(6) -0.004(5) 0.011(5) -0.001(5)
N1 0.038(3) 0.040(4) 0.064(5) -0.007(4) 0.025(3) -0.006(3)
N2 0.047(4) 0.053(4) 0.037(4) -0.001(3) 0.013(3) -0.005(3)
N3 0.044(3) 0.040(4) 0.040(4) -0.005(3) 0.008(3) 0.000(3)
N4 0.052(4) 0.046(4) 0.046(4) 0.000(3) 0.013(3) -0.011(3)
N5 0.052(4) 0.057(5) 0.049(4) 0.000(4) 0.015(3) -0.010(4)
N6 0.060(4) 0.051(5) 0.052(4) -0.001(4) 0.017(4) -0.011(4)
N7 0.065(4) 0.050(5) 0.052(4) 0.002(4) 0.030(3) 0.011(4)
N8 0.066(4) 0.052(5) 0.056(4) -0.007(4) 0.031(4) -0.005(4)
N9 0.059(4) 0.043(4) 0.063(5) 0.000(4) 0.027(4) -0.007(3)
O30 0.119(5) 0.088(6) 0.069(4) -0.011(4) 0.042(4) 0.001(4)
O1 0.041(3) 0.049(3) 0.052(3) -0.001(3) 0.022(3) 0.001(2)
O2 0.048(3) 0.055(4) 0.042(3) 0.000(3) 0.013(2) 0.004(3)
O3 0.055(3) 0.044(3) 0.038(3) -0.001(2) 0.018(2) 0.001(2)
O4 0.051(3) 0.047(3) 0.040(3) 0.003(3) 0.018(3) -0.002(3)
O5 0.056(3) 0.058(4) 0.036(3) 0.008(3) 0.019(3) 0.003(3)
O6 0.057(3) 0.056(4) 0.046(3) 0.000(3) 0.015(3) 0.006(3)
O7 0.048(3) 0.063(4) 0.041(3) -0.002(3) 0.015(3) -0.005(3)
O8 0.055(3) 0.046(4) 0.048(3) 0.006(3) 0.006(3) 0.006(3)
O9 0.048(3) 0.050(4) 0.051(3) -0.005(3) 0.025(3) 0.003(3)
O10 0.052(3) 0.054(4) 0.040(3) -0.006(3) 0.017(3) -0.014(3)
O11 0.042(3) 0.059(4) 0.045(3) 0.009(3) 0.012(3) -0.002(3)
O12 0.047(3) 0.055(4) 0.057(3) -0.006(3) 0.023(3) 0.002(3)
O13 0.058(3) 0.038(4) 0.049(3) 0.002(3) 0.020(3) -0.002(3)
O14 0.058(3) 0.041(3) 0.041(3) -0.005(3) 0.014(3) -0.002(3)
O15 0.069(3) 0.043(3) 0.040(3) -0.004(3) 0.024(3) 0.002(3)
O16 0.071(3) 0.040(3) 0.043(3) 0.003(3) 0.024(3) -0.002(3)
O17 0.069(3) 0.035(3) 0.056(3) 0.007(3) 0.029(3) 0.009(3)
O18 0.050(3) 0.058(4) 0.047(3) 0.001(3) 0.014(3) 0.000(3)
O31 0.046(4) 0.070(7) 0.066(6) 0 0.015(4) 0
N10 0.065(7) 0.072(10) 0.066(8) 0 0.030(6) 0
Co1 0.0457(6) 0.0477(7) 0.0390(6) -0.0024(5) 0.0166(5) -0.0014(5)
Co2 0.0471(6) 0.0525(7) 0.0425(6) 0.0010(6) 0.0148(5) -0.0055(5)
Co3 0.0569(6) 0.0439(7) 0.0492(6) -0.0018(6) 0.0223(5) -0.0002(6)
Gd1 0.0473(2) 0.0509(3) 0.0435(2) -0.0025(2) 0.01537(18) -0.0040(2)
Gd2 0.0555(3) 0.0454(4) 0.0475(3) 0 0.0201(3) 0
O32 0.074(6) 0.203(12) 0.154(9) -0.054(9) -0.026(6) 0.028(7)
N11 0.060(8) 0.28(3) 0.135(13) 0.046(15) 0.013(7) -0.001(12)
O33 0.149(10) 0.174(12) 0.171(11) -0.002(9) 0.030(9) 0.035(9)
O34 0.180(14) 0.30(2) 0.35(3) 0.19(2) 0.012(14) -0.041(13)
 
 
#----------------------------------------------------------------------------#
#                   MOLECULAR GEOMETRY                                       #
#----------------------------------------------------------------------------#
 
_geom_special_details
;
 All esds (except the esd in the dihedral angle between two l.s. planes)
 are estimated using the full covariance matrix.  The cell esds are taken
 into account individually in the estimation of esds in distances, angles
 and torsion angles; correlations between esds in cell parameters are only
 used when they are defined by crystal symmetry.  An approximate (isotropic)
 treatment of cell esds is used for estimating esds involving l.s. planes.
;
loop_
    _geom_bond_atom_site_label_1
    _geom_bond_atom_site_label_2
    _geom_bond_distance
    _geom_bond_site_symmetry_2
    _geom_bond_publ_flag
C1 N1 1.476(9) . ?
C1 C4 1.513(10) . ?
C2 N2 1.471(9) . ?
C2 C4 1.545(10) . ?
C3 N3 1.456(9) . ?
C3 C4 1.564(11) . ?
C4 C5 1.558(10) . ?
C6 N4 1.467(10) . ?
C6 C9 1.513(12) . ?
C7 N5 1.468(9) . ?
C7 C9 1.556(12) . ?
C8 N6 1.464(10) . ?
C8 C9 1.537(11) . ?
C9 C10 1.558(11) . ?
C11 N1 1.291(9) . ?
C11 C12 1.424(11) . ?
C12 C13 1.399(11) . ?
C12 C17 1.430(10) . ?
C13 C14 1.358(11) . ?
C14 C15 1.377(10) . ?
C15 C16 1.386(11) . ?
C16 C17 1.373(11) . ?
C16 O7 1.374(8) . ?
C17 O1 1.333(9) . ?
C18 O7 1.441(9) . ?
C19 N2 1.285(9) . ?
C19 C20 1.441(10) . ?
C20 C25 1.393(11) . ?
C20 C21 1.417(10) . ?
C21 C22 1.366(10) . ?
C22 C23 1.384(11) . ?
C23 C24 1.385(11) . ?
C24 O8 1.391(9) . ?
C24 C25 1.435(10) . ?
C25 O2 1.318(9) . ?
C26 O8 1.445(8) . ?
C27 N3 1.268(9) . ?
C27 C28 1.422(11) . ?
C28 C33 1.382(11) . ?
C28 C29 1.419(11) . ?
C29 C30 1.376(11) . ?
C30 C31 1.382(11) . ?
C31 C32 1.372(11) . ?
C32 O9 1.385(9) . ?
C32 C33 1.431(11) . ?
C33 O3 1.319(8) . ?
C34 O9 1.416(8) . ?
C35 N4 1.290(10) . ?
C35 C36 1.443(11) . ?
C36 C37 1.401(11) . ?
C36 C41 1.425(11) . ?
C37 C38 1.365(11) . ?
C38 C39 1.403(11) . ?
C39 C40 1.375(11) . ?
C40 O10 1.381(9) . ?
C40 C41 1.420(11) . ?
C41 O4 1.336(9) . ?
C42 O10 1.441(9) . ?
C43 N5 1.294(9) . ?
C43 C44 1.451(10) . ?
C44 C49 1.397(11) . ?
C44 C45 1.426(11) . ?
C45 C46 1.381(11) . ?
C46 C47 1.388(12) . ?
C47 C48 1.370(11) . ?
C48 O11 1.359(9) . ?
C48 C49 1.424(10) . ?
C49 O5 1.324(9) . ?
C50 O11 1.439(8) . ?
C51 N6 1.300(11) . ?
C51 C52 1.418(12) . ?
C52 C57 1.406(11) . ?
C52 C53 1.412(13) . ?
C53 C54 1.363(14) . ?
C54 C55 1.393(13) . ?
C55 C56 1.396(12) . ?
C56 C57 1.386(12) . ?
C56 O12 1.390(9) . ?
C57 O6 1.315(10) . ?
C58 O12 1.441(9) . ?
C59 N7 1.457(10) . ?
C59 C62 1.527(12) . ?
C60 N8 1.465(11) . ?
C60 C62 1.542(12) . ?
C61 N9 1.504(10) . ?
C61 C62 1.517(12) . ?
C62 C63 1.534(12) . ?
C64 N7 1.293(10) . ?
C64 C80 1.433(12) . ?
C65 N8 1.299(10) . ?
C65 C66 1.438(12) . ?
C66 C67 1.406(12) . ?
C66 C71 1.422(12) . ?
C67 C68 1.365(13) . ?
C68 C69 1.373(13) . ?
C69 C70 1.389(12) . ?
C70 O17 1.370(10) . ?
C70 C71 1.397(11) . ?
C71 O13 1.316(9) . ?
C72 O17 1.423(9) . ?
C74 O14 1.440(9) . ?
C75 O15 1.319(8) . ?
C75 C76 1.372(11) . ?
C75 C80 1.448(11) . ?
C76 O14 1.368(8) . ?
C76 C77 1.391(11) . ?
C77 C78 1.403(11) . ?
C78 C79 1.321(11) . ?
C79 C80 1.432(11) . ?
C81 O16 1.312(9) . ?
C81 C82 1.431(12) . ?
C81 C86 1.436(11) . ?
C82 C83 1.434(11) . ?
C82 C87 1.447(11) . ?
C83 C84 1.363(12) . ?
C84 C85 1.392(13) . ?
C85 C86 1.349(11) . ?
C86 O18 1.390(10) . ?
C87 N9 1.279(9) . ?
C88 O18 1.436(9) . ?
N1 Co1 2.087(6) . ?
N2 Co1 2.107(7) . ?
N3 Co1 2.125(7) . ?
N4 Co2 2.088(7) . ?
N5 Co2 2.089(7) . ?
N6 Co2 2.093(7) . ?
N7 Co3 2.094(7) . ?
N8 Co3 2.105(7) . ?
N9 Co3 2.102(7) . ?
O30 N10 1.252(8) . ?
O1 Co1 2.080(5) . ?
O1 Gd1 2.417(5) . ?
O2 Co1 2.085(5) . ?
O2 Gd1 2.397(5) . ?
O3 Co1 2.076(5) . ?
O3 Gd1 2.456(5) . ?
O4 Co2 2.076(5) . ?
O4 Gd1 2.402(5) . ?
O5 Co2 2.077(5) . ?
O5 Gd1 2.409(6) . ?
O6 Co2 2.057(6) . ?
O6 Gd1 2.429(5) . ?
O7 Gd1 2.897(5) . ?
O8 Gd1 2.893(5) . ?
O9 Gd1 2.912(5) . ?
O10 Gd1 2.934(5) . ?
O12 Gd1 2.896(5) . ?
O13 Co3 2.056(5) . ?
O13 Gd2 2.416(5) . ?
O15 Co3 2.064(5) . ?
O15 Gd2 2.440(5) . ?
O16 Co3 2.059(5) . ?
O16 Gd2 2.450(5) . ?
O17 Gd2 2.869(5) . ?
O31 N10 1.250(13) . ?
N10 O30 1.252(8) 2_655 ?
Co1 Gd1 3.3214(13) . ?
Co2 Gd1 3.3128(13) . ?
Co3 Gd2 3.3312(13) . ?
Gd2 O13 2.416(5) 2_656 ?
Gd2 O15 2.440(5) 2_656 ?
Gd2 O16 2.450(5) 2_656 ?
Gd2 O17 2.869(5) 2_656 ?
Gd2 Co3 3.3312(13) 2_656 ?
O32 N11 1.33(2) . ?
N11 O34 1.145(19) . ?
N11 O33 1.266(17) . ?
 
loop_
    _geom_angle_atom_site_label_1
    _geom_angle_atom_site_label_2
    _geom_angle_atom_site_label_3
    _geom_angle
    _geom_angle_site_symmetry_1
    _geom_angle_site_symmetry_3
    _geom_angle_publ_flag
N1 C1 C4 111.9(6) . . ?
N2 C2 C4 111.4(6) . . ?
N3 C3 C4 111.5(7) . . ?
C1 C4 C2 112.2(7) . . ?
C1 C4 C5 108.9(6) . . ?
C2 C4 C5 108.6(6) . . ?
C1 C4 C3 111.1(6) . . ?
C2 C4 C3 109.0(6) . . ?
C5 C4 C3 106.9(6) . . ?
N4 C6 C9 111.8(7) . . ?
N5 C7 C9 111.3(7) . . ?
N6 C8 C9 112.2(6) . . ?
C6 C9 C8 111.1(7) . . ?
C6 C9 C7 110.7(7) . . ?
C8 C9 C7 108.1(7) . . ?
C6 C9 C10 108.8(7) . . ?
C8 C9 C10 109.6(6) . . ?
C7 C9 C10 108.4(7) . . ?
N1 C11 C12 128.3(7) . . ?
C13 C12 C11 117.5(7) . . ?
C13 C12 C17 117.5(8) . . ?
C11 C12 C17 125.0(7) . . ?
C14 C13 C12 122.0(7) . . ?
C13 C14 C15 119.6(8) . . ?
C14 C15 C16 121.0(8) . . ?
C17 C16 O7 114.1(7) . . ?
C17 C16 C15 119.9(7) . . ?
O7 C16 C15 125.9(7) . . ?
O1 C17 C16 119.1(7) . . ?
O1 C17 C12 120.9(7) . . ?
C16 C17 C12 120.0(7) . . ?
N2 C19 C20 127.1(8) . . ?
C25 C20 C21 118.5(7) . . ?
C25 C20 C19 123.8(7) . . ?
C21 C20 C19 117.7(8) . . ?
C22 C21 C20 121.0(8) . . ?
C21 C22 C23 122.0(8) . . ?
C22 C23 C24 117.9(8) . . ?
C23 C24 O8 124.7(7) . . ?
C23 C24 C25 121.6(8) . . ?
O8 C24 C25 113.6(7) . . ?
O2 C25 C20 124.8(6) . . ?
O2 C25 C24 116.6(7) . . ?
C20 C25 C24 118.6(7) . . ?
N3 C27 C28 127.8(8) . . ?
C33 C28 C29 119.1(7) . . ?
C33 C28 C27 125.0(8) . . ?
C29 C28 C27 115.9(7) . . ?
C30 C29 C28 120.5(7) . . ?
C29 C30 C31 121.1(8) . . ?
C32 C31 C30 119.2(8) . . ?
C31 C32 O9 126.2(8) . . ?
C31 C32 C33 121.4(8) . . ?
O9 C32 C33 112.3(7) . . ?
O3 C33 C28 123.1(7) . . ?
O3 C33 C32 118.1(7) . . ?
C28 C33 C32 118.7(7) . . ?
N4 C35 C36 129.1(8) . . ?
C37 C36 C41 119.4(7) . . ?
C37 C36 C35 118.8(7) . . ?
C41 C36 C35 121.8(8) . . ?
C38 C37 C36 121.2(8) . . ?
C37 C38 C39 120.7(8) . . ?
C40 C39 C38 119.1(8) . . ?
C39 C40 O10 125.0(7) . . ?
C39 C40 C41 122.0(7) . . ?
O10 C40 C41 113.0(7) . . ?
O4 C41 C40 118.9(7) . . ?
O4 C41 C36 123.6(7) . . ?
C40 C41 C36 117.5(8) . . ?
N5 C43 C44 126.3(8) . . ?
C49 C44 C45 120.3(7) . . ?
C49 C44 C43 124.7(7) . . ?
C45 C44 C43 115.0(8) . . ?
C46 C45 C44 120.0(8) . . ?
C45 C46 C47 120.2(8) . . ?
C48 C47 C46 120.2(7) . . ?
O11 C48 C47 125.3(7) . . ?
O11 C48 C49 112.7(6) . . ?
C47 C48 C49 121.9(8) . . ?
O5 C49 C44 123.8(7) . . ?
O5 C49 C48 118.8(7) . . ?
C44 C49 C48 117.4(7) . . ?
N6 C51 C52 127.8(8) . . ?
C57 C52 C53 118.4(9) . . ?
C57 C52 C51 124.2(9) . . ?
C53 C52 C51 117.3(8) . . ?
C54 C53 C52 120.4(9) . . ?
C53 C54 C55 123.1(10) . . ?
C54 C55 C56 115.5(10) . . ?
C57 C56 O12 114.0(8) . . ?
C57 C56 C55 123.9(8) . . ?
O12 C56 C55 122.0(9) . . ?
O6 C57 C56 118.3(7) . . ?
O6 C57 C52 123.0(8) . . ?
C56 C57 C52 118.6(9) . . ?
N7 C59 C62 113.2(7) . . ?
N8 C60 C62 111.3(7) . . ?
N9 C61 C62 111.7(7) . . ?
C61 C62 C59 110.7(7) . . ?
C61 C62 C63 108.2(8) . . ?
C59 C62 C63 108.5(7) . . ?
C61 C62 C60 110.6(7) . . ?
C59 C62 C60 111.4(8) . . ?
C63 C62 C60 107.3(7) . . ?
N7 C64 C80 127.9(8) . . ?
N8 C65 C66 127.5(9) . . ?
C67 C66 C71 119.1(9) . . ?
C67 C66 C65 116.7(9) . . ?
C71 C66 C65 124.2(9) . . ?
C68 C67 C66 119.1(9) . . ?
C67 C68 C69 123.3(9) . . ?
C68 C69 C70 118.3(10) . . ?
O17 C70 C69 125.3(9) . . ?
O17 C70 C71 113.4(7) . . ?
C69 C70 C71 121.1(9) . . ?
O13 C71 C70 117.9(8) . . ?
O13 C71 C66 123.1(9) . . ?
C70 C71 C66 119.0(8) . . ?
O15 C75 C76 121.0(7) . . ?
O15 C75 C80 120.2(7) . . ?
C76 C75 C80 118.7(7) . . ?
O14 C76 C75 112.4(7) . . ?
O14 C76 C77 124.9(8) . . ?
C75 C76 C77 122.7(7) . . ?
C76 C77 C78 117.8(8) . . ?
C79 C78 C77 121.8(8) . . ?
C78 C79 C80 122.1(8) . . ?
C79 C80 C64 117.8(8) . . ?
C79 C80 C75 116.6(8) . . ?
C64 C80 C75 125.5(7) . . ?
O16 C81 C82 124.2(7) . . ?
O16 C81 C86 119.2(8) . . ?
C82 C81 C86 116.6(8) . . ?
C81 C82 C83 117.5(8) . . ?
C81 C82 C87 124.6(7) . . ?
C83 C82 C87 117.7(8) . . ?
C84 C83 C82 122.9(9) . . ?
C83 C84 C85 119.3(9) . . ?
C86 C85 C84 120.1(9) . . ?
C85 C86 O18 126.7(8) . . ?
C85 C86 C81 123.5(9) . . ?
O18 C86 C81 109.8(6) . . ?
N9 C87 C82 125.7(8) . . ?
C11 N1 C1 116.6(6) . . ?
C11 N1 Co1 127.0(5) . . ?
C1 N1 Co1 116.0(5) . . ?
C19 N2 C2 114.8(7) . . ?
C19 N2 Co1 126.0(5) . . ?
C2 N2 Co1 116.1(5) . . ?
C27 N3 C3 117.4(7) . . ?
C27 N3 Co1 126.7(6) . . ?
C3 N3 Co1 115.2(5) . . ?
C35 N4 C6 116.5(7) . . ?
C35 N4 Co2 126.4(6) . . ?
C6 N4 Co2 115.2(6) . . ?
C43 N5 C7 115.2(7) . . ?
C43 N5 Co2 127.6(6) . . ?
C7 N5 Co2 116.1(5) . . ?
C51 N6 C8 116.2(7) . . ?
C51 N6 Co2 126.2(6) . . ?
C8 N6 Co2 116.4(6) . . ?
C64 N7 C59 117.3(7) . . ?
C64 N7 Co3 125.8(6) . . ?
C59 N7 Co3 115.4(5) . . ?
C65 N8 C60 116.8(8) . . ?
C65 N8 Co3 126.0(7) . . ?
C60 N8 Co3 115.6(5) . . ?
C87 N9 C61 115.8(7) . . ?
C87 N9 Co3 127.9(6) . . ?
C61 N9 Co3 115.8(5) . . ?
C17 O1 Co1 132.1(5) . . ?
C17 O1 Gd1 128.6(5) . . ?
Co1 O1 Gd1 94.9(2) . . ?
C25 O2 Co1 129.1(5) . . ?
C25 O2 Gd1 134.8(4) . . ?
Co1 O2 Gd1 95.4(2) . . ?
C33 O3 Co1 131.3(5) . . ?
C33 O3 Gd1 130.1(4) . . ?
Co1 O3 Gd1 93.9(2) . . ?
C41 O4 Co2 130.7(5) . . ?
C41 O4 Gd1 133.1(5) . . ?
Co2 O4 Gd1 95.2(2) . . ?
C49 O5 Co2 130.2(5) . . ?
C49 O5 Gd1 131.7(5) . . ?
Co2 O5 Gd1 94.9(2) . . ?
C57 O6 Co2 131.3(5) . . ?
C57 O6 Gd1 131.8(5) . . ?
Co2 O6 Gd1 94.9(2) . . ?
C16 O7 C18 116.5(6) . . ?
C16 O7 Gd1 112.9(4) . . ?
C18 O7 Gd1 130.2(4) . . ?
C24 O8 C26 117.1(6) . . ?
C24 O8 Gd1 114.9(4) . . ?
C26 O8 Gd1 128.0(5) . . ?
C32 O9 C34 115.8(6) . . ?
C32 O9 Gd1 114.9(5) . . ?
C34 O9 Gd1 129.0(5) . . ?
C40 O10 C42 116.6(6) . . ?
C40 O10 Gd1 114.7(4) . . ?
C42 O10 Gd1 128.7(4) . . ?
C48 O11 C50 117.8(6) . . ?
C56 O12 C58 117.4(7) . . ?
C56 O12 Gd1 114.1(5) . . ?
C58 O12 Gd1 128.4(4) . . ?
C71 O13 Co3 131.3(6) . . ?
C71 O13 Gd2 128.9(5) . . ?
Co3 O13 Gd2 96.0(2) . . ?
C76 O14 C74 118.1(6) . . ?
C75 O15 Co3 132.5(5) . . ?
C75 O15 Gd2 128.3(5) . . ?
Co3 O15 Gd2 95.0(2) . . ?
C81 O16 Co3 129.5(5) . . ?
C81 O16 Gd2 129.2(5) . . ?
Co3 O16 Gd2 94.84(18) . . ?
C70 O17 C72 117.6(6) . . ?
C70 O17 Gd2 113.5(5) . . ?
C72 O17 Gd2 128.7(5) . . ?
C86 O18 C88 116.5(6) . . ?
O31 N10 O30 119.0(6) . 2_655 ?
O31 N10 O30 119.0(6) . . ?
O30 N10 O30 122.0(13) 2_655 . ?
O3 Co1 O1 78.9(2) . . ?
O3 Co1 O2 78.57(19) . . ?
O1 Co1 O2 76.7(2) . . ?
O3 Co1 N1 114.4(2) . . ?
O1 Co1 N1 86.5(2) . . ?
O2 Co1 N1 156.6(2) . . ?
O3 Co1 N2 156.8(2) . . ?
O1 Co1 N2 114.4(2) . . ?
O2 Co1 N2 86.0(2) . . ?
N1 Co1 N2 86.3(2) . . ?
O3 Co1 N3 85.4(2) . . ?
O1 Co1 N3 158.1(2) . . ?
O2 Co1 N3 115.1(2) . . ?
N1 Co1 N3 86.2(2) . . ?
N2 Co1 N3 85.7(3) . . ?
O3 Co1 Gd1 47.53(14) . . ?
O1 Co1 Gd1 46.48(14) . . ?
O2 Co1 Gd1 45.93(15) . . ?
N1 Co1 Gd1 128.25(19) . . ?
N2 Co1 Gd1 127.66(17) . . ?
N3 Co1 Gd1 128.10(17) . . ?
O6 Co2 O4 77.3(2) . . ?
O6 Co2 O5 78.9(2) . . ?
O4 Co2 O5 77.4(2) . . ?
O6 Co2 N4 155.6(2) . . ?
O4 Co2 N4 85.9(2) . . ?
O5 Co2 N4 114.9(2) . . ?
O6 Co2 N5 114.8(3) . . ?
O4 Co2 N5 158.0(2) . . ?
O5 Co2 N5 86.7(2) . . ?
N4 Co2 N5 87.0(3) . . ?
O6 Co2 N6 86.4(3) . . ?
O4 Co2 N6 114.6(2) . . ?
O5 Co2 N6 158.6(3) . . ?
N4 Co2 N6 84.6(3) . . ?
N5 Co2 N6 85.5(3) . . ?
O6 Co2 Gd1 46.92(15) . . ?
O4 Co2 Gd1 46.22(14) . . ?
O5 Co2 Gd1 46.42(16) . . ?
N4 Co2 Gd1 127.81(19) . . ?
N5 Co2 Gd1 128.19(18) . . ?
N6 Co2 Gd1 128.8(2) . . ?
O13 Co3 O16 78.8(2) . . ?
O13 Co3 O15 77.8(2) . . ?
O16 Co3 O15 77.8(2) . . ?
O13 Co3 N7 110.6(2) . . ?
O16 Co3 N7 160.5(2) . . ?
O15 Co3 N7 87.4(2) . . ?
O13 Co3 N9 162.1(2) . . ?
O16 Co3 N9 87.7(2) . . ?
O15 Co3 N9 111.1(2) . . ?
N7 Co3 N9 85.9(3) . . ?
O13 Co3 N8 87.1(3) . . ?
O16 Co3 N8 112.0(2) . . ?
O15 Co3 N8 160.2(2) . . ?
N7 Co3 N8 86.0(3) . . ?
N9 Co3 N8 87.0(3) . . ?
O13 Co3 Gd2 46.15(15) . . ?
O16 Co3 Gd2 47.14(14) . . ?
O15 Co3 Gd2 46.85(15) . . ?
N7 Co3 Gd2 127.50(19) . . ?
N9 Co3 Gd2 128.81(19) . . ?
N8 Co3 Gd2 127.1(2) . . ?
O2 Gd1 O4 118.54(16) . . ?
O2 Gd1 O5 175.42(18) . . ?
O4 Gd1 O5 65.36(17) . . ?
O2 Gd1 O1 64.95(17) . . ?
O4 Gd1 O1 174.77(17) . . ?
O5 Gd1 O1 111.35(17) . . ?
O2 Gd1 O6 113.12(18) . . ?
O4 Gd1 O6 64.61(18) . . ?
O5 Gd1 O6 65.77(17) . . ?
O1 Gd1 O6 118.34(18) . . ?
O2 Gd1 O3 65.75(16) . . ?
O4 Gd1 O3 111.67(17) . . ?
O5 Gd1 O3 115.73(17) . . ?
O1 Gd1 O3 65.60(16) . . ?
O6 Gd1 O3 175.38(17) . . ?
O2 Gd1 O8 57.56(15) . . ?
O4 Gd1 O8 69.37(16) . . ?
O5 Gd1 O8 124.12(15) . . ?
O1 Gd1 O8 115.59(16) . . ?
O6 Gd1 O8 66.26(17) . . ?
O3 Gd1 O8 110.19(16) . . ?
O2 Gd1 O12 65.84(16) . . ?
O4 Gd1 O12 114.29(16) . . ?
O5 Gd1 O12 110.72(17) . . ?
O1 Gd1 O12 70.44(15) . . ?
O6 Gd1 O12 57.10(17) . . ?
O3 Gd1 O12 124.46(16) . . ?
O8 Gd1 O12 61.79(16) . . ?
O2 Gd1 O7 109.96(16) . . ?
O4 Gd1 O7 122.39(16) . . ?
O5 Gd1 O7 65.46(16) . . ?
O1 Gd1 O7 57.36(16) . . ?
O6 Gd1 O7 69.18(16) . . ?
O3 Gd1 O7 115.43(15) . . ?
O8 Gd1 O7 119.52(15) . . ?
O12 Gd1 O7 60.27(15) . . ?
O2 Gd1 O9 114.77(16) . . ?
O4 Gd1 O9 64.29(15) . . ?
O5 Gd1 O9 68.74(16) . . ?
O1 Gd1 O9 110.96(15) . . ?
O6 Gd1 O9 121.64(17) . . ?
O3 Gd1 O9 56.74(16) . . ?
O8 Gd1 O9 117.32(15) . . ?
O12 Gd1 O9 178.58(15) . . ?
O7 Gd1 O9 120.22(15) . . ?
O2 Gd1 O10 69.09(16) . . ?
O4 Gd1 O10 57.47(16) . . ?
O5 Gd1 O10 115.49(16) . . ?
O1 Gd1 O10 123.00(16) . . ?
O6 Gd1 O10 109.46(16) . . ?
O3 Gd1 O10 65.92(14) . . ?
O8 Gd1 O10 58.50(15) . . ?
O12 Gd1 O10 117.83(15) . . ?
O7 Gd1 O10 178.02(15) . . ?
O9 Gd1 O10 61.67(15) . . ?
O2 Gd1 Co2 142.87(11) . . ?
O4 Gd1 Co2 38.63(13) . . ?
O5 Gd1 Co2 38.66(11) . . ?
O1 Gd1 Co2 140.94(13) . . ?
O6 Gd1 Co2 38.22(14) . . ?
O3 Gd1 Co2 140.32(12) . . ?
O8 Gd1 Co2 85.48(11) . . ?
O12 Gd1 Co2 95.19(11) . . ?
O7 Gd1 Co2 83.80(10) . . ?
O9 Gd1 Co2 83.60(10) . . ?
O10 Gd1 Co2 95.97(10) . . ?
O13 Gd2 O13 111.6(2) . 2_656 ?
O13 Gd2 O15 64.41(17) . . ?
O13 Gd2 O15 174.12(17) 2_656 . ?
O13 Gd2 O15 174.12(17) . 2_656 ?
O13 Gd2 O15 64.41(17) 2_656 2_656 ?
O15 Gd2 O15 119.9(2) . 2_656 ?
O13 Gd2 O16 119.03(17) . 2_656 ?
O13 Gd2 O16 64.94(18) 2_656 2_656 ?
O15 Gd2 O16 112.60(17) . 2_656 ?
O15 Gd2 O16 63.94(17) 2_656 2_656 ?
O13 Gd2 O16 64.94(18) . . ?
O13 Gd2 O16 119.03(17) 2_656 . ?
O15 Gd2 O16 63.94(17) . . ?
O15 Gd2 O16 112.60(17) 2_656 . ?
O16 Gd2 O16 173.7(3) 2_656 . ?
O13 Gd2 O17 66.18(16) . 2_656 ?
O13 Gd2 O17 57.17(17) 2_656 2_656 ?
O15 Gd2 O17 122.22(17) . 2_656 ?
O15 Gd2 O17 108.05(16) 2_656 2_656 ?
O16 Gd2 O17 116.42(17) 2_656 2_656 ?
O16 Gd2 O17 69.36(17) . 2_656 ?
O13 Gd2 O17 57.17(17) . . ?
O13 Gd2 O17 66.18(16) 2_656 . ?
O15 Gd2 O17 108.05(16) . . ?
O15 Gd2 O17 122.22(17) 2_656 . ?
O16 Gd2 O17 69.36(17) 2_656 . ?
O16 Gd2 O17 116.42(17) . . ?
O17 Gd2 O17 65.3(2) 2_656 . ?
O13 Gd2 Co3 37.86(13) . . ?
O13 Gd2 Co3 140.95(13) 2_656 . ?
O15 Gd2 Co3 38.11(12) . . ?
O15 Gd2 Co3 142.97(13) 2_656 . ?
O16 Gd2 Co3 142.10(12) 2_656 . ?
O16 Gd2 Co3 38.02(12) . . ?
O17 Gd2 Co3 84.13(12) 2_656 . ?
O17 Gd2 Co3 94.75(12) . . ?
O13 Gd2 Co3 140.95(13) . 2_656 ?
O13 Gd2 Co3 37.86(13) 2_656 2_656 ?
O15 Gd2 Co3 142.97(13) . 2_656 ?
O15 Gd2 Co3 38.11(13) 2_656 2_656 ?
O16 Gd2 Co3 38.02(12) 2_656 2_656 ?
O16 Gd2 Co3 142.10(12) . 2_656 ?
O17 Gd2 Co3 94.75(12) 2_656 2_656 ?
O17 Gd2 Co3 84.13(12) . 2_656 ?
Co3 Gd2 Co3 178.68(5) . 2_656 ?
O34 N11 O33 132(3) . . ?
O34 N11 O32 118(2) . . ?
O33 N11 O32 110(2) . . ?
#=======================================================================END
data_2

#----------------------------------------------------------------------------#
#                   CHEMICAL INFORMATION                                     #
#----------------------------------------------------------------------------#
 
_chemical_name_systematic
;
 ?
;
_chemical_formula_moiety                'C58 H60 Co2 N6 O12 Tb, N O3' 
_chemical_formula_sum                   'C58 H60 Co2 N7 O15 Tb' 
_chemical_formula_weight                 1371.92
_chemical_compound_source               'synthesis as described'
 
#----------------------------------------------------------------------------#
#                   UNIT CELL INFORMATION                                    #
#----------------------------------------------------------------------------#
 
_symmetry_cell_setting                  monoclinic
_symmetry_space_group_name_H-M          'C 1 2/c 1'
_symmetry_space_group_name_Hall         '-C 2yc'
_symmetry_Int_Tables_number             15
loop_
    _symmetry_equiv_pos_as_xyz
'x, y, z'
'x, -y, z+1/2'
'x+1/2, y+1/2, z'
'x+1/2, -y+1/2, z+1/2'
'-x, -y, -z'
'-x, y, -z-1/2'
'-x+1/2, -y+1/2, -z'
'-x+1/2, y+1/2, -z-1/2'
 
_cell_length_a                          47.7980(14)
_cell_length_b                          24.7480(8)
_cell_length_c                          17.9420(5)
_cell_angle_alpha                       90
_cell_angle_beta                        111.3860(10)
_cell_angle_gamma                       90
_cell_volume                            19762.3(10)
_cell_formula_units_Z                   12
_cell_measurement_temperature           180
_cell_measurement_reflns_used           9653
_cell_measurement_theta_min             2.42
_cell_measurement_theta_max             27.25
_cell_measurement_wavelength            0.71073
 
#----------------------------------------------------------------------------#
#                   CRYSTAL INFORMATION                                      #
#----------------------------------------------------------------------------#
 
_exptl_crystal_description              needle
_exptl_crystal_colour                   orange
_exptl_crystal_size_max                 0.25
_exptl_crystal_size_mid                 0.07
_exptl_crystal_size_min                 0.05
_exptl_crystal_density_diffrn           1.383
_exptl_crystal_density_method           'not measured'
_exptl_crystal_F_000                    8352
_exptl_special_details
;
 ?
;
 
#----------------------------------------------------------------------------#
#                   ABSORPTION CORRECTION                                    #
#----------------------------------------------------------------------------#
 
_exptl_absorpt_coefficient_mu           1.624
_exptl_absorpt_correction_type          multi-scan
_exptl_absorpt_process_details
;
        [c.f. r.h. blessing, acta cryst. (1995), a51, 33-38]
;
_exptl_absorpt_correction_T_min         0.735
_exptl_absorpt_correction_T_max         0.948
 
 
#----------------------------------------------------------------------------#
#                   DATA COLLECTION                                          #
#----------------------------------------------------------------------------#
 
_diffrn_ambient_temperature             180
_diffrn_radiation_type            MoK\a
_diffrn_radiation_source          'fine-focus sealed tube'
_diffrn_radiation_monochromator   graphite
_diffrn_measurement_device_type   'Bruker Kappa APEX II'
_diffrn_measurement_method        \w-\f
_diffrn_standards_number          0
_diffrn_standards_interval_count  0
_diffrn_standards_interval_time   0
_diffrn_standards_decay_%         0
_diffrn_reflns_av_R_equivalents         0.0438
_diffrn_reflns_av_unetI/netI            0.0691
_diffrn_reflns_number                   87201
_diffrn_reflns_limit_h_min              -62
_diffrn_reflns_limit_h_max              57
_diffrn_reflns_limit_k_min              -31
_diffrn_reflns_limit_k_max              32
_diffrn_reflns_limit_l_min              -16
_diffrn_reflns_limit_l_max              22
_diffrn_reflns_theta_min                0.91
_diffrn_reflns_theta_max                27.95
_diffrn_reflns_theta_full               27.95
_diffrn_measured_fraction_theta_full
                                        0.975
_diffrn_measured_fraction_theta_max
                                        0.975
_reflns_number_total                    23148
_reflns_number_gt                       14271
_reflns_threshold_expression         >2\s(I)
#----------------------------------------------------------------------------#
#                   COMPUTER PROGRAMS USED                                   #
#----------------------------------------------------------------------------#
 
_computing_data_collection              'Bruker SMART'
_computing_cell_refinement              'Bruker SMART'
_computing_data_reduction               'Bruker SAINT'
_computing_structure_solution           'SHELXS-86 (Sheldrick, 1986)'
_computing_structure_refinement         'SHELXL-97 (Sheldrick, 1997)'
_computing_molecular_graphics           'Ortep-3 for Windows (Farrugia, 1997)'
_computing_publication_material
                                   'WinGX publication routines (Farrugia, 1999)'
 
#----------------------------------------------------------------------------#
#                   REFINEMENT INFORMATION                                   #
#----------------------------------------------------------------------------#
 
_refine_special_details
;
 Refinement of F^2^ against ALL reflections.  The weighted R-factor wR and
 goodness of fit S are based on F^2^, conventional R-factors R are based
 on F, with F set to zero for negative F^2^. The threshold expression of
 F^2^ > 2sigma(F^2^) is used only for calculating R-factors(gt) etc. and is
 not relevant to the choice of reflections for refinement.  R-factors based
 on F^2^ are statistically about twice as large as those based on F, and R-
 factors based on ALL data will be even larger.
;
_refine_ls_structure_factor_coef        Fsqd
_refine_ls_matrix_type                  full
_refine_ls_weighting_scheme             calc
_refine_ls_weighting_details
         'calc w=1/[\s^2^(Fo^2^)+(0.0743P)^2^+0.0000P] where P=(Fo^2^+2Fc^2^)/3'
_atom_sites_solution_primary            direct
_atom_sites_solution_secondary          difmap
_atom_sites_solution_hydrogens          geom
_refine_ls_hydrogen_treatment           constr
_refine_ls_extinction_method            none
_refine_ls_number_reflns                23148
_refine_ls_number_parameters            1115
_refine_ls_number_restraints            0
_refine_ls_R_factor_all                 0.0774
_refine_ls_R_factor_gt                  0.0457
_refine_ls_wR_factor_ref                0.1282
_refine_ls_wR_factor_gt                 0.1188
_refine_ls_goodness_of_fit_ref          0.927
_refine_ls_restrained_S_all             0.927
_refine_ls_shift/su_max                 0.011
_refine_ls_shift/su_mean                0
_refine_diff_density_max                1.33
_refine_diff_density_min                -0.73
_refine_diff_density_rms                0.117
 
#----------------------------------------------------------------------------#
#                   ATOMIC TYPES, COORDINATES AND THERMAL PARAMETERS         #
#----------------------------------------------------------------------------#
 
loop_
    _atom_type_symbol
    _atom_type_description
    _atom_type_scat_dispersion_real
    _atom_type_scat_dispersion_imag
    _atom_type_scat_source
C C 0.0033 0.0016 'International Tables Vol C Tables 4.2.6.8 and 6.1.1.4'
H H 0 0 'International Tables Vol C Tables 4.2.6.8 and 6.1.1.4'
N N 0.0061 0.0033 'International Tables Vol C Tables 4.2.6.8 and 6.1.1.4'
O O 0.0106 0.006 'International Tables Vol C Tables 4.2.6.8 and 6.1.1.4'
Co Co 0.3494 0.9721 'International Tables Vol C Tables 4.2.6.8 and 6.1.1.4'
Tb Tb -0.1723 4.1537 'International Tables Vol C Tables 4.2.6.8 and 6.1.1.4'
 
loop_
    _atom_site_label
    _atom_site_type_symbol
    _atom_site_fract_x
    _atom_site_fract_y
    _atom_site_fract_z
    _atom_site_U_iso_or_equiv
    _atom_site_adp_type
    _atom_site_occupancy
    _atom_site_symmetry_multiplicity
    _atom_site_calc_flag
    _atom_site_refinement_flags
    _atom_site_disorder_assembly
    _atom_site_disorder_group
C1 C 0.53564(9) 0.97146(17) 0.9608(2) 0.0310(9) Uani 1 1 d . . .
H1A H 0.5269 0.9609 0.905 0.037 Uiso 1 1 calc R . .
H1B H 0.5206 0.9913 0.9739 0.037 Uiso 1 1 calc R . .
C2 C 0.57474(9) 0.89779(17) 1.0149(2) 0.0324(9) Uani 1 1 d . . .
H2A H 0.5761 0.8596 1.0277 0.039 Uiso 1 1 calc R . .
H2B H 0.5757 0.9017 0.962 0.039 Uiso 1 1 calc R . .
C3 C 0.54600(9) 0.93147(17) 1.0995(2) 0.0308(9) Uani 1 1 d . . .
H3A H 0.5259 0.9307 1.1009 0.037 Uiso 1 1 calc R . .
H3B H 0.5578 0.9036 1.1352 0.037 Uiso 1 1 calc R . .
C4 C 0.54439(8) 0.91988(16) 1.0136(2) 0.0279(9) Uani 1 1 d . . .
C5 C 0.52002(10) 0.87801(18) 0.9774(3) 0.0411(11) Uani 1 1 d . . .
H5A H 0.5215 0.8641 0.929 0.062 Uiso 1 1 calc R . .
H5B H 0.5007 0.8944 0.9655 0.062 Uiso 1 1 calc R . .
H5C H 0.5225 0.849 1.0147 0.062 Uiso 1 1 calc R . .
C6 C 0.56334(9) 1.02661(17) 0.9079(2) 0.0317(9) Uani 1 1 d . . .
H6 H 0.548 1.0176 0.8602 0.038 Uiso 1 1 calc R . .
C7 C 0.58660(9) 1.06131(16) 0.9015(2) 0.0276(9) Uani 1 1 d . . .
C8 C 0.58250(9) 1.08049(18) 0.8239(2) 0.0351(10) Uani 1 1 d . . .
H8 H 0.5652 1.0709 0.7812 0.042 Uiso 1 1 calc R . .
C9 C 0.60324(10) 1.11258(19) 0.8104(3) 0.0392(11) Uani 1 1 d . . .
H9 H 0.6002 1.1242 0.7587 0.047 Uiso 1 1 calc R . .
C10 C 0.62924(10) 1.12809(18) 0.8742(2) 0.0362(10) Uani 1 1 d . . .
H10 H 0.6434 1.1503 0.8651 0.043 Uiso 1 1 calc R . .
C11 C 0.63369(9) 1.11016(17) 0.9506(2) 0.0322(10) Uani 1 1 d . . .
C12 C 0.68172(10) 1.1513(2) 1.0056(3) 0.0458(12) Uani 1 1 d . . .
H12A H 0.6896 1.1293 0.9737 0.069 Uiso 1 1 calc R . .
H12B H 0.6973 1.1582 1.0565 0.069 Uiso 1 1 calc R . .
H12C H 0.6747 1.1849 0.9786 0.069 Uiso 1 1 calc R . .
C13 C 0.62052(9) 0.89635(16) 1.1243(2) 0.0294(9) Uani 1 1 d . . .
H13 H 0.6175 0.8592 1.1182 0.035 Uiso 1 1 calc R . .
C14 C 0.64700(9) 0.91343(16) 1.1887(2) 0.0287(9) Uani 1 1 d . . .
C15 C 0.66662(9) 0.87218(18) 1.2333(3) 0.0358(10) Uani 1 1 d . . .
H15 H 0.6616 0.8362 1.2201 0.043 Uiso 1 1 calc R . .
C16 C 0.69276(10) 0.88422(18) 1.2954(3) 0.0385(11) Uani 1 1 d . . .
H16 H 0.7054 0.8566 1.3239 0.046 Uiso 1 1 calc R . .
C17 C 0.70043(9) 0.93848(19) 1.3159(3) 0.0380(10) Uani 1 1 d . . .
H17 H 0.7182 0.9467 1.3581 0.046 Uiso 1 1 calc R . .
C18 C 0.68219(9) 0.97907(17) 1.2746(2) 0.0308(9) Uani 1 1 d . . .
C19 C 0.65430(8) 0.96814(17) 1.2097(2) 0.0285(9) Uani 1 1 d . . .
C20 C 0.71258(10) 1.0484(2) 1.3561(3) 0.0453(12) Uani 1 1 d . . .
H20A H 0.7098 1.0352 1.4032 0.068 Uiso 1 1 calc R . .
H20B H 0.7143 1.0871 1.3588 0.068 Uiso 1 1 calc R . .
H20C H 0.7306 1.0332 1.3531 0.068 Uiso 1 1 calc R . .
C21 C 0.54638(8) 1.01431(16) 1.1622(2) 0.0268(9) Uani 1 1 d . . .
H21 H 0.5292 0.9995 1.1669 0.032 Uiso 1 1 calc R . .
C22 C 0.55468(8) 1.06810(16) 1.1956(2) 0.0273(9) Uani 1 1 d . . .
C23 C 0.53802(9) 1.08979(17) 1.2384(2) 0.0325(10) Uani 1 1 d . . .
H23 H 0.5221 1.07 1.2427 0.039 Uiso 1 1 calc R . .
C24 C 0.54463(9) 1.13952(17) 1.2742(2) 0.0334(10) Uani 1 1 d . . .
H24 H 0.5335 1.1529 1.3032 0.04 Uiso 1 1 calc R . .
C25 C 0.56785(9) 1.16989(17) 1.2671(2) 0.0328(10) Uani 1 1 d . . .
H25 H 0.5723 1.2038 1.2909 0.039 Uiso 1 1 calc R . .
C26 C 0.58429(8) 1.14932(15) 1.2242(2) 0.0273(9) Uani 1 1 d . . .
C27 C 0.57864(8) 1.09839(15) 1.1884(2) 0.0218(8) Uani 1 1 d . . .
C28 C 0.61294(10) 1.22986(16) 1.2373(3) 0.0382(10) Uani 1 1 d . . .
H28A H 0.5952 1.2502 1.2083 0.057 Uiso 1 1 calc R . .
H28B H 0.6296 1.2435 1.2251 0.057 Uiso 1 1 calc R . .
H28C H 0.6172 1.2332 1.2937 0.057 Uiso 1 1 calc R . .
C218 C 0.75986(10) 1.23725(19) 1.3462(3) 0.0431(12) Uani 1 1 d . . .
H21A H 0.7807 1.2365 1.351 0.052 Uiso 1 1 calc R . .
H21B H 0.7593 1.2347 1.3997 0.052 Uiso 1 1 calc R . .
C29 C 0.71736(10) 1.30435(18) 1.3266(3) 0.0407(11) Uani 1 1 d . . .
H29A H 0.7234 1.3214 1.3788 0.049 Uiso 1 1 calc R . .
H29B H 0.705 1.3298 1.2873 0.049 Uiso 1 1 calc R . .
C30 C 0.73727(10) 1.2881(2) 1.2162(3) 0.0463(12) Uani 1 1 d . . .
H30A H 0.7369 1.3243 1.1952 0.056 Uiso 1 1 calc R . .
H30B H 0.7526 1.2676 1.2047 0.056 Uiso 1 1 calc R . .
C31 C 0.74553(9) 1.29102(19) 1.3077(3) 0.0406(11) Uani 1 1 d . . .
C32 C 0.76819(11) 1.3366(2) 1.3411(3) 0.0560(14) Uani 1 1 d . . .
H32A H 0.7852 1.3309 1.3257 0.084 Uiso 1 1 calc R . .
H32B H 0.7747 1.337 1.3984 0.084 Uiso 1 1 calc R . .
H32C H 0.7589 1.3705 1.3201 0.084 Uiso 1 1 calc R . .
C33 C 0.76072(10) 1.1539(2) 1.2860(3) 0.0464(12) Uani 1 1 d . . .
H33 H 0.7813 1.1593 1.3102 0.056 Uiso 1 1 calc R . .
C34 C 0.75152(10) 1.1051(2) 1.2392(3) 0.0463(12) Uani 1 1 d . . .
C35 C 0.77430(13) 1.0692(3) 1.2408(4) 0.082(2) Uani 1 1 d . . .
H35 H 0.7941 1.0777 1.2713 0.098 Uiso 1 1 calc R . .
C36 C 0.76817(13) 1.0222(3) 1.1988(5) 0.093(2) Uani 1 1 d . . .
H36 H 0.7837 0.9997 1.1984 0.112 Uiso 1 1 calc R . .
C37 C 0.73782(11) 1.0077(2) 1.1558(4) 0.0671(17) Uani 1 1 d . . .
H37 H 0.7333 0.9753 1.1277 0.081 Uiso 1 1 calc R . .
C38 C 0.71542(10) 1.04134(19) 1.1557(3) 0.0402(11) Uani 1 1 d . . .
C39 C 0.72140(10) 1.09148(19) 1.1973(3) 0.0384(11) Uani 1 1 d . . .
C40 C 0.67684(10) 0.98696(19) 1.0638(3) 0.0432(12) Uani 1 1 d . . .
H40A H 0.6859 0.991 1.0244 0.065 Uiso 1 1 calc R . .
H40B H 0.6554 0.9861 1.0379 0.065 Uiso 1 1 calc R . .
H40C H 0.6836 0.9539 1.0928 0.065 Uiso 1 1 calc R . .
C41 C 0.69369(9) 1.24728(17) 1.3899(2) 0.0320(9) Uani 1 1 d . . .
H41 H 0.7008 1.2729 1.4305 0.038 Uiso 1 1 calc R . .
C42 C 0.67719(9) 1.20214(16) 1.4046(2) 0.0303(9) Uani 1 1 d . . .
C43 C 0.67196(9) 1.20340(18) 1.4771(2) 0.0348(10) Uani 1 1 d . . .
H43 H 0.6797 1.2318 1.5126 0.042 Uiso 1 1 calc R . .
C44 C 0.65579(9) 1.16393(18) 1.4961(2) 0.0360(10) Uani 1 1 d . . .
H44 H 0.6529 1.1652 1.5446 0.043 Uiso 1 1 calc R . .
C45 C 0.64362(9) 1.12144(17) 1.4423(2) 0.0306(9) Uani 1 1 d . . .
H45 H 0.6319 1.0951 1.4539 0.037 Uiso 1 1 calc R . .
C46 C 0.64903(9) 1.11902(16) 1.3728(2) 0.0281(9) Uani 1 1 d . . .
C47 C 0.66603(8) 1.15862(16) 1.3520(2) 0.0266(9) Uani 1 1 d . . .
C48 C 0.62329(9) 1.03424(16) 1.3343(3) 0.0364(10) Uani 1 1 d . . .
H48A H 0.6372 1.0153 1.3792 0.055 Uiso 1 1 calc R . .
H48B H 0.6161 1.0104 1.289 0.055 Uiso 1 1 calc R . .
H48C H 0.6066 1.0466 1.3475 0.055 Uiso 1 1 calc R . .
C49 C 0.68982(10) 1.28741(18) 1.1142(3) 0.0385(11) Uani 1 1 d . . .
H49 H 0.6971 1.3188 1.0995 0.046 Uiso 1 1 calc R . .
C50 C 0.65992(10) 1.27281(18) 1.0659(3) 0.0380(10) Uani 1 1 d . . .
C51 C 0.64546(11) 1.30582(19) 0.9985(3) 0.0464(12) Uani 1 1 d . . .
H51 H 0.6557 1.3354 0.989 0.056 Uiso 1 1 calc R . .
C52 C 0.61663(11) 1.2953(2) 0.9465(3) 0.0527(14) Uani 1 1 d . . .
H52 H 0.6078 1.3171 0.9018 0.063 Uiso 1 1 calc R . .
C53 C 0.60049(10) 1.25140(18) 0.9611(3) 0.0420(11) Uani 1 1 d . . .
H53 H 0.5809 1.2443 0.9267 0.05 Uiso 1 1 calc R . .
C54 C 0.61421(9) 1.21908(16) 1.0274(2) 0.0317(9) Uani 1 1 d . . .
C55 C 0.64415(9) 1.22793(17) 1.0817(2) 0.0328(10) Uani 1 1 d . . .
C56 C 0.56953(9) 1.16691(19) 1.0039(3) 0.0407(11) Uani 1 1 d . . .
H56A H 0.5587 1.1979 1.0113 0.061 Uiso 1 1 calc R . .
H56B H 0.5629 1.1352 1.0236 0.061 Uiso 1 1 calc R . .
H56C H 0.5659 1.1625 0.948 0.061 Uiso 1 1 calc R . .
C101 C 0.60429(11) 0.3610(2) 0.1335(3) 0.0522(13) Uani 1 1 d . . .
H10A H 0.606 0.3563 0.0817 0.063 Uiso 1 1 calc R . .
H10B H 0.613 0.3294 0.1657 0.063 Uiso 1 1 calc R . .
C102 C 0.60382(11) 0.46273(19) 0.1395(3) 0.0521(13) Uani 1 1 d . . .
H10C H 0.6174 0.493 0.1466 0.062 Uiso 1 1 calc R . .
H10D H 0.593 0.4579 0.0825 0.062 Uiso 1 1 calc R . .
C103 C 0.63038(11) 0.4090(2) 0.2656(3) 0.0530(14) Uani 1 1 d . . .
H10E H 0.6481 0.3866 0.2891 0.064 Uiso 1 1 calc R . .
H10F H 0.6352 0.445 0.2879 0.064 Uiso 1 1 calc R . .
C104 C 0.62199(11) 0.41150(18) 0.1742(3) 0.0492(13) Uani 1 1 d . . .
C105 C 0.65131(12) 0.4140(2) 0.1577(4) 0.0646(16) Uani 1 1 d . . .
H10G H 0.6637 0.4427 0.1885 0.097 Uiso 1 1 calc R . .
H10H H 0.6468 0.4206 0.1018 0.097 Uiso 1 1 calc R . .
H10I H 0.6618 0.3803 0.1725 0.097 Uiso 1 1 calc R . .
C106 C 0.55368(12) 0.34718(18) 0.0554(3) 0.0478(13) Uani 1 1 d . . .
H106 H 0.5617 0.331 0.0208 0.057 Uiso 1 1 calc R . .
C107 C 0.52144(11) 0.35001(18) 0.0284(3) 0.0418(11) Uani 1 1 d . . .
C108 C 0.50511(13) 0.32452(18) -0.0470(3) 0.0496(13) Uani 1 1 d . . .
H108 H 0.5156 0.3053 -0.073 0.059 Uiso 1 1 calc R . .
C109 C 0.47474(14) 0.3280(2) -0.0811(3) 0.0551(14) Uani 1 1 d . . .
H109 H 0.4647 0.311 -0.1298 0.066 Uiso 1 1 calc R . .
C110 C 0.61250(8) 1.07658(16) 0.9659(2) 0.0257(8) Uani 1 1 d . . .
C11B C 0.45847(12) 0.3567(2) -0.0436(3) 0.0497(13) Uani 1 1 d . . .
H11B H 0.4377 0.3602 -0.0679 0.06 Uiso 1 1 calc R . .
C111 C 0.47379(11) 0.38015(18) 0.0311(3) 0.0400(11) Uani 1 1 d . . .
C112 C 0.50514(10) 0.37679(16) 0.0684(2) 0.0357(10) Uani 1 1 d . . .
C113 C 0.42999(11) 0.4224(2) 0.0390(3) 0.0553(14) Uani 1 1 d . . .
H11A H 0.4285 0.4473 -0.0033 0.083 Uiso 1 1 calc R . .
H11C H 0.4232 0.4396 0.0774 0.083 Uiso 1 1 calc R . .
H11D H 0.4177 0.3913 0.0172 0.083 Uiso 1 1 calc R . .
C114 C 0.58252(10) 0.52387(18) 0.2034(3) 0.0413(11) Uani 1 1 d . . .
H114 H 0.5948 0.5482 0.1901 0.05 Uiso 1 1 calc R . .
C115 C 0.56560(10) 0.54465(18) 0.2499(3) 0.0420(11) Uani 1 1 d . . .
C116 C 0.56827(11) 0.60100(19) 0.2671(3) 0.0490(13) Uani 1 1 d . . .
H116 H 0.5805 0.6222 0.2488 0.059 Uiso 1 1 calc R . .
C117 C 0.55314(12) 0.6242(2) 0.3101(3) 0.0548(14) Uani 1 1 d . . .
H117 H 0.5551 0.661 0.321 0.066 Uiso 1 1 calc R . .
C118 C 0.53475(11) 0.59309(18) 0.3377(3) 0.0466(12) Uani 1 1 d . . .
H118 H 0.5243 0.6092 0.3665 0.056 Uiso 1 1 calc R . .
C119 C 0.53203(10) 0.53895(18) 0.3225(3) 0.0378(10) Uani 1 1 d . . .
C120 C 0.54684(10) 0.51243(17) 0.2778(3) 0.0367(10) Uani 1 1 d . . .
C121 C 0.50275(11) 0.5225(2) 0.4040(3) 0.0480(12) Uani 1 1 d . . .
H12D H 0.5193 0.5341 0.4503 0.072 Uiso 1 1 calc R . .
H12E H 0.4924 0.4935 0.4184 0.072 Uiso 1 1 calc R . .
H12F H 0.4892 0.5522 0.3834 0.072 Uiso 1 1 calc R . .
C122 C 0.56053(10) 0.32347(16) 0.3360(2) 0.0312(9) Uani 1 1 d . . .
C123 C 0.59246(10) 0.31905(17) 0.3691(3) 0.0343(10) Uani 1 1 d . . .
C124 C 0.60584(11) 0.28248(18) 0.4320(3) 0.0417(11) Uani 1 1 d . . .
H124 H 0.6267 0.2795 0.4537 0.05 Uiso 1 1 calc R . .
C125 C 0.58879(11) 0.25111(18) 0.4620(3) 0.0434(11) Uani 1 1 d . . .
H125 H 0.598 0.227 0.5035 0.052 Uiso 1 1 calc R . .
C126 C 0.55764(10) 0.25541(17) 0.4304(2) 0.0390(11) Uani 1 1 d . . .
H126 H 0.5459 0.2344 0.4506 0.047 Uiso 1 1 calc R . .
C127 C 0.54426(9) 0.29135(16) 0.3684(2) 0.0314(9) Uani 1 1 d . . .
O19 O 0.51372(6) 0.30041(11) 0.33434(16) 0.0353(7) Uani 1 1 d . . .
C129 C 0.49363(10) 0.26198(17) 0.3480(3) 0.0419(11) Uani 1 1 d . . .
H12G H 0.4974 0.2268 0.3313 0.063 Uiso 1 1 calc R . .
H12H H 0.4733 0.2723 0.3178 0.063 Uiso 1 1 calc R . .
H12I H 0.4968 0.2612 0.4039 0.063 Uiso 1 1 calc R . .
N1 N 0.56141(7) 1.00673(13) 0.97199(18) 0.0275(7) Uani 1 1 d . . .
N2 N 0.60031(7) 0.92614(14) 1.07356(19) 0.0287(7) Uani 1 1 d . . .
N3 N 0.55985(7) 0.98507(13) 1.12729(19) 0.0278(7) Uani 1 1 d . . .
N4 N 0.74399(8) 1.19059(15) 1.2985(2) 0.0376(9) Uani 1 1 d . . .
N5 N 0.69952(8) 1.25553(14) 1.3263(2) 0.0344(8) Uani 1 1 d . . .
N6 N 0.70805(8) 1.26259(15) 1.1759(2) 0.0384(9) Uani 1 1 d . . .
N7 N 0.57278(9) 0.36468(15) 0.1228(2) 0.0409(9) Uani 1 1 d . . .
N8 N 0.58221(8) 0.47496(15) 0.1789(2) 0.0425(9) Uani 1 1 d . . .
N9 N 0.60536(9) 0.38651(15) 0.2862(2) 0.0440(10) Uani 1 1 d . . .
O1 O 0.61862(6) 1.06064(11) 1.04085(15) 0.0279(6) Uani 1 1 d . . .
O2 O 0.63714(6) 1.00901(11) 1.17483(15) 0.0283(6) Uani 1 1 d . . .
O3 O 0.59533(6) 1.08159(10) 1.14867(15) 0.0263(6) Uani 1 1 d . . .
O4 O 0.69830(6) 1.12259(11) 1.19194(16) 0.0310(6) Uani 1 1 d . . .
O5 O 0.67095(6) 1.15278(11) 1.28476(15) 0.0296(6) Uani 1 1 d . . .
O6 O 0.65548(6) 1.19598(11) 1.14307(15) 0.0303(6) Uani 1 1 d . . .
O7 O 0.65745(6) 1.12379(12) 1.01740(16) 0.0353(7) Uani 1 1 d . . .
O8 O 0.68753(6) 1.03329(12) 1.28694(16) 0.0366(7) Uani 1 1 d . . .
O9 O 0.60821(6) 1.17495(11) 1.21490(16) 0.0311(6) Uani 1 1 d . . .
O10 O 0.68524(6) 1.03136(12) 1.11800(17) 0.0360(7) Uani 1 1 d . . .
O11 O 0.63806(6) 1.07971(11) 1.31518(16) 0.0309(6) Uani 1 1 d . . .
O12 O 0.60124(6) 1.17459(11) 1.04712(16) 0.0331(7) Uani 1 1 d . . .
O13 O 0.51755(7) 0.39985(11) 0.13920(17) 0.0360(7) Uani 1 1 d . . .
O14 O 0.54269(6) 0.46058(11) 0.26514(17) 0.0352(7) Uani 1 1 d . . .
O16 O 0.54615(6) 0.35657(11) 0.27706(16) 0.0330(7) Uani 1 1 d . . .
O17 O 0.51369(7) 0.50423(11) 0.34386(17) 0.0392(7) Uani 1 1 d . . .
O18 O 0.46044(7) 0.40605(12) 0.07722(18) 0.0423(8) Uani 1 1 d . . .
Co1 Co 0.594234(11) 1.00984(2) 1.08749(3) 0.02437(12) Uani 1 1 d . . .
Co2 Co 0.697122(12) 1.19867(2) 1.23744(3) 0.03002(13) Uani 1 1 d . . .
Co3 Co 0.562318(13) 0.40749(2) 0.21026(4) 0.03448(14) Uani 1 1 d . . .
Tb1 Tb 0.646332(4) 1.102795(8) 1.165358(12) 0.02962(6) Uani 1 1 d . . .
Tb2 Tb 0.5 0.405651(12) 0.25 0.03507(8) Uani 1 2 d S . .
C130 C 0.61281(11) 0.34938(18) 0.3415(3) 0.0428(11) Uani 1 1 d . . .
H130 H 0.6332 0.3415 0.3657 0.051 Uiso 1 1 calc R . .
O20 O 0.5 0.0326(2) 0.75 0.0470(11) Uani 1 2 d S . .
N20 N 0.5 0.0830(3) 0.75 0.0438(13) Uani 1 2 d S . .
O21 O 0.49486(10) 0.10785(16) 0.6866(2) 0.0723(11) Uani 1 1 d . . .
O23 O 0.84079(15) 0.1612(3) 0.3956(4) 0.154(2) Uiso 1 1 d . . .
N21 N 0.8555(3) 0.1022(5) 0.3934(8) 0.190(4) Uiso 1 1 d . . .
O24 O 0.8728(2) 0.1238(4) 0.3521(6) 0.210(3) Uiso 1 1 d . . .
O22 O 0.8458(3) 0.0917(6) 0.4505(10) 0.329(7) Uiso 1 1 d . . .
 
loop_
    _atom_site_aniso_label
    _atom_site_aniso_U_11
    _atom_site_aniso_U_22
    _atom_site_aniso_U_33
    _atom_site_aniso_U_23
    _atom_site_aniso_U_13
    _atom_site_aniso_U_12
C1 0.027(2) 0.038(2) 0.023(2) -0.0033(18) 0.0042(17) -0.0069(18)
C2 0.032(2) 0.033(2) 0.028(2) -0.0095(18) 0.0070(18) -0.0040(19)
C3 0.029(2) 0.038(2) 0.027(2) -0.0062(18) 0.0121(18) -0.0089(18)
C4 0.025(2) 0.032(2) 0.025(2) -0.0073(17) 0.0084(17) -0.0041(17)
C5 0.044(3) 0.041(3) 0.037(3) -0.007(2) 0.013(2) -0.010(2)
C6 0.030(2) 0.039(2) 0.019(2) -0.0028(18) -0.0006(17) 0.0067(19)
C7 0.032(2) 0.032(2) 0.019(2) -0.0038(16) 0.0087(17) 0.0011(18)
C8 0.032(2) 0.048(3) 0.019(2) -0.0009(19) 0.0029(18) 0.003(2)
C9 0.047(3) 0.053(3) 0.021(2) 0.005(2) 0.017(2) -0.003(2)
C10 0.040(3) 0.045(3) 0.028(2) 0.004(2) 0.017(2) -0.003(2)
C11 0.035(2) 0.036(2) 0.026(2) -0.0018(18) 0.0113(19) -0.0014(19)
C12 0.040(3) 0.061(3) 0.038(3) -0.001(2) 0.017(2) -0.012(2)
C13 0.036(2) 0.026(2) 0.031(2) -0.0030(17) 0.0184(19) 0.0018(18)
C14 0.030(2) 0.032(2) 0.027(2) 0.0019(17) 0.0137(18) 0.0048(17)
C15 0.034(2) 0.034(2) 0.041(3) 0.003(2) 0.016(2) 0.005(2)
C16 0.036(3) 0.040(3) 0.038(3) 0.011(2) 0.012(2) 0.013(2)
C17 0.028(2) 0.046(3) 0.034(3) 0.004(2) 0.0044(19) 0.005(2)
C18 0.028(2) 0.036(2) 0.027(2) 0.0022(18) 0.0078(18) 0.0006(18)
C19 0.026(2) 0.036(2) 0.024(2) 0.0013(18) 0.0105(17) 0.0018(18)
C20 0.042(3) 0.051(3) 0.032(3) -0.003(2) -0.001(2) -0.004(2)
C21 0.024(2) 0.031(2) 0.024(2) 0.0008(17) 0.0065(17) -0.0030(17)
C22 0.028(2) 0.029(2) 0.023(2) -0.0009(17) 0.0071(17) 0.0035(17)
C23 0.029(2) 0.038(3) 0.031(2) 0.0018(18) 0.0113(19) 0.0037(18)
C24 0.040(3) 0.034(2) 0.030(2) -0.0003(18) 0.017(2) 0.007(2)
C25 0.040(3) 0.032(2) 0.027(2) -0.0045(18) 0.0125(19) 0.0013(19)
C26 0.026(2) 0.025(2) 0.027(2) 0.0034(16) 0.0048(17) 0.0024(17)
C27 0.0219(19) 0.025(2) 0.0179(19) 0.0012(15) 0.0068(15) 0.0046(16)
C28 0.046(3) 0.024(2) 0.043(3) -0.0024(19) 0.016(2) 0.000(2)
C218 0.034(3) 0.051(3) 0.035(3) 0.002(2) 0.002(2) -0.013(2)
C29 0.040(3) 0.036(3) 0.039(3) 0.001(2) 0.005(2) -0.009(2)
C30 0.040(3) 0.047(3) 0.050(3) 0.000(2) 0.013(2) -0.019(2)
C31 0.033(2) 0.045(3) 0.037(3) 0.004(2) 0.006(2) -0.012(2)
C32 0.050(3) 0.053(3) 0.053(3) 0.007(3) 0.006(2) -0.019(3)
C33 0.026(2) 0.055(3) 0.049(3) 0.001(2) 0.003(2) -0.005(2)
C34 0.028(2) 0.047(3) 0.057(3) -0.002(2) 0.008(2) -0.001(2)
C35 0.038(3) 0.071(4) 0.123(6) -0.024(4) 0.011(3) -0.002(3)
C36 0.039(3) 0.070(5) 0.155(7) -0.022(5) 0.017(4) 0.005(3)
C37 0.040(3) 0.049(3) 0.099(5) -0.018(3) 0.009(3) 0.004(3)
C38 0.031(3) 0.043(3) 0.043(3) -0.001(2) 0.011(2) -0.002(2)
C39 0.031(2) 0.048(3) 0.035(3) 0.001(2) 0.010(2) -0.004(2)
C40 0.043(3) 0.048(3) 0.040(3) -0.016(2) 0.018(2) -0.005(2)
C41 0.030(2) 0.036(2) 0.027(2) -0.0032(18) 0.0064(18) -0.0049(18)
C42 0.029(2) 0.034(2) 0.023(2) 0.0006(17) 0.0037(17) -0.0090(18)
C43 0.032(2) 0.042(3) 0.024(2) -0.0048(19) 0.0029(18) -0.001(2)
C44 0.041(3) 0.043(3) 0.023(2) 0.0014(19) 0.0108(19) 0.001(2)
C45 0.030(2) 0.038(2) 0.023(2) 0.0050(18) 0.0095(18) 0.0007(18)
C46 0.031(2) 0.031(2) 0.018(2) 0.0039(16) 0.0039(17) 0.0015(18)
C47 0.027(2) 0.030(2) 0.022(2) 0.0017(16) 0.0073(17) 0.0009(17)
C48 0.040(3) 0.029(2) 0.037(3) 0.0027(19) 0.010(2) -0.0077(19)
C49 0.044(3) 0.037(3) 0.036(3) 0.006(2) 0.017(2) -0.009(2)
C50 0.038(3) 0.042(3) 0.033(3) 0.007(2) 0.012(2) -0.003(2)
C51 0.052(3) 0.041(3) 0.039(3) 0.014(2) 0.008(2) -0.001(2)
C52 0.054(3) 0.051(3) 0.040(3) 0.024(2) 0.001(2) -0.001(3)
C53 0.042(3) 0.043(3) 0.034(3) 0.006(2) 0.006(2) 0.005(2)
C54 0.039(2) 0.027(2) 0.028(2) 0.0002(17) 0.0103(19) 0.0022(19)
C55 0.032(2) 0.035(2) 0.029(2) 0.0045(18) 0.0083(19) 0.0027(19)
C56 0.029(2) 0.048(3) 0.040(3) 0.002(2) 0.007(2) -0.002(2)
C101 0.063(3) 0.038(3) 0.066(4) 0.010(2) 0.037(3) 0.005(2)
C102 0.064(3) 0.037(3) 0.062(4) 0.011(2) 0.032(3) 0.000(2)
C103 0.046(3) 0.052(3) 0.066(4) 0.013(3) 0.027(3) 0.002(2)
C104 0.053(3) 0.031(3) 0.071(4) 0.010(2) 0.032(3) 0.000(2)
C105 0.059(4) 0.064(4) 0.082(4) 0.008(3) 0.039(3) -0.003(3)
C106 0.080(4) 0.028(2) 0.046(3) 0.004(2) 0.035(3) 0.008(2)
C107 0.058(3) 0.030(2) 0.038(3) 0.003(2) 0.018(2) -0.004(2)
C108 0.086(4) 0.031(3) 0.035(3) -0.001(2) 0.025(3) -0.003(3)
C109 0.088(4) 0.044(3) 0.027(3) -0.008(2) 0.014(3) -0.012(3)
C110 0.029(2) 0.027(2) 0.022(2) 0.0004(16) 0.0103(17) 0.0050(17)
C11B 0.065(3) 0.044(3) 0.032(3) 0.002(2) 0.007(2) -0.012(3)
C111 0.060(3) 0.030(2) 0.026(2) 0.0056(19) 0.012(2) -0.004(2)
C112 0.056(3) 0.021(2) 0.025(2) 0.0054(17) 0.009(2) -0.004(2)
C113 0.055(3) 0.051(3) 0.046(3) 0.006(2) 0.001(3) 0.007(3)
C114 0.047(3) 0.031(2) 0.043(3) 0.009(2) 0.013(2) -0.005(2)
C115 0.050(3) 0.027(2) 0.041(3) 0.004(2) 0.008(2) -0.002(2)
C116 0.053(3) 0.034(3) 0.055(3) -0.002(2) 0.014(3) -0.010(2)
C117 0.066(4) 0.028(3) 0.059(3) -0.012(2) 0.010(3) -0.008(2)
C118 0.053(3) 0.031(3) 0.048(3) -0.008(2) 0.011(2) -0.005(2)
C119 0.041(3) 0.032(2) 0.032(2) -0.0026(19) 0.002(2) -0.002(2)
C120 0.039(3) 0.028(2) 0.034(3) -0.0027(18) 0.003(2) 0.0003(19)
C121 0.063(3) 0.041(3) 0.036(3) -0.009(2) 0.014(2) -0.004(2)
C122 0.046(3) 0.022(2) 0.026(2) -0.0003(17) 0.014(2) 0.0054(19)
C123 0.044(3) 0.028(2) 0.031(2) -0.0017(18) 0.013(2) 0.0024(19)
C124 0.045(3) 0.040(3) 0.034(3) 0.003(2) 0.007(2) 0.004(2)
C125 0.051(3) 0.036(3) 0.034(3) 0.009(2) 0.005(2) 0.008(2)
C126 0.053(3) 0.029(2) 0.031(2) 0.0064(19) 0.011(2) -0.003(2)
C127 0.040(3) 0.024(2) 0.027(2) -0.0020(17) 0.0075(19) 0.0037(18)
O19 0.0459(19) 0.0262(16) 0.0319(16) 0.0055(12) 0.0117(14) -0.0005(13)
C129 0.051(3) 0.024(2) 0.050(3) 0.001(2) 0.018(2) -0.005(2)
N1 0.0260(18) 0.0341(19) 0.0197(18) -0.0010(14) 0.0050(14) -0.0003(15)
N2 0.0253(18) 0.0333(19) 0.0266(19) -0.0087(15) 0.0083(15) 0.0005(15)
N3 0.0314(19) 0.0277(18) 0.0237(18) -0.0024(14) 0.0094(15) 0.0011(15)
N4 0.036(2) 0.040(2) 0.030(2) 0.0020(16) 0.0038(16) -0.0080(18)
N5 0.036(2) 0.0293(19) 0.032(2) 0.0015(15) 0.0066(16) -0.0069(16)
N6 0.036(2) 0.043(2) 0.034(2) 0.0054(17) 0.0096(17) -0.0079(17)
N7 0.053(3) 0.031(2) 0.044(2) 0.0054(18) 0.024(2) 0.0038(18)
N8 0.052(2) 0.032(2) 0.047(2) 0.0044(18) 0.0215(19) 0.0022(18)
N9 0.048(2) 0.038(2) 0.044(2) 0.0054(18) 0.0142(19) -0.0014(18)
O1 0.0271(15) 0.0331(16) 0.0219(14) 0.0011(12) 0.0070(12) 0.0000(12)
O2 0.0256(14) 0.0301(15) 0.0242(15) 0.0014(12) 0.0031(12) 0.0031(12)
O3 0.0283(15) 0.0275(14) 0.0222(14) -0.0018(11) 0.0082(12) -0.0010(12)
O4 0.0285(15) 0.0349(16) 0.0273(16) -0.0020(12) 0.0074(12) -0.0007(13)
O5 0.0306(15) 0.0309(15) 0.0249(15) 0.0001(12) 0.0074(12) -0.0083(12)
O6 0.0301(15) 0.0349(16) 0.0227(15) 0.0058(12) 0.0060(12) -0.0022(12)
O7 0.0315(16) 0.0463(18) 0.0260(16) -0.0015(13) 0.0080(13) -0.0106(14)
O8 0.0314(16) 0.0381(18) 0.0307(17) -0.0021(13) 0.0000(13) -0.0009(13)
O9 0.0351(16) 0.0277(15) 0.0321(16) -0.0028(12) 0.0140(13) -0.0042(12)
O10 0.0296(16) 0.0392(17) 0.0344(17) -0.0084(13) 0.0060(13) -0.0013(13)
O11 0.0346(16) 0.0311(16) 0.0254(15) -0.0010(12) 0.0090(12) -0.0091(13)
O12 0.0320(16) 0.0334(16) 0.0291(16) 0.0019(12) 0.0054(12) -0.0001(13)
O13 0.0500(19) 0.0274(16) 0.0275(16) 0.0010(12) 0.0105(14) 0.0015(13)
O14 0.0451(18) 0.0216(15) 0.0379(18) -0.0009(12) 0.0139(14) -0.0010(13)
O16 0.0405(17) 0.0262(15) 0.0300(16) 0.0071(12) 0.0101(13) 0.0049(13)
O17 0.0524(19) 0.0287(16) 0.0352(18) -0.0043(13) 0.0143(15) -0.0014(14)
O18 0.048(2) 0.0390(18) 0.0334(18) 0.0019(14) 0.0076(15) -0.0001(15)
Co1 0.0240(3) 0.0273(3) 0.0202(3) -0.0019(2) 0.0062(2) -0.0006(2)
Co2 0.0288(3) 0.0330(3) 0.0250(3) 0.0026(2) 0.0059(2) -0.0060(2)
Co3 0.0439(4) 0.0255(3) 0.0338(3) 0.0030(2) 0.0139(3) 0.0002(3)
Tb1 0.02764(11) 0.03250(12) 0.02576(11) -0.00278(8) 0.00624(8) -0.00553(9)
Tb2 0.04067(18) 0.02991(17) 0.03309(18) 0 0.01159(14) 0
C130 0.044(3) 0.037(3) 0.043(3) -0.004(2) 0.011(2) 0.000(2)
O20 0.039(3) 0.049(3) 0.048(3) 0 0.011(2) 0
N20 0.039(3) 0.053(4) 0.040(4) 0 0.016(3) 0
O21 0.102(3) 0.066(3) 0.061(3) 0.010(2) 0.045(2) -0.006(2)
 
 
#----------------------------------------------------------------------------#
#                   MOLECULAR GEOMETRY                                       #
#----------------------------------------------------------------------------#
 
_geom_special_details
;
 All esds (except the esd in the dihedral angle between two l.s. planes)
 are estimated using the full covariance matrix.  The cell esds are taken
 into account individually in the estimation of esds in distances, angles
 and torsion angles; correlations between esds in cell parameters are only
 used when they are defined by crystal symmetry.  An approximate (isotropic)
 treatment of cell esds is used for estimating esds involving l.s. planes.
;
loop_
    _geom_bond_atom_site_label_1
    _geom_bond_atom_site_label_2
    _geom_bond_distance
    _geom_bond_site_symmetry_2
    _geom_bond_publ_flag
C1 N1 1.462(5) . ?
C1 C4 1.553(6) . ?
C2 N2 1.469(5) . ?
C2 C4 1.543(5) . ?
C3 N3 1.485(5) . ?
C3 C4 1.542(5) . ?
C4 C5 1.517(5) . ?
C6 N1 1.284(5) . ?
C6 C7 1.443(6) . ?
C7 C110 1.403(5) . ?
C7 C8 1.415(5) . ?
C8 C9 1.360(6) . ?
C9 C10 1.402(6) . ?
C10 C11 1.382(6) . ?
C11 O7 1.359(5) . ?
C11 C110 1.412(6) . ?
C12 O7 1.426(5) . ?
C13 N2 1.289(5) . ?
C13 C14 1.432(6) . ?
C14 C19 1.415(6) . ?
C14 C15 1.420(6) . ?
C15 C16 1.369(6) . ?
C16 C17 1.405(6) . ?
C17 C18 1.359(6) . ?
C18 O8 1.369(5) . ?
C18 C19 1.440(5) . ?
C19 O2 1.309(5) . ?
C20 O8 1.425(5) . ?
C21 N3 1.275(5) . ?
C21 C22 1.454(5) . ?
C22 C23 1.400(5) . ?
C22 C27 1.414(5) . ?
C23 C24 1.370(6) . ?
C24 C25 1.384(6) . ?
C25 C26 1.382(5) . ?
C26 O9 1.370(4) . ?
C26 C27 1.396(5) . ?
C27 O3 1.316(4) . ?
C28 O9 1.412(5) . ?
C218 N4 1.473(5) . ?
C218 C31 1.541(6) . ?
C29 N5 1.478(5) . ?
C29 C31 1.540(6) . ?
C30 N6 1.461(5) . ?
C30 C31 1.545(6) . ?
C31 C32 1.526(6) . ?
C33 N4 1.282(6) . ?
C33 C34 1.446(7) . ?
C34 C35 1.397(7) . ?
C34 C39 1.400(6) . ?
C35 C36 1.359(8) . ?
C36 C37 1.418(7) . ?
C37 C38 1.355(6) . ?
C38 O10 1.374(5) . ?
C38 C39 1.423(6) . ?
C39 O4 1.320(5) . ?
C40 O10 1.424(5) . ?
C41 N5 1.286(5) . ?
C41 C42 1.446(5) . ?
C42 C47 1.403(5) . ?
C42 C43 1.411(6) . ?
C43 C44 1.364(6) . ?
C44 C45 1.403(6) . ?
C45 C46 1.364(5) . ?
C46 O11 1.377(5) . ?
C46 C47 1.408(5) . ?
C47 O5 1.319(4) . ?
C48 O11 1.435(4) . ?
C49 N6 1.287(5) . ?
C49 C50 1.422(6) . ?
C50 C51 1.414(6) . ?
C50 C55 1.427(6) . ?
C51 C52 1.378(6) . ?
C52 C53 1.410(6) . ?
C53 C54 1.384(6) . ?
C54 O12 1.372(5) . ?
C54 C55 1.424(6) . ?
C55 O6 1.302(5) . ?
C56 O12 1.441(5) . ?
C101 N7 1.450(6) . ?
C101 C104 1.537(7) . ?
C102 N8 1.480(6) . ?
C102 C104 1.535(6) . ?
C103 N9 1.483(6) . ?
C103 C104 1.541(7) . ?
C104 C105 1.536(7) . ?
C106 N7 1.295(6) . ?
C106 C107 1.439(7) . ?
C107 C112 1.404(6) . ?
C107 C108 1.438(6) . ?
C108 C109 1.357(7) . ?
C109 C11B 1.395(7) . ?
C110 O1 1.328(4) . ?
C11B C111 1.397(6) . ?
C111 O18 1.374(5) . ?
C111 C112 1.403(6) . ?
C112 O13 1.319(5) . ?
C113 O18 1.422(5) . ?
C114 N8 1.287(5) . ?
C114 C115 1.451(6) . ?
C115 C120 1.421(6) . ?
C115 C116 1.424(6) . ?
C116 C117 1.361(7) . ?
C117 C118 1.388(7) . ?
C118 C119 1.364(6) . ?
C119 O17 1.378(5) . ?
C119 C120 1.409(6) . ?
C120 O14 1.306(5) . ?
C121 O17 1.432(5) . ?
C122 O16 1.316(5) . ?
C122 C127 1.381(6) . ?
C122 C123 1.425(6) . ?
C123 C124 1.406(6) . ?
C123 C130 1.451(6) . ?
C124 C125 1.370(6) . ?
C125 C126 1.391(6) . ?
C126 C127 1.385(5) . ?
C127 O19 1.380(5) . ?
O19 C129 1.434(5) . ?
N1 Co1 2.095(3) . ?
N2 Co1 2.119(3) . ?
N3 Co1 2.108(3) . ?
N4 Co2 2.114(4) . ?
N5 Co2 2.098(4) . ?
N6 Co2 2.101(3) . ?
N7 Co3 2.099(4) . ?
N8 Co3 2.097(4) . ?
N9 C130 1.303(6) . ?
N9 Co3 2.077(4) . ?
O1 Co1 2.086(3) . ?
O1 Tb1 2.382(3) . ?
O2 Co1 2.078(2) . ?
O2 Tb1 2.380(3) . ?
O3 Co1 2.078(3) . ?
O3 Tb1 2.403(2) . ?
O4 Co2 2.061(3) . ?
O4 Tb1 2.403(3) . ?
O5 Co2 2.086(3) . ?
O5 Tb1 2.380(3) . ?
O6 Co2 2.092(3) . ?
O6 Tb1 2.408(3) . ?
O8 Tb1 2.909(3) . ?
O9 Tb1 2.912(3) . ?
O10 Tb1 2.908(3) . ?
O11 Tb1 2.913(3) . ?
O13 Co3 2.062(3) . ?
O13 Tb2 2.427(3) . ?
O14 Co3 2.062(3) . ?
O14 Tb2 2.383(3) . ?
O16 Co3 2.073(3) . ?
O16 Tb2 2.407(3) . ?
O17 Tb2 2.900(3) . ?
Co1 Tb1 3.3027(5) . ?
Co2 Tb1 3.3024(6) . ?
Co3 Tb2 3.3064(6) . ?
Tb2 O14 2.383(3) 6_656 ?
Tb2 O16 2.407(3) 6_656 ?
Tb2 O13 2.427(3) 6_656 ?
Tb2 O17 2.900(3) 6_656 ?
Tb2 Co3 3.3064(6) 6_656 ?
O20 N20 1.249(7) . ?
N20 O21 1.236(5) 6_657 ?
N20 O21 1.236(5) . ?
O23 N21 1.626(11) . ?
N21 O22 1.296(17) . ?
N21 O24 1.403(13) . ?
 
loop_
    _geom_angle_atom_site_label_1
    _geom_angle_atom_site_label_2
    _geom_angle_atom_site_label_3
    _geom_angle
    _geom_angle_site_symmetry_1
    _geom_angle_site_symmetry_3
    _geom_angle_publ_flag
N1 C1 C4 112.4(3) . . ?
N2 C2 C4 111.9(3) . . ?
N3 C3 C4 110.8(3) . . ?
C5 C4 C3 107.8(3) . . ?
C5 C4 C2 109.6(3) . . ?
C3 C4 C2 110.3(3) . . ?
C5 C4 C1 107.8(3) . . ?
C3 C4 C1 111.1(3) . . ?
C2 C4 C1 110.1(3) . . ?
N1 C6 C7 127.5(4) . . ?
C110 C7 C8 119.0(4) . . ?
C110 C7 C6 124.7(4) . . ?
C8 C7 C6 116.4(4) . . ?
C9 C8 C7 121.5(4) . . ?
C8 C9 C10 120.1(4) . . ?
C11 C10 C9 119.5(4) . . ?
O7 C11 C10 124.9(4) . . ?
O7 C11 C110 113.7(3) . . ?
C10 C11 C110 121.3(4) . . ?
N2 C13 C14 127.9(4) . . ?
C19 C14 C15 119.3(4) . . ?
C19 C14 C13 123.9(4) . . ?
C15 C14 C13 116.8(4) . . ?
C16 C15 C14 121.4(4) . . ?
C15 C16 C17 119.6(4) . . ?
C18 C17 C16 120.6(4) . . ?
C17 C18 O8 126.3(4) . . ?
C17 C18 C19 121.5(4) . . ?
O8 C18 C19 112.2(3) . . ?
O2 C19 C14 124.2(4) . . ?
O2 C19 C18 118.4(4) . . ?
C14 C19 C18 117.4(4) . . ?
N3 C21 C22 127.7(4) . . ?
C23 C22 C27 119.3(4) . . ?
C23 C22 C21 116.9(4) . . ?
C27 C22 C21 123.8(3) . . ?
C24 C23 C22 121.4(4) . . ?
C23 C24 C25 120.0(4) . . ?
C26 C25 C24 119.3(4) . . ?
O9 C26 C25 124.5(4) . . ?
O9 C26 C27 113.1(3) . . ?
C25 C26 C27 122.4(4) . . ?
O3 C27 C26 118.8(3) . . ?
O3 C27 C22 123.6(3) . . ?
C26 C27 C22 117.7(3) . . ?
N4 C218 C31 111.4(3) . . ?
N5 C29 C31 111.9(4) . . ?
N6 C30 C31 112.0(3) . . ?
C32 C31 C29 107.9(4) . . ?
C32 C31 C218 109.1(4) . . ?
C29 C31 C218 111.5(4) . . ?
C32 C31 C30 108.8(4) . . ?
C29 C31 C30 109.9(4) . . ?
C218 C31 C30 109.6(4) . . ?
N4 C33 C34 128.1(4) . . ?
C35 C34 C39 120.0(5) . . ?
C35 C34 C33 116.7(4) . . ?
C39 C34 C33 123.2(4) . . ?
C36 C35 C34 121.6(5) . . ?
C35 C36 C37 119.3(6) . . ?
C38 C37 C36 119.8(5) . . ?
C37 C38 O10 125.3(4) . . ?
C37 C38 C39 121.8(4) . . ?
O10 C38 C39 112.9(4) . . ?
O4 C39 C34 124.6(4) . . ?
O4 C39 C38 117.9(4) . . ?
C34 C39 C38 117.5(4) . . ?
N5 C41 C42 126.4(4) . . ?
C47 C42 C43 119.0(4) . . ?
C47 C42 C41 124.7(4) . . ?
C43 C42 C41 116.3(4) . . ?
C44 C43 C42 121.5(4) . . ?
C43 C44 C45 119.7(4) . . ?
C46 C45 C44 119.5(4) . . ?
C45 C46 O11 124.8(4) . . ?
C45 C46 C47 122.2(4) . . ?
O11 C46 C47 113.0(3) . . ?
O5 C47 C42 123.3(3) . . ?
O5 C47 C46 118.6(3) . . ?
C42 C47 C46 118.1(4) . . ?
N6 C49 C50 128.1(4) . . ?
C51 C50 C49 116.4(4) . . ?
C51 C50 C55 119.4(4) . . ?
C49 C50 C55 124.3(4) . . ?
C52 C51 C50 121.7(4) . . ?
C51 C52 C53 120.0(4) . . ?
C54 C53 C52 119.0(4) . . ?
O12 C54 C53 124.6(4) . . ?
O12 C54 C55 112.5(3) . . ?
C53 C54 C55 122.8(4) . . ?
O6 C55 C54 119.3(4) . . ?
O6 C55 C50 123.6(4) . . ?
C54 C55 C50 117.1(4) . . ?
N7 C101 C104 112.1(4) . . ?
N8 C102 C104 111.4(4) . . ?
N9 C103 C104 111.1(4) . . ?
C102 C104 C105 108.0(4) . . ?
C102 C104 C101 110.3(4) . . ?
C105 C104 C101 108.9(4) . . ?
C102 C104 C103 110.8(4) . . ?
C105 C104 C103 107.8(4) . . ?
C101 C104 C103 111.0(4) . . ?
N7 C106 C107 127.0(4) . . ?
C112 C107 C108 118.5(5) . . ?
C112 C107 C106 125.2(4) . . ?
C108 C107 C106 116.3(4) . . ?
C109 C108 C107 121.4(5) . . ?
C108 C109 C11B 120.5(4) . . ?
O1 C110 C7 123.8(4) . . ?
O1 C110 C11 117.6(3) . . ?
C7 C110 C11 118.6(4) . . ?
C109 C11B C111 119.0(5) . . ?
O18 C111 C11B 125.1(4) . . ?
O18 C111 C112 113.0(4) . . ?
C11B C111 C112 121.9(5) . . ?
O13 C112 C111 117.4(4) . . ?
O13 C112 C107 123.9(4) . . ?
C111 C112 C107 118.6(4) . . ?
N8 C114 C115 126.2(4) . . ?
C120 C115 C116 119.4(4) . . ?
C120 C115 C114 124.0(4) . . ?
C116 C115 C114 116.6(4) . . ?
C117 C116 C115 120.8(5) . . ?
C116 C117 C118 120.3(5) . . ?
C119 C118 C117 120.0(5) . . ?
C118 C119 O17 125.5(4) . . ?
C118 C119 C120 122.7(5) . . ?
O17 C119 C120 111.7(4) . . ?
O14 C120 C119 118.7(4) . . ?
O14 C120 C115 124.4(4) . . ?
C119 C120 C115 116.8(4) . . ?
O16 C122 C127 119.2(4) . . ?
O16 C122 C123 123.3(4) . . ?
C127 C122 C123 117.5(4) . . ?
C124 C123 C122 119.3(4) . . ?
C124 C123 C130 116.2(4) . . ?
C122 C123 C130 124.5(4) . . ?
C125 C124 C123 121.2(4) . . ?
C124 C125 C126 119.9(4) . . ?
C127 C126 C125 119.3(4) . . ?
O19 C127 C122 112.8(3) . . ?
O19 C127 C126 124.4(4) . . ?
C122 C127 C126 122.8(4) . . ?
C127 O19 C129 118.8(3) . . ?
C6 N1 C1 115.9(3) . . ?
C6 N1 Co1 126.8(3) . . ?
C1 N1 Co1 116.6(2) . . ?
C13 N2 C2 116.5(3) . . ?
C13 N2 Co1 125.1(3) . . ?
C2 N2 Co1 116.0(2) . . ?
C21 N3 C3 115.4(3) . . ?
C21 N3 Co1 126.7(3) . . ?
C3 N3 Co1 117.0(2) . . ?
C33 N4 C218 115.8(4) . . ?
C33 N4 Co2 125.9(3) . . ?
C218 N4 Co2 116.8(3) . . ?
C41 N5 C29 115.9(4) . . ?
C41 N5 Co2 126.7(3) . . ?
C29 N5 Co2 115.1(3) . . ?
C49 N6 C30 116.4(4) . . ?
C49 N6 Co2 126.2(3) . . ?
C30 N6 Co2 116.2(3) . . ?
C106 N7 C101 116.5(4) . . ?
C106 N7 Co3 126.0(3) . . ?
C101 N7 Co3 116.9(3) . . ?
C114 N8 C102 115.7(4) . . ?
C114 N8 Co3 127.4(3) . . ?
C102 N8 Co3 115.4(3) . . ?
C130 N9 C103 115.6(4) . . ?
C130 N9 Co3 127.3(3) . . ?
C103 N9 Co3 116.0(3) . . ?
C110 O1 Co1 129.5(2) . . ?
C110 O1 Tb1 131.4(2) . . ?
Co1 O1 Tb1 95.09(10) . . ?
C19 O2 Co1 130.0(2) . . ?
C19 O2 Tb1 133.5(2) . . ?
Co1 O2 Tb1 95.37(10) . . ?
C27 O3 Co1 130.7(2) . . ?
C27 O3 Tb1 130.6(2) . . ?
Co1 O3 Tb1 94.67(10) . . ?
C39 O4 Co2 130.3(3) . . ?
C39 O4 Tb1 132.2(3) . . ?
Co2 O4 Tb1 95.12(10) . . ?
C47 O5 Co2 130.3(2) . . ?
C47 O5 Tb1 133.3(2) . . ?
Co2 O5 Tb1 95.15(10) . . ?
C55 O6 Co2 130.1(3) . . ?
C55 O6 Tb1 132.6(3) . . ?
Co2 O6 Tb1 94.18(10) . . ?
C11 O7 C12 116.8(3) . . ?
C18 O8 C20 116.5(3) . . ?
C18 O8 Tb1 115.0(2) . . ?
C20 O8 Tb1 128.4(3) . . ?
C26 O9 C28 117.7(3) . . ?
C26 O9 Tb1 113.3(2) . . ?
C28 O9 Tb1 128.6(2) . . ?
C38 O10 C40 117.3(3) . . ?
C38 O10 Tb1 114.5(2) . . ?
C40 O10 Tb1 128.1(2) . . ?
C46 O11 C48 117.4(3) . . ?
C46 O11 Tb1 114.3(2) . . ?
C48 O11 Tb1 128.2(2) . . ?
C54 O12 C56 116.9(3) . . ?
C112 O13 Co3 129.5(3) . . ?
C112 O13 Tb2 130.2(3) . . ?
Co3 O13 Tb2 94.52(11) . . ?
C120 O14 Co3 130.0(3) . . ?
C120 O14 Tb2 130.5(3) . . ?
Co3 O14 Tb2 95.85(10) . . ?
C122 O16 Co3 130.3(3) . . ?
C122 O16 Tb2 130.4(2) . . ?
Co3 O16 Tb2 94.82(10) . . ?
C119 O17 C121 117.2(3) . . ?
C119 O17 Tb2 113.2(2) . . ?
C121 O17 Tb2 129.5(3) . . ?
C111 O18 C113 117.4(4) . . ?
O2 Co1 O3 77.43(10) . . ?
O2 Co1 O1 76.48(10) . . ?
O3 Co1 O1 77.69(10) . . ?
O2 Co1 N1 157.30(12) . . ?
O3 Co1 N1 114.79(12) . . ?
O1 Co1 N1 87.23(11) . . ?
O2 Co1 N3 114.75(11) . . ?
O3 Co1 N3 86.68(11) . . ?
O1 Co1 N3 158.44(12) . . ?
N1 Co1 N3 85.95(12) . . ?
O2 Co1 N2 86.51(11) . . ?
O3 Co1 N2 156.84(12) . . ?
O1 Co1 N2 114.91(11) . . ?
N1 Co1 N2 86.15(13) . . ?
N3 Co1 N2 85.01(12) . . ?
O2 Co1 Tb1 45.84(7) . . ?
O3 Co1 Tb1 46.49(7) . . ?
O1 Co1 Tb1 45.93(7) . . ?
N1 Co1 Tb1 128.39(9) . . ?
N3 Co1 Tb1 128.32(9) . . ?
N2 Co1 Tb1 128.03(9) . . ?
O4 Co2 O5 76.75(11) . . ?
O4 Co2 O6 78.80(11) . . ?
O5 Co2 O6 77.13(10) . . ?
O4 Co2 N5 155.77(12) . . ?
O5 Co2 N5 86.03(12) . . ?
O6 Co2 N5 114.12(12) . . ?
O4 Co2 N6 115.57(13) . . ?
O5 Co2 N6 157.63(13) . . ?
O6 Co2 N6 86.79(12) . . ?
N5 Co2 N6 86.51(14) . . ?
O4 Co2 N4 86.68(13) . . ?
O5 Co2 N4 114.66(12) . . ?
O6 Co2 N4 158.79(13) . . ?
N5 Co2 N4 85.17(14) . . ?
N6 Co2 N4 85.64(14) . . ?
O4 Co2 Tb1 46.44(7) . . ?
O5 Co2 Tb1 45.88(7) . . ?
O6 Co2 Tb1 46.65(7) . . ?
N5 Co2 Tb1 127.46(10) . . ?
N6 Co2 Tb1 128.54(10) . . ?
N4 Co2 Tb1 128.60(10) . . ?
O13 Co3 O14 78.65(11) . . ?
O13 Co3 O16 77.29(11) . . ?
O14 Co3 O16 77.33(11) . . ?
O13 Co3 N9 159.91(13) . . ?
O14 Co3 N9 111.11(14) . . ?
O16 Co3 N9 87.57(13) . . ?
O13 Co3 N8 112.13(13) . . ?
O14 Co3 N8 87.17(13) . . ?
O16 Co3 N8 160.08(13) . . ?
N9 Co3 N8 86.43(15) . . ?
O13 Co3 N7 88.16(14) . . ?
O14 Co3 N7 162.29(13) . . ?
O16 Co3 N7 111.47(13) . . ?
N9 Co3 N7 85.15(15) . . ?
N8 Co3 N7 86.92(14) . . ?
O13 Co3 Tb2 47.04(8) . . ?
O14 Co3 Tb2 45.82(8) . . ?
O16 Co3 Tb2 46.51(7) . . ?
N9 Co3 Tb2 127.56(11) . . ?
N8 Co3 Tb2 126.94(10) . . ?
N7 Co3 Tb2 129.28(11) . . ?
O2 Tb1 O5 119.09(9) . . ?
O2 Tb1 O1 65.54(9) . . ?
O5 Tb1 O1 174.21(9) . . ?
O2 Tb1 O4 112.90(9) . . ?
O5 Tb1 O4 65.12(9) . . ?
O1 Tb1 O4 117.16(9) . . ?
O2 Tb1 O3 65.83(9) . . ?
O5 Tb1 O3 111.83(9) . . ?
O1 Tb1 O3 66.15(8) . . ?
O4 Tb1 O3 175.94(9) . . ?
O2 Tb1 O6 174.54(9) . . ?
O5 Tb1 O6 65.90(9) . . ?
O1 Tb1 O6 109.65(9) . . ?
O4 Tb1 O6 66.45(9) . . ?
O3 Tb1 O6 115.21(9) . . ?
O2 Tb1 O10 65.31(8) . . ?
O5 Tb1 O10 114.83(8) . . ?
O1 Tb1 O10 69.87(8) . . ?
O4 Tb1 O10 57.12(8) . . ?
O3 Tb1 O10 123.95(8) . . ?
O6 Tb1 O10 111.07(9) . . ?
O2 Tb1 O8 57.44(8) . . ?
O5 Tb1 O8 69.82(9) . . ?
O1 Tb1 O8 115.92(8) . . ?
O4 Tb1 O8 66.65(9) . . ?
O3 Tb1 O8 110.05(8) . . ?
O6 Tb1 O8 125.21(8) . . ?
O10 Tb1 O8 61.94(8) . . ?
O2 Tb1 O9 115.08(8) . . ?
O5 Tb1 O9 64.26(8) . . ?
O1 Tb1 O9 111.03(8) . . ?
O4 Tb1 O9 122.07(8) . . ?
O3 Tb1 O9 56.82(8) . . ?
O6 Tb1 O9 68.60(8) . . ?
O10 Tb1 O9 179.08(8) . . ?
O8 Tb1 O9 117.48(8) . . ?
O2 Tb1 O11 69.64(8) . . ?
O5 Tb1 O11 57.34(8) . . ?
O1 Tb1 O11 124.29(8) . . ?
O4 Tb1 O11 109.59(8) . . ?
O3 Tb1 O11 66.37(8) . . ?
O6 Tb1 O11 115.79(8) . . ?
O10 Tb1 O11 117.83(8) . . ?
O8 Tb1 O11 58.30(8) . . ?
O9 Tb1 O11 61.83(8) . . ?
O2 Tb1 Co2 143.25(6) . . ?
O5 Tb1 Co2 38.97(6) . . ?
O1 Tb1 Co2 139.45(6) . . ?
O4 Tb1 Co2 38.43(7) . . ?
O3 Tb1 Co2 140.64(6) . . ?
O6 Tb1 Co2 39.18(6) . . ?
O10 Tb1 Co2 95.40(6) . . ?
O8 Tb1 Co2 86.06(6) . . ?
O9 Tb1 Co2 83.82(5) . . ?
O11 Tb1 Co2 96.16(5) . . ?
O2 Tb1 Co1 38.79(6) . . ?
O5 Tb1 Co1 142.35(6) . . ?
O1 Tb1 Co1 38.98(6) . . ?
O4 Tb1 Co1 142.31(7) . . ?
O3 Tb1 Co1 38.84(6) . . ?
O6 Tb1 Co1 138.72(6) . . ?
O10 Tb1 Co1 85.23(6) . . ?
O8 Tb1 Co1 96.04(6) . . ?
O9 Tb1 Co1 95.57(5) . . ?
O11 Tb1 Co1 85.33(5) . . ?
Co2 Tb1 Co1 177.864(15) . . ?
O14 Tb2 O14 110.45(13) 6_656 . ?
O14 Tb2 O16 65.26(9) 6_656 6_656 ?
O14 Tb2 O16 173.78(9) . 6_656 ?
O14 Tb2 O16 173.77(9) 6_656 . ?
O14 Tb2 O16 65.26(9) . . ?
O16 Tb2 O16 119.39(13) 6_656 . ?
O14 Tb2 O13 65.79(9) 6_656 6_656 ?
O14 Tb2 O13 118.52(9) . 6_656 ?
O16 Tb2 O13 64.56(9) 6_656 6_656 ?
O16 Tb2 O13 111.71(9) . 6_656 ?
O14 Tb2 O13 118.52(9) 6_656 . ?
O14 Tb2 O13 65.79(9) . . ?
O16 Tb2 O13 111.71(9) 6_656 . ?
O16 Tb2 O13 64.56(9) . . ?
O13 Tb2 O13 173.22(13) 6_656 . ?
O14 Tb2 O17 65.73(9) 6_656 . ?
O14 Tb2 O17 56.74(9) . . ?
O16 Tb2 O17 122.53(9) 6_656 . ?
O16 Tb2 O17 108.13(9) . . ?
O13 Tb2 O17 69.29(9) 6_656 . ?
O13 Tb2 O17 116.94(9) . . ?
O14 Tb2 O17 56.74(9) 6_656 6_656 ?
O14 Tb2 O17 65.73(9) . 6_656 ?
O16 Tb2 O17 108.13(9) 6_656 6_656 ?
O16 Tb2 O17 122.53(9) . 6_656 ?
O13 Tb2 O17 116.94(9) 6_656 6_656 ?
O13 Tb2 O17 69.29(9) . 6_656 ?
O17 Tb2 O17 65.48(11) . 6_656 ?
O14 Tb2 Co3 38.34(7) 6_656 6_656 ?
O14 Tb2 Co3 140.24(7) . 6_656 ?
O16 Tb2 Co3 38.67(6) 6_656 6_656 ?
O16 Tb2 Co3 142.62(6) . 6_656 ?
O13 Tb2 Co3 38.43(7) 6_656 6_656 ?
O13 Tb2 Co3 141.72(7) . 6_656 ?
O17 Tb2 Co3 83.89(6) . 6_656 ?
O17 Tb2 Co3 94.78(6) 6_656 6_656 ?
O14 Tb2 Co3 140.24(7) 6_656 . ?
O14 Tb2 Co3 38.34(7) . . ?
O16 Tb2 Co3 142.62(6) 6_656 . ?
O16 Tb2 Co3 38.67(6) . . ?
O13 Tb2 Co3 141.72(7) 6_656 . ?
O13 Tb2 Co3 38.43(7) . . ?
O17 Tb2 Co3 94.78(6) . . ?
O17 Tb2 Co3 83.89(6) 6_656 . ?
Co3 Tb2 Co3 178.42(2) 6_656 . ?
N9 C130 C123 126.4(4) . . ?
O21 N20 O21 120.5(7) 6_657 . ?
O21 N20 O20 119.8(3) 6_657 . ?
O21 N20 O20 119.8(3) . . ?
O22 N21 O24 160.9(14) . . ?
O22 N21 O23 83.1(10) . . ?
O24 N21 O23 90.8(8) . . ?
#===========================================================================END
data_3

#----------------------------------------------------------------------------#
#                   CHEMICAL INFORMATION                                     #
#----------------------------------------------------------------------------#
 
_chemical_name_systematic
;
 ?
;
_chemical_formula_moiety                'C58 H60 Co2 Dy N6 O12, C H4 O, N O3' 
_chemical_formula_sum                   'C59 H64 Co2 Dy N7 O16'
_chemical_formula_weight                1407.53
_chemical_compound_source               'synthesis as described'
_chemical_absolute_configuration        ad
 
#----------------------------------------------------------------------------#
#                   UNIT CELL INFORMATION                                    #
#----------------------------------------------------------------------------#
 
_symmetry_cell_setting                  orthorhombic
_symmetry_space_group_name_H-M          'P 21 21 21'
_symmetry_space_group_name_Hall         'P 2ac 2ab'
_symmetry_Int_Tables_number             19
loop_
    _symmetry_equiv_pos_as_xyz
'x, y, z'
'-x+1/2, -y, z+1/2'
'x+1/2, -y+1/2, -z'
'-x, y+1/2, -z+1/2'
 
_cell_length_a                          15.7227(10)
_cell_length_b                          15.8241(10)
_cell_length_c                          24.3813(15)
_cell_angle_alpha                       90
_cell_angle_beta                        90
_cell_angle_gamma                       90
_cell_volume                            6066.0(7)
_cell_formula_units_Z                   4
_cell_measurement_temperature          180
_cell_measurement_reflns_used           4500
_cell_measurement_theta_min             2.8166
_cell_measurement_theta_max             32.1539
_cell_measurement_wavelength            0.71073
 
#----------------------------------------------------------------------------#
#                   CRYSTAL INFORMATION                                      #
#----------------------------------------------------------------------------#
 
_exptl_crystal_description              block
_exptl_crystal_colour                   orange
_exptl_crystal_size_max                 0.375
_exptl_crystal_size_mid                 0.15
_exptl_crystal_size_min                 0.125
_exptl_crystal_density_diffrn           1.541
_exptl_crystal_density_method           'not measured'
_exptl_crystal_F_000                    2860
_exptl_special_details
;
 ?
;
 
#----------------------------------------------------------------------------#
#                   ABSORPTION CORRECTION                                    #
#----------------------------------------------------------------------------#
 
_exptl_absorpt_coefficient_mu           1.833
_exptl_absorpt_correction_type          multi-scan
_exptl_absorpt_process_details
;
        [c.f. r.h. blessing, acta cryst. (1995), a51, 33-38]
;
_exptl_absorpt_correction_T_min         0.512
_exptl_absorpt_correction_T_max         0.7976

 
#----------------------------------------------------------------------------#
#                   DATA COLLECTION                                          #
#----------------------------------------------------------------------------#
 
_diffrn_ambient_temperature             180
_diffrn_radiation_type            MoK\a
_diffrn_radiation_source          'fine-focus sealed tube'
_diffrn_radiation_monochromator   graphite
_diffrn_measurement_device_type   'Oxford-Diffraction XCALIBUR'
_diffrn_measurement_method        \w-\f
_diffrn_detector_area_resol_mean  ?
_diffrn_standards_number          0
_diffrn_standards_interval_count  0
_diffrn_standards_interval_time   0
_diffrn_standards_decay_%         0
_diffrn_reflns_av_R_equivalents         0.0583
_diffrn_reflns_av_unetI/netI            0.0678
_diffrn_reflns_number                   44289
_diffrn_reflns_limit_h_min              -19
_diffrn_reflns_limit_h_max              19
_diffrn_reflns_limit_k_min              -17
_diffrn_reflns_limit_k_max              19
_diffrn_reflns_limit_l_min              -29
_diffrn_reflns_limit_l_max              29
_diffrn_reflns_theta_min                3.07
_diffrn_reflns_theta_max                25.68
_diffrn_reflns_theta_full               25.68
_diffrn_measured_fraction_theta_full
                                        0.996
_diffrn_measured_fraction_theta_max
                                        0.996
_reflns_number_total                    11485
_reflns_number_gt                       9170
_reflns_threshold_expression           >2\s(I)
                                     
#----------------------------------------------------------------------------#
#                   COMPUTER PROGRAMS USED                                   #
#----------------------------------------------------------------------------#
 
_computing_data_collection              'CrysAlis CCD, Oxford Diffraction Ltd.'
_computing_cell_refinement              'CrysAlis RED, Oxford Diffraction Ltd.'
_computing_data_reduction               'CrysAlis RED, Oxford Diffraction Ltd.'
_computing_structure_solution           'SIR92 (Giacovazzo et al, 1993)'
_computing_structure_refinement         'SHELXL-97 (Sheldrick, 1997)'
_computing_molecular_graphics           'Ortep-3 for Windows (Farrugia, 1997)'
_computing_publication_material
                                   'WinGX publication routines (Farrugia, 1999)'
 
#----------------------------------------------------------------------------#
#                   REFINEMENT INFORMATION                                   #
#----------------------------------------------------------------------------#
 
_refine_special_details
;
 Refinement of F^2^ against ALL reflections.  The weighted R-factor wR and
 goodness of fit S are based on F^2^, conventional R-factors R are based
 on F, with F set to zero for negative F^2^. The threshold expression of
 F^2^ > 2sigma(F^2^) is used only for calculating R-factors(gt) etc. and is
 not relevant to the choice of reflections for refinement.  R-factors based
 on F^2^ are statistically about twice as large as those based on F, and R-
 factors based on ALL data will be even larger.
;
_refine_ls_structure_factor_coef        Fsqd
_refine_ls_matrix_type                  full
_refine_ls_weighting_scheme             calc
_refine_ls_weighting_details
         'calc w=1/[\s^2^(Fo^2^)+(0.0514P)^2^+0.0000P] where P=(Fo^2^+2Fc^2^)/3'
_atom_sites_solution_primary            direct
_atom_sites_solution_secondary          difmap
_atom_sites_solution_hydrogens          geom
_refine_ls_hydrogen_treatment           constr
_refine_ls_extinction_method            none
_refine_ls_number_reflns                11485
_refine_ls_number_parameters            776
_refine_ls_number_restraints            0
_refine_ls_R_factor_all                 0.0485
_refine_ls_R_factor_gt                  0.0384
_refine_ls_wR_factor_ref                0.0945
_refine_ls_wR_factor_gt                 0.0914
_refine_ls_goodness_of_fit_ref          0.964
_refine_ls_restrained_S_all             0.964
_refine_ls_shift/su_max                 0.001
_refine_ls_shift/su_mean                0
_refine_ls_abs_structure_details
                                    'Flack H D (1983), Acta Cryst. A39, 876-881'
_refine_ls_abs_structure_Flack          -0.014(8)
_refine_diff_density_max                0.982
_refine_diff_density_min                -0.608
_refine_diff_density_rms                0.094
 
#----------------------------------------------------------------------------#
#                   ATOMIC TYPES, COORDINATES AND THERMAL PARAMETERS         #
#----------------------------------------------------------------------------#
 
loop_
    _atom_type_symbol
    _atom_type_description
    _atom_type_scat_dispersion_real
    _atom_type_scat_dispersion_imag
    _atom_type_scat_source
C C 0.0033 0.0016 'International Tables Vol C Tables 4.2.6.8 and 6.1.1.4'
H H 0 0 'International Tables Vol C Tables 4.2.6.8 and 6.1.1.4'
N N 0.0061 0.0033 'International Tables Vol C Tables 4.2.6.8 and 6.1.1.4'
O O 0.0106 0.006 'International Tables Vol C Tables 4.2.6.8 and 6.1.1.4'
Co Co 0.3494 0.9721 'International Tables Vol C Tables 4.2.6.8 and 6.1.1.4'
Dy Dy -0.1892 4.4098 'International Tables Vol C Tables 4.2.6.8 and 6.1.1.4'
 
loop_
    _atom_site_label
    _atom_site_type_symbol
    _atom_site_fract_x
    _atom_site_fract_y
    _atom_site_fract_z
    _atom_site_U_iso_or_equiv
    _atom_site_adp_type
    _atom_site_occupancy
    _atom_site_symmetry_multiplicity
    _atom_site_calc_flag
    _atom_site_refinement_flags
    _atom_site_disorder_assembly
    _atom_site_disorder_group
C1 C 0.2482(4) 0.4994(4) 0.2516(3) 0.0386(16) Uani 1 1 d . . .
H1A H 0.2355 0.5568 0.263 0.046 Uiso 1 1 calc R . .
H1B H 0.2225 0.4903 0.2159 0.046 Uiso 1 1 calc R . .
C2 C 0.3859(4) 0.4718(4) 0.3044(3) 0.0363(15) Uani 1 1 d . . .
H2A H 0.4455 0.4879 0.3039 0.044 Uiso 1 1 calc R . .
H2B H 0.3572 0.5071 0.3312 0.044 Uiso 1 1 calc R . .
C3 C 0.3687(4) 0.4156(4) 0.2082(3) 0.0433(18) Uani 1 1 d . . .
H3A H 0.3647 0.436 0.1708 0.052 Uiso 1 1 calc R . .
H3B H 0.4268 0.3977 0.2145 0.052 Uiso 1 1 calc R . .
C4 C 0.3469(4) 0.4873(4) 0.2475(3) 0.0309(15) Uani 1 1 d . . .
C5 C 0.3847(4) 0.5711(4) 0.2238(3) 0.051(2) Uani 1 1 d . . .
H5A H 0.3466 0.5938 0.1968 0.077 Uiso 1 1 calc R . .
H5B H 0.4388 0.5597 0.2071 0.077 Uiso 1 1 calc R . .
H5C H 0.3919 0.6113 0.2529 0.077 Uiso 1 1 calc R . .
C6 C 0.1233(4) -0.1829(4) 0.4785(3) 0.0351(16) Uani 1 1 d . . .
H6A H 0.1227 -0.1995 0.5168 0.042 Uiso 1 1 calc R . .
H6B H 0.1667 -0.216 0.4601 0.042 Uiso 1 1 calc R . .
C7 C -0.0274(4) -0.1321(5) 0.4645(3) 0.0467(18) Uani 1 1 d . . .
H7A H -0.0848 -0.1536 0.4602 0.056 Uiso 1 1 calc R . .
H7B H -0.0207 -0.1147 0.5024 0.056 Uiso 1 1 calc R . .
C8 C 0.0446(4) -0.2155(4) 0.3911(3) 0.0444(18) Uani 1 1 d . . .
H8A H 0.0641 -0.2727 0.3842 0.053 Uiso 1 1 calc R . .
H8B H -0.0106 -0.2091 0.3738 0.053 Uiso 1 1 calc R . .
C9 C 0.0352(4) -0.2025(4) 0.4524(3) 0.0350(16) Uani 1 1 d . . .
C10 C 0.0032(5) -0.2845(5) 0.4776(3) 0.054(2) Uani 1 1 d . . .
H10A H -0.0091 -0.2757 0.5157 0.081 Uiso 1 1 calc R . .
H10B H 0.0462 -0.3273 0.474 0.081 Uiso 1 1 calc R . .
H10C H -0.0475 -0.3023 0.4589 0.081 Uiso 1 1 calc R . .
C11 C 0.1600(4) 0.4721(4) 0.3265(3) 0.0326(16) Uani 1 1 d . . .
H11 H 0.1527 0.5304 0.3243 0.039 Uiso 1 1 calc R . .
C12 C 0.1119(4) 0.4292(4) 0.3683(2) 0.0266(13) Uani 1 1 d . . .
C13 C 0.0524(4) 0.4797(4) 0.3974(2) 0.0317(14) Uani 1 1 d . . .
H13 H 0.05 0.5376 0.3911 0.038 Uiso 1 1 calc R . .
C14 C -0.0013(4) 0.4434(4) 0.4345(2) 0.0353(15) Uani 1 1 d . . .
H14 H -0.0407 0.4764 0.4532 0.042 Uiso 1 1 calc R . .
C15 C 0.0032(4) 0.3557(4) 0.4443(2) 0.0312(13) Uani 1 1 d . . .
H15 H -0.0338 0.3311 0.4694 0.037 Uiso 1 1 calc R . .
C16 C 0.0596(4) 0.3075(4) 0.4181(2) 0.0277(14) Uani 1 1 d . . .
C17 C 0.1164(3) 0.3414(4) 0.3801(2) 0.0282(15) Uani 1 1 d . . .
C18 C 0.0160(4) 0.1819(4) 0.4651(2) 0.0319(15) Uani 1 1 d . . .
H18A H 0.0297 0.2044 0.5006 0.048 Uiso 1 1 calc R . .
H18B H 0.0259 0.122 0.4649 0.048 Uiso 1 1 calc R . .
H18C H -0.0427 0.1929 0.457 0.048 Uiso 1 1 calc R . .
C19 C 0.4471(3) 0.3505(4) 0.3419(2) 0.0308(13) Uani 1 1 d . . .
H19 H 0.494 0.3861 0.3442 0.037 Uiso 1 1 calc R . .
C20 C 0.4586(4) 0.2664(4) 0.3618(2) 0.0272(14) Uani 1 1 d . . .
C21 C 0.5383(4) 0.2472(4) 0.3859(2) 0.0304(14) Uani 1 1 d . . .
H21 H 0.5806 0.2882 0.3855 0.036 Uiso 1 1 calc R . .
C22 C 0.5552(4) 0.1714(4) 0.4094(2) 0.0319(15) Uani 1 1 d . . .
H22 H 0.6082 0.1604 0.4248 0.038 Uiso 1 1 calc R . .
C23 C 0.4911(4) 0.1100(4) 0.4097(2) 0.0305(14) Uani 1 1 d . . .
H23 H 0.5022 0.0572 0.4248 0.037 Uiso 1 1 calc R . .
C24 C 0.4130(3) 0.1263(4) 0.3883(2) 0.0281(14) Uani 1 1 d . . .
C25 C 0.3949(3) 0.2038(3) 0.3620(2) 0.0232(13) Uani 1 1 d . . .
C26 C 0.3589(4) -0.0094(4) 0.4160(3) 0.0420(17) Uani 1 1 d . . .
H26A H 0.4036 -0.0398 0.3978 0.063 Uiso 1 1 calc R . .
H26B H 0.3073 -0.0418 0.4145 0.063 Uiso 1 1 calc R . .
H26C H 0.3744 0.0001 0.4536 0.063 Uiso 1 1 calc R . .
C27 C 0.2812(4) 0.3108(4) 0.1714(3) 0.0379(16) Uani 1 1 d . . .
H27 H 0.2964 0.3378 0.139 0.046 Uiso 1 1 calc R . .
C28 C 0.2262(4) 0.2380(4) 0.1659(2) 0.0344(15) Uani 1 1 d . . .
C29 C 0.2120(4) 0.2068(4) 0.1122(3) 0.0383(17) Uani 1 1 d . . .
H29 H 0.2311 0.2381 0.0824 0.046 Uiso 1 1 calc R . .
C30 C 0.1714(4) 0.1327(4) 0.1032(2) 0.0409(17) Uani 1 1 d . . .
H30 H 0.1645 0.1127 0.0676 0.049 Uiso 1 1 calc R . .
C31 C 0.1397(4) 0.0861(4) 0.1480(3) 0.0357(15) Uani 1 1 d . . .
H31 H 0.1118 0.0351 0.142 0.043 Uiso 1 1 calc R . .
C32 C 0.1498(4) 0.1153(4) 0.1999(2) 0.0287(14) Uani 1 1 d . . .
C33 C 0.1939(4) 0.1922(4) 0.2111(2) 0.0281(13) Uani 1 1 d . . .
C34 C 0.0738(4) -0.0004(4) 0.2386(3) 0.0389(16) Uani 1 1 d . . .
H34A H 0.0228 0.012 0.2184 0.058 Uiso 1 1 calc R . .
H34B H 0.0591 -0.0237 0.2737 0.058 Uiso 1 1 calc R . .
H34C H 0.1073 -0.0406 0.2185 0.058 Uiso 1 1 calc R . .
C35 C 0.1649(4) -0.0548(4) 0.5188(3) 0.0334(16) Uani 1 1 d . . .
H35 H 0.1606 -0.0868 0.5507 0.04 Uiso 1 1 calc R . .
C36 C 0.1932(4) 0.0310(3) 0.5261(2) 0.0270(13) Uani 1 1 d . . .
C37 C 0.2157(4) 0.0548(4) 0.5790(2) 0.0331(15) Uani 1 1 d . . .
H37 H 0.207 0.0172 0.6078 0.04 Uiso 1 1 calc R . .
C38 C 0.2505(4) 0.1331(4) 0.5896(2) 0.0336(15) Uani 1 1 d . . .
H38 H 0.2653 0.1482 0.6252 0.04 Uiso 1 1 calc R . .
C39 C 0.2636(4) 0.1901(4) 0.5459(2) 0.0286(14) Uani 1 1 d . . .
H39 H 0.2882 0.2426 0.5524 0.034 Uiso 1 1 calc R . .
C40 C 0.2399(4) 0.1678(4) 0.4942(2) 0.0268(14) Uani 1 1 d . . .
C41 C 0.2023(4) 0.0888(3) 0.4820(2) 0.0246(13) Uani 1 1 d . . .
C42 C 0.2846(4) 0.3015(3) 0.4571(3) 0.0330(15) Uani 1 1 d . . .
H42A H 0.2493 0.3308 0.483 0.049 Uiso 1 1 calc R . .
H42B H 0.2853 0.3319 0.423 0.049 Uiso 1 1 calc R . .
H42C H 0.3415 0.2977 0.4713 0.049 Uiso 1 1 calc R . .
C43 C -0.0861(4) -0.0211(4) 0.4127(2) 0.0329(15) Uani 1 1 d . . .
H43 H -0.1367 -0.046 0.424 0.04 Uiso 1 1 calc R . .
C44 C -0.0941(4) 0.0545(4) 0.3791(2) 0.0289(14) Uani 1 1 d . . .
C45 C -0.1763(4) 0.0900(4) 0.3728(2) 0.0323(14) Uani 1 1 d . . .
H45 H -0.2224 0.0621 0.3884 0.039 Uiso 1 1 calc R . .
C46 C -0.1908(4) 0.1626(3) 0.3451(2) 0.0303(13) Uani 1 1 d . . .
H46 H -0.2455 0.1843 0.3423 0.036 Uiso 1 1 calc R . .
C47 C -0.1232(4) 0.2039(4) 0.3212(2) 0.0272(14) Uani 1 1 d . . .
H47 H -0.1325 0.2538 0.302 0.033 Uiso 1 1 calc R . .
C48 C -0.0426(4) 0.1722(4) 0.3253(2) 0.0251(13) Uani 1 1 d . . .
C49 C -0.0246(3) 0.0969(3) 0.3545(2) 0.0244(13) Uani 1 1 d . . .
C50 C 0.0177(4) 0.2822(4) 0.2700(3) 0.0361(16) Uani 1 1 d . . .
H50A H -0.0168 0.2677 0.239 0.054 Uiso 1 1 calc R . .
H50B H 0.0718 0.3028 0.2576 0.054 Uiso 1 1 calc R . .
H50C H -0.0103 0.3254 0.291 0.054 Uiso 1 1 calc R . .
C51 C 0.1638(4) -0.1896(4) 0.3345(3) 0.0400(18) Uani 1 1 d . . .
H51 H 0.1633 -0.2482 0.3317 0.048 Uiso 1 1 calc R . .
C52 C 0.2282(4) -0.1454(4) 0.3041(2) 0.0333(14) Uani 1 1 d . . .
C53 C 0.2779(5) -0.1946(4) 0.2700(3) 0.0433(18) Uani 1 1 d . . .
H53 H 0.2698 -0.2528 0.2695 0.052 Uiso 1 1 calc R . .
C54 C 0.3397(5) -0.1592(5) 0.2365(3) 0.054(2) Uani 1 1 d . . .
H54 H 0.374 -0.1931 0.2145 0.065 Uiso 1 1 calc R . .
C55 C 0.3492(4) -0.0699(4) 0.2366(3) 0.0408(17) Uani 1 1 d . . .
H55 H 0.3885 -0.045 0.2131 0.049 Uiso 1 1 calc R . .
C56 C 0.3027(4) -0.0212(4) 0.2699(2) 0.0324(15) Uani 1 1 d . . .
C57 C 0.2420(4) -0.0548(4) 0.3057(2) 0.0294(15) Uani 1 1 d . . .
C58 C 0.3688(4) 0.1044(4) 0.2385(2) 0.0367(16) Uani 1 1 d . . .
H58A H 0.4241 0.0829 0.2478 0.055 Uiso 1 1 calc R . .
H58B H 0.3676 0.1644 0.2443 0.055 Uiso 1 1 calc R . .
H58C H 0.3569 0.0924 0.2007 0.055 Uiso 1 1 calc R . .
C100 C 0.1646(6) 0.5363(5) 0.5312(4) 0.078(3) Uani 1 1 d . . .
H10D H 0.1872 0.4857 0.5473 0.117 Uiso 1 1 calc R . .
H10E H 0.1569 0.5279 0.4925 0.117 Uiso 1 1 calc R . .
H10F H 0.1109 0.5495 0.5478 0.117 Uiso 1 1 calc R . .
N1 N 0.2124(3) 0.4389(3) 0.2916(2) 0.0318(12) Uani 1 1 d . . .
N2 N 0.3788(3) 0.3828(3) 0.3211(2) 0.0340(13) Uani 1 1 d . . .
N3 N 0.3111(3) 0.3423(3) 0.21521(19) 0.0331(11) Uani 1 1 d . . .
N4 N 0.1449(3) -0.0925(3) 0.4745(2) 0.0321(13) Uani 1 1 d . . .
N5 N -0.0166(3) -0.0575(3) 0.4287(2) 0.0355(13) Uani 1 1 d . . .
N6 N 0.1054(3) -0.1548(3) 0.36598(19) 0.0338(12) Uani 1 1 d . . .
N7 N 0.2670(4) 0.6445(4) 0.4042(3) 0.0541(15) Uani 1 1 d . . .
O1 O 0.1729(2) 0.2929(2) 0.35412(16) 0.0269(9) Uani 1 1 d . . .
O2 O 0.3191(2) 0.2147(2) 0.34046(15) 0.0259(8) Uani 1 1 d . . .
O3 O 0.2040(2) 0.2160(2) 0.26196(15) 0.0264(9) Uani 1 1 d . . .
O4 O 0.0540(2) 0.0700(2) 0.35805(15) 0.0257(9) Uani 1 1 d . . .
O5 O 0.1982(2) -0.0056(2) 0.33914(15) 0.0269(9) Uani 1 1 d . . .
O6 O 0.1765(3) 0.0728(2) 0.43192(14) 0.0249(9) Uani 1 1 d . . .
O7 O 0.0691(2) 0.2218(3) 0.42387(16) 0.0295(10) Uani 1 1 d . . .
O8 O 0.3461(2) 0.0697(2) 0.38936(17) 0.0325(10) Uani 1 1 d . . .
O9 O 0.1217(3) 0.0754(3) 0.24612(16) 0.0327(10) Uani 1 1 d . . .
O10 O 0.2516(3) 0.2183(2) 0.44823(16) 0.0304(10) Uani 1 1 d . . .
O11 O 0.0301(2) 0.2089(2) 0.30363(16) 0.0285(9) Uani 1 1 d . . .
O12 O 0.3066(3) 0.0653(2) 0.27212(15) 0.0334(10) Uani 1 1 d . . .
O20 O 0.2931(3) 0.6464(3) 0.3566(2) 0.0660(15) Uani 1 1 d . . .
O21 O 0.1913(4) 0.6351(4) 0.4159(2) 0.0715(16) Uani 1 1 d . . .
O22 O 0.3123(5) 0.6586(7) 0.4421(3) 0.149(4) Uani 1 1 d . . .
O23 O 0.2203(4) 0.6018(3) 0.5396(2) 0.0605(15) Uani 1 1 d . . .
H23A H 0.2456 0.6123 0.511 0.091 Uiso 1 1 calc R . .
Co1 Co 0.26792(5) 0.31890(5) 0.29612(3) 0.02629(19) Uani 1 1 d . . .
Co2 Co 0.10855(5) -0.03202(5) 0.40062(3) 0.02639(19) Uani 1 1 d . . .
Dy1 Dy 0.186275(18) 0.143081(17) 0.346769(11) 0.02764(8) Uani 1 1 d . . .
 
loop_
    _atom_site_aniso_label
    _atom_site_aniso_U_11
    _atom_site_aniso_U_22
    _atom_site_aniso_U_33
    _atom_site_aniso_U_23
    _atom_site_aniso_U_13
    _atom_site_aniso_U_12
C1 0.031(4) 0.040(4) 0.044(4) 0.017(3) 0.003(3) 0.000(3)
C2 0.031(4) 0.034(4) 0.043(4) 0.009(3) -0.001(3) -0.007(3)
C3 0.029(4) 0.049(4) 0.052(5) 0.025(4) 0.012(3) -0.002(3)
C4 0.021(3) 0.031(4) 0.042(4) 0.016(3) -0.001(3) -0.006(3)
C5 0.036(4) 0.044(4) 0.074(5) 0.024(4) 0.008(4) -0.011(3)
C6 0.043(4) 0.023(3) 0.039(4) 0.005(3) -0.012(3) -0.007(3)
C7 0.038(4) 0.062(5) 0.041(4) 0.019(4) -0.002(3) -0.010(4)
C8 0.040(4) 0.042(4) 0.052(5) 0.004(3) -0.010(3) -0.020(3)
C9 0.033(4) 0.043(4) 0.029(4) 0.010(3) -0.011(3) -0.013(3)
C10 0.064(5) 0.050(5) 0.048(5) 0.020(4) -0.012(4) -0.023(4)
C11 0.025(3) 0.029(3) 0.044(4) 0.008(3) -0.010(3) -0.008(3)
C12 0.022(3) 0.038(4) 0.020(3) 0.000(3) -0.001(2) -0.009(3)
C13 0.037(4) 0.026(3) 0.032(4) -0.003(3) -0.002(3) 0.001(3)
C14 0.036(4) 0.045(4) 0.025(4) -0.006(3) 0.000(3) 0.003(3)
C15 0.031(3) 0.033(3) 0.030(3) 0.003(3) 0.004(3) 0.002(3)
C16 0.028(3) 0.030(4) 0.025(3) 0.001(3) -0.007(3) 0.005(3)
C17 0.014(3) 0.032(4) 0.039(4) -0.023(3) -0.011(3) 0.013(3)
C18 0.029(3) 0.038(4) 0.029(4) 0.005(3) 0.005(3) -0.003(3)
C19 0.017(3) 0.032(3) 0.043(3) 0.002(3) -0.002(3) -0.003(3)
C20 0.019(3) 0.035(4) 0.027(4) -0.004(3) 0.001(2) 0.002(3)
C21 0.024(3) 0.036(4) 0.031(4) -0.002(3) 0.006(3) -0.003(3)
C22 0.022(3) 0.044(4) 0.030(4) 0.003(3) 0.002(3) 0.004(3)
C23 0.028(3) 0.032(3) 0.032(4) 0.008(3) 0.003(3) 0.006(3)
C24 0.022(3) 0.039(4) 0.022(3) -0.001(3) 0.004(2) -0.002(3)
C25 0.017(3) 0.028(3) 0.025(3) 0.004(2) 0.004(2) 0.007(2)
C26 0.044(4) 0.034(4) 0.048(4) 0.005(3) -0.013(3) 0.002(3)
C27 0.039(4) 0.043(4) 0.032(4) 0.010(3) 0.007(3) 0.008(3)
C28 0.031(3) 0.038(4) 0.034(4) 0.006(3) -0.001(3) 0.006(3)
C29 0.030(4) 0.057(5) 0.028(4) 0.007(3) 0.006(3) 0.013(3)
C30 0.043(4) 0.058(5) 0.021(3) 0.001(3) -0.005(3) 0.007(4)
C31 0.030(3) 0.040(4) 0.038(4) -0.003(3) -0.006(3) 0.005(3)
C32 0.026(3) 0.035(4) 0.025(3) 0.008(3) 0.000(3) 0.009(3)
C33 0.026(3) 0.037(4) 0.021(3) 0.001(3) -0.003(3) 0.007(3)
C34 0.029(4) 0.046(4) 0.042(4) 0.002(3) -0.004(3) -0.013(3)
C35 0.038(4) 0.032(4) 0.030(4) 0.010(3) 0.000(3) 0.001(3)
C36 0.021(3) 0.029(3) 0.031(3) 0.000(2) -0.003(3) -0.004(3)
C37 0.038(4) 0.030(4) 0.031(4) 0.011(3) -0.002(3) 0.002(3)
C38 0.041(4) 0.036(4) 0.024(3) -0.002(3) -0.005(3) -0.004(3)
C39 0.022(3) 0.031(3) 0.033(4) -0.005(3) -0.004(3) 0.001(3)
C40 0.018(3) 0.031(4) 0.031(3) -0.001(3) 0.002(3) 0.001(2)
C41 0.026(3) 0.026(3) 0.022(3) -0.001(2) 0.000(2) 0.007(3)
C42 0.033(4) 0.026(3) 0.040(4) 0.006(3) -0.005(3) -0.005(3)
C43 0.033(4) 0.038(4) 0.028(4) 0.001(3) 0.005(3) -0.008(3)
C44 0.026(3) 0.033(4) 0.027(3) -0.002(3) 0.000(3) -0.003(3)
C45 0.021(3) 0.042(4) 0.034(3) -0.012(3) 0.003(3) -0.008(3)
C46 0.021(3) 0.030(3) 0.040(3) -0.008(3) 0.004(3) 0.002(3)
C47 0.028(3) 0.020(3) 0.033(3) -0.005(2) -0.007(3) 0.000(3)
C48 0.022(3) 0.031(3) 0.023(3) 0.001(2) 0.002(2) -0.004(3)
C49 0.016(3) 0.028(3) 0.029(3) -0.002(3) -0.004(3) -0.003(2)
C50 0.033(4) 0.029(4) 0.046(4) 0.013(3) -0.002(3) 0.001(3)
C51 0.053(5) 0.026(3) 0.041(4) 0.002(3) -0.018(3) -0.001(3)
C52 0.036(3) 0.037(4) 0.027(3) 0.005(3) -0.003(3) 0.002(3)
C53 0.057(5) 0.033(4) 0.041(4) -0.007(3) -0.005(4) 0.011(3)
C54 0.054(5) 0.067(6) 0.041(4) 0.000(4) 0.007(3) 0.026(4)
C55 0.049(4) 0.041(4) 0.033(4) -0.002(3) 0.009(3) 0.008(3)
C56 0.035(4) 0.032(4) 0.030(3) -0.002(3) -0.009(3) 0.006(3)
C57 0.028(3) 0.030(4) 0.030(4) -0.009(3) -0.013(3) 0.022(3)
C58 0.028(4) 0.048(4) 0.034(4) 0.004(3) 0.003(3) -0.002(3)
C100 0.091(8) 0.078(6) 0.064(6) 0.021(5) -0.035(5) -0.010(6)
N1 0.020(3) 0.038(3) 0.038(3) 0.011(2) 0.002(2) -0.001(2)
N2 0.033(3) 0.030(3) 0.038(3) 0.004(2) 0.004(2) -0.011(2)
N3 0.027(3) 0.037(3) 0.035(3) 0.011(2) 0.005(2) 0.001(3)
N4 0.038(3) 0.025(3) 0.033(3) -0.002(2) -0.011(2) 0.001(2)
N5 0.024(3) 0.041(3) 0.041(3) 0.012(3) 0.003(2) -0.006(3)
N6 0.040(3) 0.030(3) 0.032(3) 0.008(2) -0.011(2) -0.011(3)
N7 0.054(4) 0.048(4) 0.060(4) 0.007(4) -0.017(4) -0.001(4)
O1 0.025(2) 0.026(2) 0.029(2) 0.0045(17) 0.0024(19) 0.0008(17)
O2 0.0183(19) 0.0254(19) 0.034(2) 0.0060(17) -0.004(2) 0.0021(17)
O3 0.027(2) 0.030(2) 0.023(2) 0.0002(17) -0.0005(17) -0.0022(18)
O4 0.020(2) 0.028(2) 0.030(2) 0.0070(17) -0.0015(17) -0.0020(17)
O5 0.021(2) 0.024(2) 0.035(2) 0.0042(17) -0.003(2) 0.0004(17)
O6 0.032(2) 0.0216(19) 0.021(2) 0.0001(16) -0.0047(19) -0.0045(19)
O7 0.023(2) 0.034(2) 0.032(2) 0.0075(19) 0.0047(18) -0.0048(19)
O8 0.027(2) 0.030(2) 0.041(3) 0.011(2) -0.0042(19) -0.0025(19)
O9 0.035(3) 0.034(2) 0.028(2) -0.0028(19) -0.0009(19) -0.005(2)
O10 0.034(3) 0.030(2) 0.027(2) 0.0089(19) -0.0071(19) -0.0083(19)
O11 0.026(2) 0.028(2) 0.031(2) 0.0079(18) -0.0024(18) -0.0021(18)
O12 0.030(2) 0.037(2) 0.033(2) -0.0017(18) 0.008(2) -0.002(2)
O20 0.077(4) 0.060(3) 0.061(4) 0.018(3) 0.016(3) 0.006(3)
O21 0.058(3) 0.069(4) 0.087(4) -0.002(3) 0.028(3) -0.013(4)
O22 0.095(6) 0.263(11) 0.088(5) 0.013(6) -0.043(5) -0.031(8)
O23 0.061(4) 0.072(4) 0.049(3) 0.002(3) -0.013(3) -0.022(3)
Co1 0.0210(4) 0.0292(4) 0.0287(5) 0.0065(4) 0.0007(4) -0.0017(4)
Co2 0.0243(4) 0.0269(4) 0.0280(5) 0.0046(4) -0.0043(4) -0.0039(4)
Dy1 0.02558(14) 0.02697(14) 0.03037(14) 0.00420(13) 0.00057(13) -0.00278(13)
 
 
#----------------------------------------------------------------------------#
#                   MOLECULAR GEOMETRY                                       #
#----------------------------------------------------------------------------#
 
_geom_special_details
;
 All esds (except the esd in the dihedral angle between two l.s. planes)
 are estimated using the full covariance matrix.  The cell esds are taken
 into account individually in the estimation of esds in distances, angles
 and torsion angles; correlations between esds in cell parameters are only
 used when they are defined by crystal symmetry.  An approximate (isotropic)
 treatment of cell esds is used for estimating esds involving l.s. planes.
;
loop_
    _geom_bond_atom_site_label_1
    _geom_bond_atom_site_label_2
    _geom_bond_distance
    _geom_bond_site_symmetry_2
    _geom_bond_publ_flag
C1 N1 1.479(8) . ?
C1 C4 1.568(9) . ?
C2 N2 1.470(7) . ?
C2 C4 1.537(9) . ?
C3 N3 1.482(8) . ?
C3 C4 1.523(9) . ?
C4 C5 1.564(8) . ?
C6 N4 1.474(7) . ?
C6 C9 1.557(8) . ?
C7 N5 1.477(8) . ?
C7 C9 1.515(9) . ?
C8 N6 1.487(8) . ?
C8 C9 1.517(9) . ?
C9 C10 1.521(9) . ?
C11 N1 1.295(8) . ?
C11 C12 1.439(8) . ?
C12 C13 1.420(8) . ?
C12 C17 1.421(8) . ?
C13 C14 1.364(8) . ?
C14 C15 1.411(9) . ?
C15 C16 1.334(8) . ?
C16 O7 1.371(7) . ?
C16 C17 1.395(8) . ?
C17 O1 1.334(6) . ?
C18 O7 1.451(6) . ?
C19 N2 1.293(7) . ?
C19 C20 1.429(8) . ?
C20 C25 1.409(8) . ?
C20 C21 1.416(8) . ?
C21 C22 1.356(8) . ?
C22 C23 1.400(8) . ?
C23 C24 1.359(8) . ?
C24 O8 1.382(7) . ?
C24 C25 1.413(7) . ?
C25 O2 1.313(6) . ?
C26 O8 1.424(7) . ?
C27 N3 1.268(8) . ?
C27 C28 1.446(9) . ?
C28 C33 1.412(8) . ?
C28 C29 1.417(9) . ?
C29 C30 1.352(9) . ?
C30 C31 1.410(9) . ?
C31 C32 1.356(8) . ?
C32 O9 1.364(7) . ?
C32 C33 1.427(8) . ?
C33 O3 1.307(6) . ?
C34 O9 1.429(7) . ?
C35 N4 1.275(7) . ?
C35 C36 1.440(8) . ?
C36 C37 1.390(8) . ?
C36 C41 1.418(7) . ?
C37 C38 1.379(8) . ?
C38 C39 1.410(8) . ?
C39 C40 1.363(8) . ?
C40 O10 1.388(7) . ?
C40 C41 1.414(8) . ?
C41 O6 1.311(6) . ?
C42 O10 1.432(6) . ?
C43 N5 1.295(8) . ?
C43 C44 1.455(8) . ?
C44 C49 1.416(7) . ?
C44 C45 1.418(8) . ?
C45 C46 1.350(8) . ?
C46 C47 1.377(8) . ?
C47 C48 1.366(8) . ?
C48 O11 1.386(6) . ?
C48 C49 1.417(8) . ?
C49 O4 1.310(6) . ?
C50 O11 1.433(7) . ?
C51 N6 1.318(8) . ?
C51 C52 1.436(9) . ?
C52 C53 1.383(9) . ?
C52 C57 1.451(9) . ?
C53 C54 1.387(10) . ?
C54 C55 1.421(11) . ?
C55 C56 1.337(9) . ?
C56 O12 1.372(7) . ?
C56 C57 1.398(9) . ?
C57 O5 1.322(6) . ?
C58 O12 1.419(7) . ?
C100 O23 1.373(9) . ?
N1 Co1 2.093(5) . ?
N2 Co1 2.106(5) . ?
N3 Co1 2.119(5) . ?
N4 Co2 2.118(5) . ?
N5 Co2 2.123(5) . ?
N6 Co2 2.120(5) . ?
N7 O22 1.187(8) . ?
N7 O20 1.231(7) . ?
N7 O21 1.233(8) . ?
O1 Co1 2.098(4) . ?
O1 Dy1 2.386(3) . ?
O2 Co1 2.130(3) . ?
O2 Dy1 2.382(4) . ?
O3 Co1 2.086(4) . ?
O3 Dy1 2.385(4) . ?
O4 Co2 2.101(4) . ?
O4 Dy1 2.395(4) . ?
O5 Co2 2.099(4) . ?
O5 Dy1 2.367(3) . ?
O6 Co2 2.115(4) . ?
O6 Dy1 2.360(3) . ?
O9 Dy1 2.864(4) . ?
O11 Dy1 2.868(4) . ?
O12 Dy1 2.899(4) . ?
Co1 Dy1 3.3034(8) . ?
Co2 Dy1 3.3007(8) . ?
 
loop_
    _geom_angle_atom_site_label_1
    _geom_angle_atom_site_label_2
    _geom_angle_atom_site_label_3
    _geom_angle
    _geom_angle_site_symmetry_1
    _geom_angle_site_symmetry_3
    _geom_angle_publ_flag
N1 C1 C4 109.9(5) . . ?
N2 C2 C4 111.9(5) . . ?
N3 C3 C4 112.0(5) . . ?
C3 C4 C2 111.1(5) . . ?
C3 C4 C5 108.3(5) . . ?
C2 C4 C5 108.5(5) . . ?
C3 C4 C1 110.7(5) . . ?
C2 C4 C1 110.9(5) . . ?
C5 C4 C1 107.2(5) . . ?
N4 C6 C9 111.7(5) . . ?
N5 C7 C9 113.4(5) . . ?
N6 C8 C9 112.4(5) . . ?
C7 C9 C8 110.8(5) . . ?
C7 C9 C10 109.6(6) . . ?
C8 C9 C10 108.3(5) . . ?
C7 C9 C6 110.7(5) . . ?
C8 C9 C6 110.1(5) . . ?
C10 C9 C6 107.4(5) . . ?
N1 C11 C12 127.4(6) . . ?
C13 C12 C17 118.8(5) . . ?
C13 C12 C11 115.8(6) . . ?
C17 C12 C11 125.3(6) . . ?
C14 C13 C12 120.2(6) . . ?
C13 C14 C15 119.7(6) . . ?
C16 C15 C14 121.0(6) . . ?
C15 C16 O7 126.1(6) . . ?
C15 C16 C17 121.6(6) . . ?
O7 C16 C17 112.3(5) . . ?
O1 C17 C16 121.3(5) . . ?
O1 C17 C12 120.0(5) . . ?
C16 C17 C12 118.7(5) . . ?
N2 C19 C20 127.3(5) . . ?
C25 C20 C21 118.5(5) . . ?
C25 C20 C19 124.5(5) . . ?
C21 C20 C19 116.9(5) . . ?
C22 C21 C20 122.6(6) . . ?
C21 C22 C23 118.3(6) . . ?
C24 C23 C22 121.1(6) . . ?
C23 C24 O8 123.9(5) . . ?
C23 C24 C25 121.4(5) . . ?
O8 C24 C25 114.7(5) . . ?
O2 C25 C20 123.4(5) . . ?
O2 C25 C24 118.6(5) . . ?
C20 C25 C24 117.9(5) . . ?
N3 C27 C28 127.7(6) . . ?
C33 C28 C29 119.0(6) . . ?
C33 C28 C27 123.5(6) . . ?
C29 C28 C27 117.2(6) . . ?
C30 C29 C28 121.8(6) . . ?
C29 C30 C31 119.6(6) . . ?
C32 C31 C30 120.3(6) . . ?
C31 C32 O9 125.1(6) . . ?
C31 C32 C33 121.6(5) . . ?
O9 C32 C33 113.2(5) . . ?
O3 C33 C28 123.2(5) . . ?
O3 C33 C32 119.1(5) . . ?
C28 C33 C32 117.7(5) . . ?
N4 C35 C36 128.5(5) . . ?
C37 C36 C41 120.2(5) . . ?
C37 C36 C35 116.6(5) . . ?
C41 C36 C35 123.1(5) . . ?
C38 C37 C36 121.2(5) . . ?
C37 C38 C39 119.4(5) . . ?
C40 C39 C38 119.6(6) . . ?
C39 C40 O10 124.2(5) . . ?
C39 C40 C41 122.5(5) . . ?
O10 C40 C41 113.3(5) . . ?
O6 C41 C40 119.7(5) . . ?
O6 C41 C36 123.3(5) . . ?
C40 C41 C36 116.9(5) . . ?
N5 C43 C44 127.5(6) . . ?
C49 C44 C45 118.0(5) . . ?
C49 C44 C43 124.2(5) . . ?
C45 C44 C43 117.8(5) . . ?
C46 C45 C44 123.0(6) . . ?
C45 C46 C47 119.0(6) . . ?
C48 C47 C46 120.7(5) . . ?
C47 C48 O11 125.7(5) . . ?
C47 C48 C49 122.0(5) . . ?
O11 C48 C49 112.3(5) . . ?
O4 C49 C44 123.0(5) . . ?
O4 C49 C48 119.7(5) . . ?
C44 C49 C48 117.2(5) . . ?
N6 C51 C52 126.0(6) . . ?
C53 C52 C51 115.7(6) . . ?
C53 C52 C57 119.2(6) . . ?
C51 C52 C57 125.1(6) . . ?
C52 C53 C54 121.5(6) . . ?
C53 C54 C55 118.3(6) . . ?
C56 C55 C54 121.1(7) . . ?
C55 C56 O12 125.2(6) . . ?
C55 C56 C57 122.2(6) . . ?
O12 C56 C57 112.6(5) . . ?
O5 C57 C56 121.2(5) . . ?
O5 C57 C52 121.3(6) . . ?
C56 C57 C52 117.5(5) . . ?
C11 N1 C1 114.4(5) . . ?
C11 N1 Co1 126.8(4) . . ?
C1 N1 Co1 117.6(4) . . ?
C19 N2 C2 115.1(5) . . ?
C19 N2 Co1 127.7(4) . . ?
C2 N2 Co1 116.3(4) . . ?
C27 N3 C3 115.9(5) . . ?
C27 N3 Co1 126.6(4) . . ?
C3 N3 Co1 116.1(4) . . ?
C35 N4 C6 117.1(5) . . ?
C35 N4 Co2 125.1(4) . . ?
C6 N4 Co2 115.7(4) . . ?
C43 N5 C7 115.9(5) . . ?
C43 N5 Co2 126.8(4) . . ?
C7 N5 Co2 116.7(4) . . ?
C51 N6 C8 114.7(5) . . ?
C51 N6 Co2 126.8(4) . . ?
C8 N6 Co2 116.3(4) . . ?
O22 N7 O20 121.9(8) . . ?
O22 N7 O21 114.9(8) . . ?
O20 N7 O21 122.9(6) . . ?
C17 O1 Co1 132.9(4) . . ?
C17 O1 Dy1 131.8(3) . . ?
Co1 O1 Dy1 94.68(14) . . ?
C25 O2 Co1 130.4(3) . . ?
C25 O2 Dy1 135.0(3) . . ?
Co1 O2 Dy1 93.98(14) . . ?
C33 O3 Co1 131.5(4) . . ?
C33 O3 Dy1 132.0(3) . . ?
Co1 O3 Dy1 95.04(14) . . ?
C49 O4 Co2 131.9(3) . . ?
C49 O4 Dy1 130.8(3) . . ?
Co2 O4 Dy1 94.22(13) . . ?
C57 O5 Co2 132.3(4) . . ?
C57 O5 Dy1 132.4(4) . . ?
Co2 O5 Dy1 95.10(14) . . ?
C41 O6 Co2 130.1(3) . . ?
C41 O6 Dy1 135.0(3) . . ?
Co2 O6 Dy1 94.87(13) . . ?
C16 O7 C18 116.0(5) . . ?
C24 O8 C26 118.0(5) . . ?
C32 O9 C34 116.9(5) . . ?
C32 O9 Dy1 114.8(3) . . ?
C34 O9 Dy1 127.7(3) . . ?
C40 O10 C42 117.1(4) . . ?
C48 O11 C50 116.4(4) . . ?
C48 O11 Dy1 114.5(3) . . ?
C50 O11 Dy1 128.3(3) . . ?
C56 O12 C58 116.3(5) . . ?
C56 O12 Dy1 114.8(4) . . ?
C58 O12 Dy1 128.9(3) . . ?
O3 Co1 N1 119.07(17) . . ?
O3 Co1 O1 76.88(15) . . ?
N1 Co1 O1 85.22(16) . . ?
O3 Co1 N2 152.76(18) . . ?
N1 Co1 N2 85.69(19) . . ?
O1 Co1 N2 119.25(17) . . ?
O3 Co1 N3 85.34(17) . . ?
N1 Co1 N3 85.76(19) . . ?
O1 Co1 N3 152.87(18) . . ?
N2 Co1 N3 85.4(2) . . ?
O3 Co1 O2 77.33(14) . . ?
N1 Co1 O2 152.50(18) . . ?
O1 Co1 O2 77.01(14) . . ?
N2 Co1 O2 84.94(17) . . ?
N3 Co1 O2 119.11(17) . . ?
O3 Co1 Dy1 45.97(10) . . ?
N1 Co1 Dy1 128.44(13) . . ?
O1 Co1 Dy1 46.05(10) . . ?
N2 Co1 Dy1 128.17(14) . . ?
N3 Co1 Dy1 128.28(14) . . ?
O2 Co1 Dy1 45.99(10) . . ?
O5 Co2 O4 76.59(14) . . ?
O5 Co2 O6 76.25(14) . . ?
O4 Co2 O6 77.43(14) . . ?
O5 Co2 N4 121.05(18) . . ?
O4 Co2 N4 151.31(18) . . ?
O6 Co2 N4 84.91(17) . . ?
O5 Co2 N6 85.06(17) . . ?
O4 Co2 N6 119.85(17) . . ?
O6 Co2 N6 150.96(19) . . ?
N4 Co2 N6 86.01(19) . . ?
O5 Co2 N5 152.96(17) . . ?
O4 Co2 N5 85.83(17) . . ?
O6 Co2 N5 120.07(19) . . ?
N4 Co2 N5 83.7(2) . . ?
N6 Co2 N5 86.1(2) . . ?
O5 Co2 Dy1 45.59(10) . . ?
O4 Co2 Dy1 46.36(10) . . ?
O6 Co2 Dy1 45.44(9) . . ?
N4 Co2 Dy1 128.15(14) . . ?
N6 Co2 Dy1 128.31(14) . . ?
N5 Co2 Dy1 129.14(14) . . ?
O6 Dy1 O5 66.78(13) . . ?
O6 Dy1 O2 109.75(13) . . ?
O5 Dy1 O2 113.49(12) . . ?
O6 Dy1 O3 176.84(14) . . ?
O5 Dy1 O3 113.81(13) . . ?
O2 Dy1 O3 67.11(12) . . ?
O6 Dy1 O1 113.35(12) . . ?
O5 Dy1 O1 179.43(13) . . ?
O2 Dy1 O1 67.02(12) . . ?
O3 Dy1 O1 66.08(13) . . ?
O6 Dy1 O4 67.36(13) . . ?
O5 Dy1 O4 66.26(12) . . ?
O2 Dy1 O4 177.04(13) . . ?
O3 Dy1 O4 115.79(12) . . ?
O1 Dy1 O4 113.24(13) . . ?
O6 Dy1 O9 123.68(12) . . ?
O5 Dy1 O9 65.74(12) . . ?
O2 Dy1 O9 115.71(12) . . ?
O3 Dy1 O9 58.63(12) . . ?
O1 Dy1 O9 113.86(12) . . ?
O4 Dy1 O9 67.04(12) . . ?
O6 Dy1 O11 116.00(13) . . ?
O5 Dy1 O11 113.57(12) . . ?
O2 Dy1 O11 123.69(11) . . ?
O3 Dy1 O11 66.82(12) . . ?
O1 Dy1 O11 65.87(12) . . ?
O4 Dy1 O11 58.28(11) . . ?
O9 Dy1 O11 61.17(11) . . ?
O6 Dy1 O12 113.24(12) . . ?
O5 Dy1 O12 58.49(12) . . ?
O2 Dy1 O12 65.74(12) . . ?
O3 Dy1 O12 65.46(12) . . ?
O1 Dy1 O12 121.75(12) . . ?
O4 Dy1 O12 115.68(12) . . ?
O9 Dy1 O12 62.27(12) . . ?
O11 Dy1 O12 118.86(11) . . ?
O6 Dy1 Co2 39.69(9) . . ?
O5 Dy1 Co2 39.31(9) . . ?
O2 Dy1 Co2 138.58(8) . . ?
O3 Dy1 Co2 142.62(9) . . ?
O1 Dy1 Co2 140.47(9) . . ?
O4 Dy1 Co2 39.42(9) . . ?
O9 Dy1 Co2 84.01(8) . . ?
O11 Dy1 Co2 97.69(8) . . ?
O12 Dy1 Co2 97.76(8) . . ?
O6 Dy1 Co1 138.67(9) . . ?
O5 Dy1 Co1 140.98(9) . . ?
O2 Dy1 Co1 40.03(8) . . ?
O3 Dy1 Co1 38.98(9) . . ?
O1 Dy1 Co1 39.27(9) . . ?
O4 Dy1 Co1 141.91(9) . . ?
O9 Dy1 Co1 97.61(8) . . ?
O11 Dy1 Co1 83.67(8) . . ?
O12 Dy1 Co1 82.48(8) . . ?
Co2 Dy1 Co1 178.27(2) . . ?
#=============================================================END 
data_5

#----------------------------------------------------------------------------#
#                   CHEMICAL INFORMATION                                     #
#----------------------------------------------------------------------------#
 
_chemical_name_systematic
;
 ?
;
_chemical_formula_moiety                'C58 H60 Gd Mn2 N6 O12, N O3' 
_chemical_formula_sum                   'C58 H60 Gd Mn2 N7 O15'
_chemical_formula_weight                1362.26
_chemical_compound_source               'synthesis as described'
_chemical_absolute_configuration        ad
  
#----------------------------------------------------------------------------#
#                   UNIT CELL INFORMATION                                    #
#----------------------------------------------------------------------------#
 
_symmetry_cell_setting                 orthorhombic
_symmetry_space_group_name_H-M          'P 21 21 21'
_symmetry_space_group_name_Hall         'P 2ac 2ab'
_symmetry_Int_Tables_number             19
loop_
    _symmetry_equiv_pos_as_xyz
'x, y, z'
'-x+1/2, -y, z+1/2'
'x+1/2, -y+1/2, -z'
'-x, y+1/2, -z+1/2'
 
_cell_length_a                          15.6720(7)
_cell_length_b                          15.9438(7)
_cell_length_c                          24.5234(11)
_cell_angle_alpha                       90
_cell_angle_beta                        90
_cell_angle_gamma                       90
_cell_volume                            6127.7(5)
_cell_formula_units_Z                   4
_cell_measurement_temperature           180
_cell_measurement_reflns_used           9840
_cell_measurement_theta_min             2.7938
_cell_measurement_theta_max             32.1446
_cell_measurement_wavelength            0.71073
 
#----------------------------------------------------------------------------#
#                   CRYSTAL INFORMATION                                      #
#----------------------------------------------------------------------------#
 
_exptl_crystal_description              'double prism'
_exptl_crystal_colour                   'yellow green'
_exptl_crystal_size_max                 0.5
_exptl_crystal_size_mid                 0.375
_exptl_crystal_size_min                 0.125
_exptl_crystal_density_diffrn           1.477
_exptl_crystal_density_method           'not measured'
_exptl_crystal_F_000                    2764
_exptl_special_details
;
 ?
;
 
#----------------------------------------------------------------------------#
#                   ABSORPTION CORRECTION                                    #
#----------------------------------------------------------------------------#
 
_exptl_absorpt_coefficient_mu           1.545
_exptl_absorpt_correction_type          refdelf
_exptl_absorpt_process_details
;
        (See: Walker, N. & Stuart, D. (1983) Acta Cryst. A39, 158-166)
;
_exptl_absorpt_correction_T_min         0.406
_exptl_absorpt_correction_T_max         0.818

 
#----------------------------------------------------------------------------#
#                   DATA COLLECTION                                          #
#----------------------------------------------------------------------------#
 
_diffrn_ambient_temperature             180
_diffrn_radiation_type            MoK\a
_diffrn_radiation_source          'fine-focus sealed tube'
_diffrn_radiation_monochromator   graphite
_diffrn_measurement_device_type   'Oxford-Diffraction XCALIBUR'
_diffrn_measurement_method        \w-\f
_diffrn_detector_area_resol_mean  ?
_diffrn_standards_number          0
_diffrn_standards_interval_count  0
_diffrn_standards_interval_time   0
_diffrn_standards_decay_%         0
_diffrn_reflns_av_R_equivalents         0.0481
_diffrn_reflns_av_unetI/netI            0.041
_diffrn_reflns_number                   46726
_diffrn_reflns_limit_h_min              -19
_diffrn_reflns_limit_h_max              17
_diffrn_reflns_limit_k_min              -19
_diffrn_reflns_limit_k_max              19
_diffrn_reflns_limit_l_min              -29
_diffrn_reflns_limit_l_max              30
_diffrn_reflns_theta_min                2.8
_diffrn_reflns_theta_max                26.37
_diffrn_reflns_theta_full               26.37
_diffrn_measured_fraction_theta_full
                                        0.998
_diffrn_measured_fraction_theta_max
                                        0.998
_reflns_number_total                    12511
_reflns_number_gt                       11132
_reflns_threshold_expression            >2\s(I)
                             
#----------------------------------------------------------------------------#
#                   COMPUTER PROGRAMS USED                                   #
#----------------------------------------------------------------------------#
 
_computing_data_collection              'CrysAlis CCD, Oxford Diffraction Ltd.'
_computing_cell_refinement              'CrysAlis RED, Oxford Diffraction Ltd.'
_computing_data_reduction               'CrysAlis RED, Oxford Diffraction Ltd.'
_computing_structure_solution           'SIR92 (Giacovazzo et al, 1993)'
_computing_structure_refinement         'SHELXL-97 (Sheldrick, 1997)'
_computing_molecular_graphics           'Ortep-3 for Windows (Farrugia, 1997)'
_computing_publication_material
                                   'WinGX publication routines (Farrugia, 1999)'
 
#----------------------------------------------------------------------------#
#                   REFINEMENT INFORMATION                                   #
#----------------------------------------------------------------------------#
 
_refine_special_details
;
 Refinement of F^2^ against ALL reflections.  The weighted R-factor wR and
 goodness of fit S are based on F^2^, conventional R-factors R are based
 on F, with F set to zero for negative F^2^. The threshold expression of
 F^2^ > 2sigma(F^2^) is used only for calculating R-factors(gt) etc. and is
 not relevant to the choice of reflections for refinement.  R-factors based
 on F^2^ are statistically about twice as large as those based on F, and R-
 factors based on ALL data will be even larger.
;
_refine_ls_structure_factor_coef        Fsqd
_refine_ls_matrix_type                  full
_refine_ls_weighting_scheme             calc
_refine_ls_weighting_details
         'calc w=1/[\s^2^(Fo^2^)+(0.0626P)^2^+0.0000P] where P=(Fo^2^+2Fc^2^)/3'
_atom_sites_solution_primary            direct
_atom_sites_solution_secondary          difmap
_atom_sites_solution_hydrogens          geom
_refine_ls_hydrogen_treatment           constr
_refine_ls_extinction_method            none
_refine_ls_number_reflns                12511
_refine_ls_number_parameters            756
_refine_ls_number_restraints            0
_refine_ls_R_factor_all                 0.0411
_refine_ls_R_factor_gt                  0.0363
_refine_ls_wR_factor_ref                0.0997
_refine_ls_wR_factor_gt                 0.0968
_refine_ls_goodness_of_fit_ref          1.065
_refine_ls_restrained_S_all             1.065
_refine_ls_shift/su_max                 0.002
_refine_ls_shift/su_mean                0
_refine_ls_abs_structure_details
                                    'Flack H D (1983), Acta Cryst. A39, 876-881'
_refine_ls_abs_structure_Flack          -0.030(7)
_refine_diff_density_max                1.074
_refine_diff_density_min                -0.686
_refine_diff_density_rms                0.149
 
#----------------------------------------------------------------------------#
#                   ATOMIC TYPES, COORDINATES AND THERMAL PARAMETERS         #
#----------------------------------------------------------------------------#
 
loop_
    _atom_type_symbol
    _atom_type_description
    _atom_type_scat_dispersion_real
    _atom_type_scat_dispersion_imag
    _atom_type_scat_source
C C 0.0033 0.0016 'International Tables Vol C Tables 4.2.6.8 and 6.1.1.4'
H H 0 0 'International Tables Vol C Tables 4.2.6.8 and 6.1.1.4'
N N 0.0061 0.0033 'International Tables Vol C Tables 4.2.6.8 and 6.1.1.4'
O O 0.0106 0.006 'International Tables Vol C Tables 4.2.6.8 and 6.1.1.4'
Mn Mn 0.3368 0.7283 'International Tables Vol C Tables 4.2.6.8 and 6.1.1.4'
Gd Gd -0.1653 3.9035 'International Tables Vol C Tables 4.2.6.8 and 6.1.1.4'
 
loop_
    _atom_site_label
    _atom_site_type_symbol
    _atom_site_fract_x
    _atom_site_fract_y
    _atom_site_fract_z
    _atom_site_U_iso_or_equiv
    _atom_site_adp_type
    _atom_site_occupancy
    _atom_site_symmetry_multiplicity
    _atom_site_calc_flag
    _atom_site_refinement_flags
    _atom_site_disorder_assembly
    _atom_site_disorder_group
C1 C 0.9523(3) 0.1433(3) 0.38808(16) 0.0232(9) Uani 1 1 d . . .
C2 C 1.0137(3) 0.2080(3) 0.38843(19) 0.0285(10) Uani 1 1 d . . .
C3 C 0.9943(3) 0.2851(3) 0.36382(19) 0.0311(10) Uani 1 1 d . . .
H3 H 1.0351 0.3274 0.3642 0.037 Uiso 1 1 calc R . .
C4 C 0.9188(3) 0.2999(3) 0.3396(2) 0.0373(11) Uani 1 1 d . . .
H4 H 0.908 0.3517 0.3235 0.045 Uiso 1 1 calc R . .
C5 C 0.8564(3) 0.2368(3) 0.33870(19) 0.0318(10) Uani 1 1 d . . .
H5 H 0.8037 0.2465 0.3224 0.038 Uiso 1 1 calc R . .
C6 C 0.8742(3) 0.1606(3) 0.36222(17) 0.0269(10) Uani 1 1 d . . .
O12 O 0.8186(2) 0.0939(2) 0.36194(14) 0.0322(7) Uani 1 1 d . . .
C8 C 1.0992(3) 0.1998(3) 0.4106(2) 0.0322(10) Uani 1 1 d . . .
H8 H 1.1338 0.247 0.4081 0.039 Uiso 1 1 calc R . .
C9 C 1.2223(3) 0.1434(3) 0.4501(2) 0.0380(12) Uani 1 1 d . . .
H9A H 1.235 0.2024 0.4555 0.046 Uiso 1 1 calc R . .
H9B H 1.2587 0.1232 0.4209 0.046 Uiso 1 1 calc R . .
C10 C 1.2443(3) 0.0952(3) 0.5029(2) 0.0302(10) Uani 1 1 d . . .
C11 C 1.2626(3) 0.0014(3) 0.4907(2) 0.0366(12) Uani 1 1 d . . .
H11A H 1.3192 -0.0036 0.475 0.044 Uiso 1 1 calc R . .
H11B H 1.2623 -0.0297 0.5247 0.044 Uiso 1 1 calc R . .
C12 C 1.2306(3) -0.0902(3) 0.41898(19) 0.0316(11) Uani 1 1 d . . .
H12 H 1.2894 -0.0979 0.4195 0.038 Uiso 1 1 calc R . .
C13 C 1.1830(3) -0.1397(3) 0.38000(18) 0.0264(9) Uani 1 1 d . . .
C14 C 1.2306(3) -0.1990(3) 0.3501(2) 0.0353(11) Uani 1 1 d . . .
H14 H 1.2894 -0.2008 0.3547 0.042 Uiso 1 1 calc R . .
C15 C 1.1934(3) -0.2540(3) 0.31448(19) 0.0351(11) Uani 1 1 d . . .
H15 H 1.2263 -0.2935 0.2962 0.042 Uiso 1 1 calc R . .
C16 C 1.1047(3) -0.2501(3) 0.30594(18) 0.0314(10) Uani 1 1 d . . .
H16 H 1.0787 -0.2871 0.2818 0.038 Uiso 1 1 calc R . .
C17 C 1.0569(3) -0.1919(3) 0.33302(18) 0.0289(10) Uani 1 1 d . . .
C18 C 1.0930(3) -0.1364(3) 0.36969(18) 0.0301(11) Uani 1 1 d . . .
C19 C 0.6948(3) -0.0915(3) 0.2288(2) 0.0333(11) Uani 1 1 d . . .
H19 H 0.665 -0.0979 0.1963 0.04 Uiso 1 1 calc R . .
C20 C 0.7808(3) -0.0607(3) 0.22421(18) 0.0289(9) Uani 1 1 d . . .
C21 C 0.8072(3) -0.0376(3) 0.1714(2) 0.0365(11) Uani 1 1 d . . .
H21 H 0.7704 -0.0467 0.1422 0.044 Uiso 1 1 calc R . .
C22 C 0.8859(3) -0.0020(3) 0.16159(19) 0.0374(11) Uani 1 1 d . . .
H22 H 0.9018 0.0127 0.1263 0.045 Uiso 1 1 calc R . .
C23 C 0.9414(3) 0.0117(3) 0.20504(19) 0.0324(11) Uani 1 1 d . . .
H23 H 0.9942 0.0367 0.1991 0.039 Uiso 1 1 calc R . .
C24 C 0.9179(3) -0.0116(3) 0.25662(19) 0.0283(10) Uani 1 1 d . . .
C25 C 0.8376(3) -0.0498(3) 0.26804(17) 0.0256(9) Uani 1 1 d . . .
C26 C 0.5648(3) -0.1343(3) 0.2653(2) 0.0352(11) Uani 1 1 d . . .
H26A H 0.5538 -0.1449 0.227 0.042 Uiso 1 1 calc R . .
H26B H 0.5293 -0.0875 0.2765 0.042 Uiso 1 1 calc R . .
C27 C 0.5388(3) -0.2141(3) 0.29919(19) 0.0303(10) Uani 1 1 d . . .
C28 C 0.6053(3) -0.2835(3) 0.2936(2) 0.0414(12) Uani 1 1 d . . .
H28A H 0.5789 -0.3366 0.303 0.05 Uiso 1 1 calc R . .
H28B H 0.6231 -0.2868 0.2558 0.05 Uiso 1 1 calc R . .
C29 C 0.7223(3) -0.3392(3) 0.34210(19) 0.0324(11) Uani 1 1 d . . .
H29 H 0.6983 -0.3897 0.3309 0.039 Uiso 1 1 calc R . .
C30 C 0.8009(3) -0.3451(3) 0.37325(19) 0.0299(10) Uani 1 1 d . . .
C31 C 0.8440(3) -0.2757(3) 0.39630(18) 0.0267(10) Uani 1 1 d . . .
C32 C 0.9212(3) -0.2933(3) 0.42495(18) 0.0274(10) Uani 1 1 d . . .
C33 C 0.8378(3) -0.4260(3) 0.37702(19) 0.0345(11) Uani 1 1 d . . .
H33 H 0.8103 -0.4714 0.3609 0.041 Uiso 1 1 calc R . .
C34 C 1.0316(3) -0.2347(3) 0.4800(2) 0.0353(11) Uani 1 1 d . . .
H34A H 1.0184 -0.2729 0.509 0.053 Uiso 1 1 calc R . .
H34B H 1.0497 -0.182 0.495 0.053 Uiso 1 1 calc R . .
H34C H 1.0766 -0.2577 0.458 0.053 Uiso 1 1 calc R . .
C35 C 0.8643(3) -0.0989(3) 0.55247(19) 0.0308(10) Uani 1 1 d . . .
C36 C 0.8343(3) -0.1079(3) 0.6047(2) 0.0368(11) Uani 1 1 d . . .
H36 H 0.7828 -0.1352 0.611 0.044 Uiso 1 1 calc R . .
C37 C 0.8816(3) -0.0756(3) 0.64866(19) 0.0403(12) Uani 1 1 d . . .
H37 H 0.8612 -0.0815 0.6841 0.048 Uiso 1 1 calc R . .
C38 C 0.9562(4) -0.0362(3) 0.6399(2) 0.0394(12) Uani 1 1 d . . .
H38 H 0.9873 -0.0166 0.6695 0.047 Uiso 1 1 calc R . .
C39 C 0.9883(3) -0.0240(3) 0.58690(19) 0.0341(11) Uani 1 1 d . . .
C40 C 0.9420(3) -0.0557(3) 0.54112(17) 0.0272(9) Uani 1 1 d . . .
C041 C 0.8546(3) 0.1166(3) 0.5117(2) 0.0335(11) Uani 1 1 d . . .
H04A H 0.8335 0.1709 0.5015 0.05 Uiso 1 1 calc R . .
H04B H 0.915 0.1142 0.5056 0.05 Uiso 1 1 calc R . .
H04C H 0.843 0.1069 0.5497 0.05 Uiso 1 1 calc R . .
C41 C 1.0660(3) 0.0241(3) 0.5825(2) 0.0391(12) Uani 1 1 d . . .
H41 H 1.0938 0.0361 0.6151 0.047 Uiso 1 1 calc R . .
N3 N 1.1014(3) 0.0524(3) 0.53908(15) 0.0353(9) Uani 1 1 d . . .
C43 C 0.5532(3) -0.0795(3) 0.4161(2) 0.0337(11) Uani 1 1 d . . .
H43 H 0.4941 -0.0776 0.4193 0.04 Uiso 1 1 calc R . .
C44 C 0.5992(3) -0.0184(3) 0.44751(18) 0.0298(10) Uani 1 1 d . . .
C45 C 0.6910(3) -0.0077(3) 0.44748(19) 0.0304(11) Uani 1 1 d . . .
C46 C 0.7260(3) 0.0522(3) 0.48246(18) 0.0289(10) Uani 1 1 d . . .
C47 C 0.6765(3) 0.0994(3) 0.5156(2) 0.0359(11) Uani 1 1 d . . .
H47 H 0.7021 0.1375 0.5393 0.043 Uiso 1 1 calc R . .
C49 C 0.5507(3) 0.0331(3) 0.4817(2) 0.0384(12) Uani 1 1 d . . .
H49 H 0.4917 0.0275 0.4819 0.046 Uiso 1 1 calc R . .
C50 C 0.9120(3) -0.4384(3) 0.4035(2) 0.0384(11) Uani 1 1 d . . .
H50 H 0.9351 -0.492 0.4053 0.046 Uiso 1 1 calc R . .
N1 N 1.2001(3) -0.0366(3) 0.45303(17) 0.0345(9) Uani 1 1 d . . .
N2 N 1.1326(2) 0.1352(3) 0.43300(18) 0.0359(10) Uani 1 1 d . . .
N6 N 0.6546(2) -0.1111(3) 0.27214(16) 0.0308(9) Uani 1 1 d . . .
N4 N 0.6815(3) -0.2717(2) 0.32804(17) 0.0342(9) Uani 1 1 d . . .
N5 N 0.5826(2) -0.1362(3) 0.38403(16) 0.0333(9) Uani 1 1 d . . .
C53 C 0.4556(3) -0.2459(4) 0.2735(2) 0.0449(14) Uani 1 1 d . . .
H53A H 0.4674 -0.2684 0.238 0.067 Uiso 1 1 calc R . .
H53B H 0.4159 -0.2004 0.2704 0.067 Uiso 1 1 calc R . .
H53C H 0.4316 -0.289 0.2961 0.067 Uiso 1 1 calc R . .
O1 O 0.96486(17) 0.06854(18) 0.40926(12) 0.0256(6) Uani 1 1 d . . .
O2 O 1.04396(18) -0.08120(18) 0.39729(12) 0.0253(7) Uani 1 1 d . . .
O3 O 0.96581(19) -0.0465(2) 0.49031(12) 0.0281(7) Uani 1 1 d . . .
O4 O 0.81973(18) -0.0722(2) 0.31840(11) 0.0265(6) Uani 1 1 d . . .
O5 O 0.73978(18) -0.05289(19) 0.41433(12) 0.0271(7) Uani 1 1 d . . .
O6 O 0.81745(18) -0.19790(18) 0.39338(12) 0.0257(7) Uani 1 1 d . . .
O7 O 0.97105(19) -0.1817(2) 0.32791(13) 0.0284(7) Uani 1 1 d . . .
O8 O 0.9570(2) -0.22190(19) 0.44685(13) 0.0298(7) Uani 1 1 d . . .
O9 O 0.81344(19) 0.0539(2) 0.47991(13) 0.0304(7) Uani 1 1 d . . .
O10 O 0.8247(2) -0.1272(2) 0.50644(13) 0.0321(7) Uani 1 1 d . . .
O11 O 0.9672(2) -0.0008(2) 0.30238(13) 0.0302(7) Uani 1 1 d . . .
Mn1 Mn 1.07160(4) 0.01637(4) 0.45441(3) 0.02444(15) Uani 1 1 d . . .
Mn2 Mn 0.71250(4) -0.14167(4) 0.35090(3) 0.02449(15) Uani 1 1 d . . .
Gd1 Gd 0.891750(14) -0.064960(14) 0.404654(9) 0.02691(7) Uani 1 1 d . . .
C51 C 0.9546(3) -0.3715(3) 0.4284(2) 0.0317(10) Uani 1 1 d . . .
H51 H 1.0054 -0.3807 0.447 0.038 Uiso 1 1 calc R . .
C52 C 0.5200(3) -0.1930(3) 0.3584(2) 0.0385(12) Uani 1 1 d . . .
H52A H 0.464 -0.1673 0.3605 0.046 Uiso 1 1 calc R . .
H52B H 0.518 -0.2447 0.3792 0.046 Uiso 1 1 calc R . .
C42 C 1.1759(3) 0.1069(4) 0.5466(2) 0.0450(13) Uani 1 1 d . . .
H42A H 1.2008 0.0957 0.582 0.054 Uiso 1 1 calc R . .
H42B H 1.1572 0.1649 0.5463 0.054 Uiso 1 1 calc R . .
C54 C 1.3276(3) 0.1335(4) 0.5253(3) 0.0459(14) Uani 1 1 d . . .
H54A H 1.3502 0.0978 0.5533 0.069 Uiso 1 1 calc R . .
H54B H 1.3159 0.188 0.5403 0.069 Uiso 1 1 calc R . .
H54C H 1.3684 0.1386 0.4964 0.069 Uiso 1 1 calc R . .
C57 C 1.0499(3) 0.0332(3) 0.2948(2) 0.0355(12) Uani 1 1 d . . .
H57A H 1.0825 -0.0032 0.2716 0.053 Uiso 1 1 calc R . .
H57B H 1.0779 0.0384 0.3294 0.053 Uiso 1 1 calc R . .
H57C H 1.0454 0.0876 0.2781 0.053 Uiso 1 1 calc R . .
C56 C 0.7496(3) -0.1747(3) 0.5137(2) 0.0401(12) Uani 1 1 d . . .
H56A H 0.762 -0.2232 0.5355 0.06 Uiso 1 1 calc R . .
H56B H 0.7282 -0.1922 0.4788 0.06 Uiso 1 1 calc R . .
H56C H 0.7074 -0.141 0.5318 0.06 Uiso 1 1 calc R . .
C55 C 0.9312(3) -0.2333(3) 0.28656(19) 0.0328(10) Uani 1 1 d . . .
H55A H 0.9558 -0.2208 0.2516 0.049 Uiso 1 1 calc R . .
H55B H 0.871 -0.2219 0.2856 0.049 Uiso 1 1 calc R . .
H55C H 0.9403 -0.2914 0.295 0.049 Uiso 1 1 calc R . .
C48 C 0.5883(3) 0.0920(4) 0.5149(2) 0.0478(15) Uani 1 1 d . . .
H48 H 0.5548 0.1266 0.5368 0.057 Uiso 1 1 calc R . .
O20 O 0.3999(3) 0.0560(3) 0.3847(2) 0.0705(13) Uani 1 1 d . . .
N20 N 0.3995(4) 0.0271(4) 0.3388(2) 0.0629(14) Uani 1 1 d . . .
O22 O 0.3803(4) -0.0443(3) 0.3279(2) 0.0817(15) Uani 1 1 d . . .
O21 O 0.4279(7) 0.0658(5) 0.3005(3) 0.158(4) Uani 1 1 d . . .
C58 C 0.7397(3) 0.1058(3) 0.3349(2) 0.0352(11) Uani 1 1 d . . .
H58A H 0.7087 0.1504 0.3522 0.053 Uiso 1 1 calc R . .
H58B H 0.7069 0.055 0.3367 0.053 Uiso 1 1 calc R . .
H58C H 0.75 0.12 0.2974 0.053 Uiso 1 1 calc R . .
 
loop_
    _atom_site_aniso_label
    _atom_site_aniso_U_11
    _atom_site_aniso_U_22
    _atom_site_aniso_U_33
    _atom_site_aniso_U_23
    _atom_site_aniso_U_13
    _atom_site_aniso_U_12
C1 0.028(2) 0.021(2) 0.021(2) -0.0051(17) -0.0031(16) 0.0008(18)
C2 0.025(2) 0.026(2) 0.034(3) -0.0037(19) 0.0011(18) 0.0052(19)
C3 0.038(3) 0.024(2) 0.031(3) -0.0024(19) -0.003(2) -0.004(2)
C4 0.047(3) 0.025(2) 0.040(3) 0.002(2) -0.005(2) 0.004(2)
C5 0.036(2) 0.029(2) 0.031(3) 0.001(2) -0.010(2) 0.004(2)
C6 0.036(3) 0.026(2) 0.018(2) -0.0047(17) 0.0025(17) -0.0039(19)
O12 0.0285(16) 0.0286(17) 0.0395(19) 0.0060(14) -0.0071(14) -0.0006(14)
C8 0.033(2) 0.023(2) 0.040(3) -0.001(2) -0.005(2) -0.0060(19)
C9 0.031(3) 0.037(3) 0.045(3) 0.001(2) -0.009(2) -0.009(2)
C10 0.028(2) 0.028(2) 0.034(3) -0.008(2) -0.0119(19) -0.0013(19)
C11 0.031(3) 0.036(3) 0.043(3) -0.005(2) -0.013(2) 0.001(2)
C12 0.027(2) 0.034(3) 0.034(3) 0.002(2) -0.0038(18) -0.0020(19)
C13 0.028(2) 0.028(2) 0.023(2) 0.0019(19) -0.0013(17) -0.004(2)
C14 0.028(2) 0.044(3) 0.034(3) -0.003(2) 0.002(2) 0.004(2)
C15 0.040(3) 0.038(3) 0.027(2) -0.006(2) 0.004(2) 0.012(2)
C16 0.036(2) 0.031(2) 0.027(2) -0.0043(19) -0.004(2) 0.000(2)
C17 0.032(3) 0.033(3) 0.022(2) 0.0026(19) -0.0007(18) 0.000(2)
C18 0.039(3) 0.019(2) 0.033(2) 0.0118(18) 0.028(2) 0.012(2)
C19 0.031(2) 0.036(3) 0.032(3) -0.001(2) -0.009(2) 0.004(2)
C20 0.030(2) 0.029(2) 0.028(2) 0.000(2) 0.0003(17) -0.003(2)
C21 0.039(3) 0.042(3) 0.029(2) 0.001(2) -0.007(2) 0.000(2)
C22 0.038(3) 0.045(3) 0.030(2) 0.007(2) 0.000(2) -0.008(2)
C23 0.035(3) 0.032(3) 0.030(3) 0.006(2) 0.006(2) -0.003(2)
C24 0.030(2) 0.024(2) 0.031(2) 0.0035(19) 0.0008(18) 0.0019(18)
C25 0.026(2) 0.029(2) 0.022(2) -0.0033(18) 0.0008(16) 0.0045(18)
C26 0.028(2) 0.044(3) 0.033(3) 0.009(2) -0.005(2) -0.002(2)
C27 0.022(2) 0.035(3) 0.034(3) -0.002(2) -0.0022(19) -0.009(2)
C28 0.039(3) 0.042(3) 0.043(3) -0.004(2) -0.010(3) -0.014(3)
C29 0.037(3) 0.029(2) 0.031(3) -0.006(2) 0.004(2) -0.009(2)
C30 0.034(2) 0.024(2) 0.032(3) -0.0001(19) 0.0031(19) -0.005(2)
C31 0.029(2) 0.022(2) 0.029(3) 0.0048(18) -0.0001(18) -0.0025(17)
C32 0.027(2) 0.030(2) 0.026(2) 0.0010(18) 0.0019(17) 0.0019(19)
C33 0.038(3) 0.032(3) 0.034(3) -0.007(2) 0.008(2) -0.005(2)
C34 0.034(3) 0.037(3) 0.035(3) -0.001(2) -0.014(2) 0.006(2)
C35 0.035(3) 0.029(2) 0.028(2) -0.005(2) 0.0019(19) 0.0060(19)
C36 0.043(3) 0.033(3) 0.035(3) 0.006(2) 0.005(2) 0.001(2)
C37 0.059(3) 0.037(3) 0.024(2) 0.004(2) 0.008(2) 0.008(3)
C38 0.058(3) 0.036(3) 0.024(2) -0.005(2) -0.006(2) 0.013(2)
C39 0.042(3) 0.031(2) 0.029(3) 0.001(2) -0.003(2) 0.005(2)
C40 0.031(2) 0.029(2) 0.022(2) -0.001(2) 0.0006(17) 0.004(2)
C041 0.037(3) 0.027(2) 0.037(3) -0.007(2) -0.004(2) -0.001(2)
C41 0.044(3) 0.039(3) 0.034(3) -0.008(2) -0.014(2) 0.007(2)
N3 0.036(2) 0.040(2) 0.030(2) -0.0062(18) -0.0054(17) -0.002(2)
C43 0.023(2) 0.042(3) 0.036(3) 0.005(2) 0.0029(18) -0.002(2)
C44 0.024(2) 0.037(2) 0.028(2) 0.001(2) -0.0009(19) 0.000(2)
C45 0.036(3) 0.030(2) 0.025(2) 0.017(2) 0.0134(19) 0.022(2)
C46 0.031(2) 0.028(3) 0.028(2) 0.000(2) 0.0033(18) 0.002(2)
C47 0.040(3) 0.033(3) 0.034(3) -0.012(2) 0.000(2) 0.004(2)
C49 0.028(2) 0.051(3) 0.036(3) -0.006(2) 0.004(2) 0.005(2)
C50 0.043(3) 0.027(2) 0.045(3) -0.002(3) 0.011(2) 0.008(2)
N1 0.036(2) 0.032(2) 0.035(2) -0.0036(18) -0.0056(18) -0.0031(18)
N2 0.029(2) 0.032(2) 0.046(2) -0.0006(19) -0.0042(17) -0.0010(17)
N6 0.026(2) 0.035(2) 0.031(2) 0.0039(17) -0.0004(16) -0.0045(17)
N4 0.037(2) 0.025(2) 0.040(2) 0.0000(18) -0.0052(18) -0.0025(18)
N5 0.030(2) 0.035(2) 0.034(2) 0.0058(19) -0.0004(16) -0.0082(18)
C53 0.030(3) 0.054(3) 0.051(3) 0.001(3) -0.007(2) -0.015(3)
O1 0.0257(14) 0.0192(13) 0.0319(16) 0.0022(16) -0.0022(12) -0.0007(12)
O2 0.0236(14) 0.0255(16) 0.0270(16) -0.0014(13) 0.0004(12) -0.0003(12)
O3 0.0275(15) 0.0327(18) 0.0241(16) 0.0003(13) 0.0015(12) -0.0031(13)
O4 0.0239(14) 0.0337(17) 0.0219(15) 0.0053(14) -0.0007(11) -0.0056(15)
O5 0.0255(15) 0.0255(16) 0.0303(17) 0.0017(14) -0.0021(12) 0.0003(13)
O6 0.0268(15) 0.0211(15) 0.0291(17) 0.0021(12) -0.0056(12) -0.0013(13)
O7 0.0280(16) 0.0266(17) 0.0307(18) -0.0078(14) -0.0033(13) -0.0052(13)
O8 0.0304(17) 0.0252(16) 0.0339(18) -0.0018(14) -0.0071(14) 0.0010(13)
O9 0.0278(15) 0.0283(17) 0.0351(17) -0.0068(15) -0.0006(13) -0.0004(14)
O10 0.0303(17) 0.0363(19) 0.0299(17) 0.0003(14) 0.0012(13) -0.0086(15)
O11 0.0281(16) 0.0340(19) 0.0286(17) 0.0010(14) -0.0003(13) -0.0078(14)
Mn1 0.0248(3) 0.0221(3) 0.0263(4) -0.0025(3) -0.0039(3) -0.0005(3)
Mn2 0.0235(3) 0.0245(3) 0.0254(3) 0.0009(3) -0.0009(3) -0.0027(3)
Gd1 0.02407(10) 0.02700(11) 0.02967(11) -0.00137(10) -0.00219(9) -0.00206(9)
C51 0.028(2) 0.029(2) 0.038(3) 0.006(2) 0.0031(19) 0.000(2)
C52 0.038(3) 0.033(3) 0.044(3) 0.002(2) -0.002(2) -0.013(2)
C42 0.040(3) 0.042(3) 0.054(3) -0.014(3) -0.006(3) -0.009(2)
C54 0.032(3) 0.041(3) 0.065(4) -0.011(3) -0.016(3) -0.003(2)
C57 0.024(2) 0.043(3) 0.039(3) 0.010(2) -0.001(2) -0.005(2)
C56 0.038(3) 0.043(3) 0.039(3) 0.000(2) 0.005(2) -0.010(2)
C55 0.037(3) 0.034(3) 0.027(2) -0.007(2) -0.004(2) -0.006(2)
C48 0.038(3) 0.058(4) 0.047(3) -0.015(3) 0.006(2) 0.021(3)
O20 0.078(3) 0.071(3) 0.062(3) -0.014(2) -0.011(2) 0.013(3)
N20 0.086(4) 0.050(3) 0.053(3) 0.009(3) -0.004(3) 0.010(3)
O22 0.080(4) 0.066(3) 0.099(4) -0.025(3) 0.011(3) -0.006(3)
O21 0.275(11) 0.100(5) 0.100(5) 0.041(5) 0.053(6) 0.002(7)
C58 0.027(2) 0.036(3) 0.043(3) -0.003(2) -0.003(2) 0.006(2)
 
 
#----------------------------------------------------------------------------#
#                   MOLECULAR GEOMETRY                                       #
#----------------------------------------------------------------------------#
 
_geom_special_details
;
 All esds (except the esd in the dihedral angle between two l.s. planes)
 are estimated using the full covariance matrix.  The cell esds are taken
 into account individually in the estimation of esds in distances, angles
 and torsion angles; correlations between esds in cell parameters are only
 used when they are defined by crystal symmetry.  An approximate (isotropic)
 treatment of cell esds is used for estimating esds involving l.s. planes.
;
loop_
    _geom_bond_atom_site_label_1
    _geom_bond_atom_site_label_2
    _geom_bond_distance
    _geom_bond_site_symmetry_2
    _geom_bond_publ_flag
C1 O1 1.315(5) . ?
C1 C6 1.406(6) . ?
C1 C2 1.410(6) . ?
C2 C3 1.402(7) . ?
C2 C8 1.453(6) . ?
C3 C4 1.346(7) . ?
C4 C5 1.403(7) . ?
C5 C6 1.375(6) . ?
C6 O12 1.374(5) . ?
O12 C58 1.416(5) . ?
C8 N2 1.278(6) . ?
C9 N2 1.473(6) . ?
C9 C10 1.546(7) . ?
C10 C42 1.527(7) . ?
C10 C54 1.542(6) . ?
C10 C11 1.552(7) . ?
C11 N1 1.477(6) . ?
C12 N1 1.287(6) . ?
C12 C13 1.447(6) . ?
C13 C14 1.410(7) . ?
C13 C18 1.433(6) . ?
C14 C15 1.368(7) . ?
C15 C16 1.407(7) . ?
C16 C17 1.365(7) . ?
C17 O7 1.361(5) . ?
C17 C18 1.383(7) . ?
C18 O2 1.351(5) . ?
C19 N6 1.274(6) . ?
C19 C20 1.439(6) . ?
C20 C25 1.406(6) . ?
C20 C21 1.409(7) . ?
C21 C22 1.380(7) . ?
C22 C23 1.393(7) . ?
C23 C24 1.369(7) . ?
C24 O11 1.373(6) . ?
C24 C25 1.425(6) . ?
C25 O4 1.316(5) . ?
C26 N6 1.465(6) . ?
C26 C27 1.573(7) . ?
C27 C52 1.520(7) . ?
C27 C28 1.526(7) . ?
C27 C53 1.534(6) . ?
C28 N4 1.474(6) . ?
C29 N4 1.298(6) . ?
C29 C30 1.453(7) . ?
C30 C31 1.414(6) . ?
C30 C33 1.417(7) . ?
C31 O6 1.310(5) . ?
C31 C32 1.427(6) . ?
C32 C51 1.356(7) . ?
C32 O8 1.378(6) . ?
C33 C50 1.346(7) . ?
C34 O8 1.438(5) . ?
C35 O10 1.365(6) . ?
C35 C36 1.372(7) . ?
C35 C40 1.426(7) . ?
C36 C37 1.407(7) . ?
C37 C38 1.344(7) . ?
C38 C39 1.406(7) . ?
C39 C40 1.429(6) . ?
C39 C41 1.444(7) . ?
C40 O3 1.309(5) . ?
C041 O9 1.423(5) . ?
C41 N3 1.282(7) . ?
N3 C42 1.468(6) . ?
N3 Mn1 2.204(4) . ?
C43 N5 1.285(6) . ?
C43 C44 1.436(7) . ?
C44 C49 1.398(7) . ?
C44 C45 1.450(6) . ?
C45 O5 1.328(5) . ?
C45 C46 1.395(7) . ?
C46 C47 1.352(7) . ?
C46 O9 1.373(5) . ?
C47 C48 1.388(8) . ?
C49 C48 1.376(8) . ?
C50 C51 1.398(7) . ?
N1 Mn1 2.184(4) . ?
N2 Mn1 2.187(4) . ?
N6 Mn2 2.189(4) . ?
N4 Mn2 2.202(4) . ?
N5 C52 1.474(6) . ?
N5 Mn2 2.194(4) . ?
O1 Mn1 2.172(3) . ?
O1 Gd1 2.420(3) . ?
O2 Mn1 2.138(3) . ?
O2 Gd1 2.406(3) . ?
O3 Mn1 2.128(3) . ?
O3 Gd1 2.418(3) . ?
O4 Mn2 2.165(3) . ?
O4 Gd1 2.400(3) . ?
O5 Mn2 2.146(3) . ?
O5 Gd1 2.401(3) . ?
O6 Mn2 2.143(3) . ?
O6 Gd1 2.434(3) . ?
O7 C55 1.448(5) . ?
O7 Gd1 2.924(3) . ?
O8 Gd1 2.895(3) . ?
O9 Gd1 2.916(3) . ?
O10 C56 1.411(6) . ?
O10 Gd1 2.885(3) . ?
O11 C57 1.418(5) . ?
Mn1 Gd1 3.3339(7) . ?
Mn2 Gd1 3.3355(7) . ?
O20 N20 1.217(7) . ?
N20 O22 1.208(7) . ?
N20 O21 1.208(8) . ?
 
loop_
    _geom_angle_atom_site_label_1
    _geom_angle_atom_site_label_2
    _geom_angle_atom_site_label_3
    _geom_angle
    _geom_angle_site_symmetry_1
    _geom_angle_site_symmetry_3
    _geom_angle_publ_flag
O1 C1 C6 119.0(4) . . ?
O1 C1 C2 124.0(4) . . ?
C6 C1 C2 116.9(4) . . ?
C3 C2 C1 119.4(4) . . ?
C3 C2 C8 116.1(4) . . ?
C1 C2 C8 124.4(4) . . ?
C4 C3 C2 122.3(5) . . ?
C3 C4 C5 119.6(4) . . ?
C6 C5 C4 119.1(4) . . ?
O12 C6 C5 123.5(4) . . ?
O12 C6 C1 113.8(4) . . ?
C5 C6 C1 122.7(4) . . ?
C6 O12 C58 117.0(4) . . ?
N2 C8 C2 127.7(4) . . ?
N2 C9 C10 114.0(4) . . ?
C42 C10 C54 107.2(4) . . ?
C42 C10 C9 111.7(4) . . ?
C54 C10 C9 106.9(4) . . ?
C42 C10 C11 112.5(4) . . ?
C54 C10 C11 107.1(4) . . ?
C9 C10 C11 111.0(4) . . ?
N1 C11 C10 113.2(4) . . ?
N1 C12 C13 126.8(4) . . ?
C14 C13 C18 117.0(4) . . ?
C14 C13 C12 115.9(4) . . ?
C18 C13 C12 127.1(4) . . ?
C15 C14 C13 122.5(4) . . ?
C14 C15 C16 119.1(4) . . ?
C17 C16 C15 120.0(4) . . ?
O7 C17 C16 125.4(4) . . ?
O7 C17 C18 112.8(4) . . ?
C16 C17 C18 121.8(4) . . ?
O2 C18 C17 120.7(4) . . ?
O2 C18 C13 119.7(4) . . ?
C17 C18 C13 119.6(4) . . ?
N6 C19 C20 127.7(4) . . ?
C25 C20 C21 119.0(4) . . ?
C25 C20 C19 125.2(4) . . ?
C21 C20 C19 115.8(4) . . ?
C22 C21 C20 122.0(4) . . ?
C21 C22 C23 119.4(4) . . ?
C24 C23 C22 119.7(4) . . ?
C23 C24 O11 124.7(4) . . ?
C23 C24 C25 122.4(4) . . ?
O11 C24 C25 112.9(4) . . ?
O4 C25 C20 123.3(4) . . ?
O4 C25 C24 119.2(4) . . ?
C20 C25 C24 117.5(4) . . ?
N6 C26 C27 113.1(4) . . ?
C52 C27 C28 112.2(4) . . ?
C52 C27 C53 107.5(4) . . ?
C28 C27 C53 107.6(4) . . ?
C52 C27 C26 112.1(4) . . ?
C28 C27 C26 111.3(4) . . ?
C53 C27 C26 105.7(4) . . ?
N4 C28 C27 114.1(4) . . ?
N4 C29 C30 127.6(4) . . ?
C31 C30 C33 119.4(4) . . ?
C31 C30 C29 124.4(4) . . ?
C33 C30 C29 116.1(4) . . ?
O6 C31 C30 124.6(4) . . ?
O6 C31 C32 118.8(4) . . ?
C30 C31 C32 116.6(4) . . ?
C51 C32 O8 125.3(4) . . ?
C51 C32 C31 122.6(4) . . ?
O8 C32 C31 112.0(4) . . ?
C50 C33 C30 121.2(5) . . ?
O10 C35 C36 125.5(5) . . ?
O10 C35 C40 112.7(4) . . ?
C36 C35 C40 121.7(4) . . ?
C35 C36 C37 119.8(5) . . ?
C38 C37 C36 120.4(5) . . ?
C37 C38 C39 121.6(5) . . ?
C38 C39 C40 119.7(5) . . ?
C38 C39 C41 116.4(5) . . ?
C40 C39 C41 123.9(4) . . ?
O3 C40 C35 118.9(4) . . ?
O3 C40 C39 124.3(4) . . ?
C35 C40 C39 116.8(4) . . ?
N3 C41 C39 127.8(5) . . ?
C41 N3 C42 116.6(4) . . ?
C41 N3 Mn1 126.8(3) . . ?
C42 N3 Mn1 116.2(3) . . ?
N5 C43 C44 128.7(4) . . ?
C49 C44 C43 116.6(4) . . ?
C49 C44 C45 118.0(4) . . ?
C43 C44 C45 125.4(4) . . ?
O5 C45 C46 121.5(4) . . ?
O5 C45 C44 120.5(5) . . ?
C46 C45 C44 118.0(4) . . ?
C47 C46 O9 126.0(4) . . ?
C47 C46 C45 121.7(4) . . ?
O9 C46 C45 112.2(4) . . ?
C46 C47 C48 121.1(5) . . ?
C48 C49 C44 121.7(5) . . ?
C33 C50 C51 120.8(5) . . ?
C12 N1 C11 115.5(4) . . ?
C12 N1 Mn1 127.6(3) . . ?
C11 N1 Mn1 116.4(3) . . ?
C8 N2 C9 116.2(4) . . ?
C8 N2 Mn1 128.5(3) . . ?
C9 N2 Mn1 115.2(3) . . ?
C19 N6 C26 116.2(4) . . ?
C19 N6 Mn2 125.9(3) . . ?
C26 N6 Mn2 116.3(3) . . ?
C29 N4 C28 116.4(4) . . ?
C29 N4 Mn2 127.1(3) . . ?
C28 N4 Mn2 116.4(3) . . ?
C43 N5 C52 117.0(4) . . ?
C43 N5 Mn2 126.0(3) . . ?
C52 N5 Mn2 115.8(3) . . ?
C1 O1 Mn1 131.6(3) . . ?
C1 O1 Gd1 135.1(3) . . ?
Mn1 O1 Gd1 92.96(11) . . ?
C18 O2 Mn1 133.4(3) . . ?
C18 O2 Gd1 132.2(3) . . ?
Mn1 O2 Gd1 94.21(11) . . ?
C40 O3 Mn1 132.0(3) . . ?
C40 O3 Gd1 132.5(3) . . ?
Mn1 O3 Gd1 94.12(11) . . ?
C25 O4 Mn2 130.5(3) . . ?
C25 O4 Gd1 135.6(3) . . ?
Mn2 O4 Gd1 93.75(10) . . ?
C45 O5 Mn2 133.4(3) . . ?
C45 O5 Gd1 132.4(3) . . ?
Mn2 O5 Gd1 94.19(11) . . ?
C31 O6 Mn2 131.8(3) . . ?
C31 O6 Gd1 131.8(3) . . ?
Mn2 O6 Gd1 93.33(11) . . ?
C17 O7 C55 115.0(4) . . ?
C17 O7 Gd1 115.9(3) . . ?
C55 O7 Gd1 129.0(3) . . ?
C32 O8 C34 115.8(4) . . ?
C32 O8 Gd1 115.5(2) . . ?
C34 O8 Gd1 127.7(3) . . ?
C46 O9 C041 116.2(4) . . ?
C46 O9 Gd1 115.8(3) . . ?
C041 O9 Gd1 127.8(3) . . ?
C35 O10 C56 116.9(4) . . ?
C35 O10 Gd1 115.8(3) . . ?
C56 O10 Gd1 126.7(3) . . ?
C24 O11 C57 117.1(4) . . ?
O3 Mn1 O2 76.73(12) . . ?
O3 Mn1 O1 77.94(11) . . ?
O2 Mn1 O1 77.79(11) . . ?
O3 Mn1 N1 122.86(14) . . ?
O2 Mn1 N1 83.99(13) . . ?
O1 Mn1 N1 148.27(14) . . ?
O3 Mn1 N2 148.00(14) . . ?
O2 Mn1 N2 124.20(14) . . ?
O1 Mn1 N2 83.24(13) . . ?
N1 Mn1 N2 85.91(15) . . ?
O3 Mn1 N3 84.14(14) . . ?
O2 Mn1 N3 148.17(14) . . ?
O1 Mn1 N3 122.93(14) . . ?
N1 Mn1 N3 85.41(15) . . ?
N2 Mn1 N3 84.72(16) . . ?
O3 Mn1 Gd1 46.33(8) . . ?
O2 Mn1 Gd1 46.04(8) . . ?
O1 Mn1 Gd1 46.46(8) . . ?
N1 Mn1 Gd1 128.57(11) . . ?
N2 Mn1 Gd1 128.22(11) . . ?
N3 Mn1 Gd1 128.69(11) . . ?
O6 Mn2 O5 76.74(11) . . ?
O6 Mn2 O4 78.29(11) . . ?
O5 Mn2 O4 76.98(11) . . ?
O6 Mn2 N6 147.15(14) . . ?
O5 Mn2 N6 125.10(14) . . ?
O4 Mn2 N6 83.28(12) . . ?
O6 Mn2 N5 123.27(13) . . ?
O5 Mn2 N5 83.71(13) . . ?
O4 Mn2 N5 146.80(14) . . ?
N6 Mn2 N5 86.18(14) . . ?
O6 Mn2 N4 84.23(13) . . ?
O5 Mn2 N4 148.16(14) . . ?
O4 Mn2 N4 124.01(15) . . ?
N6 Mn2 N4 83.89(15) . . ?
N5 Mn2 N4 85.78(16) . . ?
O6 Mn2 Gd1 46.76(8) . . ?
O5 Mn2 Gd1 45.88(8) . . ?
O4 Mn2 Gd1 45.89(7) . . ?
N6 Mn2 Gd1 128.03(10) . . ?
N5 Mn2 Gd1 128.37(11) . . ?
N4 Mn2 Gd1 129.19(11) . . ?
O4 Gd1 O5 67.95(10) . . ?
O4 Gd1 O2 113.25(10) . . ?
O5 Gd1 O2 177.92(10) . . ?
O4 Gd1 O3 175.69(11) . . ?
O5 Gd1 O3 112.36(10) . . ?
O2 Gd1 O3 66.58(10) . . ?
O4 Gd1 O1 107.83(10) . . ?
O5 Gd1 O1 113.23(10) . . ?
O2 Gd1 O1 68.21(10) . . ?
O3 Gd1 O1 67.98(10) . . ?
O4 Gd1 O6 68.46(10) . . ?
O5 Gd1 O6 66.83(10) . . ?
O2 Gd1 O6 111.84(10) . . ?
O3 Gd1 O6 115.75(10) . . ?
O1 Gd1 O6 176.12(10) . . ?
O4 Gd1 O10 125.07(9) . . ?
O5 Gd1 O10 65.21(10) . . ?
O2 Gd1 O10 112.90(10) . . ?
O3 Gd1 O10 57.66(9) . . ?
O1 Gd1 O10 115.78(9) . . ?
O6 Gd1 O10 67.93(9) . . ?
O4 Gd1 O8 116.07(10) . . ?
O5 Gd1 O8 112.62(9) . . ?
O2 Gd1 O8 65.38(9) . . ?
O3 Gd1 O8 67.98(10) . . ?
O1 Gd1 O8 125.19(9) . . ?
O6 Gd1 O8 57.11(9) . . ?
O10 Gd1 O8 61.44(9) . . ?
O4 Gd1 O9 113.03(10) . . ?
O5 Gd1 O9 57.85(9) . . ?
O2 Gd1 O9 122.32(9) . . ?
O3 Gd1 O9 64.72(10) . . ?
O1 Gd1 O9 66.30(9) . . ?
O6 Gd1 O9 115.88(9) . . ?
O10 Gd1 O9 61.49(9) . . ?
O8 Gd1 O9 118.97(9) . . ?
O4 Gd1 O7 66.54(10) . . ?
O5 Gd1 O7 122.42(9) . . ?
O2 Gd1 O7 57.44(9) . . ?
O3 Gd1 O7 115.64(10) . . ?
O1 Gd1 O7 112.87(9) . . ?
O6 Gd1 O7 64.91(9) . . ?
O10 Gd1 O7 119.51(9) . . ?
O8 Gd1 O7 61.94(9) . . ?
O9 Gd1 O7 178.99(10) . . ?
O4 Gd1 Mn1 137.63(7) . . ?
O5 Gd1 Mn1 140.46(7) . . ?
O2 Gd1 Mn1 39.75(7) . . ?
O3 Gd1 Mn1 39.54(7) . . ?
O1 Gd1 Mn1 40.58(7) . . ?
O6 Gd1 Mn1 141.70(7) . . ?
O10 Gd1 Mn1 97.20(6) . . ?
O8 Gd1 Mn1 84.64(6) . . ?
O9 Gd1 Mn1 82.61(6) . . ?
O7 Gd1 Mn1 97.11(6) . . ?
O4 Gd1 Mn2 40.36(7) . . ?
O5 Gd1 Mn2 39.92(7) . . ?
O2 Gd1 Mn2 139.98(7) . . ?
O3 Gd1 Mn2 142.40(7) . . ?
O1 Gd1 Mn2 137.71(7) . . ?
O6 Gd1 Mn2 39.90(7) . . ?
O10 Gd1 Mn2 84.77(6) . . ?
O8 Gd1 Mn2 97.01(6) . . ?
O9 Gd1 Mn2 97.70(6) . . ?
O7 Gd1 Mn2 82.54(6) . . ?
Mn1 Gd1 Mn2 177.886(19) . . ?
C32 C51 C50 119.3(5) . . ?
N5 C52 C27 114.5(4) . . ?
N3 C42 C10 113.5(4) . . ?
C49 C48 C47 119.4(5) . . ?
O22 N20 O21 113.6(7) . . ?
O22 N20 O20 124.4(6) . . ?
O21 N20 O20 121.5(7) . . ?
#=================================================================END

data_6
#----------------------------------------------------------------------------#
#                   CHEMICAL INFORMATION                                     #
#----------------------------------------------------------------------------#
 
_chemical_name_systematic
;
 ?
;
_chemical_formula_moiety                'C58 H60 Mn2 N6 O12 Tb, N O3' 
_chemical_formula_sum                   'C58 H60 Mn2 N7 O15 Tb'
_chemical_formula_weight                1363.93
_chemical_compound_source               'synthesis as described'
_chemical_absolute_configuration        ad
 
#----------------------------------------------------------------------------#
#                   UNIT CELL INFORMATION                                    #
#----------------------------------------------------------------------------#
 
_symmetry_cell_setting                  orthorhombic
_symmetry_space_group_name_H-M          'P 21 21 21'
_symmetry_space_group_name_Hall         'P 2ac 2ab'
_symmetry_Int_Tables_number             19
loop_
    _symmetry_equiv_pos_as_xyz
'x, y, z'
'-x+1/2, -y, z+1/2'
'x+1/2, -y+1/2, -z'
'-x, y+1/2, -z+1/2'
 
_cell_length_a                          15.6736(10)
_cell_length_b                          24.5055(19)
_cell_length_c                          15.9210(11)
_cell_angle_alpha                       90
_cell_angle_beta                        90
_cell_angle_gamma                       90
_cell_volume                            6115.1(7)
_cell_formula_units_Z                   4
_cell_measurement_temperature           150
_cell_measurement_reflns_used           8000
_cell_measurement_theta_min             1.65
_cell_measurement_theta_max             26.05
_cell_measurement_wavelength            0.71073
 
#----------------------------------------------------------------------------#
#                   CRYSTAL INFORMATION                                      #
#----------------------------------------------------------------------------#
 
_exptl_crystal_description              parallelepiped
_exptl_crystal_colour                   yellow
_exptl_crystal_size_max                 0.35
_exptl_crystal_size_mid                 0.2
_exptl_crystal_size_min                 0.12
_exptl_crystal_density_diffrn           1.481
_exptl_crystal_density_method           'not measured'
_exptl_crystal_F_000                    2768
_exptl_special_details
;
 ?
;
 
#----------------------------------------------------------------------------#
#                   ABSORPTION CORRECTION                                    #
#----------------------------------------------------------------------------#
 
_exptl_absorpt_coefficient_mu           1.62
_exptl_absorpt_correction_type          refdelf
_exptl_absorpt_process_details
;
        (See: Walker, N. & Stuart, D. (1983) Acta Cryst. A39, 158-166)
;
_exptl_absorpt_correction_T_min         0.584
_exptl_absorpt_correction_T_max         0.815

 
#----------------------------------------------------------------------------#
#                   DATA COLLECTION                                          #
#----------------------------------------------------------------------------#
 
_diffrn_ambient_temperature             150
_diffrn_radiation_wavelength      0.71073
_diffrn_radiation_type            MoK\a
_diffrn_radiation_source          'fine-focus sealed tube'
_diffrn_radiation_monochromator   graphite
_diffrn_measurement_device        'Stoe IPDS' 
_diffrn_measurement_method        \f 
_diffrn_standards_number          200 
_diffrn_standards_interval_count  ? 
_diffrn_standards_interval_time   4 
_diffrn_standards_decay_%         0.1
_diffrn_reflns_av_R_equivalents         0.0609
_diffrn_reflns_av_unetI/netI            0.0402
_diffrn_reflns_number                   48777
_diffrn_reflns_limit_h_min              -19
_diffrn_reflns_limit_h_max              19
_diffrn_reflns_limit_k_min              -30
_diffrn_reflns_limit_k_max              30
_diffrn_reflns_limit_l_min              -19
_diffrn_reflns_limit_l_max              19
_diffrn_reflns_theta_min                2.47
_diffrn_reflns_theta_max                26.02
_diffrn_reflns_theta_full               26.02
_diffrn_measured_fraction_theta_full
                                        0.994
_diffrn_measured_fraction_theta_max
                                        0.994
_reflns_number_total                    11964
_reflns_number_gt                       10610
_reflns_threshold_expression           >2\s(I)
                   
#----------------------------------------------------------------------------#
#                   COMPUTER PROGRAMS USED                                   #
#----------------------------------------------------------------------------#
 
_computing_data_collection              'Stoe IPDS software (Stoe, 1996)'
_computing_cell_refinement              'Stoe IPDS software (Stoe, 1996)'
_computing_data_reduction               'XRED (Stoe, 1.08, 1996)'
_computing_structure_solution           'SIR92 (Giacovazzo et al, 1993)'
_computing_structure_refinement         'SHELXL-97 (Sheldrick, 1997)'
_computing_molecular_graphics           'Ortep-3 for Windows (Farrugia, 1997)'
_computing_publication_material
                                   'WinGX publication routines (Farrugia, 1999)'
 
#----------------------------------------------------------------------------#
#                   REFINEMENT INFORMATION                                   #
#----------------------------------------------------------------------------#
 
_refine_special_details
;
 Refinement of F^2^ against ALL reflections.  The weighted R-factor wR and
 goodness of fit S are based on F^2^, conventional R-factors R are based
 on F, with F set to zero for negative F^2^. The threshold expression of
 F^2^ > 2sigma(F^2^) is used only for calculating R-factors(gt) etc. and is
 not relevant to the choice of reflections for refinement.  R-factors based
 on F^2^ are statistically about twice as large as those based on F, and R-
 factors based on ALL data will be even larger.
;
_refine_ls_structure_factor_coef        Fsqd
_refine_ls_matrix_type                  full
_refine_ls_weighting_scheme             calc
_refine_ls_weighting_details
        'calc w=1/[\s^2^(Fo^2^)+(0.0601P)^2^+11.5752P] where P=(Fo^2^+2Fc^2^)/3'
_atom_sites_solution_primary            direct
_atom_sites_solution_secondary          difmap
_atom_sites_solution_hydrogens          geom
_refine_ls_hydrogen_treatment           constr
_refine_ls_extinction_method            none
_refine_ls_number_reflns                11964
_refine_ls_number_parameters            756
_refine_ls_number_restraints            0
_refine_ls_R_factor_all                 0.0509
_refine_ls_R_factor_gt                  0.0444
_refine_ls_wR_factor_ref                0.1142
_refine_ls_wR_factor_gt                 0.1084
_refine_ls_goodness_of_fit_ref          1.089
_refine_ls_restrained_S_all             1.089
_refine_ls_shift/su_max                 0.001
_refine_ls_shift/su_mean                0
_refine_ls_abs_structure_details
                                    'Flack H D (1983), Acta Cryst. A39, 876-881'
_refine_ls_abs_structure_Flack          0.028(9)
_refine_diff_density_max                1.189
_refine_diff_density_min                -0.805
_refine_diff_density_rms                0.109
 
#----------------------------------------------------------------------------#
#                   ATOMIC TYPES, COORDINATES AND THERMAL PARAMETERS         #
#----------------------------------------------------------------------------#
 
loop_
    _atom_type_symbol
    _atom_type_description
    _atom_type_scat_dispersion_real
    _atom_type_scat_dispersion_imag
    _atom_type_scat_source
C C 0.0033 0.0016 'International Tables Vol C Tables 4.2.6.8 and 6.1.1.4'
H H 0 0 'International Tables Vol C Tables 4.2.6.8 and 6.1.1.4'
N N 0.0061 0.0033 'International Tables Vol C Tables 4.2.6.8 and 6.1.1.4'
O O 0.0106 0.006 'International Tables Vol C Tables 4.2.6.8 and 6.1.1.4'
Mn Mn 0.3368 0.7283 'International Tables Vol C Tables 4.2.6.8 and 6.1.1.4'
Tb Tb -0.1723 4.1537 'International Tables Vol C Tables 4.2.6.8 and 6.1.1.4'
 
loop_
    _atom_site_label
    _atom_site_type_symbol
    _atom_site_fract_x
    _atom_site_fract_y
    _atom_site_fract_z
    _atom_site_U_iso_or_equiv
    _atom_site_adp_type
    _atom_site_occupancy
    _atom_site_symmetry_multiplicity
    _atom_site_calc_flag
    _atom_site_refinement_flags
    _atom_site_disorder_assembly
    _atom_site_disorder_group
C1 C -0.0119(4) 0.7415(3) 0.7515(4) 0.0358(14) Uani 1 1 d . . .
H1A H -0.0685 0.726 0.7462 0.043 Uiso 1 1 calc R . .
H1B H -0.0113 0.7758 0.7209 0.043 Uiso 1 1 calc R . .
C2 C 0.0279(4) 0.7000(3) 0.8929(4) 0.0397(15) Uani 1 1 d . . .
H2A H 0.0147 0.7053 0.9519 0.048 Uiso 1 1 calc R . .
H2B H -0.0083 0.6709 0.8722 0.048 Uiso 1 1 calc R . .
C3 C 0.0736(4) 0.7972(3) 0.8570(4) 0.0413(15) Uani 1 1 d . . .
H3A H 0.0481 0.8324 0.8449 0.05 Uiso 1 1 calc R . .
H3B H 0.0916 0.7974 0.9152 0.05 Uiso 1 1 calc R . .
C4 C 0.0066(4) 0.7529(3) 0.8448(4) 0.0347(14) Uani 1 1 d . . .
C5 C -0.0761(4) 0.7756(3) 0.8833(5) 0.0424(15) Uani 1 1 d . . .
H5A H -0.0643 0.79 0.9382 0.064 Uiso 1 1 calc R . .
H5B H -0.1175 0.7469 0.8877 0.064 Uiso 1 1 calc R . .
H5C H -0.098 0.8042 0.8481 0.064 Uiso 1 1 calc R . .
C6 C 0.6459(5) 0.5436(3) 0.4675(4) 0.0393(14) Uani 1 1 d . . .
H6A H 0.6726 0.5532 0.4145 0.047 Uiso 1 1 calc R . .
H6B H 0.6287 0.5056 0.464 0.047 Uiso 1 1 calc R . .
C7 C 0.6857(4) 0.5161(2) 0.6168(4) 0.0330(13) Uani 1 1 d . . .
H7A H 0.697 0.4778 0.6064 0.04 Uiso 1 1 calc R . .
H7B H 0.7212 0.5275 0.6636 0.04 Uiso 1 1 calc R . .
C8 C 0.7307(4) 0.6088(3) 0.5570(4) 0.0372(14) Uani 1 1 d . . .
H8A H 0.7869 0.611 0.5821 0.045 Uiso 1 1 calc R . .
H8B H 0.732 0.6293 0.5049 0.045 Uiso 1 1 calc R . .
C9 C 0.7111(4) 0.5497(3) 0.5373(4) 0.0309(13) Uani 1 1 d . . .
C10 C 0.7948(4) 0.5235(3) 0.5045(5) 0.0434(16) Uani 1 1 d . . .
H10A H 0.8202 0.547 0.4633 0.065 Uiso 1 1 calc R . .
H10B H 0.7823 0.4887 0.4796 0.065 Uiso 1 1 calc R . .
H10C H 0.8337 0.5186 0.5505 0.065 Uiso 1 1 calc R . .
C11 C 0.0200(4) 0.6694(2) 0.6600(4) 0.0305(13) Uani 1 1 d . . .
H11 H -0.0388 0.6696 0.6526 0.037 Uiso 1 1 calc R . .
C12 C 0.0687(4) 0.6299(2) 0.6104(4) 0.0261(11) Uani 1 1 d . . .
C13 C 0.0201(4) 0.5998(2) 0.5526(4) 0.0305(12) Uani 1 1 d . . .
H13 H -0.0389 0.604 0.5517 0.037 Uiso 1 1 calc R . .
C14 C 0.0582(4) 0.5640(2) 0.4971(4) 0.0327(13) Uani 1 1 d . . .
H14 H 0.0259 0.5456 0.4572 0.039 Uiso 1 1 calc R . .
C15 C 0.1461(4) 0.5562(2) 0.5021(3) 0.0298(12) Uani 1 1 d . . .
H15 H 0.1723 0.5318 0.4655 0.036 Uiso 1 1 calc R . .
C16 C 0.1944(4) 0.5834(2) 0.5591(4) 0.0290(12) Uani 1 1 d . . .
C17 C 0.3193(4) 0.5362(2) 0.5171(4) 0.0324(13) Uani 1 1 d . . .
H17A H 0.2941 0.5014 0.5292 0.049 Uiso 1 1 calc R . .
H17B H 0.3793 0.535 0.5291 0.049 Uiso 1 1 calc R . .
H17C H 0.3109 0.5448 0.4588 0.049 Uiso 1 1 calc R . .
C18 C 0.1517(4) 0.6610(2) 0.9499(3) 0.0302(12) Uani 1 1 d . . .
H18 H 0.1178 0.659 0.9978 0.036 Uiso 1 1 calc R . .
C19 C 0.2376(4) 0.6385(2) 0.9574(4) 0.0309(13) Uani 1 1 d . . .
C20 C 0.2560(4) 0.6134(2) 1.0354(4) 0.0318(13) Uani 1 1 d . . .
H20 H 0.2149 0.6137 1.0774 0.038 Uiso 1 1 calc R . .
C21 C 0.3311(4) 0.5891(3) 1.0503(4) 0.0383(14) Uani 1 1 d . . .
H21 H 0.3414 0.5727 1.102 0.046 Uiso 1 1 calc R . .
C22 C 0.3939(4) 0.5885(2) 0.9877(4) 0.0310(12) Uani 1 1 d . . .
H22 H 0.4466 0.5724 0.998 0.037 Uiso 1 1 calc R . .
C23 C 0.3771(3) 0.6120(2) 0.9109(4) 0.0276(12) Uani 1 1 d . . .
C24 C 0.2990(3) 0.6381(2) 0.8931(3) 0.0232(11) Uani 1 1 d . . .
C25 C 0.5125(4) 0.5853(3) 0.8560(4) 0.0383(15) Uani 1 1 d . . .
H25A H 0.5437 0.6025 0.9007 0.057 Uiso 1 1 calc R . .
H25B H 0.5449 0.5877 0.8049 0.057 Uiso 1 1 calc R . .
H25C H 0.5028 0.5477 0.8696 0.057 Uiso 1 1 calc R . .
C26 C 0.1852(4) 0.8333(2) 0.7739(4) 0.0333(13) Uani 1 1 d . . .
H26 H 0.1581 0.8661 0.7861 0.04 Uiso 1 1 calc R . .
C27 C 0.2630(4) 0.8366(2) 0.7249(4) 0.0320(13) Uani 1 1 d . . .
C028 C 0.1589(4) 0.6210(2) 0.6148(3) 0.0265(12) Uani 1 1 d . . .
C28 C 0.2964(4) 0.8906(2) 0.7122(4) 0.0357(14) Uani 1 1 d . . .
H28 H 0.2658 0.9206 0.7318 0.043 Uiso 1 1 calc R . .
C29 C 0.3710(4) 0.8985(3) 0.6725(4) 0.0389(14) Uani 1 1 d . . .
H29 H 0.3916 0.9338 0.6655 0.047 Uiso 1 1 calc R . .
C30 C 0.4181(4) 0.8545(2) 0.6413(4) 0.0345(13) Uani 1 1 d . . .
H30 H 0.47 0.8604 0.6147 0.041 Uiso 1 1 calc R . .
C31 C 0.3871(4) 0.8023(3) 0.6503(4) 0.0321(13) Uani 1 1 d . . .
C32 C 0.3099(3) 0.7911(2) 0.6934(4) 0.0277(11) Uani 1 1 d . . .
C33 C 0.5020(4) 0.7641(3) 0.5758(4) 0.0367(14) Uani 1 1 d . . .
H33A H 0.4898 0.7856 0.5268 0.055 Uiso 1 1 calc R . .
H33B H 0.524 0.7292 0.559 0.055 Uiso 1 1 calc R . .
H33C H 0.5435 0.7826 0.6098 0.055 Uiso 1 1 calc R . .
C34 C 0.5283(4) 0.5921(2) 0.4111(4) 0.0313(13) Uani 1 1 d . . .
H34 H 0.5526 0.5815 0.3603 0.038 Uiso 1 1 calc R . .
C35 C 0.4489(4) 0.6232(2) 0.4066(4) 0.0291(12) Uani 1 1 d . . .
C36 C 0.4130(4) 0.6274(2) 0.3250(4) 0.0346(13) Uani 1 1 d . . .
H36 H 0.4415 0.612 0.2796 0.042 Uiso 1 1 calc R . .
C37 C 0.3378(4) 0.6535(3) 0.3122(4) 0.0380(13) Uani 1 1 d . . .
H37 H 0.3148 0.6547 0.2584 0.046 Uiso 1 1 calc R . .
C38 C 0.2942(4) 0.6787(2) 0.3788(4) 0.0306(12) Uani 1 1 d . . .
H38 H 0.2432 0.6971 0.3695 0.037 Uiso 1 1 calc R . .
C39 C 0.3290(4) 0.6754(2) 0.4587(4) 0.0285(12) Uani 1 1 d . . .
C40 C 0.4065(4) 0.6473(2) 0.4760(3) 0.0267(11) Uani 1 1 d . . .
C41 C 0.2176(4) 0.7305(3) 0.5162(4) 0.0360(14) Uani 1 1 d . . .
H41A H 0.2308 0.7606 0.48 0.054 Uiso 1 1 calc R . .
H41B H 0.198 0.744 0.5694 0.054 Uiso 1 1 calc R . .
H41C H 0.1737 0.7086 0.4909 0.054 Uiso 1 1 calc R . .
C42 C 0.5559(4) 0.4787(3) 0.6603(4) 0.0354(14) Uani 1 1 d . . .
H42 H 0.5856 0.446 0.6549 0.042 Uiso 1 1 calc R . .
C43 C 0.4691(4) 0.4750(2) 0.6904(4) 0.0319(12) Uani 1 1 d . . .
C44 C 0.4427(4) 0.4218(2) 0.7128(4) 0.0330(13) Uani 1 1 d . . .
H44 H 0.4796 0.3927 0.7035 0.04 Uiso 1 1 calc R . .
C45 C 0.3639(4) 0.4118(2) 0.7480(4) 0.0339(13) Uani 1 1 d . . .
H45 H 0.3479 0.3765 0.7622 0.041 Uiso 1 1 calc R . .
C46 C 0.3079(4) 0.4558(2) 0.7623(4) 0.0325(13) Uani 1 1 d . . .
H46 H 0.255 0.4499 0.7872 0.039 Uiso 1 1 calc R . .
C47 C 0.3322(4) 0.5074(2) 0.7389(4) 0.0299(12) Uani 1 1 d . . .
C48 C 0.4131(4) 0.5194(2) 0.7021(3) 0.0249(11) Uani 1 1 d . . .
C49 C 0.1984(4) 0.5448(3) 0.7848(4) 0.0341(14) Uani 1 1 d . . .
H49A H 0.1659 0.5211 0.7488 0.051 Uiso 1 1 calc R . .
H49B H 0.1702 0.5794 0.7891 0.051 Uiso 1 1 calc R . .
H49C H 0.203 0.5287 0.8396 0.051 Uiso 1 1 calc R . .
C50 C 0.6974(3) 0.6665(2) 0.6707(4) 0.0335(14) Uani 1 1 d . . .
H50 H 0.7565 0.6701 0.6724 0.04 Uiso 1 1 calc R . .
C51 C 0.6503(4) 0.6978(2) 0.7320(4) 0.0277(11) Uani 1 1 d . . .
C52 C 0.6992(4) 0.7319(3) 0.7839(4) 0.0361(14) Uani 1 1 d . . .
H52 H 0.7583 0.7315 0.7788 0.043 Uiso 1 1 calc R . .
C53 C 0.6618(4) 0.7659(3) 0.8420(4) 0.0418(16) Uani 1 1 d . . .
H53 H 0.6954 0.7881 0.8758 0.05 Uiso 1 1 calc R . .
C54 C 0.5735(4) 0.7666(3) 0.8498(4) 0.0366(14) Uani 1 1 d . . .
H54 H 0.5478 0.7902 0.8879 0.044 Uiso 1 1 calc R . .
C55 C 0.5238(4) 0.7324(2) 0.8011(4) 0.0297(12) Uani 1 1 d . . .
C56 C 0.5585(4) 0.6973(2) 0.7421(3) 0.0259(12) Uani 1 1 d . . .
C57 C 0.3963(4) 0.7630(3) 0.8676(4) 0.0333(13) Uani 1 1 d . . .
H57A H 0.418 0.7535 0.9221 0.05 Uiso 1 1 calc R . .
H57B H 0.3359 0.7566 0.8661 0.05 Uiso 1 1 calc R . .
H57C H 0.4074 0.8009 0.8568 0.05 Uiso 1 1 calc R . .
N1 N 0.0508(3) 0.7038(2) 0.7129(3) 0.0297(11) Uani 1 1 d . . .
N2 N 0.1173(3) 0.6832(2) 0.8852(3) 0.0318(11) Uani 1 1 d . . .
N3 N 0.1500(3) 0.78968(18) 0.8022(3) 0.0344(11) Uani 1 1 d . . .
N4 N 0.5682(3) 0.5780(2) 0.4790(3) 0.0301(11) Uani 1 1 d . . .
N5 N 0.5964(3) 0.5225(2) 0.6401(3) 0.0282(10) Uani 1 1 d . . .
N6 N 0.6681(3) 0.6344(2) 0.6144(3) 0.0314(11) Uani 1 1 d . . .
N7 N 0.8510(5) 0.5892(3) 0.7776(4) 0.0554(16) Uani 1 1 d . . .
O1 O 0.2086(2) 0.64756(15) 0.6689(2) 0.0247(8) Uani 1 1 d . . .
O2 O 0.2869(2) 0.65978(16) 0.8174(2) 0.0286(8) Uani 1 1 d . . .
O3 O 0.2863(2) 0.73983(14) 0.7035(2) 0.0251(8) Uani 1 1 d . . .
O4 O 0.4317(2) 0.64365(15) 0.5546(2) 0.0255(8) Uani 1 1 d . . .
O5 O 0.4296(2) 0.56973(14) 0.6791(3) 0.0264(8) Uani 1 1 d . . .
O6 O 0.5089(2) 0.66486(15) 0.6977(2) 0.0254(8) Uani 1 1 d . . .
O7 O 0.2799(3) 0.57722(16) 0.5679(3) 0.0295(9) Uani 1 1 d . . .
O8 O 0.4332(3) 0.61213(17) 0.8452(3) 0.0319(9) Uani 1 1 d . . .
O9 O 0.4272(3) 0.75665(17) 0.6221(3) 0.0336(9) Uani 1 1 d . . .
O10 O 0.2927(3) 0.69783(17) 0.5284(3) 0.0336(9) Uani 1 1 d . . .
O11 O 0.2819(3) 0.55237(16) 0.7502(3) 0.0332(9) Uani 1 1 d . . .
O12 O 0.4370(2) 0.73062(16) 0.8055(3) 0.0319(9) Uani 1 1 d . . .
O13 O 0.8508(4) 0.6360(2) 0.8054(4) 0.0633(14) Uani 1 1 d . . .
O14 O 0.8221(7) 0.5514(3) 0.8189(5) 0.116(3) Uani 1 1 d . . .
O15 O 0.8723(4) 0.5788(3) 0.7055(4) 0.0687(16) Uani 1 1 d . . .
Mn1 Mn 0.17961(5) 0.70476(3) 0.76654(5) 0.02501(18) Uani 1 1 d . . .
Mn2 Mn 0.53751(5) 0.60119(3) 0.60922(5) 0.02479(18) Uani 1 1 d . . .
Tb1 Tb 0.358856(17) 0.655129(11) 0.685430(17) 0.02704(8) Uani 1 1 d . . .
 
loop_
    _atom_site_aniso_label
    _atom_site_aniso_U_11
    _atom_site_aniso_U_22
    _atom_site_aniso_U_33
    _atom_site_aniso_U_23
    _atom_site_aniso_U_13
    _atom_site_aniso_U_12
C1 0.028(3) 0.046(4) 0.033(3) -0.001(3) -0.006(3) 0.012(3)
C2 0.030(3) 0.056(4) 0.034(3) 0.011(3) 0.006(3) 0.008(3)
C3 0.037(3) 0.045(4) 0.042(3) -0.015(3) 0.011(3) 0.008(3)
C4 0.022(3) 0.043(3) 0.040(3) -0.009(3) 0.005(3) 0.007(2)
C5 0.029(3) 0.055(4) 0.044(4) -0.003(3) 0.001(3) 0.006(3)
C6 0.042(4) 0.039(3) 0.036(3) -0.006(3) 0.023(3) 0.011(3)
C7 0.028(3) 0.031(3) 0.041(3) 0.005(3) -0.002(3) 0.011(2)
C8 0.025(3) 0.048(4) 0.039(3) 0.000(3) 0.014(3) 0.000(3)
C9 0.020(3) 0.039(3) 0.034(3) 0.002(3) 0.012(2) 0.008(2)
C10 0.032(3) 0.045(4) 0.054(4) 0.002(3) 0.008(3) 0.004(3)
C11 0.025(3) 0.036(3) 0.030(3) 0.002(2) -0.007(2) 0.001(2)
C12 0.028(3) 0.023(3) 0.028(3) 0.001(2) 0.004(2) 0.003(2)
C13 0.026(3) 0.026(3) 0.039(3) 0.004(2) -0.001(3) -0.001(2)
C14 0.037(3) 0.030(3) 0.031(3) -0.009(2) -0.011(3) -0.001(2)
C15 0.033(3) 0.029(3) 0.028(3) -0.003(2) 0.003(3) 0.000(3)
C16 0.024(3) 0.028(3) 0.035(3) 0.004(2) 0.006(3) 0.000(2)
C17 0.037(3) 0.024(3) 0.036(3) -0.004(2) 0.003(3) -0.003(2)
C18 0.030(3) 0.037(3) 0.024(2) 0.003(2) 0.009(2) 0.002(3)
C19 0.031(3) 0.033(3) 0.029(3) -0.010(2) -0.001(3) 0.001(2)
C20 0.034(3) 0.030(3) 0.030(3) -0.004(2) 0.001(3) -0.002(2)
C21 0.050(4) 0.034(3) 0.031(3) -0.002(3) -0.003(3) 0.004(3)
C22 0.038(3) 0.028(3) 0.027(3) 0.002(2) -0.003(3) 0.008(2)
C23 0.024(3) 0.022(3) 0.036(3) -0.003(2) 0.004(2) -0.004(2)
C24 0.029(3) 0.020(2) 0.020(2) -0.003(2) -0.002(2) 0.006(2)
C25 0.032(3) 0.048(4) 0.034(3) 0.006(3) -0.004(3) 0.005(3)
C26 0.041(3) 0.022(3) 0.037(3) -0.003(2) -0.001(3) 0.007(2)
C27 0.042(3) 0.027(3) 0.028(3) -0.001(2) -0.006(3) 0.005(2)
C028 0.034(3) 0.027(3) 0.018(2) 0.004(2) -0.002(2) -0.012(2)
C28 0.054(4) 0.023(3) 0.030(3) -0.003(2) -0.010(3) 0.002(3)
C29 0.047(4) 0.034(3) 0.036(3) 0.004(3) -0.008(3) -0.006(3)
C30 0.040(3) 0.029(3) 0.035(3) 0.004(2) 0.002(3) -0.008(3)
C31 0.031(3) 0.039(3) 0.026(3) -0.004(2) -0.006(2) 0.004(2)
C32 0.030(3) 0.024(2) 0.029(3) 0.003(2) -0.004(3) 0.000(2)
C33 0.035(3) 0.036(3) 0.039(3) 0.002(3) 0.005(3) 0.002(3)
C34 0.033(3) 0.034(3) 0.026(3) -0.004(2) 0.008(3) 0.000(2)
C35 0.028(3) 0.024(3) 0.036(3) 0.000(2) 0.002(3) -0.003(2)
C36 0.036(3) 0.032(3) 0.036(3) -0.003(3) 0.003(3) -0.005(2)
C37 0.043(3) 0.046(3) 0.025(3) 0.001(3) -0.007(3) -0.010(3)
C38 0.030(3) 0.034(3) 0.027(3) 0.004(2) 0.004(2) -0.002(2)
C39 0.027(3) 0.021(2) 0.038(3) -0.001(2) -0.002(2) -0.003(2)
C40 0.029(3) 0.029(3) 0.022(2) 0.001(2) -0.004(2) 0.001(2)
C41 0.037(3) 0.033(3) 0.038(3) 0.004(3) -0.001(3) 0.009(3)
C42 0.035(3) 0.031(3) 0.040(3) 0.001(2) 0.001(3) 0.009(2)
C43 0.030(3) 0.038(3) 0.028(3) 0.006(3) 0.000(3) -0.002(2)
C44 0.032(3) 0.030(3) 0.037(3) 0.005(2) -0.002(3) 0.007(2)
C45 0.035(3) 0.029(3) 0.037(3) 0.005(2) 0.001(3) -0.001(3)
C46 0.033(3) 0.034(3) 0.030(3) 0.006(2) 0.003(3) -0.002(2)
C47 0.025(3) 0.037(3) 0.028(3) 0.002(2) 0.002(2) -0.002(2)
C48 0.028(3) 0.021(2) 0.025(3) 0.003(2) 0.001(2) 0.001(2)
C49 0.025(3) 0.037(3) 0.040(3) 0.008(3) 0.004(3) -0.006(2)
C50 0.013(2) 0.040(3) 0.047(4) 0.006(3) 0.000(3) -0.006(2)
C51 0.026(3) 0.023(2) 0.034(3) 0.001(2) 0.005(3) -0.002(2)
C52 0.023(3) 0.040(3) 0.046(4) 0.000(3) -0.004(3) -0.002(2)
C53 0.034(4) 0.045(4) 0.047(4) -0.014(3) -0.016(3) -0.003(3)
C54 0.034(3) 0.031(3) 0.044(3) -0.007(3) 0.001(3) -0.003(3)
C55 0.028(3) 0.033(3) 0.029(3) 0.006(2) -0.001(3) 0.004(2)
C56 0.032(3) 0.027(3) 0.019(2) 0.004(2) -0.005(2) -0.008(2)
C57 0.034(3) 0.037(3) 0.028(3) -0.006(2) -0.003(3) 0.005(3)
N1 0.027(2) 0.035(3) 0.027(2) -0.001(2) -0.004(2) 0.009(2)
N2 0.029(3) 0.037(3) 0.030(3) -0.002(2) 0.002(2) 0.001(2)
N3 0.038(3) 0.026(2) 0.040(3) -0.011(2) 0.003(3) 0.007(2)
N4 0.031(3) 0.036(3) 0.023(2) -0.002(2) 0.002(2) 0.006(2)
N5 0.022(2) 0.031(3) 0.031(3) 0.006(2) 0.003(2) 0.0047(19)
N6 0.024(2) 0.036(3) 0.034(3) 0.002(2) 0.005(2) -0.0044(19)
N7 0.061(4) 0.047(4) 0.058(4) 0.010(3) -0.009(4) 0.006(3)
O1 0.0211(17) 0.0279(19) 0.0250(19) -0.0036(15) -0.0033(15) -0.0023(15)
O2 0.0263(18) 0.0342(19) 0.0253(17) 0.003(2) 0.0024(17) 0.0064(16)
O3 0.0256(18) 0.0170(17) 0.033(2) -0.0034(15) 0.0034(16) 0.0041(14)
O4 0.0271(19) 0.028(2) 0.0213(17) -0.0001(15) 0.0018(16) 0.0071(15)
O5 0.0260(18) 0.0217(17) 0.032(2) 0.0036(17) 0.0078(19) 0.0035(14)
O6 0.0208(17) 0.0299(19) 0.0254(19) -0.0038(16) 0.0014(15) 0.0002(14)
O7 0.026(2) 0.031(2) 0.031(2) -0.0046(17) 0.0048(18) 0.0011(17)
O8 0.024(2) 0.038(2) 0.033(2) 0.0061(17) 0.0007(17) 0.0055(17)
O9 0.034(2) 0.036(2) 0.032(2) -0.0024(17) 0.0053(19) -0.0008(18)
O10 0.034(2) 0.034(2) 0.033(2) -0.0023(18) 0.0051(18) 0.0082(18)
O11 0.030(2) 0.026(2) 0.043(3) 0.0028(18) 0.0066(19) 0.0013(17)
O12 0.0257(19) 0.035(2) 0.035(2) -0.0034(19) -0.0003(19) 0.0024(16)
O13 0.070(4) 0.053(3) 0.067(3) -0.012(3) -0.008(4) 0.012(3)
O14 0.190(9) 0.076(5) 0.082(5) 0.037(4) -0.004(6) -0.027(5)
O15 0.067(4) 0.082(4) 0.057(4) -0.024(3) 0.006(3) 0.000(3)
Mn1 0.0227(4) 0.0286(4) 0.0237(4) -0.0027(3) 0.0018(3) 0.0039(3)
Mn2 0.0226(4) 0.0263(4) 0.0255(4) 0.0002(3) 0.0029(3) 0.0026(3)
Tb1 0.02358(12) 0.03009(13) 0.02744(12) -0.00163(11) 0.00249(11) 0.00270(11)
 
 
#----------------------------------------------------------------------------#
#                   MOLECULAR GEOMETRY                                       #
#----------------------------------------------------------------------------#
 
_geom_special_details
;
 All esds (except the esd in the dihedral angle between two l.s. planes)
 are estimated using the full covariance matrix.  The cell esds are taken
 into account individually in the estimation of esds in distances, angles
 and torsion angles; correlations between esds in cell parameters are only
 used when they are defined by crystal symmetry.  An approximate (isotropic)
 treatment of cell esds is used for estimating esds involving l.s. planes.
;
loop_
    _geom_bond_atom_site_label_1
    _geom_bond_atom_site_label_2
    _geom_bond_distance
    _geom_bond_site_symmetry_2
    _geom_bond_publ_flag
C1 N1 1.481(8) . ?
C1 C4 1.539(9) . ?
C2 N2 1.466(8) . ?
C2 C4 1.541(9) . ?
C3 N3 1.492(8) . ?
C3 C4 1.524(9) . ?
C4 C5 1.538(8) . ?
C6 N4 1.493(8) . ?
C6 C9 1.517(10) . ?
C7 N5 1.456(7) . ?
C7 C9 1.562(9) . ?
C8 N6 1.480(8) . ?
C8 C9 1.515(9) . ?
C9 C10 1.551(8) . ?
C11 N1 1.286(8) . ?
C11 C12 1.464(8) . ?
C12 C13 1.404(8) . ?
C12 C028 1.433(8) . ?
C13 C14 1.381(9) . ?
C14 C15 1.393(9) . ?
C15 C16 1.357(9) . ?
C16 O7 1.357(7) . ?
C16 C028 1.393(8) . ?
C17 O7 1.430(7) . ?
C18 N2 1.284(8) . ?
C18 C19 1.461(8) . ?
C19 C24 1.405(8) . ?
C19 C20 1.416(9) . ?
C20 C21 1.339(9) . ?
C21 C22 1.401(9) . ?
C22 C23 1.377(8) . ?
C23 O8 1.366(7) . ?
C23 C24 1.411(7) . ?
C24 O2 1.330(7) . ?
C25 O8 1.417(7) . ?
C26 N3 1.286(8) . ?
C26 C27 1.449(9) . ?
C27 C32 1.428(8) . ?
C27 C28 1.437(9) . ?
C028 O1 1.331(6) . ?
C28 C29 1.343(9) . ?
C29 C30 1.398(9) . ?
C30 C31 1.375(9) . ?
C31 O9 1.360(7) . ?
C31 C32 1.417(9) . ?
C32 O3 1.319(6) . ?
C33 O9 1.395(8) . ?
C34 N4 1.297(8) . ?
C34 C35 1.460(8) . ?
C35 C40 1.418(8) . ?
C35 C36 1.419(9) . ?
C36 C37 1.357(9) . ?
C37 C38 1.404(9) . ?
C38 C39 1.387(8) . ?
C39 O10 1.364(7) . ?
C39 C40 1.424(8) . ?
C40 O4 1.315(6) . ?
C41 O10 1.437(7) . ?
C42 N5 1.289(8) . ?
C42 C43 1.446(9) . ?
C43 C48 1.411(8) . ?
C43 C44 1.413(8) . ?
C44 C45 1.377(9) . ?
C45 C46 1.409(9) . ?
C46 C47 1.372(9) . ?
C47 O11 1.367(7) . ?
C47 C48 1.428(8) . ?
C48 O5 1.311(6) . ?
C49 O11 1.432(7) . ?
C50 N6 1.277(8) . ?
C50 C51 1.446(8) . ?
C51 C52 1.402(8) . ?
C51 C56 1.447(8) . ?
C52 C53 1.375(9) . ?
C53 C54 1.390(10) . ?
C54 C55 1.382(9) . ?
C55 O12 1.364(7) . ?
C55 C56 1.385(8) . ?
C56 O6 1.319(7) . ?
C57 O12 1.419(7) . ?
N1 Mn1 2.192(5) . ?
N2 Mn1 2.191(5) . ?
N3 Mn1 2.207(4) . ?
N4 Mn2 2.202(5) . ?
N5 Mn2 2.193(5) . ?
N6 Mn2 2.204(5) . ?
N7 O15 1.223(9) . ?
N7 O14 1.224(9) . ?
N7 O13 1.230(8) . ?
O1 Mn1 2.142(4) . ?
O1 Tb1 2.377(3) . ?
O2 Mn1 2.168(4) . ?
O2 Tb1 2.388(4) . ?
O3 Mn1 2.130(4) . ?
O3 Tb1 2.385(3) . ?
O4 Mn2 2.143(4) . ?
O4 Tb1 2.392(4) . ?
O5 Mn2 2.166(4) . ?
O5 Tb1 2.371(3) . ?
O6 Mn2 2.149(4) . ?
O6 Tb1 2.371(3) . ?
O9 Tb1 2.891(4) . ?
O10 Tb1 2.901(4) . ?
Mn1 Tb1 3.3226(9) . ?
Mn2 Tb1 3.3257(9) . ?
 
loop_
    _geom_angle_atom_site_label_1
    _geom_angle_atom_site_label_2
    _geom_angle_atom_site_label_3
    _geom_angle
    _geom_angle_site_symmetry_1
    _geom_angle_site_symmetry_3
    _geom_angle_publ_flag
N1 C1 C4 112.9(5) . . ?
N2 C2 C4 113.7(5) . . ?
N3 C3 C4 113.0(5) . . ?
C3 C4 C5 105.7(5) . . ?
C3 C4 C1 112.4(6) . . ?
C5 C4 C1 107.0(5) . . ?
C3 C4 C2 112.7(6) . . ?
C5 C4 C2 106.8(5) . . ?
C1 C4 C2 111.6(6) . . ?
N4 C6 C9 113.8(5) . . ?
N5 C7 C9 113.2(5) . . ?
N6 C8 C9 113.5(5) . . ?
C8 C9 C6 112.5(5) . . ?
C8 C9 C10 107.1(5) . . ?
C6 C9 C10 106.5(5) . . ?
C8 C9 C7 112.8(5) . . ?
C6 C9 C7 111.8(5) . . ?
C10 C9 C7 105.7(5) . . ?
N1 C11 C12 126.3(5) . . ?
C13 C12 C028 119.2(5) . . ?
C13 C12 C11 114.8(5) . . ?
C028 C12 C11 126.1(5) . . ?
C14 C13 C12 121.2(5) . . ?
C13 C14 C15 118.6(5) . . ?
C16 C15 C14 121.4(5) . . ?
O7 C16 C15 124.4(5) . . ?
O7 C16 C028 113.8(5) . . ?
C15 C16 C028 121.9(5) . . ?
N2 C18 C19 127.7(5) . . ?
C24 C19 C20 119.8(5) . . ?
C24 C19 C18 125.1(5) . . ?
C20 C19 C18 115.0(5) . . ?
C21 C20 C19 121.9(6) . . ?
C20 C21 C22 119.7(6) . . ?
C23 C22 C21 119.6(6) . . ?
O8 C23 C22 123.9(5) . . ?
O8 C23 C24 113.8(5) . . ?
C22 C23 C24 122.3(5) . . ?
O2 C24 C19 124.0(5) . . ?
O2 C24 C23 119.2(5) . . ?
C19 C24 C23 116.8(5) . . ?
N3 C26 C27 126.6(5) . . ?
C32 C27 C28 118.9(6) . . ?
C32 C27 C26 125.4(5) . . ?
C28 C27 C26 115.7(5) . . ?
O1 C028 C16 120.1(5) . . ?
O1 C028 C12 122.3(5) . . ?
C16 C028 C12 117.6(5) . . ?
C29 C28 C27 121.1(6) . . ?
C28 C29 C30 121.0(6) . . ?
C31 C30 C29 119.6(6) . . ?
O9 C31 C30 124.5(6) . . ?
O9 C31 C32 113.3(5) . . ?
C30 C31 C32 122.1(6) . . ?
O3 C32 C31 118.9(5) . . ?
O3 C32 C27 123.8(5) . . ?
C31 C32 C27 117.3(5) . . ?
N4 C34 C35 126.2(5) . . ?
C40 C35 C36 119.8(5) . . ?
C40 C35 C34 125.3(5) . . ?
C36 C35 C34 114.9(5) . . ?
C37 C36 C35 121.1(6) . . ?
C36 C37 C38 121.1(6) . . ?
C39 C38 C37 118.4(6) . . ?
O10 C39 C38 124.0(5) . . ?
O10 C39 C40 113.2(5) . . ?
C38 C39 C40 122.8(5) . . ?
O4 C40 C35 125.0(5) . . ?
O4 C40 C39 118.2(5) . . ?
C35 C40 C39 116.8(5) . . ?
N5 C42 C43 126.9(5) . . ?
C48 C43 C44 119.8(5) . . ?
C48 C43 C42 125.4(5) . . ?
C44 C43 C42 114.7(5) . . ?
C45 C44 C43 121.9(5) . . ?
C44 C45 C46 119.3(5) . . ?
C47 C46 C45 119.2(6) . . ?
O11 C47 C46 123.1(5) . . ?
O11 C47 C48 113.6(5) . . ?
C46 C47 C48 123.3(5) . . ?
O5 C48 C43 124.5(5) . . ?
O5 C48 C47 118.9(5) . . ?
C43 C48 C47 116.5(5) . . ?
N6 C50 C51 128.1(5) . . ?
C52 C51 C50 115.8(5) . . ?
C52 C51 C56 118.9(5) . . ?
C50 C51 C56 125.3(5) . . ?
C53 C52 C51 121.6(6) . . ?
C52 C53 C54 119.5(6) . . ?
C55 C54 C53 120.2(6) . . ?
O12 C55 C54 123.6(6) . . ?
O12 C55 C56 114.0(5) . . ?
C54 C55 C56 122.4(6) . . ?
O6 C56 C55 120.5(5) . . ?
O6 C56 C51 122.2(5) . . ?
C55 C56 C51 117.4(5) . . ?
C11 N1 C1 115.6(5) . . ?
C11 N1 Mn1 127.4(4) . . ?
C1 N1 Mn1 116.3(4) . . ?
C18 N2 C2 116.9(5) . . ?
C18 N2 Mn1 127.4(4) . . ?
C2 N2 Mn1 115.5(4) . . ?
C26 N3 C3 116.5(5) . . ?
C26 N3 Mn1 127.2(4) . . ?
C3 N3 Mn1 115.8(4) . . ?
C34 N4 C6 116.2(5) . . ?
C34 N4 Mn2 127.7(4) . . ?
C6 N4 Mn2 116.1(4) . . ?
C42 N5 C7 116.5(5) . . ?
C42 N5 Mn2 125.5(4) . . ?
C7 N5 Mn2 116.3(4) . . ?
C50 N6 C8 117.1(5) . . ?
C50 N6 Mn2 126.0(4) . . ?
C8 N6 Mn2 115.8(4) . . ?
O15 N7 O14 116.6(8) . . ?
O15 N7 O13 122.3(7) . . ?
O14 N7 O13 120.7(8) . . ?
C028 O1 Mn1 131.7(3) . . ?
C028 O1 Tb1 133.6(3) . . ?
Mn1 O1 Tb1 94.51(13) . . ?
C24 O2 Mn1 130.7(3) . . ?
C24 O2 Tb1 135.3(3) . . ?
Mn1 O2 Tb1 93.53(14) . . ?
C32 O3 Mn1 131.5(3) . . ?
C32 O3 Tb1 132.8(3) . . ?
Mn1 O3 Tb1 94.60(13) . . ?
C40 O4 Mn2 130.6(3) . . ?
C40 O4 Tb1 132.7(3) . . ?
Mn2 O4 Tb1 94.19(13) . . ?
C48 O5 Mn2 129.2(3) . . ?
C48 O5 Tb1 136.5(3) . . ?
Mn2 O5 Tb1 94.17(13) . . ?
C56 O6 Mn2 131.8(3) . . ?
C56 O6 Tb1 133.6(3) . . ?
Mn2 O6 Tb1 94.61(14) . . ?
C16 O7 C17 116.6(5) . . ?
C23 O8 C25 118.1(5) . . ?
C31 O9 C33 117.1(5) . . ?
C31 O9 Tb1 114.9(4) . . ?
C33 O9 Tb1 127.4(4) . . ?
C39 O10 C41 117.1(5) . . ?
C39 O10 Tb1 114.0(3) . . ?
C41 O10 Tb1 127.7(4) . . ?
C47 O11 C49 118.2(4) . . ?
C55 O12 C57 117.8(5) . . ?
O3 Mn1 O1 75.87(14) . . ?
O3 Mn1 O2 76.85(14) . . ?
O1 Mn1 O2 76.94(14) . . ?
O3 Mn1 N2 148.53(17) . . ?
O1 Mn1 N2 124.22(17) . . ?
O2 Mn1 N2 84.31(16) . . ?
O3 Mn1 N1 122.92(17) . . ?
O1 Mn1 N1 84.61(16) . . ?
O2 Mn1 N1 148.73(17) . . ?
N2 Mn1 N1 85.56(18) . . ?
O3 Mn1 N3 84.60(17) . . ?
O1 Mn1 N3 148.06(17) . . ?
O2 Mn1 N3 123.13(18) . . ?
N2 Mn1 N3 84.94(19) . . ?
N1 Mn1 N3 85.19(19) . . ?
O3 Mn1 Tb1 45.68(9) . . ?
O1 Mn1 Tb1 45.49(10) . . ?
O2 Mn1 Tb1 45.84(10) . . ?
N2 Mn1 Tb1 128.58(13) . . ?
N1 Mn1 Tb1 128.58(13) . . ?
N3 Mn1 Tb1 128.56(14) . . ?
O4 Mn2 O6 75.62(14) . . ?
O4 Mn2 O5 77.11(14) . . ?
O6 Mn2 O5 76.04(14) . . ?
O4 Mn2 N5 147.54(17) . . ?
O6 Mn2 N5 125.39(17) . . ?
O5 Mn2 N5 84.30(16) . . ?
O4 Mn2 N4 84.98(16) . . ?
O6 Mn2 N4 148.16(17) . . ?
O5 Mn2 N4 124.22(18) . . ?
N5 Mn2 N4 83.82(18) . . ?
O4 Mn2 N6 123.73(17) . . ?
O6 Mn2 N6 84.34(17) . . ?
O5 Mn2 N6 146.80(18) . . ?
N5 Mn2 N6 85.68(18) . . ?
N4 Mn2 N6 85.9(2) . . ?
O4 Mn2 Tb1 45.82(10) . . ?
O6 Mn2 Tb1 45.30(9) . . ?
O5 Mn2 Tb1 45.31(9) . . ?
N5 Mn2 Tb1 128.47(13) . . ?
N4 Mn2 Tb1 129.04(13) . . ?
N6 Mn2 Tb1 128.43(14) . . ?
O5 Tb1 O6 68.18(13) . . ?
O5 Tb1 O1 112.95(13) . . ?
O6 Tb1 O1 177.91(13) . . ?
O5 Tb1 O3 175.40(14) . . ?
O6 Tb1 O3 112.07(13) . . ?
O1 Tb1 O3 66.96(13) . . ?
O5 Tb1 O2 107.47(13) . . ?
O6 Tb1 O2 113.03(13) . . ?
O1 Tb1 O2 68.49(12) . . ?
O3 Tb1 O2 68.08(13) . . ?
O5 Tb1 O4 68.66(13) . . ?
O6 Tb1 O4 67.06(13) . . ?
O1 Tb1 O4 111.53(13) . . ?
O3 Tb1 O4 115.81(12) . . ?
O2 Tb1 O4 175.95(13) . . ?
O5 Tb1 O9 124.85(12) . . ?
O6 Tb1 O9 64.82(12) . . ?
O1 Tb1 O9 113.32(12) . . ?
O3 Tb1 O9 58.00(12) . . ?
O2 Tb1 O9 116.19(12) . . ?
O4 Tb1 O9 67.69(12) . . ?
O5 Tb1 O10 116.70(13) . . ?
O6 Tb1 O10 112.88(12) . . ?
O1 Tb1 O10 65.07(12) . . ?
O3 Tb1 O10 67.65(12) . . ?
O2 Tb1 O10 124.91(12) . . ?
O4 Tb1 O10 57.50(12) . . ?
O9 Tb1 O10 61.41(12) . . ?
O5 Tb1 Mn1 137.32(9) . . ?
O6 Tb1 Mn1 140.33(9) . . ?
O1 Tb1 Mn1 40.00(9) . . ?
O3 Tb1 Mn1 39.73(9) . . ?
O2 Tb1 Mn1 40.63(9) . . ?
O4 Tb1 Mn1 141.72(9) . . ?
O9 Tb1 Mn1 97.71(9) . . ?
O10 Tb1 Mn1 84.29(8) . . ?
O5 Tb1 Mn2 40.52(9) . . ?
O6 Tb1 Mn2 40.10(9) . . ?
O1 Tb1 Mn2 139.71(9) . . ?
O3 Tb1 Mn2 142.36(9) . . ?
O2 Tb1 Mn2 137.54(9) . . ?
O4 Tb1 Mn2 39.98(9) . . ?
O9 Tb1 Mn2 84.41(9) . . ?
O10 Tb1 Mn2 97.47(8) . . ?
Mn1 Tb1 Mn2 177.73(2) . . ?
 
#====================================================================END
data_7

#----------------------------------------------------------------------------#
#                   CHEMICAL INFORMATION                                     #
#----------------------------------------------------------------------------#
 
_chemical_name_systematic
;
 ?
;
_chemical_formula_moiety                'C58 H60 Dy Mn2 N6 O12, C H4 O, N O3' 
_chemical_formula_sum                   'C59 H64 Dy Mn2 N7 O16'
_chemical_formula_weight                1399.55
_chemical_compound_source               'synthesis as described'
_chemical_absolute_configuration        ad
 
#----------------------------------------------------------------------------#
#                   UNIT CELL INFORMATION                                    #
#----------------------------------------------------------------------------#
 
_symmetry_cell_setting                  orthorhombic
_symmetry_space_group_name_H-M          'P 21 21 21'
_symmetry_space_group_name_Hall         'P 2ac 2ab'
_symmetry_Int_Tables_number             19
loop_
    _symmetry_equiv_pos_as_xyz
'x, y, z'
'-x+1/2, -y, z+1/2'
'x+1/2, -y+1/2, -z'
'-x, y+1/2, -z+1/2'
 
_cell_length_a                          15.6534(7)
_cell_length_b                          15.9509(8)
_cell_length_c                          24.4890(13)
_cell_angle_alpha                       90
_cell_angle_beta                        90
_cell_angle_gamma                       90
_cell_volume                            6114.6(5)
_cell_formula_units_Z                   4
_cell_measurement_temperature           180
_cell_measurement_reflns_used           6500
_cell_measurement_theta_min             2.7964
_cell_measurement_theta_max             32.1791
_cell_measurement_wavelength            0.71073
 
#----------------------------------------------------------------------------#
#                   CRYSTAL INFORMATION                                      #
#----------------------------------------------------------------------------#
 
_exptl_crystal_description              block
_exptl_crystal_colour                   yellow
_exptl_crystal_size_max                 0.35
_exptl_crystal_size_mid                 0.25
_exptl_crystal_size_min                 0.2
_exptl_crystal_density_diffrn           1.52
_exptl_crystal_density_method           'not measured'
_exptl_crystal_F_000                    2844
_exptl_special_details
;
 ?
;
 
#----------------------------------------------------------------------------#
#                   ABSORPTION CORRECTION                                    #
#----------------------------------------------------------------------------#
 
_exptl_absorpt_coefficient_mu           1.689
_exptl_absorpt_correction_type          multi-scan
_exptl_absorpt_process_details
;
        [c.f. r.h. blessing, acta cryst. (1995), a51, 33-38]
;
_exptl_absorpt_correction_T_min         0.551
_exptl_absorpt_correction_T_max         0.706
 

 
#----------------------------------------------------------------------------#
#                   DATA COLLECTION                                          #
#----------------------------------------------------------------------------#
 
_diffrn_ambient_temperature             180
_diffrn_radiation_type            MoK\a
_diffrn_radiation_source          'fine-focus sealed tube'
_diffrn_radiation_monochromator   graphite
_diffrn_measurement_device_type   'Oxford-Diffraction XCALIBUR'
_diffrn_measurement_method        \w-\f
_diffrn_detector_area_resol_mean  ?
_diffrn_standards_number          0
_diffrn_standards_interval_count  0
_diffrn_standards_interval_time   0
_diffrn_standards_decay_%         0
_diffrn_reflns_av_R_equivalents         0.0488
_diffrn_reflns_av_unetI/netI            0.0359
_diffrn_reflns_number                   46828
_diffrn_reflns_limit_h_min              -19
_diffrn_reflns_limit_h_max              19
_diffrn_reflns_limit_k_min              -19
_diffrn_reflns_limit_k_max              19
_diffrn_reflns_limit_l_min              -25
_diffrn_reflns_limit_l_max              30
_diffrn_reflns_theta_min                3.09
_diffrn_reflns_theta_max                26.37
_diffrn_reflns_theta_full               26.37
_diffrn_measured_fraction_theta_full
                                        0.996
_diffrn_measured_fraction_theta_max
                                        0.996
_reflns_number_total                    12461
_reflns_number_gt                       11486
_reflns_threshold_expression           >2\s(I)
                                     
#----------------------------------------------------------------------------#
#                   COMPUTER PROGRAMS USED                                   #
#----------------------------------------------------------------------------#
 
_computing_data_collection              'CrysAlis CCD, Oxford Diffraction Ltd.'
_computing_cell_refinement              'CrysAlis RED, Oxford Diffraction Ltd.'
_computing_data_reduction               'CrysAlis RED, Oxford Diffraction Ltd.'
_computing_structure_solution           'SIR92 (Giacovazzo et al, 1993)'
_computing_structure_refinement         'SHELXL-97 (Sheldrick, 1997)'
_computing_molecular_graphics           'Ortep-3 for Windows (Farrugia, 1997)'
_computing_publication_material
                                   'WinGX publication routines (Farrugia, 1999)'
 
#----------------------------------------------------------------------------#
#                   REFINEMENT INFORMATION                                   #
#----------------------------------------------------------------------------#
 
_refine_special_details
;
 Refinement of F^2^ against ALL reflections.  The weighted R-factor wR and
 goodness of fit S are based on F^2^, conventional R-factors R are based
 on F, with F set to zero for negative F^2^. The threshold expression of
 F^2^ > 2sigma(F^2^) is used only for calculating R-factors(gt) etc. and is
 not relevant to the choice of reflections for refinement.  R-factors based
 on F^2^ are statistically about twice as large as those based on F, and R-
 factors based on ALL data will be even larger.
;
_refine_ls_structure_factor_coef        Fsqd
_refine_ls_matrix_type                  full
_refine_ls_weighting_scheme             calc
_refine_ls_weighting_details
         'calc w=1/[\s^2^(Fo^2^)+(0.0622P)^2^+1.3764P] where P=(Fo^2^+2Fc^2^)/3'
_atom_sites_solution_primary            direct
_atom_sites_solution_secondary          difmap
_atom_sites_solution_hydrogens          geom
_refine_ls_hydrogen_treatment           constr
_refine_ls_extinction_method            none
_refine_ls_number_reflns                12461
_refine_ls_number_parameters            776
_refine_ls_number_restraints            0
_refine_ls_R_factor_all                 0.0391
_refine_ls_R_factor_gt                  0.0358
_refine_ls_wR_factor_ref                0.0957
_refine_ls_wR_factor_gt                 0.0931
_refine_ls_goodness_of_fit_ref          1.06
_refine_ls_restrained_S_all             1.06
_refine_ls_shift/su_max                 0.002
_refine_ls_shift/su_mean                0
_refine_ls_abs_structure_details
                                    'Flack H D (1983), Acta Cryst. A39, 876-881'
_refine_ls_abs_structure_Flack          -0.023(6)
_refine_diff_density_max                0.903
_refine_diff_density_min                -1.191
_refine_diff_density_rms                0.097
 
#----------------------------------------------------------------------------#
#                   ATOMIC TYPES, COORDINATES AND THERMAL PARAMETERS         #
#----------------------------------------------------------------------------#
 
loop_
    _atom_type_symbol
    _atom_type_description
    _atom_type_scat_dispersion_real
    _atom_type_scat_dispersion_imag
    _atom_type_scat_source
C C 0.0033 0.0016 'International Tables Vol C Tables 4.2.6.8 and 6.1.1.4'
H H 0 0 'International Tables Vol C Tables 4.2.6.8 and 6.1.1.4'
N N 0.0061 0.0033 'International Tables Vol C Tables 4.2.6.8 and 6.1.1.4'
O O 0.0106 0.006 'International Tables Vol C Tables 4.2.6.8 and 6.1.1.4'
Mn Mn 0.3368 0.7283 'International Tables Vol C Tables 4.2.6.8 and 6.1.1.4'
Dy Dy -0.1892 4.4098 'International Tables Vol C Tables 4.2.6.8 and 6.1.1.4'
 
loop_
    _atom_site_label
    _atom_site_type_symbol
    _atom_site_fract_x
    _atom_site_fract_y
    _atom_site_fract_z
    _atom_site_U_iso_or_equiv
    _atom_site_adp_type
    _atom_site_occupancy
    _atom_site_symmetry_multiplicity
    _atom_site_calc_flag
    _atom_site_refinement_flags
    _atom_site_disorder_assembly
    _atom_site_disorder_group
C1 C 1.2608(3) 1.0017(3) 0.4907(2) 0.0399(11) Uani 1 1 d . . .
H1A H 1.3174 0.9961 0.475 0.048 Uiso 1 1 calc R . .
H1B H 1.2602 0.971 0.5249 0.048 Uiso 1 1 calc R . .
C2 C 1.1738(3) 1.1065(3) 0.5459(2) 0.0446(12) Uani 1 1 d . . .
H2A H 1.1984 1.0954 0.5815 0.054 Uiso 1 1 calc R . .
H2B H 1.1555 1.1646 0.5454 0.054 Uiso 1 1 calc R . .
C3 C 1.2204(3) 1.1433(3) 0.4492(2) 0.0391(11) Uani 1 1 d . . .
H3A H 1.2325 1.2023 0.4547 0.047 Uiso 1 1 calc R . .
H3B H 1.257 1.1236 0.4199 0.047 Uiso 1 1 calc R . .
C4 C 1.2435(3) 1.0947(3) 0.5025(2) 0.0308(10) Uani 1 1 d . . .
C5 C 1.3255(3) 1.1327(3) 0.5246(2) 0.0444(12) Uani 1 1 d . . .
H5A H 1.3136 1.1868 0.5399 0.067 Uiso 1 1 calc R . .
H5B H 1.3661 1.1384 0.4955 0.067 Uiso 1 1 calc R . .
H5C H 1.3486 1.0968 0.5524 0.067 Uiso 1 1 calc R . .
C6 C 0.5202(3) 0.8075(3) 0.3579(2) 0.0397(11) Uani 1 1 d . . .
H6A H 0.464 0.8328 0.3602 0.048 Uiso 1 1 calc R . .
H6B H 0.5187 0.7556 0.3785 0.048 Uiso 1 1 calc R . .
C7 C 0.6048(3) 0.7177(3) 0.2930(2) 0.0425(11) Uani 1 1 d . . .
H7A H 0.5782 0.6647 0.3024 0.051 Uiso 1 1 calc R . .
H7B H 0.6225 0.7145 0.2551 0.051 Uiso 1 1 calc R . .
C8 C 0.5652(3) 0.8662(3) 0.2659(2) 0.0363(10) Uani 1 1 d . . .
H8A H 0.5538 0.8562 0.2275 0.044 Uiso 1 1 calc R . .
H8B H 0.5298 0.9128 0.2774 0.044 Uiso 1 1 calc R . .
C9 C 0.5388(3) 0.7871(3) 0.29869(18) 0.0290(9) Uani 1 1 d . . .
C10 C 0.4559(3) 0.7541(4) 0.2731(2) 0.0470(13) Uani 1 1 d . . .
H10A H 0.4687 0.7269 0.2391 0.07 Uiso 1 1 calc R . .
H10B H 0.4176 0.8 0.2666 0.07 Uiso 1 1 calc R . .
H10C H 0.4296 0.7147 0.2974 0.07 Uiso 1 1 calc R . .
C11 C 1.2283(3) 0.9103(3) 0.41861(19) 0.0326(10) Uani 1 1 d . . .
H11 H 1.2872 0.9026 0.4191 0.039 Uiso 1 1 calc R . .
C12 C 1.1810(3) 0.8608(3) 0.37902(17) 0.0269(9) Uani 1 1 d . . .
C13 C 1.2298(3) 0.8018(3) 0.3492(2) 0.0345(10) Uani 1 1 d . . .
H13 H 1.2887 0.8002 0.3539 0.041 Uiso 1 1 calc R . .
C14 C 1.1924(3) 0.7471(3) 0.31357(19) 0.0352(10) Uani 1 1 d . . .
H14 H 1.2255 0.7076 0.2953 0.042 Uiso 1 1 calc R . .
C15 C 1.1036(3) 0.7509(3) 0.30455(17) 0.0310(9) Uani 1 1 d . . .
H15 H 1.078 0.7142 0.28 0.037 Uiso 1 1 calc R . .
C16 C 1.0554(3) 0.8083(3) 0.33185(16) 0.0256(8) Uani 1 1 d . . .
C17 C 1.0916(3) 0.8637(2) 0.36917(18) 0.0289(10) Uani 1 1 d . . .
C18 C 0.9295(3) 0.7664(3) 0.28592(18) 0.0319(9) Uani 1 1 d . . .
H18A H 0.9557 0.777 0.2511 0.048 Uiso 1 1 calc R . .
H18B H 0.8697 0.7793 0.2839 0.048 Uiso 1 1 calc R . .
H18C H 0.9367 0.7084 0.2953 0.048 Uiso 1 1 calc R . .
C19 C 1.0640(3) 1.0235(3) 0.58178(19) 0.0370(11) Uani 1 1 d . . .
H19 H 1.0919 1.0353 0.6144 0.044 Uiso 1 1 calc R . .
C20 C 0.9867(3) 0.9743(3) 0.58605(19) 0.0347(10) Uani 1 1 d . . .
C21 C 0.9545(3) 0.9615(3) 0.63914(19) 0.0382(11) Uani 1 1 d . . .
H21 H 0.9861 0.9808 0.6688 0.046 Uiso 1 1 calc R . .
C22 C 0.8799(3) 0.9225(3) 0.64856(19) 0.0395(11) Uani 1 1 d . . .
H22 H 0.8598 0.9162 0.6841 0.047 Uiso 1 1 calc R . .
C23 C 0.8327(3) 0.8914(3) 0.60426(19) 0.0359(10) Uani 1 1 d . . .
H23 H 0.7808 0.8646 0.6104 0.043 Uiso 1 1 calc R . .
C24 C 0.8623(3) 0.9001(3) 0.55233(18) 0.0293(9) Uani 1 1 d . . .
C25 C 0.9397(3) 0.9432(3) 0.54058(16) 0.0285(9) Uani 1 1 d . . .
C26 C 0.7467(3) 0.8254(3) 0.5131(2) 0.0403(11) Uani 1 1 d . . .
H26A H 0.7588 0.7764 0.5345 0.06 Uiso 1 1 calc R . .
H26B H 0.7248 0.8088 0.4781 0.06 Uiso 1 1 calc R . .
H26C H 0.7051 0.8592 0.5316 0.06 Uiso 1 1 calc R . .
C27 C 1.0974(3) 1.1991(3) 0.4103(2) 0.0337(9) Uani 1 1 d . . .
H27 H 1.1316 1.2467 0.4085 0.04 Uiso 1 1 calc R . .
C28 C 1.0115(3) 1.2075(3) 0.38790(18) 0.0285(9) Uani 1 1 d . . .
C29 C 0.9918(3) 1.2851(3) 0.36414(18) 0.0312(9) Uani 1 1 d . . .
H29 H 1.0328 1.3272 0.3648 0.037 Uiso 1 1 calc R . .
C30 C 0.9151(3) 1.3015(3) 0.34017(19) 0.0355(10) Uani 1 1 d . . .
H30 H 0.9039 1.3538 0.325 0.043 Uiso 1 1 calc R . .
C31 C 0.8531(3) 1.2375(3) 0.33883(18) 0.0315(9) Uani 1 1 d . . .
H31 H 0.8005 1.247 0.3223 0.038 Uiso 1 1 calc R . .
C32 C 0.8707(3) 1.1612(3) 0.36202(16) 0.0265(9) Uani 1 1 d . . .
C33 C 0.9495(3) 1.1427(2) 0.38761(15) 0.0240(8) Uani 1 1 d . . .
C34 C 0.7359(3) 1.1055(3) 0.3342(2) 0.0352(10) Uani 1 1 d . . .
H34A H 0.704 1.1489 0.3521 0.053 Uiso 1 1 calc R . .
H34B H 0.7039 1.0541 0.3353 0.053 Uiso 1 1 calc R . .
H34C H 0.746 1.1211 0.2969 0.053 Uiso 1 1 calc R . .
C35 C 0.5533(3) 0.9214(3) 0.41553(19) 0.0354(11) Uani 1 1 d . . .
H35 H 0.4941 0.9232 0.4186 0.043 Uiso 1 1 calc R . .
C36 C 0.5995(3) 0.9825(3) 0.44704(18) 0.0311(9) Uani 1 1 d . . .
C37 C 0.5511(3) 1.0346(3) 0.4809(2) 0.0385(11) Uani 1 1 d . . .
H37 H 0.4919 1.0298 0.4803 0.046 Uiso 1 1 calc R . .
C38 C 0.5876(3) 1.0921(4) 0.5148(2) 0.0457(13) Uani 1 1 d . . .
H38 H 0.5536 1.1257 0.537 0.055 Uiso 1 1 calc R . .
C39 C 0.6759(3) 1.1000(3) 0.5159(2) 0.0371(10) Uani 1 1 d . . .
H39 H 0.7012 1.138 0.5398 0.044 Uiso 1 1 calc R . .
C40 C 0.7261(3) 1.0526(3) 0.48247(17) 0.0292(9) Uani 1 1 d . . .
C41 C 0.6918(3) 0.9933(3) 0.44724(18) 0.0309(10) Uani 1 1 d . . .
C42 C 0.8545(3) 1.1167(3) 0.5124(2) 0.0345(10) Uani 1 1 d . . .
H42A H 0.8333 1.1712 0.5027 0.052 Uiso 1 1 calc R . .
H42B H 0.915 1.1146 0.506 0.052 Uiso 1 1 calc R . .
H42C H 0.8431 1.1063 0.5503 0.052 Uiso 1 1 calc R . .
C43 C 0.7226(3) 0.6624(3) 0.34228(18) 0.0322(10) Uani 1 1 d . . .
H43 H 0.6985 0.6118 0.3314 0.039 Uiso 1 1 calc R . .
C44 C 0.8012(3) 0.6565(3) 0.37353(18) 0.0304(9) Uani 1 1 d . . .
C45 C 0.8373(3) 0.5754(3) 0.37789(19) 0.0346(10) Uani 1 1 d . . .
H45 H 0.8093 0.5303 0.3618 0.042 Uiso 1 1 calc R . .
C46 C 0.9121(3) 0.5618(3) 0.4051(2) 0.0365(10) Uani 1 1 d . . .
H46 H 0.9348 0.508 0.4072 0.044 Uiso 1 1 calc R . .
C47 C 0.9545(3) 0.6289(3) 0.42978(19) 0.0312(9) Uani 1 1 d . . .
H47 H 1.0052 0.6201 0.4487 0.037 Uiso 1 1 calc R . .
C48 C 0.9204(3) 0.7083(3) 0.42580(18) 0.0262(9) Uani 1 1 d . . .
C49 C 0.8447(3) 0.7259(2) 0.39677(17) 0.0269(9) Uani 1 1 d . . .
C50 C 1.0320(3) 0.7673(3) 0.4805(2) 0.0345(10) Uani 1 1 d . . .
H50A H 1.0193 0.7295 0.5099 0.052 Uiso 1 1 calc R . .
H50B H 1.0501 0.8202 0.4952 0.052 Uiso 1 1 calc R . .
H50C H 1.0769 0.7442 0.4584 0.052 Uiso 1 1 calc R . .
C51 C 0.6959(3) 0.9101(3) 0.22825(19) 0.0335(10) Uani 1 1 d . . .
H51 H 0.6659 0.9043 0.1957 0.04 Uiso 1 1 calc R . .
C52 C 0.7826(3) 0.9407(3) 0.22390(16) 0.0287(8) Uani 1 1 d . . .
C53 C 0.8086(3) 0.9629(3) 0.17077(19) 0.0370(11) Uani 1 1 d . . .
H53 H 0.7716 0.9537 0.1417 0.044 Uiso 1 1 calc R . .
C54 C 0.8874(3) 0.9977(3) 0.16089(19) 0.0374(10) Uani 1 1 d . . .
H54 H 0.9036 1.0119 0.1255 0.045 Uiso 1 1 calc R . .
C55 C 0.9432(3) 1.0118(3) 0.20475(19) 0.0330(10) Uani 1 1 d . . .
H55 H 0.9961 1.0366 0.1988 0.04 Uiso 1 1 calc R . .
C56 C 0.9195(3) 0.9888(3) 0.25638(18) 0.0272(9) Uani 1 1 d . . .
C57 C 0.8391(3) 0.9514(3) 0.26830(16) 0.0259(9) Uani 1 1 d . . .
C58 C 1.0517(3) 1.0344(3) 0.2944(2) 0.0367(11) Uani 1 1 d . . .
H58A H 1.0847 0.9979 0.2714 0.055 Uiso 1 1 calc R . .
H58B H 1.0797 1.0405 0.329 0.055 Uiso 1 1 calc R . .
H58C H 1.0465 1.0883 0.2773 0.055 Uiso 1 1 calc R . .
C100 C 0.2778(5) 0.9173(6) 0.2180(3) 0.083(2) Uani 1 1 d . . .
H10D H 0.2945 0.8725 0.2419 0.125 Uiso 1 1 calc R . .
H10E H 0.2583 0.8944 0.184 0.125 Uiso 1 1 calc R . .
H10F H 0.2326 0.9489 0.2346 0.125 Uiso 1 1 calc R . .
N1 N 1.1980(3) 0.9636(2) 0.45320(17) 0.0357(9) Uani 1 1 d . . .
N2 N 1.0984(3) 1.0526(3) 0.53869(16) 0.0389(9) Uani 1 1 d . . .
N3 N 1.1312(2) 1.1346(3) 0.43205(17) 0.0373(9) Uani 1 1 d . . .
N4 N 0.5834(2) 0.8649(2) 0.38366(15) 0.0322(8) Uani 1 1 d . . .
N5 N 0.6818(3) 0.7292(2) 0.32770(17) 0.0350(9) Uani 1 1 d . . .
N6 N 0.6555(2) 0.8901(2) 0.27208(16) 0.0311(8) Uani 1 1 d . . .
N10 N 0.3983(4) 1.0285(4) 0.3385(2) 0.0665(14) Uani 1 1 d . . .
O1 O 0.96235(16) 1.06753(17) 0.40857(12) 0.0263(5) Uani 1 1 d . . .
O2 O 0.96305(18) 0.95255(19) 0.48981(11) 0.0283(6) Uani 1 1 d . . .
O3 O 1.04164(17) 0.91819(17) 0.39661(12) 0.0271(6) Uani 1 1 d . . .
O4 O 0.82147(17) 0.9289(2) 0.31853(11) 0.0267(6) Uani 1 1 d . . .
O5 O 0.74078(17) 0.94784(18) 0.41433(12) 0.0278(6) Uani 1 1 d . . .
O6 O 0.81833(18) 0.80391(17) 0.39351(12) 0.0275(6) Uani 1 1 d . . .
O7 O 0.96901(19) 0.81788(19) 0.32677(12) 0.0302(7) Uani 1 1 d . . .
O8 O 0.8222(2) 0.87207(19) 0.50586(12) 0.0320(7) Uani 1 1 d . . .
O9 O 0.8152(2) 1.09399(19) 0.36131(13) 0.0334(7) Uani 1 1 d . . .
O10 O 0.81315(18) 1.05484(19) 0.48007(12) 0.0306(6) Uani 1 1 d . . .
O11 O 0.95734(19) 0.77923(18) 0.44785(13) 0.0307(7) Uani 1 1 d . . .
O12 O 0.96902(19) 0.99945(19) 0.30242(12) 0.0302(7) Uani 1 1 d . . .
O20 O 0.3981(3) 1.0571(3) 0.3848(2) 0.0763(13) Uani 1 1 d . . .
O21 O 0.4281(7) 1.0667(5) 0.3013(3) 0.171(4) Uani 1 1 d . . .
O22 O 0.3802(4) 0.9554(3) 0.3279(2) 0.0848(15) Uani 1 1 d . . .
O23 O 0.3469(3) 0.9691(3) 0.20871(19) 0.0743(14) Uani 1 1 d . . .
H23A H 0.3604 0.9924 0.2373 0.112 Uiso 1 1 calc R . .
Mn1 Mn 1.06939(4) 1.01624(4) 0.45383(3) 0.02439(13) Uani 1 1 d . . .
Mn2 Mn 0.71321(4) 0.85930(4) 0.35073(3) 0.02442(13) Uani 1 1 d . . .
Dy1 Dy 0.890894(12) 0.935144(12) 0.404587(8) 0.02746(6) Uani 1 1 d . . .
 
loop_
    _atom_site_aniso_label
    _atom_site_aniso_U_11
    _atom_site_aniso_U_22
    _atom_site_aniso_U_33
    _atom_site_aniso_U_23
    _atom_site_aniso_U_13
    _atom_site_aniso_U_12
C1 0.032(2) 0.043(3) 0.044(3) -0.005(2) -0.012(2) 0.001(2)
C2 0.042(3) 0.041(3) 0.051(3) -0.012(2) -0.008(2) -0.011(2)
C3 0.033(2) 0.033(2) 0.052(3) -0.003(2) -0.011(2) -0.008(2)
C4 0.030(2) 0.024(2) 0.039(3) -0.0027(18) -0.0098(19) 0.0010(17)
C5 0.031(2) 0.038(3) 0.065(3) -0.009(2) -0.014(2) -0.004(2)
C6 0.038(3) 0.037(3) 0.044(3) 0.002(2) -0.002(2) -0.013(2)
C7 0.039(2) 0.042(3) 0.047(3) -0.003(2) -0.007(2) -0.014(2)
C8 0.029(2) 0.043(3) 0.037(3) 0.007(2) -0.0057(19) 0.001(2)
C9 0.0213(19) 0.034(2) 0.032(2) 0.0031(18) -0.0038(17) -0.0092(17)
C10 0.031(2) 0.053(3) 0.057(3) -0.003(3) -0.011(2) -0.013(2)
C11 0.030(2) 0.032(2) 0.036(3) 0.0030(18) -0.0032(18) -0.0009(18)
C12 0.026(2) 0.030(2) 0.024(2) -0.0003(17) -0.0031(17) -0.0033(18)
C13 0.024(2) 0.044(3) 0.035(2) -0.001(2) 0.0041(18) 0.0046(19)
C14 0.036(2) 0.037(3) 0.032(2) -0.0069(19) 0.0042(19) 0.009(2)
C15 0.036(2) 0.032(2) 0.025(2) -0.0050(17) -0.0020(19) 0.004(2)
C16 0.029(2) 0.029(2) 0.0187(19) 0.0005(16) 0.0000(16) -0.0002(17)
C17 0.037(2) 0.0140(18) 0.035(2) 0.0115(16) 0.0225(18) 0.0106(16)
C18 0.034(2) 0.036(2) 0.025(2) -0.0060(18) -0.0035(18) -0.0039(19)
C19 0.042(3) 0.040(3) 0.029(3) -0.0033(19) -0.0106(19) 0.003(2)
C20 0.040(2) 0.034(2) 0.030(2) 0.0003(19) -0.0058(19) 0.007(2)
C21 0.053(3) 0.036(3) 0.026(2) -0.0045(18) -0.003(2) 0.011(2)
C22 0.057(3) 0.035(2) 0.027(2) 0.0026(19) 0.006(2) 0.006(2)
C23 0.038(2) 0.036(2) 0.034(3) 0.0061(19) 0.007(2) 0.0031(19)
C24 0.031(2) 0.031(2) 0.026(2) -0.0016(17) 0.0024(17) 0.0037(17)
C25 0.036(2) 0.028(2) 0.0214(19) -0.0018(17) 0.0013(17) 0.0063(19)
C26 0.040(3) 0.034(3) 0.046(3) 0.000(2) 0.005(2) -0.011(2)
C27 0.036(2) 0.0223(19) 0.043(3) -0.0017(18) -0.007(2) -0.0054(17)
C28 0.029(2) 0.028(2) 0.028(2) -0.0031(17) 0.0001(17) 0.0026(17)
C29 0.041(2) 0.023(2) 0.030(2) -0.0024(17) -0.0009(19) -0.0059(18)
C30 0.046(3) 0.025(2) 0.035(2) 0.0016(18) -0.004(2) 0.0013(19)
C31 0.037(2) 0.028(2) 0.030(2) 0.0019(18) -0.0097(18) 0.0032(18)
C32 0.035(2) 0.023(2) 0.021(2) -0.0021(15) 0.0014(16) -0.0043(16)
C33 0.034(2) 0.0191(19) 0.0188(19) -0.0045(15) -0.0028(15) 0.0019(16)
C34 0.028(2) 0.042(3) 0.036(3) -0.002(2) -0.0020(19) 0.006(2)
C35 0.0170(18) 0.049(3) 0.040(3) 0.009(2) 0.0025(17) -0.0039(19)
C36 0.024(2) 0.037(2) 0.032(2) 0.0015(18) -0.0035(18) 0.0031(19)
C37 0.025(2) 0.054(3) 0.037(3) -0.003(2) 0.0052(19) 0.007(2)
C38 0.038(3) 0.056(3) 0.043(3) -0.013(2) 0.007(2) 0.018(2)
C39 0.041(3) 0.040(2) 0.031(2) -0.0115(19) -0.002(2) 0.005(2)
C40 0.029(2) 0.033(2) 0.026(2) 0.0006(18) 0.0020(17) 0.0055(18)
C41 0.038(2) 0.030(2) 0.026(2) 0.0179(18) 0.0148(18) 0.0215(19)
C42 0.035(2) 0.031(2) 0.038(3) -0.0055(19) -0.004(2) -0.0022(19)
C43 0.040(2) 0.029(2) 0.028(2) -0.0007(17) -0.0003(19) -0.0088(19)
C44 0.033(2) 0.022(2) 0.036(2) -0.0009(17) 0.0031(18) -0.0047(17)
C45 0.040(2) 0.028(2) 0.035(2) -0.0008(19) 0.0095(19) -0.001(2)
C46 0.039(2) 0.026(2) 0.045(2) 0.000(2) 0.012(2) 0.0074(17)
C47 0.030(2) 0.026(2) 0.037(2) 0.0053(18) 0.0036(18) 0.0047(17)
C48 0.0242(19) 0.025(2) 0.030(2) 0.0014(16) 0.0027(16) 0.0016(16)
C49 0.032(2) 0.0216(19) 0.027(2) 0.0057(16) 0.0022(17) 0.0000(16)
C50 0.032(2) 0.036(2) 0.035(2) 0.0016(19) -0.010(2) 0.0076(19)
C51 0.034(2) 0.037(2) 0.030(2) 0.0013(18) -0.0061(18) 0.0003(18)
C52 0.030(2) 0.031(2) 0.024(2) 0.0024(18) -0.0004(16) -0.0041(19)
C53 0.036(2) 0.047(3) 0.028(2) 0.0046(19) -0.0078(19) -0.001(2)
C54 0.034(2) 0.048(3) 0.031(2) 0.0073(19) 0.002(2) -0.007(2)
C55 0.033(2) 0.035(2) 0.031(2) 0.0054(19) 0.0060(19) -0.0034(19)
C56 0.0254(19) 0.024(2) 0.032(2) 0.0029(17) -0.0030(17) -0.0011(16)
C57 0.0253(19) 0.029(2) 0.023(2) 0.0001(16) 0.0010(15) 0.0014(16)
C58 0.028(2) 0.043(3) 0.039(3) 0.006(2) 0.000(2) -0.0067(19)
C100 0.080(5) 0.100(6) 0.070(5) 0.038(4) -0.016(4) -0.021(4)
N1 0.041(2) 0.0285(19) 0.038(2) -0.0064(16) -0.0053(18) -0.0001(16)
N2 0.038(2) 0.043(2) 0.037(2) -0.0097(17) -0.0072(17) -0.0011(19)
N3 0.032(2) 0.033(2) 0.048(2) -0.0013(18) -0.0038(17) -0.0073(16)
N4 0.0280(18) 0.036(2) 0.033(2) 0.0023(17) 0.0005(15) -0.0073(16)
N5 0.039(2) 0.0291(19) 0.037(2) 0.0014(16) -0.0048(18) -0.0038(17)
N6 0.0232(18) 0.036(2) 0.034(2) 0.0042(16) -0.0024(15) -0.0005(15)
N10 0.093(4) 0.056(3) 0.051(3) 0.012(3) -0.004(3) 0.004(3)
O1 0.0269(13) 0.0203(13) 0.0318(14) 0.0019(14) -0.0039(12) 0.0010(11)
O2 0.0267(14) 0.0342(17) 0.0240(15) -0.0004(12) -0.0009(12) -0.0014(12)
O3 0.0245(13) 0.0271(15) 0.0298(16) -0.0025(12) 0.0009(12) -0.0010(11)
O4 0.0232(13) 0.0349(16) 0.0220(14) 0.0067(13) -0.0008(11) -0.0021(13)
O5 0.0256(13) 0.0269(15) 0.0311(16) 0.0014(12) 0.0013(12) 0.0006(11)
O6 0.0295(14) 0.0213(14) 0.0317(17) 0.0017(11) -0.0023(12) -0.0001(12)
O7 0.0313(15) 0.0301(16) 0.0291(16) -0.0058(12) -0.0052(13) -0.0058(13)
O8 0.0323(16) 0.0328(16) 0.0309(16) 0.0020(13) 0.0010(13) -0.0048(13)
O9 0.0343(16) 0.0304(16) 0.0355(18) 0.0076(13) -0.0067(14) -0.0009(13)
O10 0.0283(14) 0.0288(16) 0.0347(16) -0.0047(13) -0.0002(12) 0.0009(13)
O11 0.0304(15) 0.0257(15) 0.0360(17) 0.0009(13) -0.0061(13) 0.0000(12)
O12 0.0284(15) 0.0341(17) 0.0280(16) -0.0006(13) -0.0007(12) -0.0073(12)
O20 0.078(3) 0.082(3) 0.069(3) -0.014(3) -0.014(2) 0.016(3)
O21 0.306(12) 0.104(5) 0.102(5) 0.052(5) 0.045(7) 0.004(7)
O22 0.087(4) 0.077(4) 0.091(4) -0.023(3) 0.009(3) -0.006(3)
O23 0.094(4) 0.082(4) 0.047(3) 0.009(2) 0.003(3) -0.023(3)
Mn1 0.0245(3) 0.0222(3) 0.0265(3) -0.0023(2) -0.0040(3) -0.0006(2)
Mn2 0.0234(3) 0.0245(3) 0.0254(3) 0.0017(3) -0.0015(2) -0.0027(2)
Dy1 0.02420(9) 0.02782(10) 0.03035(10) -0.00136(8) -0.00251(8) -0.00241(8)
 
 
#----------------------------------------------------------------------------#
#                   MOLECULAR GEOMETRY                                       #
#----------------------------------------------------------------------------#
 
_geom_special_details
;
 All esds (except the esd in the dihedral angle between two l.s. planes)
 are estimated using the full covariance matrix.  The cell esds are taken
 into account individually in the estimation of esds in distances, angles
 and torsion angles; correlations between esds in cell parameters are only
 used when they are defined by crystal symmetry.  An approximate (isotropic)
 treatment of cell esds is used for estimating esds involving l.s. planes.
;
loop_
    _geom_bond_atom_site_label_1
    _geom_bond_atom_site_label_2
    _geom_bond_distance
    _geom_bond_site_symmetry_2
    _geom_bond_publ_flag
C1 N1 1.476(6) . ?
C1 C4 1.536(7) . ?
C2 N2 1.471(6) . ?
C2 C4 1.534(7) . ?
C3 N3 1.464(6) . ?
C3 C4 1.560(7) . ?
C4 C5 1.520(6) . ?
C6 N4 1.488(6) . ?
C6 C9 1.513(7) . ?
C7 N5 1.486(6) . ?
C7 C9 1.520(7) . ?
C8 N6 1.472(6) . ?
C8 C9 1.552(6) . ?
C9 C10 1.534(6) . ?
C11 N1 1.291(6) . ?
C11 C12 1.452(6) . ?
C12 C13 1.416(6) . ?
C12 C17 1.421(6) . ?
C13 C14 1.365(7) . ?
C14 C15 1.409(7) . ?
C15 C16 1.362(6) . ?
C16 O7 1.367(5) . ?
C16 C17 1.392(6) . ?
C17 O3 1.349(5) . ?
C18 O7 1.435(5) . ?
C19 N2 1.272(6) . ?
C19 C20 1.445(7) . ?
C20 C21 1.409(7) . ?
C20 C25 1.424(6) . ?
C21 C22 1.343(7) . ?
C22 C23 1.404(7) . ?
C23 C24 1.361(6) . ?
C24 O8 1.375(5) . ?
C24 C25 1.422(6) . ?
C25 O2 1.304(5) . ?
C26 O8 1.408(5) . ?
C27 N3 1.275(6) . ?
C27 C28 1.458(6) . ?
C28 C29 1.402(6) . ?
C28 C33 1.418(6) . ?
C29 C30 1.361(6) . ?
C30 C31 1.408(7) . ?
C31 C32 1.372(6) . ?
C32 O9 1.380(5) . ?
C32 C33 1.415(6) . ?
C33 O1 1.319(5) . ?
C34 O9 1.420(5) . ?
C35 N4 1.283(6) . ?
C35 C36 1.438(6) . ?
C36 C37 1.396(6) . ?
C36 C41 1.455(6) . ?
C37 C38 1.362(7) . ?
C38 C39 1.389(7) . ?
C39 C40 1.364(6) . ?
C40 O10 1.364(5) . ?
C40 C41 1.388(7) . ?
C41 O5 1.329(5) . ?
C42 O10 1.421(5) . ?
C43 N5 1.292(6) . ?
C43 C44 1.453(6) . ?
C44 C45 1.415(6) . ?
C44 C49 1.419(6) . ?
C45 C46 1.365(7) . ?
C46 C47 1.397(7) . ?
C47 C48 1.378(6) . ?
C48 O11 1.381(5) . ?
C48 C49 1.410(6) . ?
C49 O6 1.314(5) . ?
C50 O11 1.430(5) . ?
C51 N6 1.286(6) . ?
C51 C52 1.446(6) . ?
C52 C53 1.409(6) . ?
C52 C57 1.413(6) . ?
C53 C54 1.374(7) . ?
C54 C55 1.402(7) . ?
C55 C56 1.367(6) . ?
C56 O12 1.379(5) . ?
C56 C57 1.423(6) . ?
C57 O4 1.311(5) . ?
C58 O12 1.422(5) . ?
C100 O23 1.379(8) . ?
N1 Mn1 2.181(4) . ?
N2 Mn1 2.205(4) . ?
N3 Mn1 2.187(4) . ?
N4 Mn2 2.188(4) . ?
N5 Mn2 2.206(4) . ?
N6 Mn2 2.183(4) . ?
N10 O21 1.192(8) . ?
N10 O20 1.222(7) . ?
N10 O22 1.227(7) . ?
O1 Mn1 2.169(3) . ?
O1 Dy1 2.392(3) . ?
O2 Mn1 2.140(3) . ?
O2 Dy1 2.389(3) . ?
O3 Mn1 2.144(3) . ?
O3 Dy1 2.383(3) . ?
O4 Mn2 2.174(3) . ?
O4 Dy1 2.373(3) . ?
O5 Mn2 2.146(3) . ?
O5 Dy1 2.371(3) . ?
O6 Mn2 2.142(3) . ?
O6 Dy1 2.397(3) . ?
O8 Dy1 2.884(3) . ?
O11 Dy1 2.896(3) . ?
Mn1 Dy1 3.3067(6) . ?
Mn2 Dy1 3.3074(6) . ?
 
loop_
    _geom_angle_atom_site_label_1
    _geom_angle_atom_site_label_2
    _geom_angle_atom_site_label_3
    _geom_angle
    _geom_angle_site_symmetry_1
    _geom_angle_site_symmetry_3
    _geom_angle_publ_flag
N1 C1 C4 113.4(4) . . ?
N2 C2 C4 114.6(4) . . ?
N3 C3 C4 114.4(4) . . ?
C5 C4 C2 107.8(4) . . ?
C5 C4 C1 107.6(4) . . ?
C2 C4 C1 111.9(4) . . ?
C5 C4 C3 107.2(4) . . ?
C2 C4 C3 110.7(4) . . ?
C1 C4 C3 111.4(4) . . ?
N4 C6 C9 114.3(4) . . ?
N5 C7 C9 114.2(4) . . ?
N6 C8 C9 114.4(4) . . ?
C6 C9 C7 111.9(4) . . ?
C6 C9 C10 107.7(4) . . ?
C7 C9 C10 106.7(4) . . ?
C6 C9 C8 111.9(4) . . ?
C7 C9 C8 111.3(4) . . ?
C10 C9 C8 107.0(4) . . ?
N1 C11 C12 127.4(4) . . ?
C13 C12 C17 117.7(4) . . ?
C13 C12 C11 115.5(4) . . ?
C17 C12 C11 126.7(4) . . ?
C14 C13 C12 121.6(4) . . ?
C13 C14 C15 119.7(4) . . ?
C16 C15 C14 119.9(4) . . ?
C15 C16 O7 125.4(4) . . ?
C15 C16 C17 121.6(4) . . ?
O7 C16 C17 113.0(4) . . ?
O3 C17 C16 120.0(4) . . ?
O3 C17 C12 120.5(4) . . ?
C16 C17 C12 119.5(4) . . ?
N2 C19 C20 127.7(4) . . ?
C21 C20 C25 119.1(4) . . ?
C21 C20 C19 116.4(4) . . ?
C25 C20 C19 124.4(4) . . ?
C22 C21 C20 122.5(5) . . ?
C21 C22 C23 119.3(4) . . ?
C24 C23 C22 120.4(5) . . ?
C23 C24 O8 125.7(4) . . ?
C23 C24 C25 122.0(4) . . ?
O8 C24 C25 112.3(4) . . ?
O2 C25 C24 119.1(4) . . ?
O2 C25 C20 124.1(4) . . ?
C24 C25 C20 116.8(4) . . ?
N3 C27 C28 128.0(4) . . ?
C29 C28 C33 119.4(4) . . ?
C29 C28 C27 116.2(4) . . ?
C33 C28 C27 124.4(4) . . ?
C30 C29 C28 122.9(4) . . ?
C29 C30 C31 118.6(4) . . ?
C32 C31 C30 119.7(4) . . ?
C31 C32 O9 123.9(4) . . ?
C31 C32 C33 122.9(4) . . ?
O9 C32 C33 113.1(4) . . ?
O1 C33 C32 119.6(4) . . ?
O1 C33 C28 123.9(4) . . ?
C32 C33 C28 116.5(4) . . ?
N4 C35 C36 128.2(4) . . ?
C37 C36 C35 116.7(4) . . ?
C37 C36 C41 117.8(4) . . ?
C35 C36 C41 125.5(4) . . ?
C38 C37 C36 122.4(4) . . ?
C37 C38 C39 119.3(4) . . ?
C40 C39 C38 120.8(5) . . ?
C39 C40 O10 125.9(4) . . ?
C39 C40 C41 121.9(4) . . ?
O10 C40 C41 112.2(4) . . ?
O5 C41 C40 121.7(4) . . ?
O5 C41 C36 120.4(4) . . ?
C40 C41 C36 117.9(4) . . ?
N5 C43 C44 128.2(4) . . ?
C45 C44 C49 119.4(4) . . ?
C45 C44 C43 116.0(4) . . ?
C49 C44 C43 124.5(4) . . ?
C46 C45 C44 121.6(4) . . ?
C45 C46 C47 119.8(4) . . ?
C48 C47 C46 119.3(4) . . ?
C47 C48 O11 124.3(4) . . ?
C47 C48 C49 123.0(4) . . ?
O11 C48 C49 112.7(3) . . ?
O6 C49 C48 118.9(4) . . ?
O6 C49 C44 124.4(4) . . ?
C48 C49 C44 116.8(4) . . ?
N6 C51 C52 127.3(4) . . ?
C53 C52 C57 119.9(4) . . ?
C53 C52 C51 115.1(4) . . ?
C57 C52 C51 124.9(4) . . ?
C54 C53 C52 121.6(4) . . ?
C53 C54 C55 119.2(4) . . ?
C56 C55 C54 119.8(4) . . ?
C55 C56 O12 124.8(4) . . ?
C55 C56 C57 122.8(4) . . ?
O12 C56 C57 112.4(4) . . ?
O4 C57 C52 123.9(4) . . ?
O4 C57 C56 119.6(4) . . ?
C52 C57 C56 116.6(4) . . ?
C11 N1 C1 115.7(4) . . ?
C11 N1 Mn1 126.7(3) . . ?
C1 N1 Mn1 116.8(3) . . ?
C19 N2 C2 117.0(4) . . ?
C19 N2 Mn1 126.8(3) . . ?
C2 N2 Mn1 115.5(3) . . ?
C27 N3 C3 116.1(4) . . ?
C27 N3 Mn1 127.9(3) . . ?
C3 N3 Mn1 115.7(3) . . ?
C35 N4 C6 116.5(4) . . ?
C35 N4 Mn2 126.5(3) . . ?
C6 N4 Mn2 115.8(3) . . ?
C43 N5 C7 117.2(4) . . ?
C43 N5 Mn2 126.5(3) . . ?
C7 N5 Mn2 116.3(3) . . ?
C51 N6 C8 116.8(4) . . ?
C51 N6 Mn2 126.1(3) . . ?
C8 N6 Mn2 115.5(3) . . ?
O21 N10 O20 121.4(7) . . ?
O21 N10 O22 114.4(7) . . ?
O20 N10 O22 123.3(6) . . ?
C33 O1 Mn1 131.2(2) . . ?
C33 O1 Dy1 135.7(2) . . ?
Mn1 O1 Dy1 92.81(10) . . ?
C25 O2 Mn1 131.6(3) . . ?
C25 O2 Dy1 133.4(3) . . ?
Mn1 O2 Dy1 93.63(11) . . ?
C17 O3 Mn1 132.7(3) . . ?
C17 O3 Dy1 133.5(3) . . ?
Mn1 O3 Dy1 93.68(11) . . ?
C57 O4 Mn2 130.1(3) . . ?
C57 O4 Dy1 136.5(3) . . ?
Mn2 O4 Dy1 93.22(10) . . ?
C41 O5 Mn2 133.1(3) . . ?
C41 O5 Dy1 132.9(3) . . ?
Mn2 O5 Dy1 94.02(11) . . ?
C49 O6 Mn2 131.4(3) . . ?
C49 O6 Dy1 132.2(3) . . ?
Mn2 O6 Dy1 93.39(10) . . ?
C16 O7 C18 115.2(3) . . ?
C24 O8 C26 116.8(4) . . ?
C24 O8 Dy1 115.3(2) . . ?
C26 O8 Dy1 127.3(3) . . ?
C32 O9 C34 117.2(3) . . ?
C40 O10 C42 116.7(3) . . ?
C48 O11 C50 116.9(3) . . ?
C48 O11 Dy1 114.2(2) . . ?
C50 O11 Dy1 127.8(3) . . ?
C56 O12 C58 116.5(3) . . ?
O2 Mn1 O3 76.42(11) . . ?
O2 Mn1 O1 77.80(11) . . ?
O3 Mn1 O1 77.57(11) . . ?
O2 Mn1 N1 122.54(14) . . ?
O3 Mn1 N1 84.34(13) . . ?
O1 Mn1 N1 148.70(14) . . ?
O2 Mn1 N3 148.69(14) . . ?
O3 Mn1 N3 124.03(14) . . ?
O1 Mn1 N3 83.79(13) . . ?
N1 Mn1 N3 85.53(15) . . ?
O2 Mn1 N2 84.09(13) . . ?
O3 Mn1 N2 148.17(14) . . ?
O1 Mn1 N2 122.76(13) . . ?
N1 Mn1 N2 85.31(15) . . ?
N3 Mn1 N2 84.93(16) . . ?
O2 Mn1 Dy1 46.14(8) . . ?
O3 Mn1 Dy1 45.99(7) . . ?
O1 Mn1 Dy1 46.25(7) . . ?
N1 Mn1 Dy1 128.79(10) . . ?
N3 Mn1 Dy1 128.51(11) . . ?
N2 Mn1 Dy1 128.36(11) . . ?
O6 Mn2 O5 76.23(11) . . ?
O6 Mn2 O4 77.84(11) . . ?
O5 Mn2 O4 76.73(11) . . ?
O6 Mn2 N6 147.39(13) . . ?
O5 Mn2 N6 125.13(13) . . ?
O4 Mn2 N6 83.55(12) . . ?
O6 Mn2 N4 123.36(13) . . ?
O5 Mn2 N4 83.83(13) . . ?
O4 Mn2 N4 146.81(13) . . ?
N6 Mn2 N4 86.09(14) . . ?
O6 Mn2 N5 84.75(13) . . ?
O5 Mn2 N5 148.13(13) . . ?
O4 Mn2 N5 124.18(14) . . ?
N6 Mn2 N5 83.90(15) . . ?
N4 Mn2 N5 85.70(15) . . ?
O6 Mn2 Dy1 46.34(7) . . ?
O5 Mn2 Dy1 45.64(7) . . ?
O4 Mn2 Dy1 45.76(7) . . ?
N6 Mn2 Dy1 128.13(10) . . ?
N4 Mn2 Dy1 128.26(10) . . ?
N5 Mn2 Dy1 129.32(11) . . ?
O5 Dy1 O4 68.84(10) . . ?
O5 Dy1 O3 178.07(10) . . ?
O4 Dy1 O3 112.08(10) . . ?
O5 Dy1 O2 111.76(10) . . ?
O4 Dy1 O2 175.58(11) . . ?
O3 Dy1 O2 67.46(10) . . ?
O5 Dy1 O1 112.59(10) . . ?
O4 Dy1 O1 106.70(10) . . ?
O3 Dy1 O1 68.93(9) . . ?
O2 Dy1 O1 68.94(10) . . ?
O5 Dy1 O6 67.44(10) . . ?
O4 Dy1 O6 69.27(10) . . ?
O3 Dy1 O6 111.15(10) . . ?
O2 Dy1 O6 115.11(10) . . ?
O1 Dy1 O6 175.80(10) . . ?
O5 Dy1 O8 64.78(9) . . ?
O4 Dy1 O8 125.34(9) . . ?
O3 Dy1 O8 113.57(9) . . ?
O2 Dy1 O8 57.69(9) . . ?
O1 Dy1 O8 116.56(9) . . ?
O6 Dy1 O8 67.42(9) . . ?
O5 Dy1 O11 113.11(9) . . ?
O4 Dy1 O11 116.96(10) . . ?
O3 Dy1 O11 64.97(9) . . ?
O2 Dy1 O11 67.08(9) . . ?
O1 Dy1 O11 125.12(9) . . ?
O6 Dy1 O11 57.43(9) . . ?
O8 Dy1 O11 61.30(9) . . ?
O5 Dy1 Mn1 140.13(7) . . ?
O4 Dy1 Mn1 136.65(7) . . ?
O3 Dy1 Mn1 40.33(7) . . ?
O2 Dy1 Mn1 40.23(7) . . ?
O1 Dy1 Mn1 40.93(6) . . ?
O6 Dy1 Mn1 141.56(7) . . ?
O8 Dy1 Mn1 97.92(6) . . ?
O11 Dy1 Mn1 84.21(6) . . ?
O5 Dy1 Mn2 40.34(7) . . ?
O4 Dy1 Mn2 41.02(7) . . ?
O3 Dy1 Mn2 139.33(7) . . ?
O2 Dy1 Mn2 142.04(7) . . ?
O1 Dy1 Mn2 137.10(6) . . ?
O6 Dy1 Mn2 40.27(7) . . ?
O8 Dy1 Mn2 84.37(6) . . ?
O11 Dy1 Mn2 97.69(6) . . ?
Mn1 Dy1 Mn2 177.551(18) . . ?
#============================================================END
data_8
#----------------------------------------------------------------------------#
#                   CHEMICAL INFORMATION                                     #
#----------------------------------------------------------------------------#
 
_chemical_name_systematic
;
 ?
;
_chemical_formula_moiety                'C58 H60 Fe2 Gd N6 O12, Cl O4' 
_chemical_formula_sum                   'C58 H60 Cl Fe2 Gd N6 O16'
_chemical_formula_weight                1401.52
_chemical_compound_source               'synthesis as described'
_chemical_absolute_configuration        ad
 
#----------------------------------------------------------------------------#
#                   UNIT CELL INFORMATION                                    #
#----------------------------------------------------------------------------#
 
_symmetry_cell_setting                  orthorhombic
_symmetry_space_group_name_H-M          'P 21 21 21'
_symmetry_space_group_name_Hall         'P 2ac 2ab'
_symmetry_Int_Tables_number             19
loop_
    _symmetry_equiv_pos_as_xyz
'x, y, z'
'-x+1/2, -y, z+1/2'
'x+1/2, -y+1/2, -z'
'-x, y+1/2, -z+1/2'
 
_cell_length_a                          15.779(3)
_cell_length_b                          15.973(3)
_cell_length_c                          24.064(5)
_cell_angle_alpha                       90
_cell_angle_beta                        90
_cell_angle_gamma                       90
_cell_volume                            6065(2)
_cell_formula_units_Z                   4
_cell_measurement_temperature          150
_cell_measurement_reflns_used           8000
_cell_measurement_theta_min             1.65
_cell_measurement_theta_max             26.05
_cell_measurement_wavelength            0.71073
 
#----------------------------------------------------------------------------#
#                   CRYSTAL INFORMATION                                      #
#----------------------------------------------------------------------------#
 
_exptl_crystal_description              block
_exptl_crystal_colour                   red
_exptl_crystal_size_max                 0.3
_exptl_crystal_size_mid                 0.25
_exptl_crystal_size_min                 0.2
_exptl_crystal_density_diffrn           1.535
_exptl_crystal_density_method           'not measured'
_exptl_crystal_F_000                    2844
_exptl_special_details
;
 ?
;
 
#----------------------------------------------------------------------------#
#                   ABSORPTION CORRECTION                                    #
#----------------------------------------------------------------------------#
 
_exptl_absorpt_coefficient_mu           1.668
_exptl_absorpt_correction_type          refdelf
_exptl_absorpt_process_details
;
        (See: Walker, N. & Stuart, D. (1983) Acta Cryst. A39, 158-166)
;
_exptl_absorpt_correction_T_min         0.6380
_exptl_absorpt_correction_T_max         0.7145

 
#----------------------------------------------------------------------------#
#                   DATA COLLECTION                                          #
#----------------------------------------------------------------------------#
 
_diffrn_ambient_temperature             150
_diffrn_radiation_wavelength      0.71073
_diffrn_radiation_type            MoK\a
_diffrn_radiation_source          'fine-focus sealed tube'
_diffrn_radiation_monochromator   graphite
_diffrn_measurement_device        'Stoe IPDS' 
_diffrn_measurement_method        \f 
_diffrn_standards_number          200 
_diffrn_standards_interval_count  ? 
_diffrn_standards_interval_time   4 
_diffrn_standards_decay_%         0.1
_diffrn_reflns_av_R_equivalents         0.0729
_diffrn_reflns_av_unetI/netI            0.0472
_diffrn_reflns_number                   60249
_diffrn_reflns_limit_h_min              -19
_diffrn_reflns_limit_h_max              19
_diffrn_reflns_limit_k_min              -19
_diffrn_reflns_limit_k_max              19
_diffrn_reflns_limit_l_min              -29
_diffrn_reflns_limit_l_max              29
_diffrn_reflns_theta_min                2.13
_diffrn_reflns_theta_max                26.11
_diffrn_reflns_theta_full               26.11
_diffrn_measured_fraction_theta_full
                                        0.984
_diffrn_measured_fraction_theta_max
                                        0.984
_reflns_number_total                    11856
_reflns_number_gt                       10053
_reflns_threshold_expression            >2\s(I)
                                   
#----------------------------------------------------------------------------#
#                   COMPUTER PROGRAMS USED                                   #
#----------------------------------------------------------------------------#
 
_computing_data_collection              'Stoe IPDS software (Stoe, 1996)'
_computing_cell_refinement              'Stoe IPDS software (Stoe, 1996)'
_computing_data_reduction               'XRED (Stoe, 1.08, 1996)'
_computing_structure_solution           'SIR92 (Giacovazzo et al, 1993)'
_computing_structure_refinement         'SHELXL-97 (Sheldrick, 1997)'
_computing_molecular_graphics           'Ortep-3 for Windows (Farrugia, 1997)'
_computing_publication_material
                                   'WinGX publication routines (Farrugia, 1999)'
 
#----------------------------------------------------------------------------#
#                   REFINEMENT INFORMATION                                   #
#----------------------------------------------------------------------------#
 
_refine_special_details
;
 Refinement of F^2^ against ALL reflections.  The weighted R-factor wR and
 goodness of fit S are based on F^2^, conventional R-factors R are based
 on F, with F set to zero for negative F^2^. The threshold expression of
 F^2^ > 2sigma(F^2^) is used only for calculating R-factors(gt) etc. and is
 not relevant to the choice of reflections for refinement.  R-factors based
 on F^2^ are statistically about twice as large as those based on F, and R-
 factors based on ALL data will be even larger.
;
_refine_ls_structure_factor_coef        Fsqd
_refine_ls_matrix_type                  full
_refine_ls_weighting_scheme             calc
_refine_ls_weighting_details
         'calc w=1/[\s^2^(Fo^2^)+(0.0622P)^2^+0.0000P] where P=(Fo^2^+2Fc^2^)/3'
_atom_sites_solution_primary            direct
_atom_sites_solution_secondary          difmap
_atom_sites_solution_hydrogens          geom
_refine_ls_hydrogen_treatment           constr
_refine_ls_extinction_method            none
_refine_ls_number_reflns                11856
_refine_ls_number_parameters            765
_refine_ls_number_restraints            0
_refine_ls_R_factor_all                 0.0477
_refine_ls_R_factor_gt                  0.0388
_refine_ls_wR_factor_ref                0.0932
_refine_ls_wR_factor_gt                 0.0887
_refine_ls_goodness_of_fit_ref          0.994
_refine_ls_restrained_S_all             0.994
_refine_ls_shift/su_max                 0.002
_refine_ls_shift/su_mean                0
_refine_ls_abs_structure_details
                                    'Flack H D (1983), Acta Cryst. A39, 876-881'
_refine_ls_abs_structure_Flack          -0.026(8)
_refine_diff_density_max                0.825
_refine_diff_density_min                -1.143
_refine_diff_density_rms                0.098
 
#----------------------------------------------------------------------------#
#                   ATOMIC TYPES, COORDINATES AND THERMAL PARAMETERS         #
#----------------------------------------------------------------------------#
 
loop_
    _atom_type_symbol
    _atom_type_description
    _atom_type_scat_dispersion_real
    _atom_type_scat_dispersion_imag
    _atom_type_scat_source
C C 0.0033 0.0016 'International Tables Vol C Tables 4.2.6.8 and 6.1.1.4'
H H 0 0 'International Tables Vol C Tables 4.2.6.8 and 6.1.1.4'
N N 0.0061 0.0033 'International Tables Vol C Tables 4.2.6.8 and 6.1.1.4'
O O 0.0106 0.006 'International Tables Vol C Tables 4.2.6.8 and 6.1.1.4'
Fe Fe 0.3463 0.8444 'International Tables Vol C Tables 4.2.6.8 and 6.1.1.4'
Gd Gd -0.1653 3.9035 'International Tables Vol C Tables 4.2.6.8 and 6.1.1.4'
Cl Cl 0.1484 0.1585 'International Tables Vol C Tables 4.2.6.8 and 6.1.1.4'
 
loop_
    _atom_site_label
    _atom_site_type_symbol
    _atom_site_fract_x
    _atom_site_fract_y
    _atom_site_fract_z
    _atom_site_U_iso_or_equiv
    _atom_site_adp_type
    _atom_site_occupancy
    _atom_site_symmetry_multiplicity
    _atom_site_calc_flag
    _atom_site_refinement_flags
    _atom_site_disorder_assembly
    _atom_site_disorder_group
C1 C 0.2695(4) 0.8633(4) 0.9362(3) 0.0471(14) Uani 1 1 d . . .
H1A H 0.253 0.8048 0.9366 0.056 Uiso 1 1 calc R . .
H1B H 0.2356 0.8917 0.9083 0.056 Uiso 1 1 calc R . .
C2 C 0.3204(4) 0.8829(4) 1.0352(3) 0.0536(16) Uani 1 1 d . . .
H2A H 0.2972 0.8879 1.0724 0.064 Uiso 1 1 calc R . .
H2B H 0.3387 0.8254 1.0302 0.064 Uiso 1 1 calc R . .
C3 C 0.2360(4) 0.9990(4) 0.9872(3) 0.0470(14) Uani 1 1 d . . .
H3A H 0.1795 1.0082 0.9726 0.056 Uiso 1 1 calc R . .
H3B H 0.2393 1.0254 1.0235 0.056 Uiso 1 1 calc R . .
C4 C 0.2520(4) 0.9023(3) 0.9936(2) 0.0432(13) Uani 1 1 d . . .
C5 C 0.1694(5) 0.8648(4) 1.0150(3) 0.0624(19) Uani 1 1 d . . .
H5A H 0.1764 0.8056 1.0202 0.094 Uiso 1 1 calc R . .
H5B H 0.125 0.8748 0.9885 0.094 Uiso 1 1 calc R . .
H5C H 0.1548 0.8903 1.0498 0.094 Uiso 1 1 calc R . .
C6 C 0.8741(4) 1.2873(4) 0.7868(2) 0.0507(15) Uani 1 1 d . . .
H6A H 0.8965 1.343 0.7932 0.061 Uiso 1 1 calc R . .
H6B H 0.8565 1.2842 0.7482 0.061 Uiso 1 1 calc R . .
C7 C 0.9258(3) 1.1399(4) 0.7665(2) 0.0460(14) Uani 1 1 d . . .
H7A H 0.9399 1.1461 0.7275 0.055 Uiso 1 1 calc R . .
H7B H 0.9615 1.0961 0.7818 0.055 Uiso 1 1 calc R . .
C8 C 0.9593(4) 1.2081(4) 0.8588(2) 0.0493(15) Uani 1 1 d . . .
H8A H 1.0167 1.1878 0.8644 0.059 Uiso 1 1 calc R . .
H8B H 0.9539 1.2609 0.8784 0.059 Uiso 1 1 calc R . .
C9 C 0.9448(4) 1.2228(4) 0.7969(2) 0.0466(14) Uani 1 1 d . . .
C10 C 1.0272(4) 1.2573(5) 0.7723(3) 0.0608(19) Uani 1 1 d . . .
H10A H 1.0478 1.302 0.7952 0.091 Uiso 1 1 calc R . .
H10B H 1.0166 1.2779 0.7354 0.091 Uiso 1 1 calc R . .
H10C H 1.0688 1.2135 0.7707 0.091 Uiso 1 1 calc R . .
C11 C 0.2660(4) 1.0930(3) 0.9166(2) 0.0404(13) Uani 1 1 d . . .
H11 H 0.2076 1.1005 0.918 0.049 Uiso 1 1 calc R . .
C12 C 0.3120(3) 1.1435(3) 0.87795(19) 0.0335(11) Uani 1 1 d . . .
C13 C 0.2632(3) 1.2064(3) 0.8508(2) 0.0351(11) Uani 1 1 d . . .
H13 H 0.2051 1.2092 0.857 0.042 Uiso 1 1 calc R . .
C14 C 0.3007(4) 1.2625(3) 0.8156(2) 0.0418(13) Uani 1 1 d . . .
H14 H 0.2684 1.3036 0.7982 0.05 Uiso 1 1 calc R . .
C15 C 0.3883(4) 1.2578(3) 0.8061(2) 0.0380(12) Uani 1 1 d . . .
H15 H 0.4144 1.2965 0.7829 0.046 Uiso 1 1 calc R . .
C16 C 0.4353(3) 1.1963(3) 0.8310(2) 0.0335(11) Uani 1 1 d . . .
C17 C 0.3997(3) 1.1384(3) 0.86771(17) 0.0297(10) Uani 1 1 d . . .
C18 C 0.5614(4) 1.2398(3) 0.78335(19) 0.0375(12) Uani 1 1 d . . .
H18A H 0.5349 1.232 0.7478 0.056 Uiso 1 1 calc R . .
H18B H 0.6204 1.2258 0.7807 0.056 Uiso 1 1 calc R . .
H18C H 0.5556 1.2972 0.7945 0.056 Uiso 1 1 calc R . .
C19 C 0.4258(4) 0.9687(4) 1.0759(2) 0.0473(15) Uani 1 1 d . . .
H19 H 0.3957 0.9563 1.1081 0.057 Uiso 1 1 calc R . .
C20 C 0.5020(4) 1.0189(4) 1.0829(2) 0.0420(13) Uani 1 1 d . . .
C21 C 0.5321(4) 1.0299(3) 1.1374(2) 0.0451(14) Uani 1 1 d . . .
H21 H 0.5 1.0101 1.167 0.054 Uiso 1 1 calc R . .
C22 C 0.6072(4) 1.0690(3) 1.14757(19) 0.0469(13) Uani 1 1 d . . .
H22 H 0.6267 1.0737 1.1839 0.056 Uiso 1 1 calc R . .
C23 C 0.6553(4) 1.1020(3) 1.1039(2) 0.0428(13) Uani 1 1 d . . .
H23 H 0.7067 1.1287 1.1106 0.051 Uiso 1 1 calc R . .
C24 C 0.6242(4) 1.0939(3) 1.0503(2) 0.0379(12) Uani 1 1 d . . .
C25 C 0.5485(3) 1.0534(3) 1.03743(18) 0.0312(11) Uani 1 1 d . . .
C26 C 0.7413(4) 1.1729(4) 1.0129(2) 0.0469(14) Uani 1 1 d . . .
H26A H 0.7281 1.2212 1.0351 0.07 Uiso 1 1 calc R . .
H26B H 0.7641 1.1906 0.9778 0.07 Uiso 1 1 calc R . .
H26C H 0.7824 1.1391 1.032 0.07 Uiso 1 1 calc R . .
C28 C 0.4823(4) 0.7927(3) 0.8852(2) 0.0391(12) Uani 1 1 d . . .
C27 C 0.3953(3) 0.8029(3) 0.9030(2) 0.0395(11) Uani 1 1 d . . .
H27 H 0.361 0.7557 0.901 0.047 Uiso 1 1 calc R . .
C29 C 0.5054(4) 0.7119(3) 0.8650(2) 0.0419(13) Uani 1 1 d . . .
H29 H 0.4665 0.6682 0.8668 0.05 Uiso 1 1 calc R . .
C30 C 0.5840(4) 0.6978(3) 0.8431(2) 0.0424(13) Uani 1 1 d . . .
H30 H 0.599 0.6445 0.8309 0.051 Uiso 1 1 calc R . .
C31 C 0.6416(4) 0.7639(3) 0.8392(2) 0.0378(12) Uani 1 1 d . . .
H31 H 0.6947 0.7546 0.8235 0.045 Uiso 1 1 calc R . .
C32 C 0.6209(3) 0.8427(3) 0.85818(19) 0.0341(11) Uani 1 1 d . . .
C33 C 0.5415(3) 0.8588(3) 0.88278(18) 0.0309(11) Uani 1 1 d . . .
C34 C 0.7536(4) 0.9010(4) 0.8289(2) 0.0439(14) Uani 1 1 d . . .
H34A H 0.7867 0.8619 0.85 0.066 Uiso 1 1 calc R . .
H34B H 0.7823 0.954 0.8276 0.066 Uiso 1 1 calc R . .
H34C H 0.746 0.8802 0.7918 0.066 Uiso 1 1 calc R . .
C35 C 0.9330(3) 1.0881(4) 0.9133(2) 0.0396(13) Uani 1 1 d . . .
H35 H 0.9916 1.0884 0.917 0.048 Uiso 1 1 calc R . .
C36 C 0.8873(3) 1.0224(3) 0.94182(19) 0.0377(12) Uani 1 1 d . . .
C37 C 0.9382(4) 0.9690(4) 0.9747(2) 0.0494(15) Uani 1 1 d . . .
H37 H 0.9968 0.976 0.9747 0.059 Uiso 1 1 calc R . .
C38 C 0.9026(5) 0.9070(4) 1.0066(2) 0.0558(16) Uani 1 1 d . . .
H38 H 0.9369 0.8712 1.0272 0.067 Uiso 1 1 calc R . .
C39 C 0.8157(4) 0.8979(4) 1.0082(2) 0.0461(14) Uani 1 1 d . . .
H39 H 0.7914 0.8579 1.0313 0.055 Uiso 1 1 calc R . .
C41 C 0.8000(3) 1.0108(3) 0.94079(19) 0.0357(12) Uani 1 1 d . . .
C42 C 0.6384(4) 0.8829(3) 1.0071(2) 0.0445(14) Uani 1 1 d . . .
H42A H 0.6606 0.8287 0.9979 0.067 Uiso 1 1 calc R . .
H42B H 0.5784 0.8837 1.0003 0.067 Uiso 1 1 calc R . .
H42C H 0.6489 0.8944 1.0457 0.067 Uiso 1 1 calc R . .
C43 C 0.8000(4) 1.0957(3) 0.7250(2) 0.0397(13) Uani 1 1 d . . .
H43 H 0.832 1.1029 0.6929 0.048 Uiso 1 1 calc R . .
C44 C 0.7143(3) 1.0647(4) 0.71765(18) 0.0341(10) Uani 1 1 d . . .
C45 C 0.6917(4) 1.0388(3) 0.6636(2) 0.0388(12) Uani 1 1 d . . .
H45 H 0.7303 1.0459 0.6349 0.047 Uiso 1 1 calc R . .
C46 C 0.6147(3) 1.0035(3) 0.6523(2) 0.0393(12) Uani 1 1 d . . .
H46 H 0.6007 0.9877 0.6162 0.047 Uiso 1 1 calc R . .
C47 C 0.5567(3) 0.9916(3) 0.6965(2) 0.0353(11) Uani 1 1 d . . .
H47 H 0.5044 0.9668 0.6898 0.042 Uiso 1 1 calc R . .
C48 C 0.5777(3) 1.0167(3) 0.74896(19) 0.0305(11) Uani 1 1 d . . .
C49 C 0.6559(3) 1.0544(3) 0.76157(17) 0.0293(10) Uani 1 1 d . . .
C50 C 0.4446(4) 0.9733(4) 0.7841(2) 0.0414(12) Uani 1 1 d . . .
H50A H 0.4152 1.0079 0.7578 0.062 Uiso 1 1 calc R . .
H50B H 0.4133 0.9715 0.8183 0.062 Uiso 1 1 calc R . .
H50C H 0.4501 0.9177 0.7694 0.062 Uiso 1 1 calc R . .
C51 C 0.7638(4) 1.3410(3) 0.8405(2) 0.0402(13) Uani 1 1 d . . .
H51 H 0.7893 1.3915 0.8308 0.048 Uiso 1 1 calc R . .
C52 C 0.6878(3) 1.3466(3) 0.8744(2) 0.0364(11) Uani 1 1 d . . .
C53 C 0.6543(3) 1.4280(3) 0.8830(2) 0.0381(11) Uani 1 1 d . . .
H53 H 0.6831 1.474 0.8688 0.046 Uiso 1 1 calc R . .
C54 C 0.5811(3) 1.4402(3) 0.9115(2) 0.0388(12) Uani 1 1 d . . .
H54 H 0.5593 1.494 0.9153 0.047 Uiso 1 1 calc R . .
C55 C 0.5380(3) 1.3717(3) 0.9354(2) 0.0354(11) Uani 1 1 d . . .
H55 H 0.489 1.3799 0.9561 0.042 Uiso 1 1 calc R . .
C56 C 0.5710(3) 1.2908(3) 0.92720(19) 0.0323(11) Uani 1 1 d . . .
C57 C 0.6459(3) 1.2768(3) 0.8979(2) 0.0314(10) Uani 1 1 d . . .
C58 C 0.4567(4) 1.2309(3) 0.9793(2) 0.0404(13) Uani 1 1 d . . .
H58A H 0.4698 1.2621 1.0122 0.061 Uiso 1 1 calc R . .
H58B H 0.4344 1.1771 0.9894 0.061 Uiso 1 1 calc R . .
H58C H 0.4153 1.2608 0.9578 0.061 Uiso 1 1 calc R . .
N1 N 0.2983(3) 1.0376(3) 0.94999(18) 0.0387(10) Uani 1 1 d . . .
N2 N 0.3950(3) 0.9393(3) 1.02998(17) 0.0441(10) Uani 1 1 d . . .
N3 N 0.3603(3) 0.8700(3) 0.92123(19) 0.0432(11) Uani 1 1 d . . .
N4 N 0.8992(3) 1.1473(3) 0.88277(16) 0.0411(10) Uani 1 1 d . . .
N5 N 0.8369(3) 1.1145(3) 0.77145(16) 0.0364(10) Uani 1 1 d . . .
N6 N 0.7997(3) 1.2744(3) 0.82272(18) 0.0384(10) Uani 1 1 d . . .
O1 O 0.4489(2) 1.08126(19) 0.89167(13) 0.0307(7) Uani 1 1 d . . .
O2 O 0.5244(2) 1.04560(19) 0.98508(12) 0.0309(7) Uani 1 1 d . . .
O3 O 0.52667(19) 0.9349(2) 0.90288(13) 0.0313(6) Uani 1 1 d . . .
O4 O 0.7485(2) 1.0560(2) 0.90898(12) 0.0330(7) Uani 1 1 d . . .
O5 O 0.6710(2) 1.0800(2) 0.81281(12) 0.0323(7) Uani 1 1 d . . .
O6 O 0.6720(2) 1.19833(19) 0.89136(13) 0.0324(7) Uani 1 1 d . . .
O7 O 0.5212(2) 1.1865(2) 0.82384(14) 0.0352(8) Uani 1 1 d . . .
O8 O 0.6659(2) 1.1250(2) 1.00382(14) 0.0381(8) Uani 1 1 d . . .
O9 O 0.6734(2) 0.9114(2) 0.85446(15) 0.0378(8) Uani 1 1 d . . .
O10 O 0.6787(2) 0.9452(2) 0.97368(14) 0.0385(8) Uani 1 1 d . . .
O11 O 0.5255(2) 1.0067(2) 0.79396(13) 0.0356(8) Uani 1 1 d . . .
O12 O 0.5327(2) 1.2198(2) 0.94673(14) 0.0341(7) Uani 1 1 d . . .
O30 O 0.0876(5) 0.9338(5) 0.8739(4) 0.143(3) Uani 1 1 d . . .
O31 O 0.1856(5) 0.9500(8) 0.8036(4) 0.169(5) Uani 1 1 d . . .
O32 O 0.1058(4) 1.0597(4) 0.8342(2) 0.0839(15) Uani 1 1 d . . .
O33 O 0.0445(6) 0.9612(5) 0.7793(4) 0.151(4) Uani 1 1 d . . .
Fe1 Fe 0.42261(4) 0.98356(4) 0.94761(3) 0.03068(16) Uani 1 1 d . . .
Fe2 Fe 0.77422(5) 1.14643(4) 0.84735(3) 0.03112(16) Uani 1 1 d . . .
Gd1 Gd 0.598714(15) 1.067092(14) 0.899120(9) 0.03007(7) Uani 1 1 d . . .
Cl1 Cl 0.10449(15) 0.97470(14) 0.82194(9) 0.0833(6) Uani 1 1 d . . .
C40 C 0.7635(4) 0.9489(3) 0.97479(19) 0.0360(12) Uani 1 1 d . . .
 
loop_
    _atom_site_aniso_label
    _atom_site_aniso_U_11
    _atom_site_aniso_U_22
    _atom_site_aniso_U_33
    _atom_site_aniso_U_23
    _atom_site_aniso_U_13
    _atom_site_aniso_U_12
C1 0.037(3) 0.036(3) 0.069(4) -0.004(3) 0.009(3) -0.008(2)
C2 0.067(5) 0.037(3) 0.056(4) 0.007(3) 0.017(3) -0.014(3)
C3 0.043(3) 0.042(3) 0.056(3) 0.006(3) 0.017(3) -0.006(2)
C4 0.040(3) 0.036(3) 0.053(3) -0.002(2) 0.017(3) -0.004(2)
C5 0.061(4) 0.040(3) 0.086(5) -0.003(3) 0.031(4) -0.002(3)
C6 0.058(4) 0.050(3) 0.044(3) 0.006(3) 0.012(3) -0.022(3)
C7 0.024(3) 0.071(4) 0.043(3) -0.019(3) 0.006(2) -0.008(3)
C8 0.035(3) 0.064(4) 0.049(3) -0.014(3) 0.003(2) -0.022(3)
C9 0.047(4) 0.052(3) 0.041(3) -0.009(3) 0.013(3) -0.022(3)
C10 0.050(4) 0.082(5) 0.051(4) -0.015(3) 0.010(3) -0.031(4)
C11 0.023(3) 0.048(3) 0.050(3) -0.008(2) 0.000(2) -0.002(2)
C12 0.041(3) 0.030(2) 0.029(2) -0.0071(19) -0.001(2) -0.006(2)
C13 0.029(3) 0.042(3) 0.034(2) -0.007(2) -0.005(2) 0.007(2)
C14 0.042(3) 0.042(3) 0.041(3) 0.001(2) -0.005(2) 0.011(2)
C15 0.046(4) 0.038(3) 0.030(2) 0.008(2) -0.002(2) 0.000(2)
C16 0.032(3) 0.034(3) 0.035(2) -0.005(2) -0.003(2) 0.000(2)
C17 0.032(3) 0.027(2) 0.030(2) -0.0067(17) -0.010(2) 0.007(2)
C18 0.047(3) 0.038(3) 0.028(2) 0.012(2) -0.004(2) -0.008(2)
C19 0.063(4) 0.046(3) 0.033(3) 0.010(2) 0.015(3) 0.000(3)
C20 0.048(4) 0.039(3) 0.039(3) 0.005(2) 0.006(2) 0.006(2)
C21 0.067(4) 0.036(3) 0.032(3) 0.009(2) 0.011(3) 0.009(3)
C22 0.073(4) 0.039(3) 0.028(2) 0.001(2) -0.001(3) 0.008(3)
C23 0.059(4) 0.037(3) 0.032(3) -0.011(2) -0.015(3) 0.007(2)
C24 0.046(4) 0.029(3) 0.039(3) -0.003(2) 0.007(2) 0.005(2)
C25 0.039(3) 0.027(3) 0.028(2) 0.0016(18) 0.0015(19) 0.004(2)
C26 0.048(4) 0.047(3) 0.046(3) -0.012(2) -0.004(3) -0.015(3)
C28 0.055(4) 0.027(2) 0.035(3) 0.000(2) 0.006(2) 0.004(2)
C27 0.038(3) 0.030(2) 0.050(3) -0.002(2) -0.001(3) -0.007(2)
C29 0.057(4) 0.029(3) 0.040(3) 0.002(2) 0.006(2) 0.000(2)
C30 0.053(4) 0.031(2) 0.043(3) -0.004(2) 0.004(3) 0.006(2)
C31 0.034(3) 0.042(3) 0.037(3) -0.002(2) -0.003(2) 0.007(2)
C32 0.035(3) 0.041(3) 0.027(2) -0.001(2) 0.0005(19) -0.001(2)
C33 0.034(3) 0.032(3) 0.027(2) 0.0001(18) 0.0032(18) 0.001(2)
C34 0.039(3) 0.049(3) 0.043(3) -0.011(2) 0.008(2) 0.006(2)
C35 0.028(3) 0.056(4) 0.035(3) -0.016(2) 0.001(2) 0.001(2)
C36 0.037(3) 0.047(3) 0.029(2) -0.008(2) -0.005(2) 0.009(2)
C37 0.038(3) 0.064(4) 0.045(3) -0.011(3) -0.007(3) 0.015(3)
C38 0.060(4) 0.067(4) 0.041(3) 0.003(3) -0.006(3) 0.028(3)
C39 0.048(4) 0.055(3) 0.035(3) 0.003(2) -0.004(2) 0.011(3)
C41 0.043(3) 0.039(3) 0.025(2) -0.009(2) -0.006(2) 0.014(2)
C42 0.058(4) 0.034(3) 0.042(3) 0.006(2) 0.007(3) 0.000(2)
C43 0.040(3) 0.051(3) 0.028(2) -0.001(2) 0.008(2) -0.003(2)
C44 0.032(3) 0.038(2) 0.032(2) -0.004(2) -0.0035(19) -0.002(2)
C45 0.039(3) 0.044(3) 0.033(3) -0.007(2) 0.002(2) 0.005(2)
C46 0.041(3) 0.043(3) 0.033(2) -0.004(2) -0.001(2) 0.001(2)
C47 0.031(3) 0.034(3) 0.041(3) -0.003(2) -0.006(2) -0.006(2)
C48 0.034(3) 0.025(2) 0.032(2) 0.0002(18) 0.004(2) 0.000(2)
C49 0.034(3) 0.032(3) 0.022(2) -0.0064(19) -0.0023(17) 0.001(2)
C50 0.035(3) 0.043(3) 0.047(3) -0.011(2) -0.002(2) -0.011(2)
C51 0.054(4) 0.027(3) 0.040(3) 0.003(2) -0.001(2) -0.018(2)
C52 0.040(3) 0.032(3) 0.037(2) 0.000(2) -0.009(2) -0.006(2)
C53 0.046(3) 0.030(2) 0.038(3) 0.004(2) -0.009(2) -0.004(2)
C54 0.037(3) 0.030(2) 0.049(3) -0.002(2) -0.011(2) 0.000(2)
C55 0.034(3) 0.030(3) 0.042(3) -0.006(2) -0.012(2) 0.002(2)
C56 0.034(3) 0.033(3) 0.030(2) -0.0009(19) -0.009(2) 0.000(2)
C57 0.041(3) 0.028(2) 0.025(2) -0.002(2) -0.005(2) 0.0003(19)
C58 0.043(3) 0.035(3) 0.043(3) -0.003(2) 0.018(2) 0.005(2)
N1 0.044(3) 0.031(2) 0.042(2) -0.0045(18) 0.011(2) -0.0005(18)
N2 0.053(3) 0.037(2) 0.042(2) 0.0065(19) 0.011(2) -0.001(2)
N3 0.042(3) 0.039(3) 0.048(2) -0.002(2) 0.004(2) -0.004(2)
N4 0.036(2) 0.056(3) 0.031(2) -0.0102(18) 0.0014(19) -0.014(2)
N5 0.040(3) 0.042(2) 0.027(2) -0.0078(17) 0.0024(18) -0.004(2)
N6 0.041(3) 0.037(2) 0.037(2) -0.0004(18) 0.0074(19) -0.013(2)
O1 0.0332(18) 0.0265(17) 0.0324(16) 0.0036(14) 0.0012(14) -0.0009(13)
O2 0.0342(19) 0.0321(18) 0.0265(16) -0.0012(12) 0.0016(13) -0.0006(13)
O3 0.0318(17) 0.0271(15) 0.0350(15) -0.0015(17) 0.0092(14) 0.0007(14)
O4 0.0341(19) 0.0354(18) 0.0295(17) -0.0025(14) -0.0034(13) 0.0016(14)
O5 0.0289(18) 0.040(2) 0.0281(16) -0.0054(14) 0.0016(13) -0.0057(15)
O6 0.0357(19) 0.0295(16) 0.0320(17) -0.0016(14) 0.0048(14) -0.0003(14)
O7 0.036(2) 0.0337(18) 0.0359(18) 0.0044(14) 0.0029(15) -0.0058(15)
O8 0.042(2) 0.0356(19) 0.0370(18) -0.0022(15) -0.0004(16) -0.0034(15)
O9 0.034(2) 0.039(2) 0.0406(18) -0.0057(15) 0.0035(15) -0.0011(15)
O10 0.038(2) 0.038(2) 0.0387(18) 0.0064(16) 0.0002(15) 0.0042(16)
O11 0.036(2) 0.042(2) 0.0279(17) -0.0036(15) 0.0035(15) -0.0053(16)
O12 0.037(2) 0.0262(17) 0.0393(18) -0.0014(14) 0.0069(15) -0.0019(14)
O30 0.099(5) 0.125(6) 0.206(8) 0.086(6) 0.053(5) 0.024(5)
O31 0.107(6) 0.269(13) 0.132(6) -0.085(7) -0.016(5) 0.086(7)
O32 0.076(4) 0.072(3) 0.104(4) -0.015(3) -0.020(3) -0.015(3)
O33 0.134(7) 0.136(7) 0.183(8) -0.099(6) -0.074(6) 0.048(5)
Fe1 0.0332(4) 0.0246(3) 0.0342(3) -0.0001(3) 0.0070(3) -0.0012(3)
Fe2 0.0306(4) 0.0338(4) 0.0289(3) -0.0040(3) 0.0027(3) -0.0041(3)
Gd1 0.02966(12) 0.02886(11) 0.03169(11) 0.00016(10) 0.00307(10) -0.00226(10)
Cl1 0.0680(13) 0.0896(13) 0.0922(13) -0.0220(11) -0.0116(11) 0.0153(11)
C40 0.043(3) 0.036(3) 0.029(2) -0.008(2) 0.004(2) 0.006(2)
 
 
#----------------------------------------------------------------------------#
#                   MOLECULAR GEOMETRY                                       #
#----------------------------------------------------------------------------#
 
_geom_special_details
;
 All esds (except the esd in the dihedral angle between two l.s. planes)
 are estimated using the full covariance matrix.  The cell esds are taken
 into account individually in the estimation of esds in distances, angles
 and torsion angles; correlations between esds in cell parameters are only
 used when they are defined by crystal symmetry.  An approximate (isotropic)
 treatment of cell esds is used for estimating esds involving l.s. planes.
;
loop_
    _geom_bond_atom_site_label_1
    _geom_bond_atom_site_label_2
    _geom_bond_distance
    _geom_bond_site_symmetry_2
    _geom_bond_publ_flag
C1 N3 1.481(8) . ?
C1 C4 1.540(8) . ?
C2 N2 1.488(8) . ?
C2 C4 1.506(9) . ?
C3 N1 1.466(7) . ?
C3 C4 1.572(8) . ?
C4 C5 1.524(9) . ?
C6 N6 1.474(7) . ?
C6 C9 1.538(10) . ?
C7 N5 1.465(7) . ?
C7 C9 1.543(8) . ?
C8 N4 1.475(7) . ?
C8 C9 1.525(8) . ?
C9 C10 1.531(8) . ?
C11 N1 1.299(7) . ?
C11 C12 1.429(8) . ?
C12 C17 1.408(8) . ?
C12 C13 1.424(7) . ?
C13 C14 1.367(8) . ?
C14 C15 1.403(8) . ?
C15 C16 1.368(7) . ?
C16 O7 1.374(6) . ?
C16 C17 1.397(7) . ?
C17 O1 1.330(5) . ?
C18 O7 1.441(6) . ?
C19 N2 1.295(8) . ?
C19 C20 1.455(9) . ?
C20 C21 1.405(8) . ?
C20 C25 1.427(7) . ?
C21 C22 1.362(9) . ?
C22 C23 1.400(8) . ?
C23 C24 1.386(8) . ?
C24 O8 1.389(6) . ?
C24 C25 1.394(8) . ?
C25 O2 1.321(6) . ?
C26 O8 1.432(7) . ?
C28 C33 1.411(8) . ?
C28 C29 1.427(7) . ?
C28 C27 1.447(8) . ?
C27 N3 1.283(7) . ?
C29 C30 1.367(8) . ?
C30 C31 1.397(8) . ?
C31 C32 1.379(7) . ?
C32 O9 1.378(6) . ?
C32 C33 1.410(7) . ?
C33 O3 1.328(6) . ?
C34 O9 1.416(7) . ?
C35 N4 1.311(7) . ?
C35 C36 1.446(8) . ?
C36 C41 1.389(8) . ?
C36 C37 1.414(8) . ?
C37 C38 1.375(9) . ?
C38 C39 1.380(10) . ?
C39 C40 1.409(8) . ?
C41 O4 1.330(6) . ?
C41 C40 1.407(8) . ?
C42 O10 1.429(6) . ?
C43 N5 1.294(7) . ?
C43 C44 1.451(8) . ?
C44 C45 1.410(7) . ?
C44 C49 1.412(7) . ?
C45 C46 1.367(8) . ?
C46 C47 1.415(8) . ?
C47 C48 1.366(7) . ?
C48 O11 1.370(6) . ?
C48 C49 1.407(7) . ?
C49 O5 1.321(5) . ?
C50 O11 1.403(6) . ?
C51 N6 1.279(7) . ?
C51 C52 1.453(8) . ?
C52 C57 1.414(7) . ?
C52 C53 1.418(8) . ?
C53 C54 1.356(8) . ?
C54 C55 1.411(7) . ?
C55 C56 1.407(7) . ?
C56 O12 1.368(6) . ?
C56 C57 1.395(7) . ?
C57 O6 1.328(6) . ?
C58 O12 1.442(6) . ?
N1 Fe1 2.145(5) . ?
N2 Fe1 2.149(4) . ?
N3 Fe1 2.159(5) . ?
N4 Fe2 2.148(5) . ?
N5 Fe2 2.139(4) . ?
N6 Fe2 2.166(4) . ?
O1 Fe1 2.102(3) . ?
O1 Gd1 2.382(3) . ?
O2 Fe1 2.092(3) . ?
O2 Gd1 2.402(3) . ?
O3 Fe1 2.112(3) . ?
O3 Gd1 2.400(3) . ?
O4 Fe2 2.110(3) . ?
O4 Gd1 2.382(3) . ?
O5 Fe2 2.114(3) . ?
O5 Gd1 2.378(3) . ?
O6 Fe2 2.100(3) . ?
O6 Gd1 2.402(3) . ?
O7 Gd1 2.901(3) . ?
O8 Gd1 2.886(3) . ?
O10 C40 1.340(7) . ?
O10 Gd1 2.934(3) . ?
O11 Gd1 2.945(3) . ?
O12 Gd1 2.890(3) . ?
O30 Cl1 1.435(8) . ?
O31 Cl1 1.410(8) . ?
O32 Cl1 1.389(6) . ?
O33 Cl1 1.412(7) . ?
Fe1 Gd1 3.2960(9) . ?
Fe2 Gd1 3.2905(9) . ?
 
loop_
    _geom_angle_atom_site_label_1
    _geom_angle_atom_site_label_2
    _geom_angle_atom_site_label_3
    _geom_angle
    _geom_angle_site_symmetry_1
    _geom_angle_site_symmetry_3
    _geom_angle_publ_flag
N3 C1 C4 111.2(5) . . ?
N2 C2 C4 112.7(5) . . ?
N1 C3 C4 111.4(5) . . ?
C2 C4 C5 107.8(5) . . ?
C2 C4 C1 112.6(5) . . ?
C5 C4 C1 107.3(5) . . ?
C2 C4 C3 112.5(5) . . ?
C5 C4 C3 106.4(5) . . ?
C1 C4 C3 109.8(5) . . ?
N6 C6 C9 113.0(5) . . ?
N5 C7 C9 112.7(4) . . ?
N4 C8 C9 112.7(4) . . ?
C8 C9 C10 107.8(5) . . ?
C8 C9 C6 111.6(5) . . ?
C10 C9 C6 108.2(5) . . ?
C8 C9 C7 111.1(5) . . ?
C10 C9 C7 106.9(5) . . ?
C6 C9 C7 111.0(5) . . ?
N1 C11 C12 126.0(5) . . ?
C17 C12 C13 119.4(5) . . ?
C17 C12 C11 125.5(5) . . ?
C13 C12 C11 115.0(5) . . ?
C14 C13 C12 120.8(5) . . ?
C13 C14 C15 119.5(5) . . ?
C16 C15 C14 120.1(5) . . ?
C15 C16 O7 124.2(5) . . ?
C15 C16 C17 122.2(5) . . ?
O7 C16 C17 113.6(4) . . ?
O1 C17 C16 119.6(5) . . ?
O1 C17 C12 122.5(4) . . ?
C16 C17 C12 117.9(4) . . ?
N2 C19 C20 127.5(5) . . ?
C21 C20 C25 119.5(5) . . ?
C21 C20 C19 117.1(5) . . ?
C25 C20 C19 123.3(5) . . ?
C22 C21 C20 121.3(5) . . ?
C21 C22 C23 120.6(5) . . ?
C24 C23 C22 118.1(5) . . ?
C23 C24 O8 123.2(5) . . ?
C23 C24 C25 123.6(5) . . ?
O8 C24 C25 113.2(4) . . ?
O2 C25 C24 120.1(4) . . ?
O2 C25 C20 123.2(5) . . ?
C24 C25 C20 116.7(4) . . ?
C33 C28 C29 119.6(5) . . ?
C33 C28 C27 123.8(5) . . ?
C29 C28 C27 116.4(5) . . ?
N3 C27 C28 127.1(5) . . ?
C30 C29 C28 120.8(5) . . ?
C29 C30 C31 119.5(5) . . ?
C32 C31 C30 120.9(5) . . ?
O9 C32 C31 124.3(5) . . ?
O9 C32 C33 114.6(4) . . ?
C31 C32 C33 121.1(5) . . ?
O3 C33 C32 118.5(4) . . ?
O3 C33 C28 123.5(4) . . ?
C32 C33 C28 118.0(4) . . ?
N4 C35 C36 125.9(5) . . ?
C41 C36 C37 119.6(5) . . ?
C41 C36 C35 125.6(5) . . ?
C37 C36 C35 114.8(5) . . ?
C38 C37 C36 120.9(6) . . ?
C37 C38 C39 119.8(5) . . ?
C38 C39 C40 120.3(6) . . ?
O4 C41 C36 123.0(5) . . ?
O4 C41 C40 117.7(5) . . ?
C36 C41 C40 119.3(5) . . ?
N5 C43 C44 127.1(5) . . ?
C45 C44 C49 119.3(5) . . ?
C45 C44 C43 116.7(4) . . ?
C49 C44 C43 123.8(4) . . ?
C46 C45 C44 122.1(5) . . ?
C45 C46 C47 118.6(5) . . ?
C48 C47 C46 120.0(5) . . ?
C47 C48 O11 123.5(4) . . ?
C47 C48 C49 122.5(4) . . ?
O11 C48 C49 114.0(4) . . ?
O5 C49 C48 119.5(4) . . ?
O5 C49 C44 123.0(4) . . ?
C48 C49 C44 117.5(4) . . ?
N6 C51 C52 127.2(5) . . ?
C57 C52 C53 119.4(5) . . ?
C57 C52 C51 124.2(5) . . ?
C53 C52 C51 116.5(5) . . ?
C54 C53 C52 121.6(5) . . ?
C53 C54 C55 120.3(5) . . ?
C56 C55 C54 118.5(5) . . ?
O12 C56 C57 114.5(4) . . ?
O12 C56 C55 123.4(5) . . ?
C57 C56 C55 122.1(5) . . ?
O6 C57 C56 118.3(4) . . ?
O6 C57 C52 123.5(5) . . ?
C56 C57 C52 118.1(4) . . ?
C11 N1 C3 113.7(5) . . ?
C11 N1 Fe1 128.1(4) . . ?
C3 N1 Fe1 117.4(4) . . ?
C19 N2 C2 116.4(5) . . ?
C19 N2 Fe1 126.3(4) . . ?
C2 N2 Fe1 116.0(4) . . ?
C27 N3 C1 116.1(5) . . ?
C27 N3 Fe1 127.3(4) . . ?
C1 N3 Fe1 115.5(3) . . ?
C35 N4 C8 115.6(5) . . ?
C35 N4 Fe2 126.2(4) . . ?
C8 N4 Fe2 116.1(4) . . ?
C43 N5 C7 115.1(4) . . ?
C43 N5 Fe2 125.8(4) . . ?
C7 N5 Fe2 116.5(3) . . ?
C51 N6 C6 115.6(5) . . ?
C51 N6 Fe2 127.7(4) . . ?
C6 N6 Fe2 116.2(4) . . ?
C17 O1 Fe1 132.2(3) . . ?
C17 O1 Gd1 132.6(3) . . ?
Fe1 O1 Gd1 94.42(12) . . ?
C25 O2 Fe1 132.5(3) . . ?
C25 O2 Gd1 131.9(3) . . ?
Fe1 O2 Gd1 94.09(11) . . ?
C33 O3 Fe1 131.3(3) . . ?
C33 O3 Gd1 135.0(3) . . ?
Fe1 O3 Gd1 93.64(12) . . ?
C41 O4 Fe2 131.2(3) . . ?
C41 O4 Gd1 134.8(3) . . ?
Fe2 O4 Gd1 94.01(12) . . ?
C49 O5 Fe2 131.4(3) . . ?
C49 O5 Gd1 134.6(3) . . ?
Fe2 O5 Gd1 93.99(11) . . ?
C57 O6 Fe2 132.1(3) . . ?
C57 O6 Gd1 131.6(3) . . ?
Fe2 O6 Gd1 93.70(12) . . ?
C16 O7 C18 116.8(4) . . ?
C16 O7 Gd1 114.4(3) . . ?
C18 O7 Gd1 128.7(3) . . ?
C24 O8 C26 117.5(4) . . ?
C24 O8 Gd1 114.5(3) . . ?
C26 O8 Gd1 127.6(3) . . ?
C32 O9 C34 118.2(4) . . ?
C40 O10 C42 117.7(4) . . ?
C40 O10 Gd1 114.4(3) . . ?
C42 O10 Gd1 128.0(3) . . ?
C48 O11 C50 117.2(4) . . ?
C48 O11 Gd1 113.9(3) . . ?
C50 O11 Gd1 128.9(3) . . ?
C56 O12 C58 116.9(4) . . ?
C56 O12 Gd1 113.8(3) . . ?
C58 O12 Gd1 128.2(3) . . ?
O2 Fe1 O1 76.87(13) . . ?
O2 Fe1 O3 78.28(13) . . ?
O1 Fe1 O3 78.10(12) . . ?
O2 Fe1 N1 120.02(15) . . ?
O1 Fe1 N1 84.17(15) . . ?
O3 Fe1 N1 150.85(15) . . ?
O2 Fe1 N2 85.07(16) . . ?
O1 Fe1 N2 151.01(15) . . ?
O3 Fe1 N2 120.45(16) . . ?
N1 Fe1 N2 85.54(18) . . ?
O2 Fe1 N3 151.01(16) . . ?
O1 Fe1 N3 121.69(16) . . ?
O3 Fe1 N3 83.97(16) . . ?
N1 Fe1 N3 85.95(18) . . ?
N2 Fe1 N3 84.40(18) . . ?
O2 Fe1 Gd1 46.63(9) . . ?
O1 Fe1 Gd1 46.10(9) . . ?
O3 Fe1 Gd1 46.62(9) . . ?
N1 Fe1 Gd1 128.15(12) . . ?
N2 Fe1 Gd1 129.10(14) . . ?
N3 Fe1 Gd1 128.33(13) . . ?
O6 Fe2 O4 76.59(13) . . ?
O6 Fe2 O5 78.74(13) . . ?
O4 Fe2 O5 77.54(13) . . ?
O6 Fe2 N5 151.64(16) . . ?
O4 Fe2 N5 121.72(15) . . ?
O5 Fe2 N5 84.30(15) . . ?
O6 Fe2 N4 120.14(15) . . ?
O4 Fe2 N4 84.39(15) . . ?
O5 Fe2 N4 150.05(16) . . ?
N5 Fe2 N4 85.19(17) . . ?
O6 Fe2 N6 84.71(15) . . ?
O4 Fe2 N6 150.96(14) . . ?
O5 Fe2 N6 120.60(16) . . ?
N5 Fe2 N6 84.60(17) . . ?
N4 Fe2 N6 86.11(18) . . ?
O6 Fe2 Gd1 46.75(9) . . ?
O4 Fe2 Gd1 46.22(9) . . ?
O5 Fe2 Gd1 46.14(8) . . ?
N5 Fe2 Gd1 128.35(12) . . ?
N4 Fe2 Gd1 128.67(11) . . ?
N6 Fe2 Gd1 128.55(13) . . ?
O5 Gd1 O4 67.53(11) . . ?
O5 Gd1 O1 113.70(11) . . ?
O4 Gd1 O1 178.18(11) . . ?
O5 Gd1 O3 109.65(11) . . ?
O4 Gd1 O3 113.61(11) . . ?
O1 Gd1 O3 67.44(10) . . ?
O5 Gd1 O6 68.00(11) . . ?
O4 Gd1 O6 66.10(12) . . ?
O1 Gd1 O6 112.92(11) . . ?
O3 Gd1 O6 177.62(11) . . ?
O5 Gd1 O2 176.67(11) . . ?
O4 Gd1 O2 112.81(11) . . ?
O1 Gd1 O2 66.05(11) . . ?
O3 Gd1 O2 67.09(10) . . ?
O6 Gd1 O2 115.26(10) . . ?
O5 Gd1 O8 123.95(11) . . ?
O4 Gd1 O8 64.69(10) . . ?
O1 Gd1 O8 113.57(11) . . ?
O3 Gd1 O8 115.04(10) . . ?
O6 Gd1 O8 67.11(11) . . ?
O2 Gd1 O8 58.21(11) . . ?
O5 Gd1 O12 116.48(11) . . ?
O4 Gd1 O12 112.42(11) . . ?
O1 Gd1 O12 65.90(10) . . ?
O3 Gd1 O12 123.86(10) . . ?
O6 Gd1 O12 57.84(10) . . ?
O2 Gd1 O12 66.63(10) . . ?
O8 Gd1 O12 61.03(10) . . ?
O5 Gd1 O7 66.42(11) . . ?
O4 Gd1 O7 121.99(11) . . ?
O1 Gd1 O7 58.12(10) . . ?
O3 Gd1 O7 113.72(11) . . ?
O6 Gd1 O7 65.21(11) . . ?
O2 Gd1 O7 115.21(11) . . ?
O8 Gd1 O7 119.29(10) . . ?
O12 Gd1 O7 62.63(10) . . ?
O5 Gd1 O10 112.67(11) . . ?
O4 Gd1 O10 57.50(11) . . ?
O1 Gd1 O10 122.42(10) . . ?
O3 Gd1 O10 66.20(11) . . ?
O6 Gd1 O10 114.82(11) . . ?
O2 Gd1 O10 65.69(10) . . ?
O8 Gd1 O10 61.37(10) . . ?
O12 Gd1 O10 118.25(10) . . ?
O7 Gd1 O10 179.05(10) . . ?
O5 Gd1 O11 57.73(10) . . ?
O4 Gd1 O11 116.79(10) . . ?
O1 Gd1 O11 64.96(10) . . ?
O3 Gd1 O11 63.78(10) . . ?
O6 Gd1 O11 114.09(10) . . ?
O2 Gd1 O11 120.12(10) . . ?
O8 Gd1 O11 178.31(10) . . ?
O12 Gd1 O11 118.40(10) . . ?
O7 Gd1 O11 60.87(10) . . ?
O10 Gd1 O11 118.49(10) . . ?
O5 Gd1 Fe2 39.86(8) . . ?
O4 Gd1 Fe2 39.77(8) . . ?
O1 Gd1 Fe2 140.38(8) . . ?
O3 Gd1 Fe2 138.74(7) . . ?
O6 Gd1 Fe2 39.55(8) . . ?
O2 Gd1 Fe2 142.34(8) . . ?
O8 Gd1 Fe2 84.14(7) . . ?
O12 Gd1 Fe2 97.38(7) . . ?
O7 Gd1 Fe2 82.26(7) . . ?
O10 Gd1 Fe2 97.19(7) . . ?
O11 Gd1 Fe2 97.53(7) . . ?
O32 Cl1 O31 109.0(6) . . ?
O32 Cl1 O33 108.2(4) . . ?
O31 Cl1 O33 109.8(5) . . ?
O32 Cl1 O30 105.2(5) . . ?
O31 Cl1 O30 108.3(6) . . ?
O33 Cl1 O30 116.0(6) . . ?
O10 C40 C41 115.4(4) . . ?
O10 C40 C39 124.7(5) . . ?
C41 C40 C39 119.9(5) . . ?
#==============================================================END
data_9
#----------------------------------------------------------------------------#
#                   CHEMICAL INFORMATION                                     #
#----------------------------------------------------------------------------#
 
_chemical_name_systematic
;
 ?
;
_chemical_formula_moiety                'C59 H64 Cl Fe2 N6 O17 Tb'
_chemical_formula_sum                   'C59 H64 Cl Fe2 N6 O17 Tb'
_chemical_formula_weight                1435.23
_chemical_compound_source               'synthesis as described'
_chemical_absolute_configuration        ad
 
#----------------------------------------------------------------------------#
#                   UNIT CELL INFORMATION                                    #
#----------------------------------------------------------------------------#
 
_symmetry_cell_setting                  orthorhombic
_symmetry_space_group_name_H-M          'P 21 21 21'
_symmetry_space_group_name_Hall         'P 2ac 2ab'
_symmetry_Int_Tables_number             19
loop_
    _symmetry_equiv_pos_as_xyz
'x, y, z'
'-x+1/2, -y, z+1/2'
'x+1/2, -y+1/2, -z'
'-x, y+1/2, -z+1/2'
 
_cell_length_a                          15.6954(12)
_cell_length_b                          24.0336(19)
_cell_length_c                          15.9343(12)
_cell_angle_alpha                       90
_cell_angle_beta                        90
_cell_angle_gamma                       90
_cell_volume                            6010.7(8)
_cell_formula_units_Z                   4
_cell_measurement_temperature          150
_cell_measurement_reflns_used           8000
_cell_measurement_theta_min             1.65
_cell_measurement_theta_max             26.05
_cell_measurement_wavelength            0.71073
 
#----------------------------------------------------------------------------#
#                   CRYSTAL INFORMATION                                      #
#----------------------------------------------------------------------------#
 
_exptl_crystal_description              block
_exptl_crystal_colour                   red
_exptl_crystal_size_max                 0.12
_exptl_crystal_size_mid                 0.12
_exptl_crystal_size_min                 0.1
_exptl_crystal_density_diffrn           1.586
_exptl_crystal_density_method           'not measured'
_exptl_crystal_F_000                    2920
_exptl_special_details
;
 ?
;
 
#----------------------------------------------------------------------------#
#                   ABSORPTION CORRECTION                                    #
#----------------------------------------------------------------------------#
 
_exptl_absorpt_coefficient_mu           1.76
_exptl_absorpt_correction_type          refdelf
_exptl_absorpt_process_details
;
        (See: Walker, N. & Stuart, D. (1983) Acta Cryst. A39, 158-166)
;
_exptl_absorpt_correction_T_min         0.766
_exptl_absorpt_correction_T_max         0.841

 
#----------------------------------------------------------------------------#
#                   DATA COLLECTION                                          #
#----------------------------------------------------------------------------#
 
_diffrn_ambient_temperature             150
_diffrn_radiation_wavelength      0.71073
_diffrn_radiation_type            MoK\a
_diffrn_radiation_source          'fine-focus sealed tube'
_diffrn_radiation_monochromator   graphite
_diffrn_measurement_device        'Stoe IPDS' 
_diffrn_measurement_method        \f 
_diffrn_standards_number          200 
_diffrn_standards_interval_count  ? 
_diffrn_standards_interval_time   4 
_diffrn_standards_decay_%         0.1
_diffrn_reflns_av_R_equivalents         0.0848
_diffrn_reflns_av_unetI/netI            0.0738
_diffrn_reflns_number                   60152
_diffrn_reflns_limit_h_min              -19
_diffrn_reflns_limit_h_max              19
_diffrn_reflns_limit_k_min              -29
_diffrn_reflns_limit_k_max              29
_diffrn_reflns_limit_l_min              -19
_diffrn_reflns_limit_l_max              19
_diffrn_reflns_theta_min                2.01
_diffrn_reflns_theta_max                26.02
_diffrn_reflns_theta_full               26.02
_diffrn_measured_fraction_theta_full
                                        0.994
_diffrn_measured_fraction_theta_max
                                        0.994
_reflns_number_total                    11767
_reflns_number_gt                       8343
_reflns_threshold_expression          >2\s(I)
                  
#----------------------------------------------------------------------------#
#                   COMPUTER PROGRAMS USED                                   #
#----------------------------------------------------------------------------#
 
_computing_data_collection              'Stoe IPDS software (Stoe, 1996)'
_computing_cell_refinement              'Stoe IPDS software (Stoe, 1996)'
_computing_data_reduction               'XRED (Stoe, 1.08, 1996)'
_computing_structure_solution           'SIR92 (Giacovazzo et al, 1993)'
_computing_structure_refinement         'SHELXL-97 (Sheldrick, 1997)'
_computing_molecular_graphics           'Ortep-3 for Windows (Farrugia, 1997)'
_computing_publication_material
                                   'WinGX publication routines (Farrugia, 1999)'
 
#----------------------------------------------------------------------------#
#                   REFINEMENT INFORMATION                                   #
#----------------------------------------------------------------------------#
 
_refine_special_details
;
 Refinement of F^2^ against ALL reflections.  The weighted R-factor wR and
 goodness of fit S are based on F^2^, conventional R-factors R are based
 on F, with F set to zero for negative F^2^. The threshold expression of
 F^2^ > 2sigma(F^2^) is used only for calculating R-factors(gt) etc. and is
 not relevant to the choice of reflections for refinement.  R-factors based
 on F^2^ are statistically about twice as large as those based on F, and R-
 factors based on ALL data will be even larger.
;
_refine_ls_structure_factor_coef        Fsqd
_refine_ls_matrix_type                  full
_refine_ls_weighting_scheme             calc
_refine_ls_weighting_details
         'calc w=1/[\s^2^(Fo^2^)+(0.0741P)^2^+0.0000P] where P=(Fo^2^+2Fc^2^)/3'
_atom_sites_solution_primary            direct
_atom_sites_solution_secondary          difmap
_atom_sites_solution_hydrogens          geom
_refine_ls_hydrogen_treatment          constr
_refine_ls_extinction_method            none
_refine_ls_number_reflns                11767
_refine_ls_number_parameters            788
_refine_ls_number_restraints            0
_refine_ls_R_factor_all                 0.0763
_refine_ls_R_factor_gt                  0.05
_refine_ls_wR_factor_ref                0.1278
_refine_ls_wR_factor_gt                 0.1143
_refine_ls_goodness_of_fit_ref          1.003
_refine_ls_restrained_S_all             1.003
_refine_ls_shift/su_max                 0.001
_refine_ls_shift/su_mean                0
_refine_ls_abs_structure_details
                                    'Flack H D (1983), Acta Cryst. A39, 876-881'
_refine_ls_abs_structure_Flack          -0.025(12)
_refine_diff_density_max                0.854
_refine_diff_density_min                -0.948
_refine_diff_density_rms                0.12
 
#----------------------------------------------------------------------------#
#                   ATOMIC TYPES, COORDINATES AND THERMAL PARAMETERS         #
#----------------------------------------------------------------------------#
 
loop_
    _atom_type_symbol
    _atom_type_description
    _atom_type_scat_dispersion_real
    _atom_type_scat_dispersion_imag
    _atom_type_scat_source
C C 0.0033 0.0016 'International Tables Vol C Tables 4.2.6.8 and 6.1.1.4'
H H 0 0 'International Tables Vol C Tables 4.2.6.8 and 6.1.1.4'
N N 0.0061 0.0033 'International Tables Vol C Tables 4.2.6.8 and 6.1.1.4'
O O 0.0106 0.006 'International Tables Vol C Tables 4.2.6.8 and 6.1.1.4'
Cl Cl 0.1484 0.1585 'International Tables Vol C Tables 4.2.6.8 and 6.1.1.4'
Fe Fe 0.3463 0.8444 'International Tables Vol C Tables 4.2.6.8 and 6.1.1.4'
Tb Tb -0.1723 4.1537 'International Tables Vol C Tables 4.2.6.8 and 6.1.1.4'
 
loop_
    _atom_site_label
    _atom_site_type_symbol
    _atom_site_fract_x
    _atom_site_fract_y
    _atom_site_fract_z
    _atom_site_U_iso_or_equiv
    _atom_site_adp_type
    _atom_site_occupancy
    _atom_site_symmetry_multiplicity
    _atom_site_calc_flag
    _atom_site_refinement_flags
    _atom_site_disorder_assembly
    _atom_site_disorder_group
C1 C 0.8218(6) 0.9835(3) 0.1168(6) 0.048(2) Uani 1 1 d . . .
H1A H 0.8081 1.0227 0.112 0.057 Uiso 1 1 calc R . .
H1B H 0.7868 0.9681 0.1613 0.057 Uiso 1 1 calc R . .
C2 C 0.7838(7) 0.8924(4) 0.0459(7) 0.057(2) Uani 1 1 d . . .
H2A H 0.7264 0.8865 0.0666 0.069 Uiso 1 1 calc R . .
H2B H 0.7887 0.8734 -0.0076 0.069 Uiso 1 1 calc R . .
C3 C 0.8689(7) 0.9638(4) -0.0312(6) 0.062(3) Uani 1 1 d . . .
H3A H 0.846 0.9584 -0.0871 0.074 Uiso 1 1 calc R . .
H3B H 0.8871 1.0023 -0.0271 0.074 Uiso 1 1 calc R . .
C4 C 0.7977(6) 0.9540(3) 0.0325(5) 0.046(2) Uani 1 1 d . . .
C5 C 0.7166(6) 0.9793(4) 0.0003(7) 0.062(3) Uani 1 1 d . . .
H5A H 0.6961 0.9579 -0.0464 0.093 Uiso 1 1 calc R . .
H5B H 0.7273 1.0168 -0.0175 0.093 Uiso 1 1 calc R . .
H5C H 0.6747 0.9793 0.0441 0.093 Uiso 1 1 calc R . .
C6 C 1.4769(6) 0.8126(4) 0.3846(5) 0.049(2) Uani 1 1 d . . .
H6A H 1.4953 0.8136 0.4427 0.058 Uiso 1 1 calc R . .
H6B H 1.5093 0.8404 0.354 0.058 Uiso 1 1 calc R . .
C7 C 1.5103(6) 0.7610(4) 0.2497(5) 0.050(2) Uani 1 1 d . . .
H7A H 1.5672 0.7751 0.2393 0.06 Uiso 1 1 calc R . .
H7B H 1.5057 0.7247 0.2233 0.06 Uiso 1 1 calc R . .
C8 C 1.4253(6) 0.7134(4) 0.3674(6) 0.051(2) Uani 1 1 d . . .
H8A H 1.448 0.6759 0.3644 0.061 Uiso 1 1 calc R . .
H8B H 1.4058 0.7196 0.4244 0.061 Uiso 1 1 calc R . .
C9 C 1.4964(6) 0.7546(3) 0.3476(5) 0.043(2) Uani 1 1 d . . .
C10 C 1.5794(6) 0.7327(4) 0.3849(6) 0.055(2) Uani 1 1 d . . .
H10A H 1.5729 0.7281 0.4444 0.082 Uiso 1 1 calc R . .
H10B H 1.6244 0.7588 0.374 0.082 Uiso 1 1 calc R . .
H10C H 1.5932 0.6975 0.3598 0.082 Uiso 1 1 calc R . .
C11 C 0.9487(6) 1.0249(3) 0.1582(5) 0.043(2) Uani 1 1 d . . .
H11 H 0.9177 1.0575 0.1504 0.052 Uiso 1 1 calc R . .
C12 C 1.0338(5) 1.0313(3) 0.1882(5) 0.0381(17) Uani 1 1 d . . .
C13 C 1.0581(6) 1.0860(3) 0.2119(5) 0.042(2) Uani 1 1 d . . .
H13 H 1.0203 1.1153 0.2038 0.051 Uiso 1 1 calc R . .
C14 C 1.1369(6) 1.0963(3) 0.2469(5) 0.047(2) Uani 1 1 d . . .
H14 H 1.1522 1.1325 0.2615 0.056 Uiso 1 1 calc R . .
C15 C 1.1935(5) 1.0527(3) 0.2603(5) 0.0365(17) Uani 1 1 d . . .
H15 H 1.2458 1.0593 0.286 0.044 Uiso 1 1 calc R . .
C16 C 1.1720(5) 1.0001(3) 0.2353(5) 0.0361(17) Uani 1 1 d . . .
C17 C 1.0923(5) 0.9861(3) 0.1980(5) 0.0346(17) Uani 1 1 d . . .
C18 C 1.3067(5) 0.9628(3) 0.2791(5) 0.0394(19) Uani 1 1 d . . .
H18A H 1.3365 0.9892 0.2447 0.059 Uiso 1 1 calc R . .
H18B H 1.3373 0.9282 0.2795 0.059 Uiso 1 1 calc R . .
H18C H 1.3025 0.9769 0.3353 0.059 Uiso 1 1 calc R . .
C19 C 0.8139(6) 0.8365(3) 0.1659(6) 0.047(2) Uani 1 1 d . . .
H19 H 0.7548 0.8346 0.1669 0.056 Uiso 1 1 calc R . .
C20 C 0.8561(6) 0.8060(3) 0.2289(5) 0.0455(19) Uani 1 1 d . . .
C21 C 0.8070(5) 0.7735(3) 0.2828(6) 0.049(2) Uani 1 1 d . . .
H21 H 0.7482 0.7733 0.2758 0.058 Uiso 1 1 calc R . .
C22 C 0.8415(7) 0.7419(3) 0.3454(6) 0.057(2) Uani 1 1 d . . .
H22 H 0.807 0.7221 0.3823 0.068 Uiso 1 1 calc R . .
C23 C 0.9306(6) 0.7404(4) 0.3523(6) 0.049(2) Uani 1 1 d . . .
H23 H 0.9554 0.7168 0.3916 0.059 Uiso 1 1 calc R . .
C24 C 0.9821(6) 0.7727(3) 0.3026(5) 0.0401(19) Uani 1 1 d . . .
C25 C 0.9484(5) 0.8069(3) 0.2417(5) 0.0377(18) Uani 1 1 d . . .
C26 C 1.1088(6) 0.7401(3) 0.3679(5) 0.043(2) Uani 1 1 d . . .
H26A H 1.0904 0.7526 0.4221 0.065 Uiso 1 1 calc R . .
H26B H 1.1696 0.7435 0.3638 0.065 Uiso 1 1 calc R . .
H26C H 1.0927 0.7019 0.3604 0.065 Uiso 1 1 calc R . .
C27 C 0.9803(6) 0.9106(3) -0.0886(5) 0.048(2) Uani 1 1 d . . .
H27 H 0.954 0.9207 -0.1386 0.058 Uiso 1 1 calc R . .
C28 C 1.0573(5) 0.8774(3) -0.0959(5) 0.0421(19) Uani 1 1 d . . .
C29 C 1.0908(6) 0.8704(3) -0.1752(5) 0.046(2) Uani 1 1 d . . .
H29 H 1.0622 0.8863 -0.2203 0.055 Uiso 1 1 calc R . .
C30 C 1.1642(5) 0.8412(3) -0.1909(5) 0.047(2) Uani 1 1 d . . .
H30 H 1.1847 0.8375 -0.2454 0.057 Uiso 1 1 calc R . .
C31 C 1.2086(6) 0.8167(3) -0.1224(5) 0.044(2) Uani 1 1 d . . .
H31 H 1.2585 0.7966 -0.1309 0.052 Uiso 1 1 calc R . .
C32 C 1.1755(5) 0.8237(3) -0.0431(5) 0.0369(18) Uani 1 1 d . . .
C33 C 1.0996(5) 0.8526(3) -0.0251(5) 0.0366(16) Uani 1 1 d . . .
C34 C 1.2887(5) 0.7700(3) 0.0187(5) 0.043(2) Uani 1 1 d . . .
H34A H 1.2735 0.7354 -0.0073 0.064 Uiso 1 1 calc R . .
H34B H 1.3148 0.7628 0.0721 0.064 Uiso 1 1 calc R . .
H34C H 1.3281 0.7896 -0.0166 0.064 Uiso 1 1 calc R . .
C35 C 1.3512(5) 0.8455(3) 0.4465(4) 0.0403(15) Uani 1 1 d . . .
H35 H 1.3854 0.8468 0.4941 0.048 Uiso 1 1 calc R . .
C36 C 1.2651(6) 0.8650(3) 0.4566(5) 0.0389(19) Uani 1 1 d . . .
C37 C 1.2433(6) 0.8858(3) 0.5369(5) 0.043(2) Uani 1 1 d . . .
H37 H 1.2836 0.8853 0.5797 0.051 Uiso 1 1 calc R . .
C38 C 1.1629(6) 0.9068(3) 0.5525(5) 0.0406(19) Uani 1 1 d . . .
H38 H 1.1487 0.9191 0.606 0.049 Uiso 1 1 calc R . .
C39 C 1.1038(5) 0.9095(3) 0.4886(5) 0.0410(18) Uani 1 1 d . . .
H39 H 1.0502 0.9246 0.4987 0.049 Uiso 1 1 calc R . .
C40 C 1.1239(5) 0.8900(3) 0.4102(5) 0.0349(18) Uani 1 1 d . . .
C41 C 1.2047(5) 0.8656(3) 0.3915(5) 0.0369(18) Uani 1 1 d . . .
C42 C 0.9895(6) 0.9192(3) 0.3513(5) 0.045(2) Uani 1 1 d . . .
H42A H 0.9535 0.8959 0.3851 0.068 Uiso 1 1 calc R . .
H42B H 0.9636 0.9247 0.2974 0.068 Uiso 1 1 calc R . .
H42C H 0.9969 0.9545 0.3785 0.068 Uiso 1 1 calc R . .
C43 C 1.4798(6) 0.8321(3) 0.1577(5) 0.044(2) Uani 1 1 d . . .
H43 H 1.5386 0.8302 0.1507 0.052 Uiso 1 1 calc R . .
C44 C 1.4373(5) 0.8715(3) 0.1070(5) 0.0388(18) Uani 1 1 d . . .
C45 C 1.4828(6) 0.9007(3) 0.0466(5) 0.044(2) Uani 1 1 d . . .
H45 H 1.5415 0.8956 0.0438 0.053 Uiso 1 1 calc R . .
C46 C 1.4460(6) 0.9362(3) -0.0082(6) 0.050(2) Uani 1 1 d . . .
H46 H 1.4789 0.9545 -0.0481 0.06 Uiso 1 1 calc R . .
C47 C 1.3585(6) 0.9451(3) -0.0047(5) 0.0387(18) Uani 1 1 d . . .
H47 H 1.3327 0.9686 -0.0435 0.046 Uiso 1 1 calc R . .
C48 C 1.3115(5) 0.9201(3) 0.0539(5) 0.0359(17) Uani 1 1 d . . .
C49 C 1.3440(5) 0.8820(3) 0.1123(4) 0.0334(16) Uani 1 1 d . . .
C50 C 1.1835(6) 0.9672(3) 0.0118(5) 0.0418(19) Uani 1 1 d . . .
H50A H 1.2101 1.0027 0.0208 0.063 Uiso 1 1 calc R . .
H50B H 1.124 0.9697 0.0252 0.063 Uiso 1 1 calc R . .
H50C H 1.1901 0.9566 -0.0459 0.063 Uiso 1 1 calc R . .
C51 C 1.3208(6) 0.6733(3) 0.2801(5) 0.048(2) Uani 1 1 d . . .
H51 H 1.3506 0.6409 0.2931 0.058 Uiso 1 1 calc R . .
C52 C 1.2464(6) 0.6656(3) 0.2295(6) 0.045(2) Uani 1 1 d . . .
C53 C 1.2151(6) 0.6111(3) 0.2175(5) 0.044(2) Uani 1 1 d . . .
H53 H 1.2467 0.5812 0.2375 0.053 Uiso 1 1 calc R . .
C54 C 1.1410(6) 0.6012(3) 0.1779(6) 0.052(2) Uani 1 1 d . . .
H54 H 1.1221 0.5648 0.1717 0.063 Uiso 1 1 calc R . .
C55 C 1.0921(6) 0.6446(3) 0.1459(5) 0.048(2) Uani 1 1 d . . .
H55 H 1.0401 0.6376 0.12 0.057 Uiso 1 1 calc R . .
C56 C 1.1220(5) 0.6976(3) 0.1532(5) 0.0406(19) Uani 1 1 d . . .
C57 C 1.1969(5) 0.7117(3) 0.1962(5) 0.0392(18) Uani 1 1 d . . .
C58 C 1.0035(6) 0.7355(3) 0.0763(6) 0.048(2) Uani 1 1 d . . .
H58A H 1.0167 0.7133 0.0279 0.072 Uiso 1 1 calc R . .
H58B H 0.9802 0.7706 0.0585 0.072 Uiso 1 1 calc R . .
H58C H 0.9626 0.7164 0.1105 0.072 Uiso 1 1 calc R . .
N1 N 0.9095(4) 0.9783(3) 0.1406(4) 0.0398(16) Uani 1 1 d . . .
N2 N 0.8461(5) 0.8669(2) 0.1068(4) 0.0453(16) Uani 1 1 d . . .
N3 N 0.9445(5) 0.9276(3) -0.0210(4) 0.0471(18) Uani 1 1 d . . .
N4 N 1.3860(4) 0.8269(3) 0.3805(4) 0.0432(16) Uani 1 1 d . . .
N5 N 1.4483(5) 0.7985(3) 0.2122(4) 0.0426(16) Uani 1 1 d . . .
N6 N 1.3523(5) 0.7181(2) 0.3099(4) 0.0451(15) Uani 1 1 d . . .
O1 O 1.0748(3) 0.93587(18) 0.1735(4) 0.0403(13) Uani 1 1 d . . .
O2 O 0.9966(3) 0.83957(19) 0.1953(3) 0.0388(12) Uani 1 1 d . . .
O3 O 1.0729(3) 0.8580(2) 0.0522(3) 0.0374(12) Uani 1 1 d . . .
O4 O 1.2194(3) 0.8460(2) 0.3169(3) 0.0360(10) Uani 1 1 d . . .
O5 O 1.2979(3) 0.8575(2) 0.1682(3) 0.0358(12) Uani 1 1 d . . .
O6 O 1.2215(3) 0.76295(18) 0.2038(3) 0.0366(12) Uani 1 1 d . . .
O7 O 1.2232(3) 0.95401(19) 0.2460(3) 0.0393(12) Uani 1 1 d . . .
O8 O 1.0693(3) 0.7735(2) 0.3041(3) 0.0392(12) Uani 1 1 d . . .
O9 O 1.2138(3) 0.8031(2) 0.0306(3) 0.0373(12) Uani 1 1 d . . .
O10 O 1.0713(4) 0.8928(2) 0.3408(3) 0.0390(12) Uani 1 1 d . . .
O11 O 1.2232(4) 0.9261(2) 0.0649(3) 0.0383(12) Uani 1 1 d . . .
O12 O 1.0803(4) 0.7451(2) 0.1243(3) 0.0399(13) Uani 1 1 d . . .
O21 O 0.6376(6) 0.9144(4) 0.1942(6) 0.101(3) Uani 1 1 d . A .
O22 O 0.5661(9) 0.9410(6) 0.3225(15) 0.217(9) Uani 1 1 d . A .
O23 O 0.6603(10) 0.8778(9) 0.3135(10) 0.234(10) Uani 1 1 d . A .
Cl1 Cl 0.6422(3) 0.93201(15) 0.2810(2) 0.0918(9) Uani 1 1 d . . .
O24A O 0.7146(12) 0.9587(10) 0.3015(12) 0.138(8) Uani 0.56 1 d P A 1
O24B O 0.6447(17) 0.9953(13) 0.2642(15) 0.138(8) Uani 0.44 1 d P A 2
Tb1 Tb 1.14714(2) 0.849292(14) 0.18374(2) 0.03635(10) Uani 1 1 d . . .
Fe1 Fe 0.97165(8) 0.90219(4) 0.10644(7) 0.0373(3) Uani 1 1 d . . .
Fe2 Fe 1.32358(7) 0.80090(4) 0.26647(7) 0.0360(3) Uani 1 1 d . . .
O25 O 0.6553(8) 0.8747(4) 0.5027(8) 0.115(3) Uani 1 1 d . . .
H25 H 0.6219 0.8485 0.5002 0.173 Uiso 1 1 calc R . .
C100 C 0.7396(9) 0.8542(5) 0.5055(8) 0.088(4) Uani 1 1 d . . .
H10D H 0.7707 0.8676 0.4577 0.132 Uiso 1 1 calc R . .
H10E H 0.7387 0.8143 0.5047 0.132 Uiso 1 1 calc R . .
H10F H 0.7668 0.8668 0.556 0.132 Uiso 1 1 calc R . .
 
loop_
    _atom_site_aniso_label
    _atom_site_aniso_U_11
    _atom_site_aniso_U_22
    _atom_site_aniso_U_33
    _atom_site_aniso_U_23
    _atom_site_aniso_U_13
    _atom_site_aniso_U_12
C1 0.039(5) 0.048(4) 0.055(5) -0.004(4) -0.011(4) -0.004(4)
C2 0.058(6) 0.050(5) 0.064(6) -0.006(4) -0.018(5) -0.009(4)
C3 0.084(8) 0.043(5) 0.060(6) -0.005(4) -0.023(6) 0.000(5)
C4 0.051(6) 0.040(4) 0.047(5) -0.010(4) -0.020(4) 0.010(4)
C5 0.048(6) 0.054(5) 0.083(7) 0.001(5) -0.037(6) 0.005(4)
C6 0.050(5) 0.059(5) 0.038(5) -0.002(4) -0.008(4) 0.006(4)
C7 0.050(6) 0.063(5) 0.038(5) 0.001(4) 0.005(4) 0.020(4)
C8 0.059(6) 0.052(5) 0.043(5) 0.009(4) -0.009(4) 0.013(4)
C9 0.044(5) 0.050(5) 0.033(4) 0.003(3) -0.005(4) 0.008(4)
C10 0.041(5) 0.077(6) 0.046(5) 0.010(5) -0.004(4) 0.011(4)
C11 0.051(5) 0.035(4) 0.043(5) -0.004(3) -0.008(4) 0.000(3)
C12 0.037(4) 0.042(4) 0.035(4) 0.001(4) -0.001(4) 0.006(3)
C13 0.048(5) 0.022(3) 0.057(5) -0.002(3) 0.006(4) -0.002(3)
C14 0.054(6) 0.042(4) 0.046(4) -0.007(3) -0.002(4) -0.020(4)
C15 0.041(5) 0.036(4) 0.033(4) -0.006(3) -0.003(4) -0.004(3)
C16 0.038(5) 0.037(4) 0.034(4) 0.000(3) 0.004(3) 0.005(3)
C17 0.036(4) 0.038(4) 0.030(4) -0.008(3) 0.000(3) -0.004(3)
C18 0.031(4) 0.037(4) 0.050(5) -0.015(3) -0.017(4) -0.011(3)
C19 0.033(4) 0.040(4) 0.067(6) -0.007(4) -0.005(4) -0.002(3)
C20 0.040(5) 0.041(4) 0.056(5) -0.010(4) -0.009(5) 0.004(4)
C21 0.029(4) 0.045(4) 0.073(6) -0.005(4) 0.011(4) -0.011(4)
C22 0.057(7) 0.046(4) 0.067(6) 0.005(4) 0.019(5) -0.005(4)
C23 0.047(6) 0.054(5) 0.046(5) 0.009(4) 0.006(4) 0.000(4)
C24 0.047(5) 0.037(4) 0.037(5) -0.007(3) 0.001(4) -0.004(3)
C25 0.047(5) 0.033(4) 0.033(4) -0.004(3) 0.015(4) -0.013(3)
C26 0.048(5) 0.046(4) 0.035(4) 0.020(4) -0.003(4) 0.003(4)
C27 0.054(6) 0.052(5) 0.038(5) -0.001(4) -0.010(4) -0.001(4)
C28 0.040(5) 0.051(4) 0.035(4) 0.003(4) -0.006(4) -0.007(4)
C29 0.058(6) 0.053(4) 0.027(4) 0.008(4) -0.009(4) -0.012(4)
C30 0.058(6) 0.060(5) 0.025(3) -0.006(4) -0.002(4) -0.006(4)
C31 0.045(5) 0.055(5) 0.031(4) -0.008(3) 0.002(4) -0.020(4)
C32 0.049(5) 0.034(4) 0.027(4) 0.008(3) -0.005(4) -0.006(3)
C33 0.035(4) 0.035(4) 0.040(4) -0.003(4) 0.003(3) -0.009(4)
C34 0.041(5) 0.050(4) 0.038(4) -0.011(4) 0.007(4) 0.017(4)
C35 0.040(4) 0.051(4) 0.030(3) -0.004(3) -0.004(4) 0.000(5)
C36 0.050(5) 0.030(4) 0.037(4) -0.001(3) -0.005(4) 0.001(3)
C37 0.063(6) 0.037(4) 0.028(4) -0.002(3) -0.010(4) -0.005(4)
C38 0.055(6) 0.031(3) 0.035(4) -0.006(3) 0.004(4) 0.004(4)
C39 0.039(5) 0.046(4) 0.039(4) 0.004(4) 0.004(4) 0.002(4)
C40 0.044(5) 0.028(3) 0.033(4) 0.006(3) -0.002(3) 0.002(3)
C41 0.043(5) 0.027(4) 0.041(4) -0.003(3) 0.010(4) 0.002(3)
C42 0.039(5) 0.054(5) 0.043(4) -0.018(4) 0.007(4) 0.019(4)
C43 0.041(5) 0.049(5) 0.041(5) -0.007(4) -0.003(4) 0.007(4)
C44 0.047(5) 0.031(4) 0.038(4) -0.003(3) -0.009(4) 0.002(3)
C45 0.038(5) 0.045(4) 0.051(5) 0.001(4) 0.016(4) -0.016(4)
C46 0.057(6) 0.046(5) 0.048(5) 0.004(4) 0.021(5) -0.007(4)
C47 0.049(5) 0.033(4) 0.035(4) 0.011(3) 0.006(4) -0.001(4)
C48 0.037(4) 0.031(4) 0.040(4) -0.007(3) 0.003(4) 0.000(3)
C49 0.035(4) 0.032(3) 0.034(4) -0.008(3) 0.005(4) -0.008(3)
C50 0.052(5) 0.038(4) 0.036(4) 0.017(3) -0.002(4) -0.004(4)
C51 0.057(6) 0.047(4) 0.041(4) 0.011(4) 0.008(4) 0.010(4)
C52 0.052(5) 0.034(4) 0.049(5) 0.006(3) 0.001(4) 0.006(3)
C53 0.068(6) 0.019(3) 0.045(5) 0.002(3) 0.003(4) 0.005(3)
C54 0.065(6) 0.038(4) 0.054(5) 0.000(4) 0.006(6) -0.006(4)
C55 0.066(6) 0.036(4) 0.041(4) -0.004(4) -0.004(4) -0.016(4)
C56 0.042(5) 0.041(4) 0.039(4) 0.005(3) 0.007(3) 0.008(4)
C57 0.041(5) 0.036(4) 0.041(5) -0.004(3) 0.003(4) 0.000(3)
C58 0.051(5) 0.040(4) 0.052(5) -0.013(4) -0.011(4) -0.008(4)
N1 0.029(4) 0.042(4) 0.048(4) -0.005(3) -0.012(3) 0.007(3)
N2 0.042(4) 0.042(3) 0.052(4) -0.006(3) -0.020(4) 0.009(3)
N3 0.055(5) 0.043(4) 0.043(4) 0.000(3) -0.013(4) 0.007(3)
N4 0.034(4) 0.048(3) 0.047(4) 0.005(3) -0.005(3) 0.000(3)
N5 0.054(4) 0.040(3) 0.034(4) 0.007(3) 0.002(3) 0.006(3)
N6 0.055(4) 0.039(3) 0.042(3) 0.002(3) -0.011(4) 0.005(3)
O1 0.038(3) 0.025(2) 0.058(4) -0.001(2) -0.003(3) 0.006(2)
O2 0.037(3) 0.036(3) 0.043(3) -0.008(2) -0.004(2) 0.001(2)
O3 0.045(3) 0.043(3) 0.023(2) 0.000(2) -0.004(2) 0.002(2)
O4 0.039(3) 0.039(2) 0.031(2) 0.000(3) 0.000(2) 0.000(2)
O5 0.037(3) 0.041(3) 0.029(3) -0.001(2) -0.001(2) -0.001(2)
O6 0.043(3) 0.026(2) 0.041(3) 0.003(2) 0.000(2) 0.004(2)
O7 0.043(3) 0.029(2) 0.047(3) -0.007(2) -0.012(3) 0.003(2)
O8 0.036(3) 0.046(3) 0.036(3) 0.010(2) 0.005(3) -0.003(2)
O9 0.044(3) 0.045(3) 0.023(3) -0.008(2) 0.005(2) 0.003(2)
O10 0.041(3) 0.050(3) 0.026(3) -0.008(2) -0.001(2) 0.009(2)
O11 0.042(3) 0.036(3) 0.036(3) 0.008(2) -0.005(3) -0.002(2)
O12 0.045(3) 0.033(3) 0.041(3) 0.000(2) -0.009(3) -0.009(2)
O21 0.086(6) 0.111(6) 0.108(6) -0.041(5) -0.023(6) -0.004(5)
O22 0.143(12) 0.147(11) 0.36(2) -0.110(14) 0.134(15) -0.046(9)
O23 0.167(13) 0.38(2) 0.157(12) 0.134(15) 0.047(12) 0.135(16)
Cl1 0.077(2) 0.109(2) 0.089(2) 0.0038(18) 0.013(2) -0.013(2)
O24A 0.093(11) 0.22(2) 0.102(11) -0.084(13) 0.021(9) -0.091(13)
O24B 0.093(11) 0.22(2) 0.102(11) -0.084(13) 0.021(9) -0.091(13)
Tb1 0.03835(19) 0.03728(16) 0.03341(17) 0.00028(16) -0.00199(18) 0.00184(16)
Fe1 0.0425(7) 0.0339(5) 0.0354(6) -0.0025(5) -0.0055(5) -0.0002(5)
Fe2 0.0398(7) 0.0380(5) 0.0302(6) 0.0002(4) 0.0010(5) 0.0040(5)
O25 0.114(8) 0.098(6) 0.134(8) 0.008(6) -0.031(8) 0.002(6)
C100 0.120(11) 0.063(7) 0.080(8) 0.005(6) -0.014(7) -0.006(8)
 
 
#----------------------------------------------------------------------------#
#                   MOLECULAR GEOMETRY                                       #
#----------------------------------------------------------------------------#
 
_geom_special_details
;
 All esds (except the esd in the dihedral angle between two l.s. planes)
 are estimated using the full covariance matrix.  The cell esds are taken
 into account individually in the estimation of esds in distances, angles
 and torsion angles; correlations between esds in cell parameters are only
 used when they are defined by crystal symmetry.  An approximate (isotropic)
 treatment of cell esds is used for estimating esds involving l.s. planes.
;
loop_
    _geom_bond_atom_site_label_1
    _geom_bond_atom_site_label_2
    _geom_bond_distance
    _geom_bond_site_symmetry_2
    _geom_bond_publ_flag
C1 N1 1.433(11) . ?
C1 C4 1.565(12) . ?
C2 N2 1.507(11) . ?
C2 C4 1.514(12) . ?
C3 N3 1.481(12) . ?
C3 C4 1.528(14) . ?
C4 C5 1.500(12) . ?
C6 N4 1.469(11) . ?
C6 C9 1.544(12) . ?
C7 N5 1.455(11) . ?
C7 C9 1.583(12) . ?
C8 N6 1.472(11) . ?
C8 C9 1.524(13) . ?
C9 C10 1.525(12) . ?
C11 N1 1.309(10) . ?
C11 C12 1.427(12) . ?
C12 C13 1.419(10) . ?
C12 C17 1.431(10) . ?
C13 C14 1.379(12) . ?
C14 C15 1.390(12) . ?
C15 C16 1.369(10) . ?
C16 O7 1.378(9) . ?
C16 C17 1.426(11) . ?
C17 O1 1.299(8) . ?
C18 O7 1.429(9) . ?
C19 N2 1.294(11) . ?
C19 C20 1.409(12) . ?
C20 C21 1.392(12) . ?
C20 C25 1.463(12) . ?
C21 C22 1.365(13) . ?
C22 C23 1.403(14) . ?
C23 C24 1.371(12) . ?
C24 O8 1.370(10) . ?
C24 C25 1.379(12) . ?
C25 O2 1.317(9) . ?
C26 O8 1.436(9) . ?
C27 N3 1.280(11) . ?
C27 C28 1.455(12) . ?
C28 C29 1.378(12) . ?
C28 C33 1.438(11) . ?
C29 C30 1.372(12) . ?
C30 C31 1.422(12) . ?
C31 C32 1.377(11) . ?
C32 C33 1.407(11) . ?
C32 O9 1.408(9) . ?
C33 O3 1.308(9) . ?
C34 O9 1.433(9) . ?
C35 N4 1.266(10) . ?
C35 C36 1.440(12) . ?
C36 C41 1.405(12) . ?
C36 C37 1.415(11) . ?
C37 C38 1.381(12) . ?
C38 C39 1.379(12) . ?
C39 C40 1.370(11) . ?
C40 O10 1.383(9) . ?
C40 C41 1.428(11) . ?
C41 O4 1.300(9) . ?
C42 O10 1.442(9) . ?
C43 N5 1.286(10) . ?
C43 C44 1.411(11) . ?
C44 C45 1.389(11) . ?
C44 C49 1.489(12) . ?
C45 C46 1.351(13) . ?
C46 C47 1.391(13) . ?
C47 C48 1.334(11) . ?
C48 C49 1.402(11) . ?
C48 O11 1.404(10) . ?
C49 O5 1.291(8) . ?
C50 O11 1.442(9) . ?
C51 N6 1.276(11) . ?
C51 C52 1.431(13) . ?
C52 C53 1.411(11) . ?
C52 C57 1.455(11) . ?
C53 C54 1.344(13) . ?
C54 C55 1.391(13) . ?
C55 C56 1.362(11) . ?
C56 O12 1.394(9) . ?
C56 C57 1.402(11) . ?
C57 O6 1.296(8) . ?
C58 O12 1.446(10) . ?
N1 Fe1 2.144(6) . ?
N2 Fe1 2.145(8) . ?
N3 Fe1 2.163(7) . ?
N4 Fe2 2.157(7) . ?
N5 Fe2 2.140(7) . ?
N6 Fe2 2.155(6) . ?
O1 Fe1 2.101(5) . ?
O1 Tb1 2.376(4) . ?
O2 Fe1 2.104(5) . ?
O2 Tb1 2.382(5) . ?
O3 Fe1 2.097(5) . ?
O3 Tb1 2.408(5) . ?
O4 Fe2 2.119(5) . ?
O4 Tb1 2.407(5) . ?
O5 Fe2 2.113(5) . ?
O5 Tb1 2.387(5) . ?
O6 Fe2 2.096(5) . ?
O6 Tb1 2.402(5) . ?
O8 Tb1 2.913(5) . ?
O9 Tb1 2.878(5) . ?
O11 Tb1 2.901(5) . ?
O12 Tb1 2.876(5) . ?
O21 Cl1 1.448(9) . ?
O22 Cl1 1.382(13) . ?
O23 Cl1 1.431(17) . ?
Cl1 O24A 1.345(15) . ?
Cl1 O24B 1.54(3) . ?
Tb1 Fe1 3.2741(12) . ?
Tb1 Fe2 3.2801(12) . ?
O25 C100 1.413(16) . ?
 
loop_
    _geom_angle_atom_site_label_1
    _geom_angle_atom_site_label_2
    _geom_angle_atom_site_label_3
    _geom_angle
    _geom_angle_site_symmetry_1
    _geom_angle_site_symmetry_3
    _geom_angle_publ_flag
N1 C1 C4 114.9(7) . . ?
N2 C2 C4 113.3(7) . . ?
N3 C3 C4 115.0(7) . . ?
C5 C4 C2 108.8(8) . . ?
C5 C4 C3 109.3(8) . . ?
C2 C4 C3 110.5(7) . . ?
C5 C4 C1 108.4(7) . . ?
C2 C4 C1 110.9(7) . . ?
C3 C4 C1 108.9(7) . . ?
N4 C6 C9 112.8(7) . . ?
N5 C7 C9 111.9(7) . . ?
N6 C8 C9 113.1(7) . . ?
C8 C9 C10 108.7(7) . . ?
C8 C9 C6 111.3(7) . . ?
C10 C9 C6 109.4(7) . . ?
C8 C9 C7 111.5(7) . . ?
C10 C9 C7 107.4(7) . . ?
C6 C9 C7 108.4(7) . . ?
N1 C11 C12 127.2(7) . . ?
C13 C12 C11 116.1(7) . . ?
C13 C12 C17 120.1(7) . . ?
C11 C12 C17 123.7(7) . . ?
C14 C13 C12 121.0(7) . . ?
C13 C14 C15 119.9(7) . . ?
C16 C15 C14 119.6(7) . . ?
C15 C16 O7 124.3(7) . . ?
C15 C16 C17 123.7(7) . . ?
O7 C16 C17 111.9(6) . . ?
O1 C17 C16 122.0(7) . . ?
O1 C17 C12 122.5(7) . . ?
C16 C17 C12 115.5(6) . . ?
N2 C19 C20 129.0(8) . . ?
C21 C20 C19 118.2(8) . . ?
C21 C20 C25 118.1(8) . . ?
C19 C20 C25 123.7(8) . . ?
C22 C21 C20 122.9(8) . . ?
C21 C22 C23 117.8(8) . . ?
C24 C23 C22 121.9(8) . . ?
O8 C24 C23 126.0(8) . . ?
O8 C24 C25 112.8(7) . . ?
C23 C24 C25 121.2(8) . . ?
O2 C25 C24 122.0(7) . . ?
O2 C25 C20 120.0(7) . . ?
C24 C25 C20 117.9(7) . . ?
N3 C27 C28 127.4(8) . . ?
C29 C28 C33 119.5(8) . . ?
C29 C28 C27 117.2(7) . . ?
C33 C28 C27 123.2(7) . . ?
C30 C29 C28 123.3(8) . . ?
C29 C30 C31 118.9(8) . . ?
C32 C31 C30 118.0(8) . . ?
C31 C32 C33 124.4(7) . . ?
C31 C32 O9 124.1(7) . . ?
C33 C32 O9 111.4(6) . . ?
O3 C33 C32 120.8(7) . . ?
O3 C33 C28 123.3(7) . . ?
C32 C33 C28 115.8(7) . . ?
N4 C35 C36 127.8(7) . . ?
C41 C36 C37 120.1(8) . . ?
C41 C36 C35 123.6(7) . . ?
C37 C36 C35 116.3(7) . . ?
C38 C37 C36 120.8(8) . . ?
C39 C38 C37 119.9(7) . . ?
C40 C39 C38 120.2(8) . . ?
C39 C40 O10 125.1(7) . . ?
C39 C40 C41 122.3(7) . . ?
O10 C40 C41 112.5(6) . . ?
O4 C41 C36 123.5(7) . . ?
O4 C41 C40 119.9(7) . . ?
C36 C41 C40 116.6(7) . . ?
N5 C43 C44 128.7(9) . . ?
C45 C44 C43 119.5(8) . . ?
C45 C44 C49 117.3(7) . . ?
C43 C44 C49 123.2(8) . . ?
C46 C45 C44 123.2(8) . . ?
C45 C46 C47 119.6(8) . . ?
C48 C47 C46 120.3(8) . . ?
C47 C48 C49 123.9(8) . . ?
C47 C48 O11 126.0(7) . . ?
C49 C48 O11 110.1(6) . . ?
O5 C49 C48 123.5(7) . . ?
O5 C49 C44 120.9(7) . . ?
C48 C49 C44 115.6(7) . . ?
N6 C51 C52 129.4(8) . . ?
C53 C52 C51 118.7(7) . . ?
C53 C52 C57 118.2(8) . . ?
C51 C52 C57 122.9(7) . . ?
C54 C53 C52 121.9(7) . . ?
C53 C54 C55 121.1(7) . . ?
C56 C55 C54 118.7(8) . . ?
C55 C56 O12 125.1(8) . . ?
C55 C56 C57 123.8(7) . . ?
O12 C56 C57 110.9(7) . . ?
O6 C57 C56 121.8(7) . . ?
O6 C57 C52 122.0(7) . . ?
C56 C57 C52 116.2(7) . . ?
C11 N1 C1 115.8(7) . . ?
C11 N1 Fe1 124.8(6) . . ?
C1 N1 Fe1 116.3(5) . . ?
C19 N2 C2 116.4(8) . . ?
C19 N2 Fe1 125.7(6) . . ?
C2 N2 Fe1 115.7(6) . . ?
C27 N3 C3 116.5(7) . . ?
C27 N3 Fe1 127.8(6) . . ?
C3 N3 Fe1 115.3(6) . . ?
C35 N4 C6 117.7(7) . . ?
C35 N4 Fe2 127.3(6) . . ?
C6 N4 Fe2 114.3(5) . . ?
C43 N5 C7 114.1(8) . . ?
C43 N5 Fe2 127.5(6) . . ?
C7 N5 Fe2 117.6(5) . . ?
C51 N6 C8 118.0(7) . . ?
C51 N6 Fe2 125.4(6) . . ?
C8 N6 Fe2 115.6(5) . . ?
C17 O1 Fe1 132.4(5) . . ?
C17 O1 Tb1 133.8(5) . . ?
Fe1 O1 Tb1 93.78(17) . . ?
C25 O2 Fe1 134.2(5) . . ?
C25 O2 Tb1 132.2(5) . . ?
Fe1 O2 Tb1 93.6(2) . . ?
C33 O3 Fe1 133.0(5) . . ?
C33 O3 Tb1 131.0(5) . . ?
Fe1 O3 Tb1 92.98(18) . . ?
C41 O4 Fe2 132.0(5) . . ?
C41 O4 Tb1 135.2(5) . . ?
Fe2 O4 Tb1 92.66(19) . . ?
C49 O5 Fe2 134.3(5) . . ?
C49 O5 Tb1 131.7(5) . . ?
Fe2 O5 Tb1 93.40(19) . . ?
C57 O6 Fe2 133.3(5) . . ?
C57 O6 Tb1 131.5(5) . . ?
Fe2 O6 Tb1 93.38(17) . . ?
C16 O7 C18 117.5(6) . . ?
C24 O8 C26 115.8(6) . . ?
C24 O8 Tb1 114.6(4) . . ?
C26 O8 Tb1 129.4(4) . . ?
C32 O9 C34 115.9(6) . . ?
C32 O9 Tb1 114.6(4) . . ?
C34 O9 Tb1 128.6(4) . . ?
C40 O10 C42 117.4(6) . . ?
C48 O11 C50 115.0(6) . . ?
C48 O11 Tb1 115.0(4) . . ?
C50 O11 Tb1 129.9(5) . . ?
C56 O12 C58 115.9(6) . . ?
C56 O12 Tb1 115.6(4) . . ?
C58 O12 Tb1 128.1(4) . . ?
O24A Cl1 O22 122.6(10) . . ?
O24A Cl1 O23 100.3(15) . . ?
O22 Cl1 O23 98.1(10) . . ?
O24A Cl1 O21 114.5(9) . . ?
O22 Cl1 O21 117.4(10) . . ?
O23 Cl1 O21 95.1(9) . . ?
O24A Cl1 O24B 63.4(14) . . ?
O22 Cl1 O24B 87.2(11) . . ?
O23 Cl1 O24B 162.6(14) . . ?
O21 Cl1 O24B 97.1(9) . . ?
O1 Tb1 O2 67.48(17) . . ?
O1 Tb1 O5 113.23(17) . . ?
O2 Tb1 O5 178.27(17) . . ?
O1 Tb1 O6 176.2(2) . . ?
O2 Tb1 O6 112.76(17) . . ?
O5 Tb1 O6 66.64(17) . . ?
O1 Tb1 O4 108.37(18) . . ?
O2 Tb1 O4 113.33(17) . . ?
O5 Tb1 O4 68.09(16) . . ?
O6 Tb1 O4 67.96(16) . . ?
O1 Tb1 O3 68.42(18) . . ?
O2 Tb1 O3 66.17(18) . . ?
O5 Tb1 O3 112.48(17) . . ?
O6 Tb1 O3 115.26(17) . . ?
O4 Tb1 O3 176.76(18) . . ?
O1 Tb1 O12 124.42(17) . . ?
O2 Tb1 O12 65.03(16) . . ?
O5 Tb1 O12 113.56(16) . . ?
O6 Tb1 O12 57.93(17) . . ?
O4 Tb1 O12 115.68(15) . . ?
O3 Tb1 O12 67.21(16) . . ?
O1 Tb1 O9 116.94(18) . . ?
O2 Tb1 O9 112.86(16) . . ?
O5 Tb1 O9 65.41(16) . . ?
O6 Tb1 O9 66.63(16) . . ?
O4 Tb1 O9 124.28(16) . . ?
O3 Tb1 O9 58.08(16) . . ?
O12 Tb1 O9 61.16(15) . . ?
O1 Tb1 O11 66.09(18) . . ?
O2 Tb1 O11 121.43(17) . . ?
O5 Tb1 O11 58.13(16) . . ?
O6 Tb1 O11 115.89(17) . . ?
O4 Tb1 O11 113.72(16) . . ?
O3 Tb1 O11 64.88(16) . . ?
O12 Tb1 O11 119.30(15) . . ?
O9 Tb1 O11 62.76(15) . . ?
O1 Tb1 O8 113.12(17) . . ?
O2 Tb1 O8 58.11(16) . . ?
O5 Tb1 O8 122.36(16) . . ?
O6 Tb1 O8 64.89(16) . . ?
O4 Tb1 O8 66.23(16) . . ?
O3 Tb1 O8 115.13(16) . . ?
O12 Tb1 O8 61.25(15) . . ?
O9 Tb1 O8 117.98(15) . . ?
O11 Tb1 O8 179.19(16) . . ?
O1 Tb1 Fe1 39.82(13) . . ?
O2 Tb1 Fe1 39.88(13) . . ?
O5 Tb1 Fe1 139.71(12) . . ?
O6 Tb1 Fe1 142.59(12) . . ?
O4 Tb1 Fe1 137.82(12) . . ?
O3 Tb1 Fe1 39.77(12) . . ?
O12 Tb1 Fe1 84.67(11) . . ?
O9 Tb1 Fe1 97.84(11) . . ?
O11 Tb1 Fe1 81.59(11) . . ?
O8 Tb1 Fe1 97.92(11) . . ?
O1 Tb1 Fe2 137.88(13) . . ?
O2 Tb1 Fe2 140.50(13) . . ?
O5 Tb1 Fe2 40.01(12) . . ?
O6 Tb1 Fe2 39.64(12) . . ?
O4 Tb1 Fe2 40.19(11) . . ?
O3 Tb1 Fe2 142.14(12) . . ?
O12 Tb1 Fe2 97.57(11) . . ?
O9 Tb1 Fe2 84.10(11) . . ?
O11 Tb1 Fe2 98.07(11) . . ?
O8 Tb1 Fe2 82.39(11) . . ?
Fe1 Tb1 Fe2 177.56(3) . . ?
O3 Fe1 O1 79.7(2) . . ?
O3 Fe1 O2 76.98(19) . . ?
O1 Fe1 O2 77.88(19) . . ?
O3 Fe1 N1 151.8(2) . . ?
O1 Fe1 N1 83.8(2) . . ?
O2 Fe1 N1 121.6(2) . . ?
O3 Fe1 N2 119.8(2) . . ?
O1 Fe1 N2 149.1(3) . . ?
O2 Fe1 N2 83.5(2) . . ?
N1 Fe1 N2 85.3(2) . . ?
O3 Fe1 N3 84.5(2) . . ?
O1 Fe1 N3 121.4(3) . . ?
O2 Fe1 N3 150.5(2) . . ?
N1 Fe1 N3 84.7(3) . . ?
N2 Fe1 N3 86.2(3) . . ?
O3 Fe1 Tb1 47.25(13) . . ?
O1 Fe1 Tb1 46.40(12) . . ?
O2 Fe1 Tb1 46.56(14) . . ?
N1 Fe1 Tb1 128.21(18) . . ?
N2 Fe1 Tb1 128.19(17) . . ?
N3 Fe1 Tb1 128.9(2) . . ?
O6 Fe2 O5 77.38(19) . . ?
O6 Fe2 O4 79.24(19) . . ?
O5 Fe2 O4 78.73(19) . . ?
O6 Fe2 N5 119.7(2) . . ?
O5 Fe2 N5 83.8(2) . . ?
O4 Fe2 N5 150.7(2) . . ?
O6 Fe2 N6 84.9(2) . . ?
O5 Fe2 N6 150.7(2) . . ?
O4 Fe2 N6 120.8(2) . . ?
N5 Fe2 N6 85.0(3) . . ?
O6 Fe2 N4 151.0(2) . . ?
O5 Fe2 N4 121.6(2) . . ?
O4 Fe2 N4 83.3(2) . . ?
N5 Fe2 N4 86.2(3) . . ?
N6 Fe2 N4 84.4(2) . . ?
O6 Fe2 Tb1 46.98(13) . . ?
O5 Fe2 Tb1 46.59(14) . . ?
O4 Fe2 Tb1 47.15(14) . . ?
N5 Fe2 Tb1 128.25(17) . . ?
N6 Fe2 Tb1 129.3(2) . . ?
N4 Fe2 Tb1 128.26(18) . . ?
#==================================================================END
data_10
#----------------------------------------------------------------------------#
#                   CHEMICAL INFORMATION                                     #
#----------------------------------------------------------------------------#
 
_chemical_name_systematic
;
 ?
;
_chemical_formula_moiety                'C58 H60 Dy Fe2 N6 O12, C H4 O, Cl O4' 
_chemical_formula_sum                   'C59 H64 Cl Dy Fe2 N6 O17'
_chemical_formula_weight                1438.81
_chemical_compound_source               'synthesis as described'
_chemical_absolute_configuration        ad
 
#----------------------------------------------------------------------------#
#                   UNIT CELL INFORMATION                                    #
#----------------------------------------------------------------------------#
 
_symmetry_cell_setting                  orthorhombic
_symmetry_space_group_name_H-M          'P 21 21 21'
_symmetry_space_group_name_Hall         'P 2ac 2ab'
_symmetry_Int_Tables_number             19
loop_
    _symmetry_equiv_pos_as_xyz
'x, y, z'
'-x+1/2, -y, z+1/2'
'x+1/2, -y+1/2, -z'
'-x, y+1/2, -z+1/2'
 
_cell_length_a                          15.6543(7)
_cell_length_b                          15.9364(8)
_cell_length_c                          24.0870(11)
_cell_angle_alpha                       90
_cell_angle_beta                        90
_cell_angle_gamma                       90
_cell_volume                            6009.1(5)
_cell_formula_units_Z                   4
_cell_measurement_temperature           180
_cell_measurement_reflns_used           6700
_cell_measurement_theta_min             2.8356
_cell_measurement_theta_max             32.1417
_cell_measurement_wavelength            0.71073
 
#----------------------------------------------------------------------------#
#                   CRYSTAL INFORMATION                                      #
#----------------------------------------------------------------------------#
 
_exptl_crystal_description              block
_exptl_crystal_colour                   'dark red'
_exptl_crystal_size_max                 0.35
_exptl_crystal_size_mid                 0.2
_exptl_crystal_size_min                 0.17
_exptl_crystal_density_diffrn           1.59
_exptl_crystal_density_method           'not measured'
_exptl_crystal_F_000                    2924
_exptl_special_details
;
 ?
;
 
#----------------------------------------------------------------------------#
#                   ABSORPTION CORRECTION                                    #
#----------------------------------------------------------------------------#
 
_exptl_absorpt_coefficient_mu           1.827
_exptl_absorpt_correction_type          refdelf
_exptl_absorpt_process_details
;
        (See: Walker, N. & Stuart, D. (1983) Acta Cryst. A39, 158-166)
;
_exptl_absorpt_correction_T_min         0.528
_exptl_absorpt_correction_T_max         0.732
 
#----------------------------------------------------------------------------#
#                   DATA COLLECTION                                          #
#----------------------------------------------------------------------------#
 
_diffrn_ambient_temperature             180
_diffrn_radiation_type            MoK\a
_diffrn_radiation_source          'fine-focus sealed tube'
_diffrn_radiation_monochromator   graphite
_diffrn_measurement_device_type   'Oxford-Diffraction XCALIBUR'
_diffrn_measurement_method        \w-\f
_diffrn_detector_area_resol_mean  ?
_diffrn_standards_number          0
_diffrn_standards_interval_count  0
_diffrn_standards_interval_time   0
_diffrn_standards_decay_%         0
_diffrn_reflns_av_R_equivalents         0.0488
_diffrn_reflns_av_unetI/netI            0.0474
_diffrn_reflns_number                   43978
_diffrn_reflns_limit_h_min              -18
_diffrn_reflns_limit_h_max              19
_diffrn_reflns_limit_k_min              -19
_diffrn_reflns_limit_k_max              19
_diffrn_reflns_limit_l_min              -27
_diffrn_reflns_limit_l_max              29
_diffrn_reflns_theta_min                2.6
_diffrn_reflns_theta_max                25.68
_diffrn_reflns_theta_full               25.68
_diffrn_measured_fraction_theta_full
                                        0.994
_diffrn_measured_fraction_theta_max
                                        0.994
_reflns_number_total                    11349
_reflns_number_gt                       9506
_reflns_threshold_expression           >2\s(I)
                            
#----------------------------------------------------------------------------#
#                   COMPUTER PROGRAMS USED                                   #
#----------------------------------------------------------------------------#
 
_computing_data_collection              'CrysAlis CCD, Oxford Diffraction Ltd.'
_computing_cell_refinement              'CrysAlis RED, Oxford Diffraction Ltd.'
_computing_data_reduction               'CrysAlis RED, Oxford Diffraction Ltd.'
_computing_structure_solution           'SIR92 (Giacovazzo et al, 1993)'
_computing_structure_refinement         'SHELXL-97 (Sheldrick, 1997)'
_computing_molecular_graphics           'Ortep-3 for Windows (Farrugia, 1997)'
_computing_publication_material
                                   'WinGX publication routines (Farrugia, 1999)'
 
#----------------------------------------------------------------------------#
#                   REFINEMENT INFORMATION                                   #
#----------------------------------------------------------------------------#
 
_refine_special_details
;
 Refinement of F^2^ against ALL reflections.  The weighted R-factor wR and
 goodness of fit S are based on F^2^, conventional R-factors R are based
 on F, with F set to zero for negative F^2^. The threshold expression of
 F^2^ > 2sigma(F^2^) is used only for calculating R-factors(gt) etc. and is
 not relevant to the choice of reflections for refinement.  R-factors based
 on F^2^ are statistically about twice as large as those based on F, and R-
 factors based on ALL data will be even larger.
;
_refine_ls_structure_factor_coef        Fsqd
_refine_ls_matrix_type                  full
_refine_ls_weighting_scheme             calc
_refine_ls_weighting_details
         'calc w=1/[\s^2^(Fo^2^)+(0.0783P)^2^+0.0000P] where P=(Fo^2^+2Fc^2^)/3'
_atom_sites_solution_primary            direct
_atom_sites_solution_secondary          difmap
_atom_sites_solution_hydrogens          geom
_refine_ls_hydrogen_treatment           constr
_refine_ls_extinction_method            none
_refine_ls_number_reflns                11349
_refine_ls_number_parameters            767
_refine_ls_number_restraints            7
_refine_ls_R_factor_all                 0.0518
_refine_ls_R_factor_gt                  0.0401
_refine_ls_wR_factor_ref                0.1163
_refine_ls_wR_factor_gt                 0.1099
_refine_ls_goodness_of_fit_ref          1.051
_refine_ls_restrained_S_all             1.06
_refine_ls_shift/su_max                 0.002
_refine_ls_shift/su_mean                0
_refine_ls_abs_structure_details
                                    'Flack H D (1983), Acta Cryst. A39, 876-881'
_refine_ls_abs_structure_Flack          -0.012(9)
_refine_diff_density_max                2.059
_refine_diff_density_min                -1.215
_refine_diff_density_rms                0.12
 
#----------------------------------------------------------------------------#
#                   ATOMIC TYPES, COORDINATES AND THERMAL PARAMETERS         #
#----------------------------------------------------------------------------#
 
loop_
    _atom_type_symbol
    _atom_type_description
    _atom_type_scat_dispersion_real
    _atom_type_scat_dispersion_imag
    _atom_type_scat_source
C C 0.0033 0.0016 'International Tables Vol C Tables 4.2.6.8 and 6.1.1.4'
H H 0 0 'International Tables Vol C Tables 4.2.6.8 and 6.1.1.4'
N N 0.0061 0.0033 'International Tables Vol C Tables 4.2.6.8 and 6.1.1.4'
O O 0.0106 0.006 'International Tables Vol C Tables 4.2.6.8 and 6.1.1.4'
Fe Fe 0.3463 0.8444 'International Tables Vol C Tables 4.2.6.8 and 6.1.1.4'
Dy Dy -0.1892 4.4098 'International Tables Vol C Tables 4.2.6.8 and 6.1.1.4'
Cl Cl 0.1484 0.1585 'International Tables Vol C Tables 4.2.6.8 and 6.1.1.4'
 
loop_
    _atom_site_label
    _atom_site_type_symbol
    _atom_site_fract_x
    _atom_site_fract_y
    _atom_site_fract_z
    _atom_site_U_iso_or_equiv
    _atom_site_adp_type
    _atom_site_occupancy
    _atom_site_symmetry_multiplicity
    _atom_site_calc_flag
    _atom_site_refinement_flags
    _atom_site_disorder_assembly
    _atom_site_disorder_group
C1 C 0.5706(5) 0.8708(5) 0.7664(3) 0.0395(17) Uani 1 1 d . . .
H1A H 0.5576 0.8658 0.7271 0.047 Uiso 1 1 calc R . .
H1B H 0.5357 0.9159 0.7812 0.047 Uiso 1 1 calc R . .
C2 C 0.6169(5) 0.7219(5) 0.7855(3) 0.0434(18) Uani 1 1 d . . .
H2A H 0.5944 0.6658 0.7908 0.052 Uiso 1 1 calc R . .
H2B H 0.6347 0.7266 0.747 0.052 Uiso 1 1 calc R . .
C3 C 0.5315(4) 0.8004(5) 0.8579(3) 0.0391(17) Uani 1 1 d . . .
H3A H 0.4742 0.8218 0.8637 0.047 Uiso 1 1 calc R . .
H3B H 0.5357 0.747 0.877 0.047 Uiso 1 1 calc R . .
C4 C 0.5447(4) 0.7860(4) 0.7963(3) 0.0355(16) Uani 1 1 d . . .
C5 C 0.4600(5) 0.7562(6) 0.7687(3) 0.054(2) Uani 1 1 d . . .
H5A H 0.4353 0.712 0.7905 0.08 Uiso 1 1 calc R . .
H5B H 0.4718 0.7359 0.732 0.08 Uiso 1 1 calc R . .
H5C H 0.4208 0.8024 0.7666 0.08 Uiso 1 1 calc R . .
C6 C 1.2573(5) 1.0000(4) 0.9904(3) 0.0401(17) Uani 1 1 d . . .
H6A H 1.3148 0.9896 0.977 0.048 Uiso 1 1 calc R . .
H6B H 1.2518 0.9743 1.0267 0.048 Uiso 1 1 calc R . .
C7 C 1.1740(5) 1.1168(5) 1.0373(3) 0.0437(18) Uani 1 1 d . . .
H7A H 1.1972 1.112 1.0745 0.052 Uiso 1 1 calc R . .
H7B H 1.156 1.1744 1.0319 0.052 Uiso 1 1 calc R . .
C8 C 1.2240(4) 1.1346(4) 0.9388(3) 0.0365(16) Uani 1 1 d . . .
H8A H 1.2413 1.1931 0.9393 0.044 Uiso 1 1 calc R . .
H8B H 1.258 1.1062 0.9109 0.044 Uiso 1 1 calc R . .
C9 C 1.2430(4) 1.0956(4) 0.9956(3) 0.0309(15) Uani 1 1 d . . .
C10 C 1.3282(5) 1.1353(5) 1.0176(3) 0.0447(18) Uani 1 1 d . . .
H10A H 1.348 1.104 1.0491 0.067 Uiso 1 1 calc R . .
H10B H 1.318 1.1925 1.0284 0.067 Uiso 1 1 calc R . .
H10C H 1.3706 1.1338 0.9888 0.067 Uiso 1 1 calc R . .
C11 C 0.6968(4) 0.9104(4) 0.7260(3) 0.0307(15) Uani 1 1 d . . .
H11 H 0.665 0.9036 0.6937 0.037 Uiso 1 1 calc R . .
C12 C 0.7827(4) 0.9382(5) 0.7191(2) 0.0307(13) Uani 1 1 d . . .
C13 C 0.8068(4) 0.9630(4) 0.6653(3) 0.0333(15) Uani 1 1 d . . .
H13 H 0.7686 0.9562 0.6361 0.04 Uiso 1 1 calc R . .
C14 C 0.8862(4) 0.9974(4) 0.6551(3) 0.0353(15) Uani 1 1 d . . .
H14 H 0.9016 1.0118 0.619 0.042 Uiso 1 1 calc R . .
C15 C 0.9424(4) 1.0102(4) 0.6978(3) 0.0327(15) Uani 1 1 d . . .
H15 H 0.9954 1.0347 0.691 0.039 Uiso 1 1 calc R . .
C16 C 0.9198(4) 0.9864(4) 0.7514(3) 0.0296(14) Uani 1 1 d . . .
C17 C 0.8408(4) 0.9500(4) 0.7632(2) 0.0243(13) Uani 1 1 d . . .
C18 C 1.0570(4) 1.0307(5) 0.7875(3) 0.0385(17) Uani 1 1 d . . .
H18A H 1.085 0.9971 0.7599 0.058 Uiso 1 1 calc R . .
H18B H 1.0894 1.0293 0.8213 0.058 Uiso 1 1 calc R . .
H18C H 1.0527 1.0875 0.7746 0.058 Uiso 1 1 calc R . .
C19 C 0.7254(5) 0.6647(4) 0.8373(3) 0.0368(16) Uani 1 1 d . . .
H19 H 0.6982 0.6154 0.8267 0.044 Uiso 1 1 calc R . .
C20 C 0.8039(4) 0.6557(4) 0.8715(3) 0.0298(14) Uani 1 1 d . . .
C21 C 0.8373(4) 0.5746(4) 0.8773(3) 0.0356(15) Uani 1 1 d . . .
H21 H 0.8096 0.5295 0.8605 0.043 Uiso 1 1 calc R . .
C23 C 0.9101(5) 0.5610(4) 0.9073(3) 0.0456(18) Uani 1 1 d . . .
H23 H 0.9307 0.5066 0.9115 0.055 Uiso 1 1 calc R . .
C24 C 0.9544(4) 0.6286(4) 0.9321(3) 0.0341(15) Uani 1 1 d . . .
H24 H 1.0048 0.6193 0.9516 0.041 Uiso 1 1 calc R . .
C25 C 0.9221(4) 0.7074(4) 0.9268(3) 0.0288(14) Uani 1 1 d . . .
C26 C 0.8453(4) 0.7252(4) 0.8957(3) 0.0285(14) Uani 1 1 d . . .
C27 C 1.0357(5) 0.7676(5) 0.9798(3) 0.0399(17) Uani 1 1 d . . .
H27A H 1.0218 0.737 1.0129 0.06 Uiso 1 1 calc R . .
H27B H 1.059 0.8213 0.9897 0.06 Uiso 1 1 calc R . .
H27C H 1.0771 0.7367 0.9586 0.06 Uiso 1 1 calc R . .
C28 C 0.5595(4) 0.9166(4) 0.9130(3) 0.0345(16) Uani 1 1 d . . .
H28 H 0.5002 0.9179 0.9154 0.041 Uiso 1 1 calc R . .
C29 C 0.6056(4) 0.9812(4) 0.9444(3) 0.0334(14) Uani 1 1 d . . .
C30 C 0.5519(5) 1.0349(4) 0.9775(3) 0.0391(17) Uani 1 1 d . . .
H30 H 0.4928 1.0287 0.9773 0.047 Uiso 1 1 calc R . .
C31 C 0.5912(5) 1.0962(5) 1.0098(3) 0.0461(19) Uani 1 1 d . . .
H31 H 0.5575 1.1327 1.0305 0.055 Uiso 1 1 calc R . .
C32 C 0.6768(5) 1.1041(5) 1.0117(3) 0.0411(17) Uani 1 1 d . . .
H32 H 0.7018 1.1434 1.0351 0.049 Uiso 1 1 calc R . .
C33 C 0.7281(4) 1.0533(4) 0.9785(3) 0.0325(15) Uani 1 1 d . . .
C34 C 0.6944(4) 0.9918(4) 0.9440(3) 0.0288(15) Uani 1 1 d . . .
C35 C 0.8591(4) 1.1186(4) 1.0116(3) 0.0355(16) Uani 1 1 d . . .
H35A H 0.8366 1.1729 1.0024 0.053 Uiso 1 1 calc R . .
H35B H 0.9194 1.1177 1.0046 0.053 Uiso 1 1 calc R . .
H35C H 0.8488 1.1071 1.0502 0.053 Uiso 1 1 calc R . .
C36 C 1.2273(4) 0.9080(4) 0.9191(3) 0.0313(15) Uani 1 1 d . . .
H36 H 1.286 0.8995 0.9212 0.038 Uiso 1 1 calc R . .
C37 C 1.1809(4) 0.8581(4) 0.8780(2) 0.0277(13) Uani 1 1 d . . .
C38 C 1.2306(4) 0.7972(4) 0.8479(3) 0.0335(15) Uani 1 1 d . . .
H38 H 1.2894 0.7949 0.8534 0.04 Uiso 1 1 calc R . .
C39 C 1.1947(4) 0.7441(4) 0.8123(3) 0.0369(16) Uani 1 1 d . . .
H39 H 1.2281 0.7043 0.7942 0.044 Uiso 1 1 calc R . .
C40 C 1.1072(5) 0.7477(4) 0.8018(3) 0.0349(15) Uani 1 1 d . . .
H40 H 1.0823 0.711 0.7765 0.042 Uiso 1 1 calc R . .
C41 C 1.0569(4) 0.8069(4) 0.8296(2) 0.0276(14) Uani 1 1 d . . .
C42 C 1.0920(4) 0.8627(4) 0.8677(2) 0.0268(14) Uani 1 1 d . . .
C43 C 0.9300(5) 0.7644(4) 0.7822(3) 0.0344(15) Uani 1 1 d . . .
H43A H 0.953 0.7777 0.7463 0.052 Uiso 1 1 calc R . .
H43B H 0.8695 0.7746 0.7822 0.052 Uiso 1 1 calc R . .
H43C H 0.9406 0.7064 0.7904 0.052 Uiso 1 1 calc R . .
C44 C 1.0689(5) 1.0293(4) 1.0772(3) 0.0360(16) Uani 1 1 d . . .
H44 H 1.0997 1.0418 1.1091 0.043 Uiso 1 1 calc R . .
C45 C 0.9943(4) 0.9778(4) 1.0843(3) 0.0313(15) Uani 1 1 d . . .
C46 C 0.9635(5) 0.9644(4) 1.1394(3) 0.0431(18) Uani 1 1 d . . .
H46 H 0.9953 0.9842 1.1693 0.052 Uiso 1 1 calc R . .
C47 C 0.8884(5) 0.9233(4) 1.1493(3) 0.0402(16) Uani 1 1 d . . .
H47 H 0.8692 0.9161 1.1855 0.048 Uiso 1 1 calc R . .
C48 C 0.8411(5) 0.8924(4) 1.1053(3) 0.0377(16) Uani 1 1 d . . .
H48 H 0.7899 0.8647 1.1123 0.045 Uiso 1 1 calc R . .
C49 C 0.8678(4) 0.9019(4) 1.0522(3) 0.0329(15) Uani 1 1 d . . .
C50 C 0.9457(4) 0.9455(4) 1.0398(2) 0.0292(14) Uani 1 1 d . . .
C51 C 0.7523(5) 0.8262(5) 1.0150(3) 0.0435(18) Uani 1 1 d . . .
H51A H 0.7659 0.7791 1.0383 0.065 Uiso 1 1 calc R . .
H51B H 0.7304 0.8064 0.9802 0.065 Uiso 1 1 calc R . .
H51C H 0.71 0.8604 1.0329 0.065 Uiso 1 1 calc R . .
C52 C 1.0998(4) 1.1953(3) 0.9048(2) 0.0302(13) Uani 1 1 d . . .
H52 H 1.1345 1.2426 0.9039 0.036 Uiso 1 1 calc R . .
C53 C 1.0136(4) 1.2072(4) 0.8851(2) 0.0281(14) Uani 1 1 d . . .
C54 C 0.9910(5) 1.2867(4) 0.8645(3) 0.0338(16) Uani 1 1 d . . .
H54 H 1.0314 1.3296 0.865 0.041 Uiso 1 1 calc R . .
C55 C 0.9115(5) 1.3028(4) 0.8437(3) 0.0385(17) Uani 1 1 d . . .
H55 H 0.8981 1.3563 0.8309 0.046 Uiso 1 1 calc R . .
C56 C 0.8497(4) 1.2389(4) 0.8416(3) 0.0325(15) Uani 1 1 d . . .
H56 H 0.7958 1.2499 0.8271 0.039 Uiso 1 1 calc R . .
C57 C 0.8690(4) 1.1604(4) 0.8609(2) 0.0268(14) Uani 1 1 d . . .
C58 C 0.9511(4) 1.1417(4) 0.8849(2) 0.0267(13) Uani 1 1 d . . .
C59 C 0.7367(4) 1.1053(5) 0.8327(3) 0.0380(17) Uani 1 1 d . . .
H59A H 0.7014 1.14 0.8559 0.057 Uiso 1 1 calc R . .
H59B H 0.7093 1.0521 0.8271 0.057 Uiso 1 1 calc R . .
H59C H 0.7452 1.1323 0.7975 0.057 Uiso 1 1 calc R . .
C100 C 0.4894(9) 0.2544(8) 0.8971(5) 0.105(4) Uani 1 1 d . . .
H10D H 0.5279 0.2776 0.8702 0.157 Uiso 1 1 calc R . .
H10E H 0.5064 0.198 0.9058 0.157 Uiso 1 1 calc R . .
H10F H 0.4909 0.2878 0.9302 0.157 Uiso 1 1 calc R . .
N1 N 0.6579(3) 0.8935(3) 0.7721(2) 0.0310(12) Uani 1 1 d . . .
N2 N 0.6917(4) 0.7326(4) 0.8211(2) 0.0386(14) Uani 1 1 d . . .
N3 N 0.5918(3) 0.8583(4) 0.8825(2) 0.0330(12) Uani 1 1 d . . .
N4 N 1.1956(3) 0.9617(3) 0.9521(2) 0.0296(12) Uani 1 1 d . . .
N5 N 1.0974(3) 1.0595(3) 1.0319(2) 0.0342(12) Uani 1 1 d . . .
N6 N 1.1342(3) 1.1299(3) 0.9229(2) 0.0303(12) Uani 1 1 d . . .
O1 O 0.8236(3) 0.9255(3) 0.81482(16) 0.0290(9) Uani 1 1 d . . .
O2 O 0.8198(3) 0.8035(2) 0.89190(17) 0.0288(9) Uani 1 1 d . . .
O3 O 0.7446(3) 0.9464(3) 0.91160(16) 0.0302(10) Uani 1 1 d . . .
O4 O 1.0436(2) 0.9176(2) 0.89380(17) 0.0264(9) Uani 1 1 d . . .
O5 O 0.9688(3) 0.9538(3) 0.98736(17) 0.0300(10) Uani 1 1 d . . .
O6 O 0.9649(2) 1.0661(3) 0.90502(16) 0.0268(8) Uani 1 1 d . . .
O7 O 0.9727(3) 0.9979(3) 0.79757(18) 0.0343(10) Uani 1 1 d . . .
O8 O 0.9605(3) 0.7792(3) 0.94746(18) 0.0311(10) Uani 1 1 d . . .
O9 O 0.8171(3) 1.0547(3) 0.97760(17) 0.0315(10) Uani 1 1 d . . .
O10 O 0.9702(3) 0.8163(3) 0.82367(17) 0.0274(9) Uani 1 1 d . . .
O11 O 0.8267(3) 0.8741(3) 1.00570(18) 0.0333(10) Uani 1 1 d . . .
O12 O 0.8153(3) 1.0930(3) 0.85838(19) 0.0348(11) Uani 1 1 d . . .
O24 O 0.4063(7) 0.2539(5) 0.8755(4) 0.110(3) Uani 1 1 d . . .
H24A H 0.3989 0.211 0.8574 0.165 Uiso 1 1 calc R . .
Fe1 Fe 0.71843(6) 0.85858(6) 0.84821(4) 0.0260(2) Uani 1 1 d . . .
Fe2 Fe 1.07042(6) 1.01631(5) 0.94954(4) 0.0253(2) Uani 1 1 d . . .
Dy1 Dy 0.893934(18) 0.934175(18) 0.901769(12) 0.02739(9) Uani 1 1 d . . .
Cl1 Cl 0.3874(2) 0.03539(17) 0.81525(13) 0.0854(8) Uani 1 1 d D . .
O23 O 0.3823(8) -0.0435(6) 0.8411(5) 0.172(3) Uani 1 1 d D . .
O20 O 0.3192(6) 0.0907(6) 0.8155(5) 0.172(3) Uani 1 1 d D . .
O22 O 0.4637(5) 0.0785(7) 0.8159(5) 0.172(3) Uani 1 1 d D . .
O21 O 0.3851(7) 0.0154(7) 0.7536(3) 0.172(3) Uani 1 1 d D . .
 
loop_
    _atom_site_aniso_label
    _atom_site_aniso_U_11
    _atom_site_aniso_U_22
    _atom_site_aniso_U_33
    _atom_site_aniso_U_23
    _atom_site_aniso_U_13
    _atom_site_aniso_U_12
C1 0.038(4) 0.042(4) 0.038(4) 0.007(3) 0.001(3) -0.001(3)
C2 0.048(5) 0.039(4) 0.043(4) -0.003(3) -0.007(4) -0.017(4)
C3 0.030(4) 0.047(4) 0.040(4) 0.013(3) 0.003(3) -0.012(3)
C4 0.028(4) 0.040(4) 0.038(4) -0.003(3) -0.004(3) -0.013(3)
C5 0.049(5) 0.058(5) 0.054(5) -0.003(4) -0.002(4) -0.017(4)
C6 0.036(4) 0.031(4) 0.054(5) -0.004(3) -0.013(3) 0.008(3)
C7 0.040(4) 0.039(4) 0.052(5) -0.001(3) -0.017(4) -0.014(3)
C8 0.031(4) 0.032(4) 0.046(4) 0.000(3) -0.003(3) -0.012(3)
C9 0.022(3) 0.026(3) 0.046(4) -0.007(3) -0.005(3) -0.003(2)
C10 0.040(4) 0.038(4) 0.057(5) -0.004(4) -0.015(4) -0.005(3)
C11 0.032(4) 0.033(4) 0.028(3) 0.001(3) -0.002(3) -0.005(3)
C12 0.028(3) 0.033(3) 0.031(3) 0.000(3) 0.006(3) -0.001(3)
C13 0.032(4) 0.045(4) 0.023(3) 0.004(3) -0.003(3) -0.004(3)
C14 0.038(4) 0.044(4) 0.023(3) 0.007(3) 0.005(3) 0.001(3)
C15 0.038(4) 0.034(4) 0.026(3) 0.012(3) 0.005(3) -0.001(3)
C16 0.034(4) 0.029(3) 0.026(3) 0.002(3) 0.001(3) 0.000(3)
C17 0.028(3) 0.025(3) 0.020(3) -0.004(2) 0.001(2) 0.001(2)
C18 0.032(4) 0.045(4) 0.039(4) 0.008(3) 0.003(3) -0.008(3)
C19 0.048(4) 0.028(4) 0.034(4) -0.006(3) 0.007(3) -0.009(3)
C20 0.031(4) 0.025(3) 0.033(3) 0.005(3) 0.007(3) -0.003(3)
C21 0.040(4) 0.031(4) 0.035(3) -0.008(3) 0.010(3) -0.010(3)
C23 0.060(5) 0.023(3) 0.055(4) 0.009(4) 0.026(4) 0.013(3)
C24 0.038(4) 0.028(4) 0.037(4) 0.007(3) 0.014(3) 0.007(3)
C25 0.035(3) 0.024(3) 0.028(3) 0.002(3) 0.005(3) 0.004(3)
C26 0.038(4) 0.020(3) 0.028(3) 0.003(3) 0.012(3) -0.002(2)
C27 0.042(4) 0.042(4) 0.035(4) 0.003(3) -0.012(3) 0.003(3)
C28 0.024(3) 0.047(4) 0.033(4) 0.007(3) 0.007(3) -0.008(3)
C29 0.031(3) 0.039(4) 0.029(3) 0.007(3) 0.002(3) 0.000(3)
C30 0.041(4) 0.046(4) 0.029(4) -0.003(3) 0.013(3) 0.004(3)
C31 0.052(5) 0.052(5) 0.034(4) -0.010(3) 0.007(3) 0.019(4)
C32 0.055(5) 0.038(4) 0.030(4) -0.011(3) 0.002(3) 0.009(3)
C33 0.037(4) 0.035(4) 0.026(3) 0.005(3) 0.003(3) 0.013(3)
C34 0.034(4) 0.028(3) 0.025(3) 0.011(3) 0.012(3) 0.016(3)
C35 0.037(4) 0.035(4) 0.034(4) -0.006(3) -0.001(3) -0.002(3)
C36 0.031(4) 0.033(4) 0.030(3) 0.007(3) 0.002(3) -0.001(3)
C37 0.029(3) 0.028(3) 0.026(3) -0.001(3) -0.003(3) -0.005(3)
C38 0.030(4) 0.035(4) 0.035(4) 0.002(3) 0.011(3) 0.010(3)
C39 0.035(4) 0.039(4) 0.037(4) -0.006(3) 0.006(3) 0.014(3)
C40 0.037(4) 0.030(3) 0.037(4) -0.010(3) -0.001(3) 0.008(3)
C41 0.032(4) 0.031(4) 0.019(3) -0.002(3) 0.009(3) -0.001(3)
C42 0.033(4) 0.021(3) 0.026(3) 0.003(2) 0.020(3) 0.007(3)
C43 0.044(4) 0.031(4) 0.028(3) -0.010(3) 0.003(3) -0.008(3)
C44 0.046(4) 0.037(4) 0.025(3) -0.002(3) -0.008(3) 0.006(3)
C45 0.037(4) 0.028(3) 0.028(4) 0.003(3) 0.000(3) 0.002(3)
C46 0.065(5) 0.038(4) 0.027(4) -0.007(3) -0.010(3) 0.015(4)
C47 0.055(4) 0.038(4) 0.028(3) 0.008(3) 0.006(3) -0.002(4)
C48 0.051(4) 0.034(4) 0.028(4) 0.009(3) 0.012(3) 0.001(3)
C49 0.038(4) 0.031(3) 0.030(3) 0.000(3) -0.001(3) 0.004(3)
C50 0.044(4) 0.024(3) 0.020(3) 0.002(3) 0.006(3) 0.012(3)
C51 0.049(4) 0.037(4) 0.044(4) 0.008(3) 0.006(3) -0.015(3)
C52 0.044(4) 0.019(3) 0.028(3) 0.000(3) 0.000(3) -0.009(3)
C53 0.037(4) 0.022(3) 0.025(3) -0.002(2) -0.003(3) 0.001(3)
C54 0.053(4) 0.024(3) 0.025(3) 0.002(3) -0.001(3) -0.006(3)
C55 0.054(5) 0.023(3) 0.038(4) 0.005(3) -0.011(3) 0.004(3)
C56 0.037(4) 0.029(4) 0.031(4) 0.002(3) -0.004(3) 0.003(3)
C57 0.037(4) 0.023(3) 0.020(3) -0.003(2) 0.002(3) -0.001(3)
C58 0.032(3) 0.026(3) 0.021(3) -0.005(2) 0.003(2) 0.001(3)
C59 0.029(4) 0.044(4) 0.042(4) 0.001(3) -0.002(3) 0.006(3)
C100 0.134(11) 0.087(8) 0.093(9) 0.000(7) -0.048(9) -0.039(8)
N1 0.027(3) 0.036(3) 0.030(3) -0.002(2) -0.002(2) -0.005(2)
N2 0.039(3) 0.035(3) 0.041(3) 0.000(3) -0.006(3) -0.006(3)
N3 0.031(3) 0.041(3) 0.027(3) 0.003(2) -0.001(2) -0.006(3)
N4 0.025(3) 0.027(3) 0.037(3) -0.001(2) -0.006(2) 0.000(2)
N5 0.040(3) 0.031(3) 0.032(3) -0.004(2) -0.005(2) -0.007(3)
N6 0.027(3) 0.031(3) 0.033(3) -0.001(2) -0.001(2) -0.004(2)
O1 0.033(2) 0.033(2) 0.021(2) 0.0068(19) 0.0023(17) -0.004(2)
O2 0.031(2) 0.024(2) 0.031(2) 0.0028(18) -0.0042(19) 0.0030(18)
O3 0.034(2) 0.026(2) 0.030(2) 0.0014(19) 0.0036(18) 0.0025(18)
O4 0.025(2) 0.025(2) 0.029(2) -0.0014(18) 0.0017(18) 0.0009(16)
O5 0.037(2) 0.028(3) 0.025(2) -0.0001(17) 0.0023(18) -0.0004(19)
O6 0.031(2) 0.022(2) 0.027(2) 0.004(2) -0.0033(18) 0.0035(18)
O7 0.032(2) 0.042(3) 0.029(2) 0.004(2) -0.005(2) -0.011(2)
O8 0.033(2) 0.024(2) 0.037(3) 0.0022(19) -0.001(2) 0.0027(18)
O9 0.036(2) 0.026(2) 0.033(2) -0.0073(19) 0.0016(19) 0.002(2)
O10 0.025(2) 0.029(2) 0.028(2) -0.0057(18) -0.0024(18) -0.0001(18)
O11 0.033(2) 0.035(3) 0.032(2) 0.003(2) 0.005(2) -0.004(2)
O12 0.036(3) 0.033(3) 0.035(3) 0.0066(19) -0.009(2) -0.006(2)
O24 0.133(8) 0.091(6) 0.106(7) -0.009(5) 0.007(6) -0.011(6)
Fe1 0.0290(5) 0.0255(5) 0.0235(4) 0.0017(4) 0.0012(4) -0.0028(4)
Fe2 0.0285(5) 0.0221(4) 0.0254(4) -0.0007(4) -0.0022(4) 0.0003(4)
Dy1 0.02717(14) 0.02670(14) 0.02830(14) -0.00079(13) -0.00107(13) -0.00163(13)
Cl1 0.0843(18) 0.0678(16) 0.104(2) 0.0039(14) 0.0321(17) 0.0098(14)
O23 0.161(6) 0.157(5) 0.196(6) 0.078(5) 0.059(5) 0.029(5)
O20 0.161(6) 0.157(5) 0.196(6) 0.078(5) 0.059(5) 0.029(5)
O22 0.161(6) 0.157(5) 0.196(6) 0.078(5) 0.059(5) 0.029(5)
O21 0.161(6) 0.157(5) 0.196(6) 0.078(5) 0.059(5) 0.029(5)
 
 
#----------------------------------------------------------------------------#
#                   MOLECULAR GEOMETRY                                       #
#----------------------------------------------------------------------------#
 
_geom_special_details
;
 All esds (except the esd in the dihedral angle between two l.s. planes)
 are estimated using the full covariance matrix.  The cell esds are taken
 into account individually in the estimation of esds in distances, angles
 and torsion angles; correlations between esds in cell parameters are only
 used when they are defined by crystal symmetry.  An approximate (isotropic)
 treatment of cell esds is used for estimating esds involving l.s. planes.
;
loop_
    _geom_bond_atom_site_label_1
    _geom_bond_atom_site_label_2
    _geom_bond_distance
    _geom_bond_site_symmetry_2
    _geom_bond_publ_flag
C1 N1 1.420(9) . ?
C1 C4 1.585(10) . ?
C2 N2 1.461(9) . ?
C2 C4 1.546(10) . ?
C3 N3 1.447(9) . ?
C3 C4 1.514(10) . ?
C4 C5 1.558(10) . ?
C6 N4 1.469(8) . ?
C6 C9 1.545(9) . ?
C7 N5 1.513(8) . ?
C7 C9 1.513(10) . ?
C8 N6 1.459(8) . ?
C8 C9 1.532(9) . ?
C9 C10 1.567(9) . ?
C11 N1 1.296(8) . ?
C11 C12 1.425(9) . ?
C12 C13 1.406(9) . ?
C12 C17 1.412(8) . ?
C13 C14 1.381(9) . ?
C14 C15 1.369(9) . ?
C15 C16 1.391(8) . ?
C16 C17 1.396(9) . ?
C16 O7 1.400(7) . ?
C17 O1 1.329(7) . ?
C18 O7 1.439(8) . ?
C19 N2 1.264(9) . ?
C19 C20 1.487(10) . ?
C20 C21 1.401(10) . ?
C20 C26 1.410(9) . ?
C21 C23 1.367(10) . ?
C23 C24 1.413(10) . ?
C24 C25 1.359(9) . ?
C25 O8 1.386(8) . ?
C25 C26 1.444(9) . ?
C26 O2 1.315(7) . ?
C27 O8 1.424(8) . ?
C28 N3 1.289(8) . ?
C28 C29 1.467(9) . ?
C29 C34 1.401(9) . ?
C29 C30 1.439(9) . ?
C30 C31 1.393(10) . ?
C31 C32 1.347(11) . ?
C32 C33 1.392(9) . ?
C33 C34 1.387(10) . ?
C33 O9 1.395(8) . ?
C34 O3 1.324(7) . ?
C35 O9 1.462(8) . ?
C36 N4 1.269(8) . ?
C36 C37 1.461(9) . ?
C37 C42 1.416(9) . ?
C37 C38 1.441(9) . ?
C38 C39 1.329(10) . ?
C39 C40 1.394(10) . ?
C40 C41 1.398(9) . ?
C41 O10 1.372(8) . ?
C41 C42 1.391(9) . ?
C42 O4 1.317(7) . ?
C43 O10 1.441(7) . ?
C44 N5 1.273(8) . ?
C44 C45 1.437(10) . ?
C45 C50 1.412(9) . ?
C45 C46 1.427(10) . ?
C46 C47 1.367(11) . ?
C47 C48 1.384(10) . ?
C48 C49 1.354(9) . ?
C49 O11 1.367(8) . ?
C49 C50 1.435(9) . ?
C50 O5 1.320(7) . ?
C51 O11 1.410(8) . ?
C52 N6 1.252(8) . ?
C52 C53 1.442(9) . ?
C53 C54 1.407(9) . ?
C53 C58 1.430(9) . ?
C54 C55 1.366(10) . ?
C55 C56 1.406(10) . ?
C56 C57 1.367(9) . ?
C57 O12 1.367(7) . ?
C57 C58 1.442(9) . ?
C58 O6 1.316(7) . ?
C59 O12 1.390(8) . ?
C100 O24 1.401(13) . ?
N1 Fe1 2.137(5) . ?
N2 Fe1 2.153(6) . ?
N3 Fe1 2.146(5) . ?
N4 Fe2 2.146(5) . ?
N5 Fe2 2.142(5) . ?
N6 Fe2 2.164(5) . ?
O1 Fe1 2.121(4) . ?
O1 Dy1 2.370(4) . ?
O2 Fe1 2.096(4) . ?
O2 Dy1 2.395(4) . ?
O3 Fe1 2.111(4) . ?
O3 Dy1 2.358(4) . ?
O4 Fe2 2.111(4) . ?
O4 Dy1 2.365(4) . ?
O5 Fe2 2.087(4) . ?
O5 Dy1 2.392(4) . ?
O6 Fe2 2.123(4) . ?
O6 Dy1 2.379(4) . ?
O8 Dy1 2.897(4) . ?
O11 Dy1 2.880(4) . ?
Fe1 Dy1 3.2656(9) . ?
Fe2 Dy1 3.2665(9) . ?
Cl1 O22 1.378(7) . ?
Cl1 O20 1.385(7) . ?
Cl1 O23 1.405(8) . ?
Cl1 O21 1.520(7) . ?
 
loop_
    _geom_angle_atom_site_label_1
    _geom_angle_atom_site_label_2
    _geom_angle_atom_site_label_3
    _geom_angle
    _geom_angle_site_symmetry_1
    _geom_angle_site_symmetry_3
    _geom_angle_publ_flag
N1 C1 C4 114.7(6) . . ?
N2 C2 C4 114.2(6) . . ?
N3 C3 C4 114.0(5) . . ?
C3 C4 C2 111.5(6) . . ?
C3 C4 C5 110.4(6) . . ?
C2 C4 C5 110.4(6) . . ?
C3 C4 C1 110.6(6) . . ?
C2 C4 C1 107.4(5) . . ?
C5 C4 C1 106.4(6) . . ?
N4 C6 C9 111.5(5) . . ?
N5 C7 C9 112.0(6) . . ?
N6 C8 C9 113.6(5) . . ?
C7 C9 C8 111.3(6) . . ?
C7 C9 C6 112.1(6) . . ?
C8 C9 C6 110.8(6) . . ?
C7 C9 C10 107.0(6) . . ?
C8 C9 C10 107.7(6) . . ?
C6 C9 C10 107.6(5) . . ?
N1 C11 C12 127.4(6) . . ?
C13 C12 C17 118.9(6) . . ?
C13 C12 C11 116.6(6) . . ?
C17 C12 C11 124.1(5) . . ?
C14 C13 C12 121.2(6) . . ?
C15 C14 C13 120.3(6) . . ?
C14 C15 C16 119.5(6) . . ?
C15 C16 C17 122.0(6) . . ?
C15 C16 O7 123.4(6) . . ?
C17 C16 O7 114.6(5) . . ?
O1 C17 C16 119.5(5) . . ?
O1 C17 C12 122.4(5) . . ?
C16 C17 C12 118.1(5) . . ?
N2 C19 C20 126.8(6) . . ?
C21 C20 C26 120.8(6) . . ?
C21 C20 C19 116.9(6) . . ?
C26 C20 C19 122.2(6) . . ?
C23 C21 C20 120.6(6) . . ?
C21 C23 C24 120.8(6) . . ?
C25 C24 C23 118.8(7) . . ?
C24 C25 O8 124.7(6) . . ?
C24 C25 C26 122.6(6) . . ?
O8 C25 C26 112.6(5) . . ?
O2 C26 C20 125.3(6) . . ?
O2 C26 C25 118.4(5) . . ?
C20 C26 C25 116.3(5) . . ?
N3 C28 C29 127.4(6) . . ?
C34 C29 C30 120.8(6) . . ?
C34 C29 C28 124.7(6) . . ?
C30 C29 C28 114.5(6) . . ?
C31 C30 C29 117.9(7) . . ?
C32 C31 C30 121.6(6) . . ?
C31 C32 C33 120.0(7) . . ?
C34 C33 C32 122.4(7) . . ?
C34 C33 O9 112.5(5) . . ?
C32 C33 O9 125.1(6) . . ?
O3 C34 C33 120.9(6) . . ?
O3 C34 C29 121.8(6) . . ?
C33 C34 C29 117.3(6) . . ?
N4 C36 C37 126.7(6) . . ?
C42 C37 C38 118.5(6) . . ?
C42 C37 C36 125.4(6) . . ?
C38 C37 C36 116.1(6) . . ?
C39 C38 C37 121.7(6) . . ?
C38 C39 C40 120.4(6) . . ?
C39 C40 C41 119.7(6) . . ?
O10 C41 C42 112.9(5) . . ?
O10 C41 C40 125.5(6) . . ?
C42 C41 C40 121.6(6) . . ?
O4 C42 C41 120.8(6) . . ?
O4 C42 C37 121.0(6) . . ?
C41 C42 C37 118.2(5) . . ?
N5 C44 C45 127.1(6) . . ?
C50 C45 C46 118.0(6) . . ?
C50 C45 C44 123.7(6) . . ?
C46 C45 C44 118.1(6) . . ?
C47 C46 C45 121.6(6) . . ?
C46 C47 C48 119.9(6) . . ?
C49 C48 C47 121.1(7) . . ?
C48 C49 O11 126.3(6) . . ?
C48 C49 C50 120.9(6) . . ?
O11 C49 C50 112.8(5) . . ?
O5 C50 C45 122.9(6) . . ?
O5 C50 C49 118.7(6) . . ?
C45 C50 C49 118.4(5) . . ?
N6 C52 C53 128.8(6) . . ?
C54 C53 C58 119.0(6) . . ?
C54 C53 C52 118.0(6) . . ?
C58 C53 C52 123.0(5) . . ?
C55 C54 C53 121.8(6) . . ?
C54 C55 C56 120.3(6) . . ?
C57 C56 C55 119.8(6) . . ?
O12 C57 C56 124.6(6) . . ?
O12 C57 C58 113.8(5) . . ?
C56 C57 C58 121.6(6) . . ?
O6 C58 C53 123.7(5) . . ?
O6 C58 C57 118.9(5) . . ?
C53 C58 C57 117.4(5) . . ?
C11 N1 C1 114.9(6) . . ?
C11 N1 Fe1 125.6(4) . . ?
C1 N1 Fe1 116.4(4) . . ?
C19 N2 C2 114.6(6) . . ?
C19 N2 Fe1 128.5(5) . . ?
C2 N2 Fe1 116.3(4) . . ?
C28 N3 C3 115.9(6) . . ?
C28 N3 Fe1 125.5(4) . . ?
C3 N3 Fe1 116.6(4) . . ?
C36 N4 C6 114.7(6) . . ?
C36 N4 Fe2 127.8(5) . . ?
C6 N4 Fe2 116.7(4) . . ?
C44 N5 C7 115.6(6) . . ?
C44 N5 Fe2 127.1(5) . . ?
C7 N5 Fe2 115.4(4) . . ?
C52 N6 C8 117.6(6) . . ?
C52 N6 Fe2 127.0(4) . . ?
C8 N6 Fe2 114.2(4) . . ?
C17 O1 Fe1 131.2(4) . . ?
C17 O1 Dy1 135.7(4) . . ?
Fe1 O1 Dy1 93.13(14) . . ?
C26 O2 Fe1 131.5(4) . . ?
C26 O2 Dy1 132.2(4) . . ?
Fe1 O2 Dy1 93.04(15) . . ?
C34 O3 Fe1 132.4(4) . . ?
C34 O3 Dy1 133.9(4) . . ?
Fe1 O3 Dy1 93.72(15) . . ?
C42 O4 Fe2 133.2(4) . . ?
C42 O4 Dy1 133.1(4) . . ?
Fe2 O4 Dy1 93.56(15) . . ?
C50 O5 Fe2 132.3(4) . . ?
C50 O5 Dy1 132.7(4) . . ?
Fe2 O5 Dy1 93.42(15) . . ?
C58 O6 Fe2 130.9(4) . . ?
C58 O6 Dy1 136.1(4) . . ?
Fe2 O6 Dy1 92.84(15) . . ?
C16 O7 C18 117.2(5) . . ?
C25 O8 C27 116.6(5) . . ?
C25 O8 Dy1 114.3(3) . . ?
C27 O8 Dy1 128.0(4) . . ?
C33 O9 C35 116.9(5) . . ?
C41 O10 C43 116.2(5) . . ?
C49 O11 C51 115.8(5) . . ?
C49 O11 Dy1 115.6(4) . . ?
C51 O11 Dy1 128.3(4) . . ?
C57 O12 C59 116.9(5) . . ?
O2 Fe1 O3 76.56(16) . . ?
O2 Fe1 O1 79.23(16) . . ?
O3 Fe1 O1 77.89(16) . . ?
O2 Fe1 N1 151.06(19) . . ?
O3 Fe1 N1 122.26(19) . . ?
O1 Fe1 N1 83.58(18) . . ?
O2 Fe1 N3 120.32(18) . . ?
O3 Fe1 N3 84.40(18) . . ?
O1 Fe1 N3 149.7(2) . . ?
N1 Fe1 N3 85.5(2) . . ?
O2 Fe1 N2 84.8(2) . . ?
O3 Fe1 N2 151.1(2) . . ?
O1 Fe1 N2 120.3(2) . . ?
N1 Fe1 N2 84.0(2) . . ?
N3 Fe1 N2 86.3(2) . . ?
O2 Fe1 Dy1 47.10(11) . . ?
O3 Fe1 Dy1 46.10(11) . . ?
O1 Fe1 Dy1 46.44(11) . . ?
N1 Fe1 Dy1 128.02(15) . . ?
N3 Fe1 Dy1 128.73(14) . . ?
N2 Fe1 Dy1 128.87(16) . . ?
O5 Fe2 O4 76.71(16) . . ?
O5 Fe2 O6 78.79(16) . . ?
O4 Fe2 O6 78.61(15) . . ?
O5 Fe2 N5 84.22(18) . . ?
O4 Fe2 N5 150.24(19) . . ?
O6 Fe2 N5 120.05(19) . . ?
O5 Fe2 N4 119.37(19) . . ?
O4 Fe2 N4 84.10(17) . . ?
O6 Fe2 N4 151.25(19) . . ?
N5 Fe2 N4 85.7(2) . . ?
O5 Fe2 N6 151.69(19) . . ?
O4 Fe2 N6 121.79(18) . . ?
O6 Fe2 N6 84.06(18) . . ?
N5 Fe2 N6 85.1(2) . . ?
N4 Fe2 N6 85.8(2) . . ?
O5 Fe2 Dy1 46.96(12) . . ?
O4 Fe2 Dy1 46.28(11) . . ?
O6 Fe2 Dy1 46.68(11) . . ?
N5 Fe2 Dy1 128.43(15) . . ?
N4 Fe2 Dy1 128.31(14) . . ?
N6 Fe2 Dy1 128.38(14) . . ?
O3 Dy1 O4 178.00(14) . . ?
O3 Dy1 O1 68.48(14) . . ?
O4 Dy1 O1 112.44(14) . . ?
O3 Dy1 O6 112.75(14) . . ?
O4 Dy1 O6 68.83(13) . . ?
O1 Dy1 O6 107.30(14) . . ?
O3 Dy1 O5 112.84(14) . . ?
O4 Dy1 O5 66.39(14) . . ?
O1 Dy1 O5 175.42(15) . . ?
O6 Dy1 O5 68.12(13) . . ?
O3 Dy1 O2 66.50(14) . . ?
O4 Dy1 O2 112.01(14) . . ?
O1 Dy1 O2 68.70(14) . . ?
O6 Dy1 O2 175.98(14) . . ?
O5 Dy1 O2 115.88(14) . . ?
O3 Dy1 O11 65.02(13) . . ?
O4 Dy1 O11 113.30(13) . . ?
O1 Dy1 O11 125.38(13) . . ?
O6 Dy1 O11 115.86(13) . . ?
O5 Dy1 O11 58.22(14) . . ?
O2 Dy1 O11 67.66(13) . . ?
O3 Dy1 O8 112.89(13) . . ?
O4 Dy1 O8 65.12(13) . . ?
O1 Dy1 O8 116.95(14) . . ?
O6 Dy1 O8 124.93(12) . . ?
O5 Dy1 O8 66.91(13) . . ?
O2 Dy1 O8 58.09(13) . . ?
O11 Dy1 O8 61.17(12) . . ?
O3 Dy1 Fe1 40.18(10) . . ?
O4 Dy1 Fe1 139.46(10) . . ?
O1 Dy1 Fe1 40.43(10) . . ?
O6 Dy1 Fe1 137.05(9) . . ?
O5 Dy1 Fe1 143.21(10) . . ?
O2 Dy1 Fe1 39.86(10) . . ?
O11 Dy1 Fe1 85.01(9) . . ?
O8 Dy1 Fe1 97.95(9) . . ?
O3 Dy1 Fe2 140.36(10) . . ?
O4 Dy1 Fe2 40.15(10) . . ?
O1 Dy1 Fe2 136.66(10) . . ?
O6 Dy1 Fe2 40.48(9) . . ?
O5 Dy1 Fe2 39.62(10) . . ?
O2 Dy1 Fe2 142.48(10) . . ?
O11 Dy1 Fe2 97.84(9) . . ?
O8 Dy1 Fe2 84.46(9) . . ?
Fe1 Dy1 Fe2 176.93(2) . . ?
O22 Cl1 O20 110.5(6) . . ?
O22 Cl1 O23 119.4(7) . . ?
O20 Cl1 O23 121.6(7) . . ?
O22 Cl1 O21 97.8(5) . . ?
O20 Cl1 O21 96.8(5) . . ?
O23 Cl1 O21 104.2(7) . . ?
#=============================================================END
 
